# Supplementary material for: Dysregulated miRNAome and Proteome of PPRV Infected Goat PBMCs Reveal a Coordinated Immune Response
Source: Front Immunol. 2018 Nov 21;9:2631. doi: 10.3389/fimmu.2018.02631 (PMC6262310; doi:10.3389/fimmu.2018.02631)
Supplement: Table S1 — Summary of miRNA sequencing data. [file Table_1.xlsx]

## Sheet: DemiRNA processing
	PPRV Infected(Infected1&2)	Control (control1&2)
Total number of Reads	34576190	42000997
Trimmed Reads	34574769	41999140
Anotated reads	94817	579804
MicroRNas	8119236	9295530
Anotated microRNas	2276	7017
The data was submitted to the GEO database with accession number GSE109799.

## Sheet: Results 
	log2 FC	log CPM	P Value	FDR
miR-200c	-9.55023	15.1274	0	0
miR-21-5p	-7.2	19.5481	0	0
miR-30f	-6.97727	10.2107	6.44417e-94	6.97142e-93
miR-30d	-6.96667	15.5591	0	0
miR-10a	-5.25383	8.53117	1.05854e-26	3.70489e-26
miR-192	-5.12958	8.41205	2.39725e-24	8.15066e-24
miR-378b	-4.38547	10.3687	4.50319e-85	4.46566e-84
miR-378-2	-3.51109	12.7238	0	0
miR-139	-3.42812	6.84086	1.16382e-06	3.07765e-06
miR-181b-2	-3.31464	10.3175	5.20844e-66	3.44335e-65
miR-2427	-3.11241	10.3144	9.41543e-62	5.60218e-61
miR-452	-3.0802	9.98961	6.42882e-49	2.94242e-48
miR-342	-2.75029	12.2765	2.21069e-211	3.2884e-210
miR-210	-2.70459	7.07897	4.81874e-06	1.19465e-05
miR-149	-2.5176	6.07931	0.00371935	0.00725578
miR-129-1	-2.39318	8.26887	7.21218e-12	2.09329e-11
miR-212	-2.34953	5.9481	0.00935566	0.017128
miR-101-2	-2.19213	12.6995	2.27929e-216	3.8748e-215
miR-181a-2	-2.18668	11.0683	7.01961e-70	4.91372e-69
miR-181a-1	-2.0779	11.0782	7.70795e-66	4.82761e-65
miR-193a	-2.07196	7.98124	2.20223e-08	5.95604e-08
miR-1291	-1.86142	9.78611	1.10298e-23	3.64598e-23
miR-339a	-1.7407	10.2724	5.62061e-30	2.02683e-29
miR-7-1	-1.7374	11.6485	3.51862e-76	2.99082e-75
miR-29c	-1.73336	7.89498	1.26746e-06	3.27886e-06
miR-181b-1	-1.71861	11.1231	1.98156e-52	1.02524e-51
miR-2284x	-1.63753	11.6824	2.27714e-71	1.80653e-70
miR-185	-1.45422	11.9374	2.90849e-71	2.16319e-70
miR-24-2	-1.45028	8.79293	6.38395e-09	1.80878e-08
miR-339b	-1.43956	12.1828	5.16073e-83	4.72406e-82
miR-677	-1.3675	11.57	1.65934e-50	8.22754e-50
miR-6119	-1.00055	10.2533	3.58026e-13	1.06513e-12
miR-2411	-0.952127	7.72544	0.00544843	0.0102021
miR-4444	-0.911235	7.86054	0.000699603	0.00151369
miR-1248-2	-0.87758	8.47407	0.000612849	0.00135054
miR-2904-1	-0.778716	12.7415	3.64377e-45	1.60596e-44
miR-1248-1	-0.756258	8.37553	0.00437674	0.00840052
miR-2904-2	-0.713055	12.7467	7.84358e-39	3.11129e-38
miR-2904-3	-0.708792	12.7504	1.60811e-38	6.17308e-38
miR-2484	-0.70361	12.8493	1.24154e-40	5.27654e-40
let-7a-2	-0.582933	13.8899	1.3179e-58	7.46812e-58
miR-1434	-0.447965	9.91672	0.00197767	0.00398886
miR-2440	0.134254	13.1054	0.00233206	0.00462526
miR-2892	0.742924	7.64398	0.00996805	0.0179727
miR-744	0.791315	8.37711	0.00031071	0.000711048
miR-574	0.837973	12.1606	1.95916e-49	9.32559e-49
miR-769	1.12723	7.36402	0.000408883	0.000918057
miR-484	1.13833	10.9238	1.33346e-39	5.4718e-39
miR-2311	1.15219	6.20015	0.0275344	0.0481852
miR-142	1.16384	12.2239	4.58555e-104	6.06311e-103
miR-1281	1.24725	6.51059	0.00548682	0.0102021
miR-664b	1.36966	5.87773	0.0226565	0.0402406
miR-664a	1.37491	7.51112	3.14007e-06	7.95039e-06
miR-1282	1.37729	11.702	8.71799e-99	1.03744e-97
miR-2284z-2	1.5634	6.25686	0.00126015	0.00258549
miR-2424	1.63102	8.92534	2.04339e-21	6.57197e-21
miR-4286-2	1.69979	10.2398	1.16562e-56	6.30496e-56
miR-2897	1.84755	6.14141	0.000112235	0.000267119
miR-3533	1.87609	13.6939	0	0
miR-3432b	1.89656	8.11259	6.34995e-17	1.93755e-16
miR-6536-2	2.08839	8.80754	6.25695e-32	2.3268e-31
miR-2358	2.28119	5.87838	3.85624e-05	9.36515e-05
miR-6536-1	2.33025	7.76738	2.22697e-19	6.97394e-19
miR-3064	2.72743	5.3637	0.000121124	0.000282623
miR-1246	3.00223	14.6069	0	0
miR-2285n-5	3.35428	4.72614	0.000976584	0.00203883
miR-2285m-5	3.35428	4.72614	0.000976584	0.00203883
miR-301a	3.37485	5.72649	1.53695e-08	4.25341e-08
