# Supplementary material for: Dysregulated miRNAome and Proteome of PPRV Infected Goat PBMCs Reveal a Coordinated Immune Response
Source: Front Immunol. 2018 Nov 21;9:2631. doi: 10.3389/fimmu.2018.02631 (PMC6262310; doi:10.3389/fimmu.2018.02631)
Supplement: Table S2 — Proteome data. [file Table_2.XLSX]

## Sheet: Infected1vsControl1
Accession	Description	Score	infected_1:control_1_Ratio
Q9UI33	Sodium channel protein type 11 subunit alpha OS=Homo sapiens GN=SCN11A PE=1 SV=2	46.81	0.00416933
Q15058	Kinesin-like protein KIF14 OS=Homo sapiens GN=KIF14 PE=1 SV=1	37.22	0.0151463
Q6WKZ4	Rab11 family-interacting protein 1 OS=Homo sapiens GN=RAB11FIP1 PE=1 SV=3	16.49	0.0273237
Q8IUE6	Histone H2A type 2-B OS=Homo sapiens GN=HIST2H2AB PE=1 SV=3	10245.3	0.0308074
Q9NPP4	NLR family CARD domain-containing protein 4 OS=Homo sapiens GN=NLRC4 PE=1 SV=2	66.07	0.0347353
Q8N1M1	Bestrophin-3 OS=Homo sapiens GN=BEST3 PE=2 SV=1	141.09	0.0376283
P16104	Histone H2AX OS=Homo sapiens GN=H2AFX PE=1 SV=2	10245.3	0.0383884
Q99878	Histone H2A type 1-J OS=Homo sapiens GN=HIST1H2AJ PE=1 SV=3	10327.5	0.0391639
Q8NI35	InaD-like protein OS=Homo sapiens GN=INADL PE=1 SV=3	113.21	0.0407622
Q5T3U5	Multidrug resistance-associated protein 7 OS=Homo sapiens GN=ABCC10 PE=1 SV=1	51.45	0.0428521
Q15928	Zinc finger protein 141 OS=Homo sapiens GN=ZNF141 PE=1 SV=1	145.95	0.045502
Q13464	Rho-associated protein kinase 1 OS=Homo sapiens GN=ROCK1 PE=1 SV=1	36.07	0.0492917
Q9UNY4	Transcription termination factor 2 OS=Homo sapiens GN=TTF2 PE=1 SV=2	54.92	0.0497871
O95835	Serine/threonine-protein kinase LATS1 OS=Homo sapiens GN=LATS1 PE=1 SV=1	88.7	0.0507928
Q68DX3	FERM and PDZ domain-containing protein 2 OS=Homo sapiens GN=FRMPD2 PE=1 SV=3	44.9	0.0518189
Q9BZ29	Dedicator of cytokinesis protein 9 OS=Homo sapiens GN=DOCK9 PE=1 SV=2	42.22	0.0566989
Q92729	Receptor-type tyrosine-protein phosphatase U OS=Homo sapiens GN=PTPRU PE=1 SV=2	103.58	0.0590129
O43143	Pre-mRNA-splicing factor ATP-dependent RNA helicase DHX15 OS=Homo sapiens GN=DHX15 PE=1 SV=2	34.9	0.0596059
A6NKB5	Pecanex-like protein 2 OS=Homo sapiens GN=PCNXL2 PE=2 SV=3	84.62	0.0632918
O95248	Myotubularin-related protein 5 OS=Homo sapiens GN=SBF1 PE=1 SV=3	28.22	0.0639279
P20908	Collagen alpha-1(V) chain OS=Homo sapiens GN=COL5A1 PE=1 SV=3	55.27	0.0658748
P0C091	FRAS1-related extracellular matrix protein 3 OS=Homo sapiens GN=FREM3 PE=3 SV=2	19.15	0.0685631
Q02318	Sterol 26-hydroxylase, mitochondrial OS=Homo sapiens GN=CYP27A1 PE=1 SV=1	67.79	0.0692522
Q6PIJ6	F-box only protein 38 OS=Homo sapiens GN=FBXO38 PE=1 SV=3	108.87	0.0699482
Q86YT6	E3 ubiquitin-protein ligase MIB1 OS=Homo sapiens GN=MIB1 PE=1 SV=1	49.91	0.0699482
P35125	Ubiquitin carboxyl-terminal hydrolase 6 OS=Homo sapiens GN=USP6 PE=1 SV=2	48.97	0.0706512
Q8TEV9	Smith-Magenis syndrome chromosomal region candidate gene 8 protein OS=Homo sapiens GN=SMCR8 PE=1 SV=2	109.2	0.0720785
Q96IR2	Zinc finger protein 845 OS=Homo sapiens GN=ZNF845 PE=2 SV=3	28.7	0.07502
P51532	Transcription activator BRG1 OS=Homo sapiens GN=SMARCA4 PE=1 SV=2	37.63	0.0765356
Q9Y6D5	Brefeldin A-inhibited guanine nucleotide-exchange protein 2 OS=Homo sapiens GN=ARFGEF2 PE=1 SV=3	47.41	0.0773047
Q9NZM1	Myoferlin OS=Homo sapiens GN=MYOF PE=1 SV=1	33.23	0.0788664
Q8IX12	Cell division cycle and apoptosis regulator protein 1 OS=Homo sapiens GN=CCAR1 PE=1 SV=2	40.48	0.08291
O94880	PHD finger protein 14 OS=Homo sapiens GN=PHF14 PE=1 SV=2	98.24	0.0837432
Q8IZY2	ATP-binding cassette sub-family A member 7 OS=Homo sapiens GN=ABCA7 PE=1 SV=3	46.04	0.0845849
Q9NTI5	Sister chromatid cohesion protein PDS5 homolog B OS=Homo sapiens GN=PDS5B PE=1 SV=1	80.07	0.0862936
Q01814	Plasma membrane calcium-transporting ATPase 2 OS=Homo sapiens GN=ATP2B2 PE=1 SV=2	18.2	0.0871608
Q99250	Sodium channel protein type 2 subunit alpha OS=Homo sapiens GN=SCN2A PE=1 SV=3	38.73	0.0898153
Q05469	Hormone-sensitive lipase OS=Homo sapiens GN=LIPE PE=1 SV=4	37.67	0.0898153
O75110	Probable phospholipid-transporting ATPase IIA OS=Homo sapiens GN=ATP9A PE=1 SV=3	163.09	0.0907179
O43283	Mitogen-activated protein kinase kinase kinase 13 OS=Homo sapiens GN=MAP3K13 PE=1 SV=1	45.78	0.0925506
Q5JVG8	Zinc finger protein 506 OS=Homo sapiens GN=ZNF506 PE=2 SV=2	80.85	0.0944202
Q9P2P1	Protein NYNRIN OS=Homo sapiens GN=NYNRIN PE=2 SV=3	53.79	0.0944202
Q9P2R3	Rabankyrin-5 OS=Homo sapiens GN=ANKFY1 PE=1 SV=2	86.58	0.0963276
Q7Z2K6	Endoplasmic reticulum metallopeptidase 1 OS=Homo sapiens GN=ERMP1 PE=1 SV=2	25.63	0.0963276
Q53SF7	Cordon-bleu protein-like 1 OS=Homo sapiens GN=COBLL1 PE=1 SV=2	37.65	0.0972958
Q8IVE3	Pleckstrin homology domain-containing family H member 2 OS=Homo sapiens GN=PLEKHH2 PE=1 SV=2	92.59	0.0982736
Q9Y4B5	Microtubule cross-linking factor 1 OS=Homo sapiens GN=MTCL1 PE=1 SV=5	140.28	0.0992613
Q13127	RE1-silencing transcription factor OS=Homo sapiens GN=REST PE=1 SV=3	90.23	0.100259
O60353	Frizzled-6 OS=Homo sapiens GN=FZD6 PE=1 SV=2	29.43	0.100259
Q9UPY3	Endoribonuclease Dicer OS=Homo sapiens GN=DICER1 PE=1 SV=3	40.99	0.101266
Q5T3J3	Ligand-dependent nuclear receptor-interacting factor 1 OS=Homo sapiens GN=LRIF1 PE=1 SV=1	150.07	0.101266
Q9HC10	Otoferlin OS=Homo sapiens GN=OTOF PE=1 SV=3	61.88	0.102284
Q9H3S7	Tyrosine-protein phosphatase non-receptor type 23 OS=Homo sapiens GN=PTPN23 PE=1 SV=1	46.82	0.102284
Q9BYB0	SH3 and multiple ankyrin repeat domains protein 3 OS=Homo sapiens GN=SHANK3 PE=1 SV=3	25.34	0.107528
Q6S5H4	POTE ankyrin domain family member B OS=Homo sapiens GN=POTEB PE=2 SV=1	12.25	0.108609
Q9H6A9	Pecanex-like protein 3 OS=Homo sapiens GN=PCNXL3 PE=1 SV=2	77.8	0.110803
Q86V97	Kelch repeat and BTB domain-containing protein 6 OS=Homo sapiens GN=KBTBD6 PE=1 SV=1	47.3	0.113042
P11137	Microtubule-associated protein 2 OS=Homo sapiens GN=MAP2 PE=1 SV=4	121.92	0.113042
Q68DN1	Uncharacterized protein C2orf16 OS=Homo sapiens GN=C2orf16 PE=2 SV=3	17.08	0.113042
P35498	Sodium channel protein type 1 subunit alpha OS=Homo sapiens GN=SCN1A PE=1 SV=2	29.46	0.114178
Q8NF50	Dedicator of cytokinesis protein 8 OS=Homo sapiens GN=DOCK8 PE=1 SV=3	22.16	0.115325
P54259	Atrophin-1 OS=Homo sapiens GN=ATN1 PE=1 SV=3	114.73	0.115325
Q9P2R6	Arginine-glutamic acid dipeptide repeats protein OS=Homo sapiens GN=RERE PE=1 SV=2	54.45	0.115325
O14559	Rho GTPase-activating protein 33 OS=Homo sapiens GN=ARHGAP33 PE=1 SV=2	92.57	0.116484
Q9UHV7	Mediator of RNA polymerase II transcription subunit 13 OS=Homo sapiens GN=MED13 PE=1 SV=3	63.44	0.116484
A0JP26	POTE ankyrin domain family member B3 OS=Homo sapiens GN=POTEB3 PE=2 SV=2	12.25	0.118837
Q17RS7	Flap endonuclease GEN homolog 1 OS=Homo sapiens GN=GEN1 PE=1 SV=2	13.06	0.120032
Q8NFW1	Collagen alpha-1(XXII) chain OS=Homo sapiens GN=COL22A1 PE=2 SV=2	142.28	0.120032
Q8NDM7	Cilia- and flagella-associated protein 43 OS=Homo sapiens GN=CFAP43 PE=2 SV=3	26.03	0.120032
Q96LW1	Zinc finger protein 354B OS=Homo sapiens GN=ZNF354B PE=2 SV=1	78.03	0.120032
O75161	Nephrocystin-4 OS=Homo sapiens GN=NPHP4 PE=1 SV=2	259.67	0.120032
Q8IZC6	Collagen alpha-1(XXVII) chain OS=Homo sapiens GN=COL27A1 PE=1 SV=1	62.37	0.120032
O94929	Actin-binding LIM protein 3 OS=Homo sapiens GN=ABLIM3 PE=1 SV=3	82.82	0.121238
Q12901	Zinc finger protein 155 OS=Homo sapiens GN=ZNF155 PE=1 SV=4	113.09	0.122456
B4DXR9	Zinc finger protein 732 OS=Homo sapiens GN=ZNF732 PE=2 SV=1	109.96	0.122456
O15072	A disintegrin and metalloproteinase with thrombospondin motifs 3 OS=Homo sapiens GN=ADAMTS3 PE=2 SV=4	44.29	0.122456
Q8TDM6	Disks large homolog 5 OS=Homo sapiens GN=DLG5 PE=1 SV=4	34.77	0.122456
Q13425	Beta-2-syntrophin OS=Homo sapiens GN=SNTB2 PE=1 SV=1	22.18	0.123687
Q96PN6	Adenylate cyclase type 10 OS=Homo sapiens GN=ADCY10 PE=1 SV=3	97.79	0.123687
O75346	Zinc finger protein 253 OS=Homo sapiens GN=ZNF253 PE=2 SV=2	9.36	0.123687
Q6XUX3	Dual serine/threonine and tyrosine protein kinase OS=Homo sapiens GN=DSTYK PE=1 SV=2	41.63	0.12493
Q3SXZ3	Zinc finger protein 718 OS=Homo sapiens GN=ZNF718 PE=2 SV=1	204.52	0.130029
Q9NYF0	Dapper homolog 1 OS=Homo sapiens GN=DACT1 PE=1 SV=2	21.53	0.130029
Q70EL1	Inactive ubiquitin carboxyl-terminal hydrolase 54 OS=Homo sapiens GN=USP54 PE=1 SV=4	11.36	0.131336
Q6R327	Rapamycin-insensitive companion of mTOR OS=Homo sapiens GN=RICTOR PE=1 SV=1	44.91	0.131336
O75335	Liprin-alpha-4 OS=Homo sapiens GN=PPFIA4 PE=2 SV=3	32.08	0.131336
Q96HP0	Dedicator of cytokinesis protein 6 OS=Homo sapiens GN=DOCK6 PE=1 SV=3	31.76	0.131336
Q86X10	Ral GTPase-activating protein subunit beta OS=Homo sapiens GN=RALGAPB PE=1 SV=1	18.98	0.132655
A6NHJ4	Zinc finger protein 860 OS=Homo sapiens GN=ZNF860 PE=2 SV=3	38.21	0.132655
O00443	Phosphatidylinositol 4-phosphate 3-kinase C2 domain-containing subunit alpha OS=Homo sapiens GN=PIK3C2A PE=1 SV=2	51.85	0.135335
Q15139	Serine/threonine-protein kinase D1 OS=Homo sapiens GN=PRKD1 PE=1 SV=2	35.34	0.136695
Q9HBL0	Tensin-1 OS=Homo sapiens GN=TNS1 PE=1 SV=2	33.1	0.136695
Q13322	Growth factor receptor-bound protein 10 OS=Homo sapiens GN=GRB10 PE=1 SV=2	10.12	0.138069
Q2VY69	Zinc finger protein 284 OS=Homo sapiens GN=ZNF284 PE=2 SV=1	2.88	0.139457
Q5TCS8	Adenylate kinase 9 OS=Homo sapiens GN=AK9 PE=1 SV=2	14.43	0.139457
Q8N9W4	Golgin subfamily A member 6-like protein 2 OS=Homo sapiens GN=GOLGA6L2 PE=1 SV=2	78.89	0.142274
Q7L622	G2/M phase-specific E3 ubiquitin-protein ligase OS=Homo sapiens GN=G2E3 PE=1 SV=1	37.1	0.142274
Q9P218	Collagen alpha-1(XX) chain OS=Homo sapiens GN=COL20A1 PE=1 SV=4	45.97	0.142274
Q7Z5K2	Wings apart-like protein homolog OS=Homo sapiens GN=WAPL PE=1 SV=1	18.12	0.143704
O95996	Adenomatous polyposis coli protein 2 OS=Homo sapiens GN=APC2 PE=1 SV=1	83.25	0.143704
Q86V48	Leucine zipper protein 1 OS=Homo sapiens GN=LUZP1 PE=1 SV=2	65.16	0.145148
Q9BZE4	Nucleolar GTP-binding protein 1 OS=Homo sapiens GN=GTPBP4 PE=1 SV=3	3.51	0.145148
Q14669	E3 ubiquitin-protein ligase TRIP12 OS=Homo sapiens GN=TRIP12 PE=1 SV=1	23.81	0.145148
O94806	Serine/threonine-protein kinase D3 OS=Homo sapiens GN=PRKD3 PE=1 SV=1	6.62	0.149569
Q9NZU0	Leucine-rich repeat transmembrane protein FLRT3 OS=Homo sapiens GN=FLRT3 PE=1 SV=1	42.8	0.149569
O60765	Zinc finger protein 354A OS=Homo sapiens GN=ZNF354A PE=2 SV=2	135.3	0.149569
Q9BXU7	Ubiquitin carboxyl-terminal hydrolase 26 OS=Homo sapiens GN=USP26 PE=1 SV=1	56.49	0.149569
Q9Y4R8	Telomere length regulation protein TEL2 homolog OS=Homo sapiens GN=TELO2 PE=1 SV=2	37.12	0.151072
Q8IZD9	Dedicator of cytokinesis protein 3 OS=Homo sapiens GN=DOCK3 PE=1 SV=1	150.41	0.151072
Q2KJY2	Kinesin-like protein KIF26B OS=Homo sapiens GN=KIF26B PE=2 SV=1	47.68	0.15259
B7ZC32	Kinesin-like protein KIF28P OS=Homo sapiens GN=KIF28P PE=3 SV=2	52.16	0.154124
P27816	Microtubule-associated protein 4 OS=Homo sapiens GN=MAP4 PE=1 SV=3	188.2	0.155673
Q3MJ40	Coiled-coil domain-containing protein 144B OS=Homo sapiens GN=CCDC144B PE=2 SV=1	28.97	0.155673
Q93077	Histone H2A type 1-C OS=Homo sapiens GN=HIST1H2AC PE=1 SV=3	10327.5	0.155673
Q8TE56	A disintegrin and metalloproteinase with thrombospondin motifs 17 OS=Homo sapiens GN=ADAMTS17 PE=2 SV=2	20.62	0.155673
Q9HC52	Chromobox protein homolog 8 OS=Homo sapiens GN=CBX8 PE=1 SV=3	285.22	0.155673
Q9UQE7	Structural maintenance of chromosomes protein 3 OS=Homo sapiens GN=SMC3 PE=1 SV=2	80.68	0.157237
Q9UKA4	A-kinase anchor protein 11 OS=Homo sapiens GN=AKAP11 PE=1 SV=1	36.15	0.157237
P35658	Nuclear pore complex protein Nup214 OS=Homo sapiens GN=NUP214 PE=1 SV=2	29.23	0.157237
Q5VUR7	Ankyrin repeat domain-containing protein 20A3 OS=Homo sapiens GN=ANKRD20A3 PE=3 SV=1	35.67	0.157237
Q9Y6M7	Sodium bicarbonate cotransporter 3 OS=Homo sapiens GN=SLC4A7 PE=1 SV=2	29.22	0.158817
Q9BYP7	Serine/threonine-protein kinase WNK3 OS=Homo sapiens GN=WNK3 PE=1 SV=3	65.77	0.158817
Q9UK61	Protein TASOR OS=Homo sapiens GN=FAM208A PE=1 SV=3	20.48	0.158817
P17027	Zinc finger protein 23 OS=Homo sapiens GN=ZNF23 PE=2 SV=3	307.39	0.158817
Q8IVV2	Lipoxygenase homology domain-containing protein 1 OS=Homo sapiens GN=LOXHD1 PE=2 SV=3	73.9	0.158817
Q08AD1	Calmodulin-regulated spectrin-associated protein 2 OS=Homo sapiens GN=CAMSAP2 PE=1 SV=3	15.34	0.160414
P09884	DNA polymerase alpha catalytic subunit OS=Homo sapiens GN=POLA1 PE=1 SV=2	52.96	0.160414
Q15424	Scaffold attachment factor B1 OS=Homo sapiens GN=SAFB PE=1 SV=4	106.8	0.162026
Q8TEW8	Partitioning defective 3 homolog B OS=Homo sapiens GN=PARD3B PE=1 SV=2	70.88	0.162026
Q9BX26	Synaptonemal complex protein 2 OS=Homo sapiens GN=SYCP2 PE=2 SV=2	54.75	0.162026
Q8WX93	Palladin OS=Homo sapiens GN=PALLD PE=1 SV=3	47.31	0.162026
O14795	Protein unc-13 homolog B OS=Homo sapiens GN=UNC13B PE=1 SV=2	167.75	0.163654
Q674R7	Autophagy-related protein 9B OS=Homo sapiens GN=ATG9B PE=2 SV=1	70.54	0.163654
A2RUR9	Coiled-coil domain-containing protein 144A OS=Homo sapiens GN=CCDC144A PE=1 SV=1	60.4	0.163654
P08572	Collagen alpha-2(IV) chain OS=Homo sapiens GN=COL4A2 PE=1 SV=4	29.85	0.165299
Q15643	Thyroid receptor-interacting protein 11 OS=Homo sapiens GN=TRIP11 PE=1 SV=3	57.91	0.165299
Q5SQ80	Ankyrin repeat domain-containing protein 20A2 OS=Homo sapiens GN=ANKRD20A2 PE=3 SV=1	35.67	0.165299
Q9BUQ8	Probable ATP-dependent RNA helicase DDX23 OS=Homo sapiens GN=DDX23 PE=1 SV=3	69.22	0.16696
Q9Y4F4	Protein FAM179B OS=Homo sapiens GN=FAM179B PE=1 SV=4	67.4	0.168638
Q9Y3P9	Rab GTPase-activating protein 1 OS=Homo sapiens GN=RABGAP1 PE=1 SV=3	127.55	0.168638
Q68DC2	Ankyrin repeat and SAM domain-containing protein 6 OS=Homo sapiens GN=ANKS6 PE=1 SV=2	69.24	0.168638
Q8IYA2	Putative coiled-coil domain-containing protein 144C OS=Homo sapiens GN=CCDC144CP PE=5 SV=3	31.43	0.170333
P51805	Plexin-A3 OS=Homo sapiens GN=PLXNA3 PE=1 SV=2	48.72	0.172045
Q9GZU5	Nyctalopin OS=Homo sapiens GN=NYX PE=1 SV=1	8.08	0.172045
Q5THR3	EF-hand calcium-binding domain-containing protein 6 OS=Homo sapiens GN=EFCAB6 PE=1 SV=1	84.15	0.172045
Q5CZ79	Ankyrin repeat domain-containing protein 20B OS=Homo sapiens GN=ANKRD20A8P PE=2 SV=2	44.76	0.173774
Q8WXA9	Splicing regulatory glutamine/lysine-rich protein 1 OS=Homo sapiens GN=SREK1 PE=1 SV=1	294.97	0.173774
Q96NU0	Contactin-associated protein-like 3B OS=Homo sapiens GN=CNTNAP3B PE=2 SV=2	95.05	0.177284
Q13753	Laminin subunit gamma-2 OS=Homo sapiens GN=LAMC2 PE=1 SV=2	84.23	0.177284
Q6R2W3	SCAN domain-containing protein 3 OS=Homo sapiens GN=ZBED9 PE=2 SV=1	92.82	0.179066
Q9P2G1	Ankyrin repeat and IBR domain-containing protein 1 OS=Homo sapiens GN=ANKIB1 PE=1 SV=3	27.04	0.179066
Q6IQ26	DENN domain-containing protein 5A OS=Homo sapiens GN=DENND5A PE=1 SV=2	114.37	0.179066
Q8IY85	EF-hand calcium-binding domain-containing protein 13 OS=Homo sapiens GN=EFCAB13 PE=2 SV=2	108.29	0.179066
O75140	DEP domain-containing protein 5 OS=Homo sapiens GN=DEPDC5 PE=1 SV=2	37.55	0.180866
Q9HCE3	Zinc finger protein 532 OS=Homo sapiens GN=ZNF532 PE=1 SV=2	41.36	0.180866
Q8TAF7	Zinc finger protein 461 OS=Homo sapiens GN=ZNF461 PE=2 SV=2	27.48	0.180866
Q86U86	Protein polybromo-1 OS=Homo sapiens GN=PBRM1 PE=1 SV=1	61.34	0.182684
Q9UPN4	Centrosomal protein of 131 kDa OS=Homo sapiens GN=CEP131 PE=1 SV=3	52.94	0.182684
Q13796	Protein Shroom2 OS=Homo sapiens GN=SHROOM2 PE=1 SV=1	16.01	0.182684
Q8NDV7	Trinucleotide repeat-containing gene 6A protein OS=Homo sapiens GN=TNRC6A PE=1 SV=2	47.52	0.18452
Q9ULE3	DENN domain-containing protein 2A OS=Homo sapiens GN=DENND2A PE=2 SV=4	59.07	0.18452
Q5THK1	Protein PRR14L OS=Homo sapiens GN=PRR14L PE=1 SV=1	66.32	0.18452
P55957	BH3-interacting domain death agonist OS=Homo sapiens GN=BID PE=1 SV=1	34.18	0.186374
Q5TYW2	Ankyrin repeat domain-containing protein 20A1 OS=Homo sapiens GN=ANKRD20A1 PE=2 SV=1	38.85	0.186374
O60518	Ran-binding protein 6 OS=Homo sapiens GN=RANBP6 PE=1 SV=2	7.61	0.186374
Q9UK10	Zinc finger protein 225 OS=Homo sapiens GN=ZNF225 PE=2 SV=2	17.68	0.188247
Q8N6G6	ADAMTS-like protein 1 OS=Homo sapiens GN=ADAMTSL1 PE=1 SV=4	53.19	0.190139
P04908	Histone H2A type 1-B/E OS=Homo sapiens GN=HIST1H2AB PE=1 SV=2	10327.5	0.190139
Q9H7Z3	Protein NRDE2 homolog OS=Homo sapiens GN=NRDE2 PE=1 SV=3	56.74	0.190139
P52948	Nuclear pore complex protein Nup98-Nup96 OS=Homo sapiens GN=NUP98 PE=1 SV=4	38.39	0.19205
Q9HCM1	Uncharacterized protein KIAA1551 OS=Homo sapiens GN=KIAA1551 PE=1 SV=3	65.21	0.19205
Q9NVH2	Integrator complex subunit 7 OS=Homo sapiens GN=INTS7 PE=1 SV=1	151.64	0.19593
Q8N960	Centrosomal protein of 120 kDa OS=Homo sapiens GN=CEP120 PE=1 SV=2	27.87	0.197899
O75362	Zinc finger protein 217 OS=Homo sapiens GN=ZNF217 PE=1 SV=1	82.91	0.197899
O43707	Alpha-actinin-4 OS=Homo sapiens GN=ACTN4 PE=1 SV=2	151.16	0.197899
Q96JJ3	Engulfment and cell motility protein 2 OS=Homo sapiens GN=ELMO2 PE=1 SV=2	37.5	0.197899
Q92817	Envoplakin OS=Homo sapiens GN=EVPL PE=1 SV=3	115.52	0.197899
P78332	RNA-binding protein 6 OS=Homo sapiens GN=RBM6 PE=1 SV=5	56.97	0.199888
O14974	Protein phosphatase 1 regulatory subunit 12A OS=Homo sapiens GN=PPP1R12A PE=1 SV=1	75.73	0.199888
Q9H7R5	Zinc finger protein 665 OS=Homo sapiens GN=ZNF665 PE=2 SV=2	27.76	0.199888
Q9NZC9	SWI/SNF-related matrix-associated actin-dependent regulator of chromatin subfamily A-like protein 1 OS=Homo sapiens GN=SMARCAL1 PE=1 SV=1	49.25	0.201897
P29374	AT-rich interactive domain-containing protein 4A OS=Homo sapiens GN=ARID4A PE=1 SV=3	32.29	0.201897
O15061	Synemin OS=Homo sapiens GN=SYNM PE=1 SV=2	38.76	0.201897
Q09MP3	RAD51-associated protein 2 OS=Homo sapiens GN=RAD51AP2 PE=1 SV=1	60.79	0.201897
Q8NFA0	Ubiquitin carboxyl-terminal hydrolase 32 OS=Homo sapiens GN=USP32 PE=1 SV=1	51.43	0.203926
Q8N7Z5	Putative ankyrin repeat domain-containing protein 31 OS=Homo sapiens GN=ANKRD31 PE=5 SV=2	52.58	0.203926
Q7L590	Protein MCM10 homolog OS=Homo sapiens GN=MCM10 PE=1 SV=2	115.97	0.203926
Q9UJW7	Zinc finger protein 229 OS=Homo sapiens GN=ZNF229 PE=2 SV=3	28.01	0.203926
Q6UB98	Ankyrin repeat domain-containing protein 12 OS=Homo sapiens GN=ANKRD12 PE=1 SV=3	85.77	0.203926
Q9NRY4	Rho GTPase-activating protein 35 OS=Homo sapiens GN=ARHGAP35 PE=1 SV=3	8.04	0.203926
Q5K651	Sterile alpha motif domain-containing protein 9 OS=Homo sapiens GN=SAMD9 PE=1 SV=1	50.21	0.205975
Q149M9	NACHT domain- and WD repeat-containing protein 1 OS=Homo sapiens GN=NWD1 PE=1 SV=3	110.63	0.205975
Q8N201	Integrator complex subunit 1 OS=Homo sapiens GN=INTS1 PE=1 SV=2	72.6	0.205975
Q6ZMW3	Echinoderm microtubule-associated protein-like 6 OS=Homo sapiens GN=EML6 PE=2 SV=2	70.42	0.205975
P31327	Carbamoyl-phosphate synthase [ammonia], mitochondrial OS=Homo sapiens GN=CPS1 PE=1 SV=2	59.97	0.205975
P13726	Tissue factor OS=Homo sapiens GN=F3 PE=1 SV=1	41.15	0.205975
P11362	Fibroblast growth factor receptor 1 OS=Homo sapiens GN=FGFR1 PE=1 SV=3	26.74	0.208045
Q6ZUA9	Maestro heat-like repeat family member 5 OS=Homo sapiens GN=MROH5 PE=2 SV=2	103.79	0.208045
Q12959	Disks large homolog 1 OS=Homo sapiens GN=DLG1 PE=1 SV=2	66.03	0.208045
Q96KK5	Histone H2A type 1-H OS=Homo sapiens GN=HIST1H2AH PE=1 SV=3	10327.5	0.208045
P17039	Zinc finger protein 30 OS=Homo sapiens GN=ZNF30 PE=2 SV=5	13.63	0.208045
Q8TBY8	Polyamine-modulated factor 1-binding protein 1 OS=Homo sapiens GN=PMFBP1 PE=2 SV=1	160.72	0.208045
O60292	Signal-induced proliferation-associated 1-like protein 3 OS=Homo sapiens GN=SIPA1L3 PE=1 SV=3	37.27	0.208045
Q86VP6	Cullin-associated NEDD8-dissociated protein 1 OS=Homo sapiens GN=CAND1 PE=1 SV=2	44.49	0.210136
Q9P2S2	Neurexin-2 OS=Homo sapiens GN=NRXN2 PE=2 SV=1	156.33	0.210136
O15027	Protein transport protein Sec16A OS=Homo sapiens GN=SEC16A PE=1 SV=3	26.17	0.210136
Q4UJ75	Ankyrin repeat domain-containing protein 20A4 OS=Homo sapiens GN=ANKRD20A4 PE=3 SV=1	38.85	0.212248
P56715	Oxygen-regulated protein 1 OS=Homo sapiens GN=RP1 PE=1 SV=1	24.03	0.214381
Q14008	Cytoskeleton-associated protein 5 OS=Homo sapiens GN=CKAP5 PE=1 SV=3	74.78	0.214381
Q9NRE2	Teashirt homolog 2 OS=Homo sapiens GN=TSHZ2 PE=1 SV=3	15.33	0.216536
Q99814	Endothelial PAS domain-containing protein 1 OS=Homo sapiens GN=EPAS1 PE=1 SV=3	35.47	0.216536
P18433	Receptor-type tyrosine-protein phosphatase alpha OS=Homo sapiens GN=PTPRA PE=1 SV=2	123.44	0.216536
Q68D51	DENN domain-containing protein 2C OS=Homo sapiens GN=DENND2C PE=1 SV=2	115.78	0.216536
Q99758	ATP-binding cassette sub-family A member 3 OS=Homo sapiens GN=ABCA3 PE=1 SV=2	8.73	0.218712
Q99683	Mitogen-activated protein kinase kinase kinase 5 OS=Homo sapiens GN=MAP3K5 PE=1 SV=1	40.46	0.218712
P17038	Zinc finger protein 43 OS=Homo sapiens GN=ZNF43 PE=2 SV=4	92.6	0.218712
P22413	Ectonucleotide pyrophosphatase/phosphodiesterase family member 1 OS=Homo sapiens GN=ENPP1 PE=1 SV=2	37.88	0.22091
P23467	Receptor-type tyrosine-protein phosphatase beta OS=Homo sapiens GN=PTPRB PE=1 SV=3	38.38	0.22313
Q8NEZ3	WD repeat-containing protein 19 OS=Homo sapiens GN=WDR19 PE=1 SV=2	26.92	0.22313
Q5JSL3	Dedicator of cytokinesis protein 11 OS=Homo sapiens GN=DOCK11 PE=1 SV=2	22.08	0.22313
P09874	Poly [ADP-ribose] polymerase 1 OS=Homo sapiens GN=PARP1 PE=1 SV=4	38.23	0.22313
Q9Y2L5	Trafficking protein particle complex subunit 8 OS=Homo sapiens GN=TRAPPC8 PE=1 SV=2	23.33	0.22313
Q8IWB6	Inactive serine/threonine-protein kinase TEX14 OS=Homo sapiens GN=TEX14 PE=1 SV=2	53.29	0.22313
Q13948	Protein CASP OS=Homo sapiens GN=CUX1 PE=1 SV=2	33.21	0.225373
Q96N67	Dedicator of cytokinesis protein 7 OS=Homo sapiens GN=DOCK7 PE=1 SV=4	43.78	0.227638
O14646	Chromodomain-helicase-DNA-binding protein 1 OS=Homo sapiens GN=CHD1 PE=1 SV=2	32.57	0.227638
Q5VYS8	Terminal uridylyltransferase 7 OS=Homo sapiens GN=ZCCHC6 PE=1 SV=1	48.32	0.227638
Q96L96	Alpha-protein kinase 3 OS=Homo sapiens GN=ALPK3 PE=2 SV=2	34.63	0.227638
O75096	Low-density lipoprotein receptor-related protein 4 OS=Homo sapiens GN=LRP4 PE=1 SV=4	25.06	0.227638
P12107	Collagen alpha-1(XI) chain OS=Homo sapiens GN=COL11A1 PE=1 SV=4	76.18	0.227638
Q14185	Dedicator of cytokinesis protein 1 OS=Homo sapiens GN=DOCK1 PE=1 SV=2	33.41	0.227638
Q96DN6	Methyl-CpG-binding domain protein 6 OS=Homo sapiens GN=MBD6 PE=2 SV=2	21.81	0.229925
Q7Z5J8	Ankyrin and armadillo repeat-containing protein OS=Homo sapiens GN=ANKAR PE=2 SV=3	33.48	0.229925
Q96ND8	Zinc finger protein 583 OS=Homo sapiens GN=ZNF583 PE=2 SV=2	22.96	0.229925
Q8N766	ER membrane protein complex subunit 1 OS=Homo sapiens GN=EMC1 PE=1 SV=1	28.53	0.232236
O43897	Tolloid-like protein 1 OS=Homo sapiens GN=TLL1 PE=1 SV=1	90.94	0.232236
Q9Y5S2	Serine/threonine-protein kinase MRCK beta OS=Homo sapiens GN=CDC42BPB PE=1 SV=2	83	0.232236
O60343	TBC1 domain family member 4 OS=Homo sapiens GN=TBC1D4 PE=1 SV=2	11.1	0.232236
Q8IWU6	Extracellular sulfatase Sulf-1 OS=Homo sapiens GN=SULF1 PE=1 SV=1	59.31	0.232236
Q8WWQ0	PH-interacting protein OS=Homo sapiens GN=PHIP PE=1 SV=2	57.22	0.232236
Q03923	Zinc finger protein 85 OS=Homo sapiens GN=ZNF85 PE=1 SV=3	22.96	0.232236
Q9H1A4	Anaphase-promoting complex subunit 1 OS=Homo sapiens GN=ANAPC1 PE=1 SV=1	38.7	0.23457
Q96JM4	Leucine-rich repeat and IQ domain-containing protein 1 OS=Homo sapiens GN=LRRIQ1 PE=2 SV=3	28.29	0.23457
P98155	Very low-density lipoprotein receptor OS=Homo sapiens GN=VLDLR PE=1 SV=1	34.5	0.236928
Q86UW6	NEDD4-binding protein 2 OS=Homo sapiens GN=N4BP2 PE=1 SV=2	32.5	0.236928
A6NE52	WD repeat-containing protein KIAA1875 OS=Homo sapiens GN=KIAA1875 PE=2 SV=2	6.68	0.236928
Q6NT32	Carboxylesterase 5A OS=Homo sapiens GN=CES5A PE=2 SV=1	12.99	0.236928
Q16531	DNA damage-binding protein 1 OS=Homo sapiens GN=DDB1 PE=1 SV=1	86.27	0.236928
Q9Y2I6	Ninein-like protein OS=Homo sapiens GN=NINL PE=1 SV=2	69.67	0.236928
A1L4H1	Soluble scavenger receptor cysteine-rich domain-containing protein SSC5D OS=Homo sapiens GN=SSC5D PE=1 SV=3	18.29	0.239309
Q9NYA4	Myotubularin-related protein 4 OS=Homo sapiens GN=MTMR4 PE=1 SV=2	29.75	0.239309
P55268	Laminin subunit beta-2 OS=Homo sapiens GN=LAMB2 PE=1 SV=2	24.02	0.239309
Q96T37	Putative RNA-binding protein 15 OS=Homo sapiens GN=RBM15 PE=1 SV=2	105.66	0.241714
Q8NB42	Zinc finger protein 527 OS=Homo sapiens GN=ZNF527 PE=2 SV=2	88.16	0.241714
Q9UIG0	Tyrosine-protein kinase BAZ1B OS=Homo sapiens GN=BAZ1B PE=1 SV=2	50.94	0.241714
Q9BW04	Specifically androgen-regulated gene protein OS=Homo sapiens GN=SARG PE=1 SV=2	200.63	0.241714
Q0P6D6	Coiled-coil domain-containing protein 15 OS=Homo sapiens GN=CCDC15 PE=2 SV=2	65.15	0.241714
Q04917	14-3-3 protein eta OS=Homo sapiens GN=YWHAH PE=1 SV=4	75.66	0.244143
A6NN14	Zinc finger protein 729 OS=Homo sapiens GN=ZNF729 PE=2 SV=4	28.26	0.244143
E9PAV3	Nascent polypeptide-associated complex subunit alpha, muscle-specific form OS=Homo sapiens GN=NACA PE=1 SV=1	58.34	0.244143
Q8N8K9	Uncharacterized protein KIAA1958 OS=Homo sapiens GN=KIAA1958 PE=1 SV=1	31.27	0.246597
P0DJD0	RANBP2-like and GRIP domain-containing protein 1 OS=Homo sapiens GN=RGPD1 PE=2 SV=1	106.22	0.246597
C9JQI7	Transmembrane protein 232 OS=Homo sapiens GN=TMEM232 PE=2 SV=2	33.83	0.246597
P0CB33	Putative zinc finger protein 735 OS=Homo sapiens GN=ZNF735 PE=5 SV=1	30.3	0.246597
Q86YR6	POTE ankyrin domain family member D OS=Homo sapiens GN=POTED PE=2 SV=2	37.17	0.246597
Q9H2Y7	Zinc finger protein 106 OS=Homo sapiens GN=ZNF106 PE=1 SV=1	119.06	0.249075
P23458	Tyrosine-protein kinase JAK1 OS=Homo sapiens GN=JAK1 PE=1 SV=2	45.84	0.251579
Q96Q89	Kinesin-like protein KIF20B OS=Homo sapiens GN=KIF20B PE=1 SV=3	101.65	0.251579
Q70Z35	Phosphatidylinositol 3,4,5-trisphosphate-dependent Rac exchanger 2 protein OS=Homo sapiens GN=PREX2 PE=2 SV=1	38.72	0.251579
Q15154	Pericentriolar material 1 protein OS=Homo sapiens GN=PCM1 PE=1 SV=4	37.67	0.251579
Q15858	Sodium channel protein type 9 subunit alpha OS=Homo sapiens GN=SCN9A PE=1 SV=3	8.76	0.254107
Q5T890	DNA excision repair protein ERCC-6-like 2 OS=Homo sapiens GN=ERCC6L2 PE=1 SV=2	34.78	0.254107
P0DJD1	RANBP2-like and GRIP domain-containing protein 2 OS=Homo sapiens GN=RGPD2 PE=2 SV=1	103.12	0.254107
Q02763	Angiopoietin-1 receptor OS=Homo sapiens GN=TEK PE=1 SV=2	72.77	0.254107
Q9UJ98	Cohesin subunit SA-3 OS=Homo sapiens GN=STAG3 PE=1 SV=2	92.9	0.256661
Q96JN2	Coiled-coil domain-containing protein 136 OS=Homo sapiens GN=CCDC136 PE=1 SV=3	51.74	0.256661
Q9UGL1	Lysine-specific demethylase 5B OS=Homo sapiens GN=KDM5B PE=1 SV=3	30.4	0.256661
Q86V20	Protein FAM35A OS=Homo sapiens GN=FAM35A PE=2 SV=1	12.24	0.25924
Q92674	Centromere protein I OS=Homo sapiens GN=CENPI PE=1 SV=2	94.9	0.25924
Q8N2N9	Ankyrin repeat domain-containing protein 36B OS=Homo sapiens GN=ANKRD36B PE=1 SV=4	51.67	0.25924
Q9BQS8	FYVE and coiled-coil domain-containing protein 1 OS=Homo sapiens GN=FYCO1 PE=1 SV=3	51.26	0.261846
Q63HR2	Tensin-2 OS=Homo sapiens GN=TNS2 PE=1 SV=2	85.81	0.261846
Q9NQX4	Unconventional myosin-Vc OS=Homo sapiens GN=MYO5C PE=1 SV=2	33.73	0.264477
P59923	Zinc finger protein 445 OS=Homo sapiens GN=ZNF445 PE=1 SV=1	19.74	0.264477
Q460N5	Poly [ADP-ribose] polymerase 14 OS=Homo sapiens GN=PARP14 PE=1 SV=3	44.89	0.264477
P05023	Sodium/potassium-transporting ATPase subunit alpha-1 OS=Homo sapiens GN=ATP1A1 PE=1 SV=1	86.23	0.264477
P01871	Ig mu chain C region OS=Homo sapiens GN=IGHM PE=1 SV=3	50.58	0.264477
Q9BTC0	Death-inducer obliterator 1 OS=Homo sapiens GN=DIDO1 PE=1 SV=5	70.33	0.264477
Q9UKV3	Apoptotic chromatin condensation inducer in the nucleus OS=Homo sapiens GN=ACIN1 PE=1 SV=2	98.62	0.267135
O15054	Lysine-specific demethylase 6B OS=Homo sapiens GN=KDM6B PE=1 SV=4	54.24	0.267135
Q9NPG4	Protocadherin-12 OS=Homo sapiens GN=PCDH12 PE=1 SV=1	38.41	0.26982
Q9H0M5	Zinc finger protein 700 OS=Homo sapiens GN=ZNF700 PE=2 SV=1	49.95	0.26982
A2PYH4	Probable ATP-dependent DNA helicase HFM1 OS=Homo sapiens GN=HFM1 PE=1 SV=2	140.7	0.26982
Q14839	Chromodomain-helicase-DNA-binding protein 4 OS=Homo sapiens GN=CHD4 PE=1 SV=2	59.51	0.26982
Q5TGY3	AT-hook DNA-binding motif-containing protein 1 OS=Homo sapiens GN=AHDC1 PE=1 SV=1	36.05	0.26982
Q14160	Protein scribble homolog OS=Homo sapiens GN=SCRIB PE=1 SV=4	125	0.26982
P30622	CAP-Gly domain-containing linker protein 1 OS=Homo sapiens GN=CLIP1 PE=1 SV=2	66.58	0.272532
P23468	Receptor-type tyrosine-protein phosphatase delta OS=Homo sapiens GN=PTPRD PE=1 SV=2	28.03	0.275271
P11047	Laminin subunit gamma-1 OS=Homo sapiens GN=LAMC1 PE=1 SV=3	83.06	0.275271
Q9UKJ3	G patch domain-containing protein 8 OS=Homo sapiens GN=GPATCH8 PE=1 SV=2	11.11	0.275271
P53621	Coatomer subunit alpha OS=Homo sapiens GN=COPA PE=1 SV=2	21.9	0.278037
Q99102	Mucin-4 OS=Homo sapiens GN=MUC4 PE=1 SV=4	10.52	0.278037
Q9BXX2	Ankyrin repeat domain-containing protein 30B OS=Homo sapiens GN=ANKRD30B PE=2 SV=3	72.96	0.278037
P21675	Transcription initiation factor TFIID subunit 1 OS=Homo sapiens GN=TAF1 PE=1 SV=2	27.73	0.278037
O60344	Endothelin-converting enzyme 2 OS=Homo sapiens GN=ECE2 PE=1 SV=4	41.63	0.278037
Q9HD67	Unconventional myosin-X OS=Homo sapiens GN=MYO10 PE=1 SV=3	65.55	0.280832
Q8IYD8	Fanconi anemia group M protein OS=Homo sapiens GN=FANCM PE=1 SV=2	47.15	0.280832
Q92954	Proteoglycan 4 OS=Homo sapiens GN=PRG4 PE=1 SV=2	62.8	0.280832
P20671	Histone H2A type 1-D OS=Homo sapiens GN=HIST1H2AD PE=1 SV=2	10327.5	0.283654
Q7Z3J3	RanBP2-like and GRIP domain-containing protein 4 OS=Homo sapiens GN=RGPD4 PE=2 SV=3	73.86	0.283654
O43439	Protein CBFA2T2 OS=Homo sapiens GN=CBFA2T2 PE=1 SV=1	87.91	0.283654
P42704	Leucine-rich PPR motif-containing protein, mitochondrial OS=Homo sapiens GN=LRPPRC PE=1 SV=3	29.62	0.283654
Q9NZL3	Zinc finger protein 224 OS=Homo sapiens GN=ZNF224 PE=1 SV=3	44.7	0.286505
Q5VZL5	Zinc finger MYM-type protein 4 OS=Homo sapiens GN=ZMYM4 PE=1 SV=1	28.54	0.286505
Q8WYB5	Histone acetyltransferase KAT6B OS=Homo sapiens GN=KAT6B PE=1 SV=3	40.01	0.286505
P35573	Glycogen debranching enzyme OS=Homo sapiens GN=AGL PE=1 SV=3	73.91	0.286505
Q5H9U9	Probable ATP-dependent RNA helicase DDX60-like OS=Homo sapiens GN=DDX60L PE=2 SV=2	46.08	0.289384
Q9Y3S1	Serine/threonine-protein kinase WNK2 OS=Homo sapiens GN=WNK2 PE=1 SV=4	33.5	0.289384
Q38SD2	Leucine-rich repeat serine/threonine-protein kinase 1 OS=Homo sapiens GN=LRRK1 PE=1 SV=3	31.52	0.292293
Q7Z6E9	E3 ubiquitin-protein ligase RBBP6 OS=Homo sapiens GN=RBBP6 PE=1 SV=1	62.77	0.292293
P42694	Probable helicase with zinc finger domain OS=Homo sapiens GN=HELZ PE=1 SV=2	54.13	0.292293
Q96E39	RNA binding motif protein, X-linked-like-1 OS=Homo sapiens GN=RBMXL1 PE=1 SV=1	51.88	0.29523
Q9Y5H5	Protocadherin alpha-9 OS=Homo sapiens GN=PCDHA9 PE=2 SV=1	8.04	0.29523
Q6S5H5	POTE ankyrin domain family member G OS=Homo sapiens GN=POTEG PE=2 SV=5	68.2	0.29523
P11277	Spectrin beta chain, erythrocytic OS=Homo sapiens GN=SPTB PE=1 SV=5	80.31	0.298197
Q8TF72	Protein Shroom3 OS=Homo sapiens GN=SHROOM3 PE=1 SV=2	121.12	0.298197
Q8N1G1	RNA exonuclease 1 homolog OS=Homo sapiens GN=REXO1 PE=1 SV=3	72.54	0.298197
Q5VXU9	Uncharacterized protein C9orf84 OS=Homo sapiens GN=C9orf84 PE=2 SV=1	89.52	0.298197
Q8IWY4	Signal peptide, CUB and EGF-like domain-containing protein 1 OS=Homo sapiens GN=SCUBE1 PE=1 SV=3	37.38	0.298197
Q13635	Protein patched homolog 1 OS=Homo sapiens GN=PTCH1 PE=1 SV=2	32.67	0.301194
Q5SW79	Centrosomal protein of 170 kDa OS=Homo sapiens GN=CEP170 PE=1 SV=1	93.78	0.301194
P35052	Glypican-1 OS=Homo sapiens GN=GPC1 PE=1 SV=2	103.7	0.301194
P48736	Phosphatidylinositol 4,5-bisphosphate 3-kinase catalytic subunit gamma isoform OS=Homo sapiens GN=PIK3CG PE=1 SV=3	84.74	0.301194
P11055	Myosin-3 OS=Homo sapiens GN=MYH3 PE=1 SV=3	59.26	0.301194
P13637	Sodium/potassium-transporting ATPase subunit alpha-3 OS=Homo sapiens GN=ATP1A3 PE=1 SV=3	20.43	0.304221
Q6TFL3	Coiled-coil domain-containing protein 171 OS=Homo sapiens GN=CCDC171 PE=2 SV=1	23.8	0.304221
Q14152	Eukaryotic translation initiation factor 3 subunit A OS=Homo sapiens GN=EIF3A PE=1 SV=1	65.58	0.304221
Q5VTR2	E3 ubiquitin-protein ligase BRE1A OS=Homo sapiens GN=RNF20 PE=1 SV=2	71.23	0.307279
Q96RT6	cTAGE family member 2 OS=Homo sapiens GN=CTAGE1 PE=1 SV=2	39.32	0.307279
Q9Y5I3	Protocadherin alpha-1 OS=Homo sapiens GN=PCDHA1 PE=2 SV=1	19.42	0.307279
Q5T200	Zinc finger CCCH domain-containing protein 13 OS=Homo sapiens GN=ZC3H13 PE=1 SV=1	146.72	0.307279
Q8TDI0	Chromodomain-helicase-DNA-binding protein 5 OS=Homo sapiens GN=CHD5 PE=1 SV=1	35.58	0.307279
Q9NSV4	Protein diaphanous homolog 3 OS=Homo sapiens GN=DIAPH3 PE=1 SV=4	23.58	0.307279
Q92576	PHD finger protein 3 OS=Homo sapiens GN=PHF3 PE=1 SV=3	13.65	0.310367
Q13255	Metabotropic glutamate receptor 1 OS=Homo sapiens GN=GRM1 PE=1 SV=3	60.52	0.310367
Q08211	ATP-dependent RNA helicase A OS=Homo sapiens GN=DHX9 PE=1 SV=4	65.37	0.310367
Q9Y5H8	Protocadherin alpha-3 OS=Homo sapiens GN=PCDHA3 PE=2 SV=1	8.04	0.310367
Q9BX84	Transient receptor potential cation channel subfamily M member 6 OS=Homo sapiens GN=TRPM6 PE=1 SV=2	90.93	0.310367
Q96MR6	Cilia- and flagella-associated protein 57 OS=Homo sapiens GN=CFAP57 PE=2 SV=3	135.13	0.313486
O14529	Homeobox protein cut-like 2 OS=Homo sapiens GN=CUX2 PE=1 SV=4	105.3	0.313486
Q6ZRR9	Doublecortin domain-containing protein 5 OS=Homo sapiens GN=DCDC5 PE=2 SV=2	98.05	0.316637
Q9UIW2	Plexin-A1 OS=Homo sapiens GN=PLXNA1 PE=1 SV=3	71.35	0.316637
Q9NTJ3	Structural maintenance of chromosomes protein 4 OS=Homo sapiens GN=SMC4 PE=1 SV=2	44.37	0.316637
A6NI47	Putative POTE ankyrin domain family member M OS=Homo sapiens GN=POTEM PE=3 SV=2	68.2	0.316637
Q9UQD0	Sodium channel protein type 8 subunit alpha OS=Homo sapiens GN=SCN8A PE=1 SV=1	86.78	0.319819
Q5VYK3	Proteasome-associated protein ECM29 homolog OS=Homo sapiens GN=ECM29 PE=1 SV=2	55.94	0.319819
Q5T1B0	Axonemal dynein light chain domain-containing protein 1 OS=Homo sapiens GN=AXDND1 PE=2 SV=1	112.64	0.323033
Q92574	Hamartin OS=Homo sapiens GN=TSC1 PE=1 SV=2	64.95	0.32628
P18084	Integrin beta-5 OS=Homo sapiens GN=ITGB5 PE=1 SV=1	71.53	0.32628
Q9Y5H7	Protocadherin alpha-5 OS=Homo sapiens GN=PCDHA5 PE=2 SV=1	93.26	0.32628
Q96BY7	Autophagy-related protein 2 homolog B OS=Homo sapiens GN=ATG2B PE=1 SV=5	78.13	0.329559
Q01780	Exosome component 10 OS=Homo sapiens GN=EXOSC10 PE=1 SV=2	27.01	0.329559
Q5T5Y3	Calmodulin-regulated spectrin-associated protein 1 OS=Homo sapiens GN=CAMSAP1 PE=1 SV=2	62.41	0.332871
P10586	Receptor-type tyrosine-protein phosphatase F OS=Homo sapiens GN=PTPRF PE=1 SV=2	88.81	0.332871
Q9BY89	Uncharacterized protein KIAA1671 OS=Homo sapiens GN=KIAA1671 PE=1 SV=2	41.64	0.332871
Q9Y5H6	Protocadherin alpha-8 OS=Homo sapiens GN=PCDHA8 PE=2 SV=1	44.01	0.332871
Q8TEJ3	SH3 domain-containing RING finger protein 3 OS=Homo sapiens GN=SH3RF3 PE=1 SV=2	47.7	0.332871
Q6S545	POTE ankyrin domain family member H OS=Homo sapiens GN=POTEH PE=2 SV=3	68.2	0.332871
Q96K78	Adhesion G-protein coupled receptor G7 OS=Homo sapiens GN=ADGRG7 PE=1 SV=2	79.44	0.332871
Q5VT97	Rho GTPase-activating protein SYDE2 OS=Homo sapiens GN=SYDE2 PE=1 SV=2	120.24	0.336216
Q9UN73	Protocadherin alpha-6 OS=Homo sapiens GN=PCDHA6 PE=2 SV=1	8.04	0.336216
Q8IYX0	Zinc finger protein 679 OS=Homo sapiens GN=ZNF679 PE=1 SV=2	168.99	0.336216
Q9UII4	E3 ISG15--protein ligase HERC5 OS=Homo sapiens GN=HERC5 PE=1 SV=2	28.34	0.336216
Q9UPP2	IQ motif and SEC7 domain-containing protein 3 OS=Homo sapiens GN=IQSEC3 PE=2 SV=3	43.93	0.339596
O15439	Multidrug resistance-associated protein 4 OS=Homo sapiens GN=ABCC4 PE=1 SV=3	44.44	0.339596
Q9H9B1	Histone-lysine N-methyltransferase EHMT1 OS=Homo sapiens GN=EHMT1 PE=1 SV=4	50.9	0.339596
Q9Y5I1	Protocadherin alpha-11 OS=Homo sapiens GN=PCDHA11 PE=2 SV=1	8.04	0.339596
Q9H7N4	Splicing factor, arginine/serine-rich 19 OS=Homo sapiens GN=SCAF1 PE=1 SV=3	31.94	0.339596
O60271	C-Jun-amino-terminal kinase-interacting protein 4 OS=Homo sapiens GN=SPAG9 PE=1 SV=4	133.52	0.339596
Q9HAU5	Regulator of nonsense transcripts 2 OS=Homo sapiens GN=UPF2 PE=1 SV=1	17.55	0.339596
O43157	Plexin-B1 OS=Homo sapiens GN=PLXNB1 PE=1 SV=3	71.93	0.339596
O43345	Zinc finger protein 208 OS=Homo sapiens GN=ZNF208 PE=2 SV=2	20.97	0.343008
A0AVI2	Fer-1-like protein 5 OS=Homo sapiens GN=FER1L5 PE=2 SV=2	82.57	0.346456
Q4VCS5	Angiomotin OS=Homo sapiens GN=AMOT PE=1 SV=1	19.91	0.346456
Q9BX69	Caspase recruitment domain-containing protein 6 OS=Homo sapiens GN=CARD6 PE=1 SV=2	28.18	0.346456
O14715	RANBP2-like and GRIP domain-containing protein 8 OS=Homo sapiens GN=RGPD8 PE=1 SV=2	71.21	0.349938
Q8IZJ3	C3 and PZP-like alpha-2-macroglobulin domain-containing protein 8 OS=Homo sapiens GN=CPAMD8 PE=1 SV=2	136.86	0.349938
Q6ZNG0	Zinc finger protein 620 OS=Homo sapiens GN=ZNF620 PE=2 SV=1	65.51	0.349938
Q9UPT6	C-Jun-amino-terminal kinase-interacting protein 3 OS=Homo sapiens GN=MAPK8IP3 PE=1 SV=3	23.49	0.353455
Q8NCX0	Coiled-coil domain-containing protein 150 OS=Homo sapiens GN=CCDC150 PE=1 SV=2	81.47	0.353455
Q9BYX4	Interferon-induced helicase C domain-containing protein 1 OS=Homo sapiens GN=IFIH1 PE=1 SV=3	77.26	0.353455
Q8TCX5	Rhophilin-1 OS=Homo sapiens GN=RHPN1 PE=1 SV=1	235.74	0.353455
Q9Y2H0	Disks large-associated protein 4 OS=Homo sapiens GN=DLGAP4 PE=1 SV=3	34.77	0.353455
Q68DA7	Formin-1 OS=Homo sapiens GN=FMN1 PE=1 SV=3	29.8	0.353455
A6NKT7	RanBP2-like and GRIP domain-containing protein 3 OS=Homo sapiens GN=RGPD3 PE=3 SV=2	63.52	0.357007
P16157	Ankyrin-1 OS=Homo sapiens GN=ANK1 PE=1 SV=3	22.7	0.360595
A6NHR9	Structural maintenance of chromosomes flexible hinge domain-containing protein 1 OS=Homo sapiens GN=SMCHD1 PE=1 SV=2	53.35	0.360595
Q2TAC2	Coiled-coil domain-containing protein 57 OS=Homo sapiens GN=CCDC57 PE=1 SV=2	143.17	0.360595
Q9H1H9	Kinesin-like protein KIF13A OS=Homo sapiens GN=KIF13A PE=1 SV=2	148.74	0.364219
Q15303	Receptor tyrosine-protein kinase erbB-4 OS=Homo sapiens GN=ERBB4 PE=1 SV=1	48.07	0.364219
Q7RTP6	Protein-methionine sulfoxide oxidase MICAL3 OS=Homo sapiens GN=MICAL3 PE=1 SV=2	28.65	0.364219
P29320	Ephrin type-A receptor 3 OS=Homo sapiens GN=EPHA3 PE=1 SV=2	150.64	0.364219
Q01954	Zinc finger protein basonuclin-1 OS=Homo sapiens GN=BNC1 PE=1 SV=2	41.27	0.364219
O60293	Zinc finger C3H1 domain-containing protein OS=Homo sapiens GN=ZFC3H1 PE=1 SV=3	57.54	0.364219
Q14980	Nuclear mitotic apparatus protein 1 OS=Homo sapiens GN=NUMA1 PE=1 SV=2	82.44	0.367879
O75116	Rho-associated protein kinase 2 OS=Homo sapiens GN=ROCK2 PE=1 SV=4	30.84	0.367879
O75094	Slit homolog 3 protein OS=Homo sapiens GN=SLIT3 PE=2 SV=3	36.89	0.367879
Q9BQ90	Kelch domain-containing protein 3 OS=Homo sapiens GN=KLHDC3 PE=2 SV=1	28.74	0.371577
Q9HCE6	Rho guanine nucleotide exchange factor 10-like protein OS=Homo sapiens GN=ARHGEF10L PE=1 SV=3	23.61	0.371577
Q86UP2	Kinectin OS=Homo sapiens GN=KTN1 PE=1 SV=1	87.76	0.375311
Q6ZUT9	DENN domain-containing protein 5B OS=Homo sapiens GN=DENND5B PE=1 SV=2	39.22	0.375311
Q6ZUX3	Protein FAM179A OS=Homo sapiens GN=FAM179A PE=2 SV=2	36.38	0.379083
A6QL64	Ankyrin repeat domain-containing protein 36A OS=Homo sapiens GN=ANKRD36 PE=2 SV=3	149.03	0.379083
Q9ULU4	Protein kinase C-binding protein 1 OS=Homo sapiens GN=ZMYND8 PE=1 SV=2	78.81	0.379083
O15041	Semaphorin-3E OS=Homo sapiens GN=SEMA3E PE=1 SV=1	0.82	0.379083
Q8N9V7	Testis- and ovary-specific PAZ domain-containing protein 1 OS=Homo sapiens GN=TOPAZ1 PE=2 SV=3	84.51	0.382893
Q8NCU4	Coiled-coil domain-containing protein KIAA1407 OS=Homo sapiens GN=KIAA1407 PE=2 SV=1	63.33	0.382893
Q12766	HMG domain-containing protein 3 OS=Homo sapiens GN=HMGXB3 PE=2 SV=2	70.83	0.382893
Q6UXX5	Inter-alpha-trypsin inhibitor heavy chain H6 OS=Homo sapiens GN=ITIH6 PE=2 SV=1	66.87	0.386741
Q3B7T1	Erythroid differentiation-related factor 1 OS=Homo sapiens GN=EDRF1 PE=1 SV=1	42.65	0.386741
Q99666	RANBP2-like and GRIP domain-containing protein 5/6 OS=Homo sapiens GN=RGPD5 PE=1 SV=3	71.21	0.386741
Q5T5P2	Sickle tail protein homolog OS=Homo sapiens GN=KIAA1217 PE=1 SV=2	29.55	0.386741
Q9HCG1	Zinc finger protein 160 OS=Homo sapiens GN=ZNF160 PE=2 SV=3	30.44	0.386741
P38159	RNA-binding motif protein, X chromosome OS=Homo sapiens GN=RBMX PE=1 SV=3	43.26	0.386741
Q96HA7	Tonsoku-like protein OS=Homo sapiens GN=TONSL PE=1 SV=2	18.04	0.386741
Q8WUJ3	Cell migration-inducing and hyaluronan-binding protein OS=Homo sapiens GN=CEMIP PE=1 SV=2	26.89	0.390628
A6NES4	Maestro heat-like repeat-containing protein family member 2A OS=Homo sapiens GN=MROH2A PE=4 SV=4	11.66	0.390628
Q05707	Collagen alpha-1(XIV) chain OS=Homo sapiens GN=COL14A1 PE=1 SV=3	16.35	0.390628
Q12872	Splicing factor, suppressor of white-apricot homolog OS=Homo sapiens GN=SFSWAP PE=1 SV=3	79.05	0.390628
P29375	Lysine-specific demethylase 5A OS=Homo sapiens GN=KDM5A PE=1 SV=3	43.72	0.390628
Q7Z4N2	Transient receptor potential cation channel subfamily M member 1 OS=Homo sapiens GN=TRPM1 PE=1 SV=2	111.03	0.390628
Q7Z3Z3	Piwi-like protein 3 OS=Homo sapiens GN=PIWIL3 PE=2 SV=2	20.38	0.390628
Q8IYR0	UPF0704 protein C6orf165 OS=Homo sapiens GN=C6orf165 PE=1 SV=2	12.5	0.390628
Q8TD84	Down syndrome cell adhesion molecule-like protein 1 OS=Homo sapiens GN=DSCAML1 PE=1 SV=2	39.84	0.390628
Q9BX82	Zinc finger protein 471 OS=Homo sapiens GN=ZNF471 PE=2 SV=1	15.68	0.394554
P0C0S8	Histone H2A type 1 OS=Homo sapiens GN=HIST1H2AG PE=1 SV=2	10327.5	0.394554
O95622	Adenylate cyclase type 5 OS=Homo sapiens GN=ADCY5 PE=1 SV=3	44.19	0.394554
Q86UU1	Pleckstrin homology-like domain family B member 1 OS=Homo sapiens GN=PHLDB1 PE=1 SV=1	33.08	0.398519
Q8IVF5	T-lymphoma invasion and metastasis-inducing protein 2 OS=Homo sapiens GN=TIAM2 PE=2 SV=4	67.14	0.398519
Q9Y4L1	Hypoxia up-regulated protein 1 OS=Homo sapiens GN=HYOU1 PE=1 SV=1	154.84	0.402524
Q9UII5	Zinc finger protein 107 OS=Homo sapiens GN=ZNF107 PE=2 SV=1	99.88	0.402524
O75132	Zinc finger BED domain-containing protein 4 OS=Homo sapiens GN=ZBED4 PE=1 SV=2	23.94	0.40657
Q641Q2	WASH complex subunit FAM21A OS=Homo sapiens GN=FAM21A PE=1 SV=3	25.06	0.410656
Q96QT4	Transient receptor potential cation channel subfamily M member 7 OS=Homo sapiens GN=TRPM7 PE=1 SV=1	23.71	0.410656
Q96SK3	Zinc finger protein 607 OS=Homo sapiens GN=ZNF607 PE=1 SV=3	22.12	0.414783
P08473	Neprilysin OS=Homo sapiens GN=MME PE=1 SV=2	33.6	0.414783
Q02952	A-kinase anchor protein 12 OS=Homo sapiens GN=AKAP12 PE=1 SV=4	77.35	0.414783
Q9Y6D6	Brefeldin A-inhibited guanine nucleotide-exchange protein 1 OS=Homo sapiens GN=ARFGEF1 PE=1 SV=2	28.07	0.414783
Q14687	Genetic suppressor element 1 OS=Homo sapiens GN=GSE1 PE=1 SV=3	128.91	0.414783
P18615	Negative elongation factor E OS=Homo sapiens GN=NELFE PE=1 SV=3	265.63	0.414783
O94964	Protein SOGA1 OS=Homo sapiens GN=SOGA1 PE=1 SV=2	9.61	0.418952
Q8N2I2	Zinc finger protein 619 OS=Homo sapiens GN=ZNF619 PE=2 SV=1	16.65	0.418952
A6NFI3	Zinc finger protein 316 OS=Homo sapiens GN=ZNF316 PE=1 SV=1	53.04	0.423162
Q9ULV0	Unconventional myosin-Vb OS=Homo sapiens GN=MYO5B PE=1 SV=3	34.91	0.423162
Q96N58	Zinc finger protein 578 OS=Homo sapiens GN=ZNF578 PE=2 SV=2	3.34	0.423162
Q9HCD6	Protein TANC2 OS=Homo sapiens GN=TANC2 PE=1 SV=3	25.14	0.423162
P02458	Collagen alpha-1(II) chain OS=Homo sapiens GN=COL2A1 PE=1 SV=3	105.98	0.423162
Q8NDW8	Tetratricopeptide repeat protein 21A OS=Homo sapiens GN=TTC21A PE=2 SV=3	90.73	0.427415
Q86SQ0	Pleckstrin homology-like domain family B member 2 OS=Homo sapiens GN=PHLDB2 PE=1 SV=2	61.2	0.427415
Q5T5U3	Rho GTPase-activating protein 21 OS=Homo sapiens GN=ARHGAP21 PE=1 SV=1	9.85	0.427415
Q9NXG0	Centlein OS=Homo sapiens GN=CNTLN PE=1 SV=5	53.16	0.427415
Q9P219	Protein Daple OS=Homo sapiens GN=CCDC88C PE=1 SV=3	71.29	0.427415
A6NKG5	Retrotransposon-like protein 1 OS=Homo sapiens GN=RTL1 PE=3 SV=3	29.63	0.427415
Q3V6T2	Girdin OS=Homo sapiens GN=CCDC88A PE=1 SV=2	20.02	0.427415
O43426	Synaptojanin-1 OS=Homo sapiens GN=SYNJ1 PE=1 SV=2	43.34	0.427415
Q8N4W9	Zinc finger protein 808 OS=Homo sapiens GN=ZNF808 PE=2 SV=2	49.38	0.431711
Q9ULL1	Pleckstrin homology domain-containing family G member 1 OS=Homo sapiens GN=PLEKHG1 PE=1 SV=2	43.54	0.431711
O75127	Pentatricopeptide repeat-containing protein 1, mitochondrial OS=Homo sapiens GN=PTCD1 PE=1 SV=2	11.61	0.431711
Q6PDB4	Zinc finger protein 880 OS=Homo sapiens GN=ZNF880 PE=2 SV=2	12.17	0.436049
Q86YE8	Zinc finger protein 573 OS=Homo sapiens GN=ZNF573 PE=2 SV=4	70.29	0.436049
Q93084	Sarcoplasmic/endoplasmic reticulum calcium ATPase 3 OS=Homo sapiens GN=ATP2A3 PE=1 SV=2	63.6	0.440432
Q4KWH8	1-phosphatidylinositol 4,5-bisphosphate phosphodiesterase eta-1 OS=Homo sapiens GN=PLCH1 PE=1 SV=1	34.32	0.440432
P08621	U1 small nuclear ribonucleoprotein 70 kDa OS=Homo sapiens GN=SNRNP70 PE=1 SV=2	51.74	0.444858
Q6PL18	ATPase family AAA domain-containing protein 2 OS=Homo sapiens GN=ATAD2 PE=1 SV=1	39.46	0.444858
P29323	Ephrin type-B receptor 2 OS=Homo sapiens GN=EPHB2 PE=1 SV=5	59.97	0.444858
Q05086	Ubiquitin-protein ligase E3A OS=Homo sapiens GN=UBE3A PE=1 SV=4	41.84	0.444858
Q58EX2	Protein sidekick-2 OS=Homo sapiens GN=SDK2 PE=1 SV=3	68.18	0.444858
Q05BV3	Echinoderm microtubule-associated protein-like 5 OS=Homo sapiens GN=EML5 PE=2 SV=3	46.38	0.449329
Q02880	DNA topoisomerase 2-beta OS=Homo sapiens GN=TOP2B PE=1 SV=3	42.65	0.449329
Q86XN6	Zinc finger protein 761 OS=Homo sapiens GN=ZNF761 PE=2 SV=2	20.77	0.449329
Q8NHM5	Lysine-specific demethylase 2B OS=Homo sapiens GN=KDM2B PE=1 SV=1	56.14	0.449329
Q86WJ1	Chromodomain-helicase-DNA-binding protein 1-like OS=Homo sapiens GN=CHD1L PE=1 SV=2	59.41	0.449329
P29590	Protein PML OS=Homo sapiens GN=PML PE=1 SV=3	102.39	0.453845
Q7Z5L2	Coiled-coil domain-containing protein R3HCC1L OS=Homo sapiens GN=R3HCC1L PE=1 SV=2	6.12	0.453845
Q9UKX2	Myosin-2 OS=Homo sapiens GN=MYH2 PE=1 SV=1	62.29	0.453845
Q9H6S0	Probable ATP-dependent RNA helicase YTHDC2 OS=Homo sapiens GN=YTHDC2 PE=1 SV=2	32.39	0.453845
Q92608	Dedicator of cytokinesis protein 2 OS=Homo sapiens GN=DOCK2 PE=1 SV=2	127.16	0.458406
A7E2Y1	Myosin-7B OS=Homo sapiens GN=MYH7B PE=1 SV=3	96.44	0.458406
Q9ULU8	Calcium-dependent secretion activator 1 OS=Homo sapiens GN=CADPS PE=1 SV=3	41.93	0.458406
Q8IZS8	Voltage-dependent calcium channel subunit alpha-2/delta-3 OS=Homo sapiens GN=CACNA2D3 PE=1 SV=1	14.5	0.458406
P02462	Collagen alpha-1(IV) chain OS=Homo sapiens GN=COL4A1 PE=1 SV=3	26.58	0.458406
Q8IWJ2	GRIP and coiled-coil domain-containing protein 2 OS=Homo sapiens GN=GCC2 PE=1 SV=4	78.1	0.458406
Q92626	Peroxidasin homolog OS=Homo sapiens GN=PXDN PE=1 SV=2	74.77	0.463013
Q6S8J3	POTE ankyrin domain family member E OS=Homo sapiens GN=POTEE PE=1 SV=3	383.14	0.463013
Q5TZA2	Rootletin OS=Homo sapiens GN=CROCC PE=1 SV=1	82.83	0.463013
Q8N2E2	von Willebrand factor D and EGF domain-containing protein OS=Homo sapiens GN=VWDE PE=2 SV=4	50.95	0.463013
O75051	Plexin-A2 OS=Homo sapiens GN=PLXNA2 PE=1 SV=4	52.36	0.463013
Q9Y2K3	Myosin-15 OS=Homo sapiens GN=MYH15 PE=1 SV=5	68.78	0.463013
P13533	Myosin-6 OS=Homo sapiens GN=MYH6 PE=1 SV=5	35.4	0.467666
Q9ULE0	Protein WWC3 OS=Homo sapiens GN=WWC3 PE=1 SV=3	18.19	0.467666
Q9BYX7	Putative beta-actin-like protein 3 OS=Homo sapiens GN=POTEKP PE=5 SV=1	56.11	0.467666
Q9Y623	Myosin-4 OS=Homo sapiens GN=MYH4 PE=1 SV=2	52.1	0.467666
Q9H7M6	Zinc finger SWIM domain-containing protein 4 OS=Homo sapiens GN=ZSWIM4 PE=2 SV=3	31.28	0.467666
Q9P2E9	Ribosome-binding protein 1 OS=Homo sapiens GN=RRBP1 PE=1 SV=4	61.14	0.467666
O95382	Mitogen-activated protein kinase kinase kinase 6 OS=Homo sapiens GN=MAP3K6 PE=1 SV=3	22.55	0.472367
Q12873	Chromodomain-helicase-DNA-binding protein 3 OS=Homo sapiens GN=CHD3 PE=1 SV=3	37.01	0.472367
P12882	Myosin-1 OS=Homo sapiens GN=MYH1 PE=1 SV=3	41.34	0.477114
Q9Y5Y9	Sodium channel protein type 10 subunit alpha OS=Homo sapiens GN=SCN10A PE=1 SV=2	44.38	0.477114
Q16363	Laminin subunit alpha-4 OS=Homo sapiens GN=LAMA4 PE=1 SV=4	38.54	0.477114
O43166	Signal-induced proliferation-associated 1-like protein 1 OS=Homo sapiens GN=SIPA1L1 PE=1 SV=4	22.45	0.477114
Q9NYF8	Bcl-2-associated transcription factor 1 OS=Homo sapiens GN=BCLAF1 PE=1 SV=2	105.71	0.486752
Q5JPF3	Ankyrin repeat domain-containing protein 36C OS=Homo sapiens GN=ANKRD36C PE=2 SV=3	48.44	0.486752
Q8NEY1	Neuron navigator 1 OS=Homo sapiens GN=NAV1 PE=1 SV=2	16.58	0.491644
Q9Y4I1	Unconventional myosin-Va OS=Homo sapiens GN=MYO5A PE=1 SV=2	63.42	0.491644
Q8IX21	SMC5-SMC6 complex localization factor protein 2 OS=Homo sapiens GN=SLF2 PE=1 SV=2	57.65	0.491644
Q86TC9	Myopalladin OS=Homo sapiens GN=MYPN PE=1 SV=2	112.2	0.496585
Q8N7X0	Androglobin OS=Homo sapiens GN=ADGB PE=2 SV=3	35.95	0.496585
Q9NYK1	Toll-like receptor 7 OS=Homo sapiens GN=TLR7 PE=2 SV=1	24.01	0.496585
Q9ULI0	ATPase family AAA domain-containing protein 2B OS=Homo sapiens GN=ATAD2B PE=1 SV=3	40.06	0.496585
Q9BZ76	Contactin-associated protein-like 3 OS=Homo sapiens GN=CNTNAP3 PE=2 SV=3	44	0.496585
O43151	Methylcytosine dioxygenase TET3 OS=Homo sapiens GN=TET3 PE=1 SV=3	31.8	0.496585
Q3ZCX4	Zinc finger protein 568 OS=Homo sapiens GN=ZNF568 PE=2 SV=2	29.64	0.501576
Q15477	Helicase SKI2W OS=Homo sapiens GN=SKIV2L PE=1 SV=3	45.71	0.501576
Q9UKX3	Myosin-13 OS=Homo sapiens GN=MYH13 PE=2 SV=2	35.27	0.501576
Q9NWL6	Asparagine synthetase domain-containing protein 1 OS=Homo sapiens GN=ASNSD1 PE=2 SV=2	56.8	0.501576
B1ANS9	WD repeat-containing protein 64 OS=Homo sapiens GN=WDR64 PE=2 SV=1	45.1	0.501576
O95450	A disintegrin and metalloproteinase with thrombospondin motifs 2 OS=Homo sapiens GN=ADAMTS2 PE=2 SV=2	98.13	0.506617
Q86UR5	Regulating synaptic membrane exocytosis protein 1 OS=Homo sapiens GN=RIMS1 PE=1 SV=1	38.18	0.506617
Q06278	Aldehyde oxidase OS=Homo sapiens GN=AOX1 PE=1 SV=2	64.1	0.506617
Q12888	Tumor suppressor p53-binding protein 1 OS=Homo sapiens GN=TP53BP1 PE=1 SV=2	40.23	0.506617
P02452	Collagen alpha-1(I) chain OS=Homo sapiens GN=COL1A1 PE=1 SV=5	99.79	0.506617
Q9Y2H8	Zinc finger protein 510 OS=Homo sapiens GN=ZNF510 PE=2 SV=1	31.8	0.506617
Q8IVF6	Ankyrin repeat domain-containing protein 18A OS=Homo sapiens GN=ANKRD18A PE=2 SV=3	48.89	0.506617
A2RRD8	Zinc finger protein 320 OS=Homo sapiens GN=ZNF320 PE=1 SV=1	41.89	0.511709
Q00610	Clathrin heavy chain 1 OS=Homo sapiens GN=CLTC PE=1 SV=5	15.24	0.511709
Q9Y4B4	Helicase ARIP4 OS=Homo sapiens GN=RAD54L2 PE=1 SV=4	134.66	0.511709
Q9H5L6	DNA transposase THAP9 OS=Homo sapiens GN=THAP9 PE=1 SV=2	57.01	0.511709
P17035	Zinc finger protein 28 OS=Homo sapiens GN=ZNF28 PE=2 SV=5	34.05	0.511709
Q8WWL7	G2/mitotic-specific cyclin-B3 OS=Homo sapiens GN=CCNB3 PE=1 SV=2	36.22	0.511709
P35221	Catenin alpha-1 OS=Homo sapiens GN=CTNNA1 PE=1 SV=1	93.19	0.516851
Q9UBV2	Protein sel-1 homolog 1 OS=Homo sapiens GN=SEL1L PE=1 SV=3	77.82	0.516851
Q8TF46	DIS3-like exonuclease 1 OS=Homo sapiens GN=DIS3L PE=1 SV=2	20.56	0.516851
Q6GYQ0	Ral GTPase-activating protein subunit alpha-1 OS=Homo sapiens GN=RALGAPA1 PE=1 SV=1	34.19	0.516851
Q6PIF6	Unconventional myosin-VIIb OS=Homo sapiens GN=MYO7B PE=1 SV=2	38.7	0.522046
Q9H5H4	Zinc finger protein 768 OS=Homo sapiens GN=ZNF768 PE=1 SV=2	94.38	0.522046
O60244	Mediator of RNA polymerase II transcription subunit 14 OS=Homo sapiens GN=MED14 PE=1 SV=2	44.13	0.522046
Q2M1P5	Kinesin-like protein KIF7 OS=Homo sapiens GN=KIF7 PE=1 SV=2	42.01	0.527292
Q92614	Unconventional myosin-XVIIIa OS=Homo sapiens GN=MYO18A PE=1 SV=3	49.45	0.527292
Q8WWN8	Arf-GAP with Rho-GAP domain, ANK repeat and PH domain-containing protein 3 OS=Homo sapiens GN=ARAP3 PE=1 SV=1	84.36	0.527292
P12883	Myosin-7 OS=Homo sapiens GN=MYH7 PE=1 SV=5	50.2	0.532592
O14654	Insulin receptor substrate 4 OS=Homo sapiens GN=IRS4 PE=1 SV=1	65.18	0.532592
Q8IZF0	Sodium leak channel non-selective protein OS=Homo sapiens GN=NALCN PE=1 SV=1	63.81	0.532592
Q6N043	Zinc finger protein 280D OS=Homo sapiens GN=ZNF280D PE=1 SV=3	51.35	0.537944
Q6N021	Methylcytosine dioxygenase TET2 OS=Homo sapiens GN=TET2 PE=1 SV=3	16.76	0.537944
P11387	DNA topoisomerase 1 OS=Homo sapiens GN=TOP1 PE=1 SV=2	38.42	0.543351
Q13123	Protein Red OS=Homo sapiens GN=IK PE=1 SV=3	203.63	0.543351
Q9Y4C0	Neurexin-3 OS=Homo sapiens GN=NRXN3 PE=1 SV=4	62.2	0.543351
Q8TCU6	Phosphatidylinositol 3,4,5-trisphosphate-dependent Rac exchanger 1 protein OS=Homo sapiens GN=PREX1 PE=1 SV=3	38.07	0.543351
Q8TF20	Zinc finger protein 721 OS=Homo sapiens GN=ZNF721 PE=2 SV=2	158.9	0.554327
Q9UPQ0	LIM and calponin homology domains-containing protein 1 OS=Homo sapiens GN=LIMCH1 PE=1 SV=4	22.78	0.559898
H7BZ55	Putative ciliary rootlet coiled-coil protein 2 OS=Homo sapiens GN=CROCC2 PE=5 SV=3	96.13	0.559898
A6NP11	Zinc finger protein 716 OS=Homo sapiens GN=ZNF716 PE=2 SV=4	202.56	0.559898
Q6ZR52	Zinc finger protein 493 OS=Homo sapiens GN=ZNF493 PE=2 SV=3	12.37	0.559898
Q06730	Zinc finger protein 33A OS=Homo sapiens GN=ZNF33A PE=1 SV=3	72.36	0.559898
Q6ZVF9	G protein-regulated inducer of neurite outgrowth 3 OS=Homo sapiens GN=GPRIN3 PE=2 SV=2	79.51	0.565525
O14578	Citron Rho-interacting kinase OS=Homo sapiens GN=CIT PE=1 SV=2	53.73	0.565525
Q96J94	Piwi-like protein 1 OS=Homo sapiens GN=PIWIL1 PE=1 SV=1	7.95	0.565525
B1AJZ9	Forkhead-associated domain-containing protein 1 OS=Homo sapiens GN=FHAD1 PE=2 SV=2	45.1	0.571209
Q9H2G2	STE20-like serine/threonine-protein kinase OS=Homo sapiens GN=SLK PE=1 SV=1	82.17	0.571209
Q7Z406	Myosin-14 OS=Homo sapiens GN=MYH14 PE=1 SV=2	95.2	0.571209
P13942	Collagen alpha-2(XI) chain OS=Homo sapiens GN=COL11A2 PE=1 SV=5	80.39	0.571209
O95428	Papilin OS=Homo sapiens GN=PAPLN PE=2 SV=4	8.97	0.57695
O95425	Supervillin OS=Homo sapiens GN=SVIL PE=1 SV=2	31.79	0.57695
Q13459	Unconventional myosin-IXb OS=Homo sapiens GN=MYO9B PE=1 SV=3	52.05	0.57695
Q5JSZ5	Protein PRRC2B OS=Homo sapiens GN=PRRC2B PE=1 SV=2	120.45	0.57695
Q96L93	Kinesin-like protein KIF16B OS=Homo sapiens GN=KIF16B PE=1 SV=2	66.51	0.57695
Q16630	Cleavage and polyadenylation specificity factor subunit 6 OS=Homo sapiens GN=CPSF6 PE=1 SV=2	92.05	0.582748
Q9UHB6	LIM domain and actin-binding protein 1 OS=Homo sapiens GN=LIMA1 PE=1 SV=1	93.9	0.582748
Q92771	Putative ATP-dependent RNA helicase DDX12 OS=Homo sapiens GN=DDX12P PE=5 SV=3	102.3	0.588605
Q9NYW8	RB-associated KRAB zinc finger protein OS=Homo sapiens GN=RBAK PE=1 SV=1	39.23	0.588605
O43719	HIV Tat-specific factor 1 OS=Homo sapiens GN=HTATSF1 PE=1 SV=1	53.7	0.588605
Q96KQ7	Histone-lysine N-methyltransferase EHMT2 OS=Homo sapiens GN=EHMT2 PE=1 SV=3	56.96	0.588605
Q7Z2K8	G protein-regulated inducer of neurite outgrowth 1 OS=Homo sapiens GN=GPRIN1 PE=2 SV=2	89.62	0.588605
P13535	Myosin-8 OS=Homo sapiens GN=MYH8 PE=1 SV=3	33.15	0.594521
Q5TAP6	U3 small nucleolar RNA-associated protein 14 homolog C OS=Homo sapiens GN=UTP14C PE=1 SV=1	98.17	0.594521
Q9UKI8	Serine/threonine-protein kinase tousled-like 1 OS=Homo sapiens GN=TLK1 PE=1 SV=2	100.6	0.594521
Q04637	Eukaryotic translation initiation factor 4 gamma 1 OS=Homo sapiens GN=EIF4G1 PE=1 SV=4	12.4	0.594521
Q92610	Zinc finger protein 592 OS=Homo sapiens GN=ZNF592 PE=1 SV=2	47.83	0.600496
Q9UPV0	Centrosomal protein of 164 kDa OS=Homo sapiens GN=CEP164 PE=1 SV=3	59.98	0.600496
Q6ZT12	E3 ubiquitin-protein ligase UBR3 OS=Homo sapiens GN=UBR3 PE=2 SV=2	68.79	0.600496
Q13224	Glutamate receptor ionotropic, NMDA 2B OS=Homo sapiens GN=GRIN2B PE=1 SV=3	50.81	0.600496
Q12789	General transcription factor 3C polypeptide 1 OS=Homo sapiens GN=GTF3C1 PE=1 SV=4	62.79	0.600496
Q8NFD5	AT-rich interactive domain-containing protein 1B OS=Homo sapiens GN=ARID1B PE=1 SV=2	68.59	0.606531
Q14997	Proteasome activator complex subunit 4 OS=Homo sapiens GN=PSME4 PE=1 SV=2	1.74	0.606531
Q702N8	Xin actin-binding repeat-containing protein 1 OS=Homo sapiens GN=XIRP1 PE=1 SV=1	23.52	0.606531
Q9BUY5	Zinc finger protein 426 OS=Homo sapiens GN=ZNF426 PE=1 SV=1	44.99	0.606531
Q86VM9	Zinc finger CCCH domain-containing protein 18 OS=Homo sapiens GN=ZC3H18 PE=1 SV=2	34.43	0.612626
P57078	Receptor-interacting serine/threonine-protein kinase 4 OS=Homo sapiens GN=RIPK4 PE=1 SV=1	60.86	0.612626
P48634	Protein PRRC2A OS=Homo sapiens GN=PRRC2A PE=1 SV=3	98.11	0.612626
O60522	Tudor domain-containing protein 6 OS=Homo sapiens GN=TDRD6 PE=2 SV=2	45.79	0.612626
Q06732	Zinc finger protein 33B OS=Homo sapiens GN=ZNF33B PE=1 SV=2	75.73	0.612626
Q9NRD9	Dual oxidase 1 OS=Homo sapiens GN=DUOX1 PE=1 SV=1	49.49	0.618783
O00750	Phosphatidylinositol 4-phosphate 3-kinase C2 domain-containing subunit beta OS=Homo sapiens GN=PIK3C2B PE=1 SV=2	30.01	0.618783
O14727	Apoptotic protease-activating factor 1 OS=Homo sapiens GN=APAF1 PE=1 SV=2	59.44	0.618783
Q8IWV7	E3 ubiquitin-protein ligase UBR1 OS=Homo sapiens GN=UBR1 PE=1 SV=1	33.11	0.618783
Q8NFU7	Methylcytosine dioxygenase TET1 OS=Homo sapiens GN=TET1 PE=1 SV=2	45.79	0.625002
Q9NZI8	Insulin-like growth factor 2 mRNA-binding protein 1 OS=Homo sapiens GN=IGF2BP1 PE=1 SV=2	97.06	0.625002
Q9ULG1	DNA helicase INO80 OS=Homo sapiens GN=INO80 PE=1 SV=2	143.2	0.625002
O00571	ATP-dependent RNA helicase DDX3X OS=Homo sapiens GN=DDX3X PE=1 SV=3	39.13	0.625002
P17252	Protein kinase C alpha type OS=Homo sapiens GN=PRKCA PE=1 SV=4	26.97	0.625002
Q8N1I0	Dedicator of cytokinesis protein 4 OS=Homo sapiens GN=DOCK4 PE=1 SV=3	65.48	0.625002
Q99460	26S proteasome non-ATPase regulatory subunit 1 OS=Homo sapiens GN=PSMD1 PE=1 SV=2	29.99	0.631284
Q9P232	Contactin-3 OS=Homo sapiens GN=CNTN3 PE=1 SV=3	31.81	0.631284
O60241	Adhesion G protein-coupled receptor B2 OS=Homo sapiens GN=ADGRB2 PE=1 SV=2	43.92	0.631284
Q6ZV73	FYVE, RhoGEF and PH domain-containing protein 6 OS=Homo sapiens GN=FGD6 PE=1 SV=2	22.08	0.637628
Q13017	Rho GTPase-activating protein 5 OS=Homo sapiens GN=ARHGAP5 PE=1 SV=2	20.61	0.637628
Q96J65	Multidrug resistance-associated protein 9 OS=Homo sapiens GN=ABCC12 PE=1 SV=2	72.88	0.644036
O43432	Eukaryotic translation initiation factor 4 gamma 3 OS=Homo sapiens GN=EIF4G3 PE=1 SV=2	40.52	0.650509
P49750	YLP motif-containing protein 1 OS=Homo sapiens GN=YLPM1 PE=1 SV=3	48.96	0.66365
Q0VF96	Cingulin-like protein 1 OS=Homo sapiens GN=CGNL1 PE=1 SV=2	68.27	0.67032
Q9GZU2	Paternally-expressed gene 3 protein OS=Homo sapiens GN=PEG3 PE=1 SV=1	20.27	0.67032
Q9ULH0	Kinase D-interacting substrate of 220 kDa OS=Homo sapiens GN=KIDINS220 PE=1 SV=3	27.78	0.67032
Q9H7D0	Dedicator of cytokinesis protein 5 OS=Homo sapiens GN=DOCK5 PE=1 SV=3	33.13	0.67032
P11388	DNA topoisomerase 2-alpha OS=Homo sapiens GN=TOP2A PE=1 SV=3	30.91	0.677057
Q92618	Zinc finger protein 516 OS=Homo sapiens GN=ZNF516 PE=1 SV=1	3.78	0.677057
Q8NEV8	Exophilin-5 OS=Homo sapiens GN=EXPH5 PE=1 SV=3	74.95	0.677057
P42356	Phosphatidylinositol 4-kinase alpha OS=Homo sapiens GN=PI4KA PE=1 SV=3	93.88	0.677057
Q7Z745	Maestro heat-like repeat-containing protein family member 2B OS=Homo sapiens GN=MROH2B PE=2 SV=3	47.29	0.677057
O75901	Ras association domain-containing protein 9 OS=Homo sapiens GN=RASSF9 PE=2 SV=2	110.27	0.683861
A9Z1Z3	Fer-1-like protein 4 OS=Homo sapiens GN=FER1L4 PE=2 SV=1	52.39	0.683861
Q2PPJ7	Ral GTPase-activating protein subunit alpha-2 OS=Homo sapiens GN=RALGAPA2 PE=1 SV=2	97.22	0.683861
Q8N4C6	Ninein OS=Homo sapiens GN=NIN PE=1 SV=4	38.32	0.690734
O94822	E3 ubiquitin-protein ligase listerin OS=Homo sapiens GN=LTN1 PE=1 SV=6	135.04	0.697676
O95104	Splicing factor, arginine/serine-rich 15 OS=Homo sapiens GN=SCAF4 PE=1 SV=3	53.04	0.697676
Q05481	Zinc finger protein 91 OS=Homo sapiens GN=ZNF91 PE=2 SV=2	25.54	0.697676
Q96J92	Serine/threonine-protein kinase WNK4 OS=Homo sapiens GN=WNK4 PE=1 SV=1	11.37	0.697676
Q8TBB1	E3 ubiquitin-protein ligase LNX OS=Homo sapiens GN=LNX1 PE=1 SV=1	36.59	0.697676
Q6ZU35	Uncharacterized protein KIAA1211 OS=Homo sapiens GN=KIAA1211 PE=1 SV=3	65.57	0.704688
Q08379	Golgin subfamily A member 2 OS=Homo sapiens GN=GOLGA2 PE=1 SV=3	20.88	0.704688
Q562E7	WD repeat-containing protein 81 OS=Homo sapiens GN=WDR81 PE=1 SV=2	8.13	0.704688
Q8TF74	WAS/WASL-interacting protein family member 2 OS=Homo sapiens GN=WIPF2 PE=1 SV=1	14.59	0.704688
O94910	Adhesion G protein-coupled receptor L1 OS=Homo sapiens GN=ADGRL1 PE=1 SV=1	67.91	0.71177
P18206	Vinculin OS=Homo sapiens GN=VCL PE=1 SV=4	26	0.71177
Q5TAX3	Terminal uridylyltransferase 4 OS=Homo sapiens GN=ZCCHC11 PE=1 SV=3	40.69	0.71177
O75923	Dysferlin OS=Homo sapiens GN=DYSF PE=1 SV=1	50.79	0.718924
P51693	Amyloid-like protein 1 OS=Homo sapiens GN=APLP1 PE=1 SV=3	30.01	0.726149
Q8NDQ6	Zinc finger protein 540 OS=Homo sapiens GN=ZNF540 PE=1 SV=1	44.03	0.726149
Q12840	Kinesin heavy chain isoform 5A OS=Homo sapiens GN=KIF5A PE=1 SV=2	108.88	0.726149
O14497	AT-rich interactive domain-containing protein 1A OS=Homo sapiens GN=ARID1A PE=1 SV=3	41.87	0.726149
Q9Y2L1	Exosome complex exonuclease RRP44 OS=Homo sapiens GN=DIS3 PE=1 SV=2	83.36	0.726149
A6NC98	Coiled-coil domain-containing protein 88B OS=Homo sapiens GN=CCDC88B PE=1 SV=1	144.43	0.740818
P49815	Tuberin OS=Homo sapiens GN=TSC2 PE=1 SV=2	7.54	0.740818
Q7Z460	CLIP-associating protein 1 OS=Homo sapiens GN=CLASP1 PE=1 SV=1	103.48	0.755784
Q9BY66	Lysine-specific demethylase 5D OS=Homo sapiens GN=KDM5D PE=1 SV=2	42.89	0.763379
P41229	Lysine-specific demethylase 5C OS=Homo sapiens GN=KDM5C PE=1 SV=2	66.65	0.763379
Q9NQT8	Kinesin-like protein KIF13B OS=Homo sapiens GN=KIF13B PE=1 SV=2	31.94	0.771052
O60840	Voltage-dependent L-type calcium channel subunit alpha-1F OS=Homo sapiens GN=CACNA1F PE=1 SV=2	33.74	0.771052
P00519	Tyrosine-protein kinase ABL1 OS=Homo sapiens GN=ABL1 PE=1 SV=4	86.58	0.771052
O15063	Uncharacterized protein KIAA0355 OS=Homo sapiens GN=KIAA0355 PE=1 SV=2	20.06	0.771052
P35579	Myosin-9 OS=Homo sapiens GN=MYH9 PE=1 SV=4	226.61	0.771052
P82987	ADAMTS-like protein 3 OS=Homo sapiens GN=ADAMTSL3 PE=1 SV=4	8.8	0.778801
Q9C093	Sperm flagellar protein 2 OS=Homo sapiens GN=SPEF2 PE=1 SV=2	38.79	0.778801
Q8IWB4	Spermatogenesis-associated protein 31A7 OS=Homo sapiens GN=SPATA31A7 PE=2 SV=4	27.69	0.778801
P13497	Bone morphogenetic protein 1 OS=Homo sapiens GN=BMP1 PE=1 SV=2	23.56	0.786628
Q13310	Polyadenylate-binding protein 4 OS=Homo sapiens GN=PABPC4 PE=1 SV=1	18.23	0.786628
Q9BZF9	Uveal autoantigen with coiled-coil domains and ankyrin repeats OS=Homo sapiens GN=UACA PE=1 SV=2	79.48	0.786628
Q9UHB7	AF4/FMR2 family member 4 OS=Homo sapiens GN=AFF4 PE=1 SV=1	74.08	0.786628
P35749	Myosin-11 OS=Homo sapiens GN=MYH11 PE=1 SV=3	64.81	0.794534
Q9H792	Pseudopodium-enriched atypical kinase 1 OS=Homo sapiens GN=PEAK1 PE=1 SV=4	49.74	0.802519
Q5VYP0	Spermatogenesis-associated protein 31A3 OS=Homo sapiens GN=SPATA31A3 PE=2 SV=1	19.93	0.810584
Q96PF1	Protein-glutamine gamma-glutamyltransferase Z OS=Homo sapiens GN=TGM7 PE=2 SV=1	105.39	0.818731
Q9ULI3	Protein HEG homolog 1 OS=Homo sapiens GN=HEG1 PE=1 SV=3	34.83	0.818731
Q9BXM0	Periaxin OS=Homo sapiens GN=PRX PE=1 SV=2	81.42	0.818731
Q6PG37	Zinc finger protein 790 OS=Homo sapiens GN=ZNF790 PE=2 SV=2	1.9	0.83527
Q5VU36	Spermatogenesis-associated protein 31A5 OS=Homo sapiens GN=SPATA31A5 PE=3 SV=1	19.93	0.843665
Q5JUK3	Potassium channel subfamily T member 1 OS=Homo sapiens GN=KCNT1 PE=1 SV=2	41.23	0.843665
Q9H0X9	Oxysterol-binding protein-related protein 5 OS=Homo sapiens GN=OSBPL5 PE=1 SV=1	21.41	0.852144
Q96QB1	Rho GTPase-activating protein 7 OS=Homo sapiens GN=DLC1 PE=1 SV=4	26.1	0.860708
Q6P9A2	Polypeptide N-acetylgalactosaminyltransferase 18 OS=Homo sapiens GN=GALNT18 PE=2 SV=2	106.18	0.860708
P0CJ79	Zinc finger protein 888 OS=Homo sapiens GN=ZNF888 PE=3 SV=1	15.67	0.860708
Q9UF56	F-box/LRR-repeat protein 17 OS=Homo sapiens GN=FBXL17 PE=2 SV=3	33.46	0.869358
Q5M9N0	Coiled-coil domain-containing protein 158 OS=Homo sapiens GN=CCDC158 PE=1 SV=2	54.18	0.869358
O75147	Obscurin-like protein 1 OS=Homo sapiens GN=OBSL1 PE=1 SV=4	23.76	0.878095
Q8N883	Zinc finger protein 614 OS=Homo sapiens GN=ZNF614 PE=1 SV=2	33.33	0.88692
Q15418	Ribosomal protein S6 kinase alpha-1 OS=Homo sapiens GN=RPS6KA1 PE=1 SV=2	49.44	0.895834
Q17RW2	Collagen alpha-1(XXIV) chain OS=Homo sapiens GN=COL24A1 PE=1 SV=2	16.12	0.904837
Q5VTJ3	Kelch domain-containing protein 7A OS=Homo sapiens GN=KLHDC7A PE=1 SV=5	3.67	0.904837
P0DKV0	Spermatogenesis-associated protein 31C1 OS=Homo sapiens GN=SPATA31C1 PE=2 SV=1	25.74	0.904837
Q66GS9	Centrosomal protein of 135 kDa OS=Homo sapiens GN=CEP135 PE=1 SV=2	59.02	0.904837
Q5RHP9	Glutamate-rich protein 3 OS=Homo sapiens GN=ERICH3 PE=2 SV=1	26.33	0.904837
Q96RE9	Zinc finger protein 300 OS=Homo sapiens GN=ZNF300 PE=1 SV=1	35.68	0.913931
O95206	Protocadherin-8 OS=Homo sapiens GN=PCDH8 PE=2 SV=2	35.32	0.913931
Q86XA9	HEAT repeat-containing protein 5A OS=Homo sapiens GN=HEATR5A PE=1 SV=2	144.15	0.913931
Q86VF7	Nebulin-related-anchoring protein OS=Homo sapiens GN=NRAP PE=2 SV=2	59.17	0.923116
P09848	Lactase-phlorizin hydrolase OS=Homo sapiens GN=LCT PE=1 SV=3	27.13	0.923116
Q9Y4F5	Centrosomal protein of 170 kDa protein B OS=Homo sapiens GN=CEP170B PE=1 SV=4	36.61	0.923116
Q9HCM2	Plexin-A4 OS=Homo sapiens GN=PLXNA4 PE=1 SV=4	20.87	0.923116
Q14978	Nucleolar and coiled-body phosphoprotein 1 OS=Homo sapiens GN=NOLC1 PE=1 SV=2	57.1	0.941765
Q8NB50	Zinc finger protein 62 homolog OS=Homo sapiens GN=ZFP62 PE=1 SV=3	63.36	0.941765
O60303	Uncharacterized protein KIAA0556 OS=Homo sapiens GN=KIAA0556 PE=1 SV=4	32.31	0.941765
P35580	Myosin-10 OS=Homo sapiens GN=MYH10 PE=1 SV=3	51.53	0.941765
O43150	Arf-GAP with SH3 domain, ANK repeat and PH domain-containing protein 2 OS=Homo sapiens GN=ASAP2 PE=1 SV=3	38.22	0.941765
Q9P227	Rho GTPase-activating protein 23 OS=Homo sapiens GN=ARHGAP23 PE=1 SV=2	87.36	0.951229
Q6RI45	Bromodomain and WD repeat-containing protein 3 OS=Homo sapiens GN=BRWD3 PE=1 SV=2	24.76	0.960789
Q9P2L0	WD repeat-containing protein 35 OS=Homo sapiens GN=WDR35 PE=1 SV=3	45.07	0.970446
Q92932	Receptor-type tyrosine-protein phosphatase N2 OS=Homo sapiens GN=PTPRN2 PE=1 SV=2	150.81	0.970446
Q8N7Q3	Zinc finger protein 676 OS=Homo sapiens GN=ZNF676 PE=2 SV=2	47.23	0.980199
A6NHR8	Putative protein FAM47D OS=Homo sapiens GN=FAM47DP PE=5 SV=3	22.75	0.99005
B4DYI2	Spermatogenesis-associated protein 31C2 OS=Homo sapiens GN=SPATA31C2 PE=2 SV=2	30.82	1
Q03181	Peroxisome proliferator-activated receptor delta OS=Homo sapiens GN=PPARD PE=1 SV=1	18.94	1
Q8IUD2	ELKS/Rab6-interacting/CAST family member 1 OS=Homo sapiens GN=ERC1 PE=1 SV=1	47.31	1.01005
O94986	Centrosomal protein of 152 kDa OS=Homo sapiens GN=CEP152 PE=1 SV=4	67.15	1.01005
Q99879	Histone H2B type 1-M OS=Homo sapiens GN=HIST1H2BM PE=1 SV=3	1478.51	1.0202
Q15349	Ribosomal protein S6 kinase alpha-2 OS=Homo sapiens GN=RPS6KA2 PE=1 SV=2	93.58	1.03045
Q9BXL7	Caspase recruitment domain-containing protein 11 OS=Homo sapiens GN=CARD11 PE=1 SV=3	23.15	1.03045
Q00987	E3 ubiquitin-protein ligase Mdm2 OS=Homo sapiens GN=MDM2 PE=1 SV=1	35.97	1.04081
Q7Z4S6	Kinesin-like protein KIF21A OS=Homo sapiens GN=KIF21A PE=1 SV=2	44.37	1.04081
Q9NVI1	Fanconi anemia group I protein OS=Homo sapiens GN=FANCI PE=1 SV=4	73.93	1.04081
Q5SYB0	FERM and PDZ domain-containing protein 1 OS=Homo sapiens GN=FRMPD1 PE=1 SV=1	89.56	1.05127
Q6PJI9	WD repeat-containing protein 59 OS=Homo sapiens GN=WDR59 PE=1 SV=2	56.43	1.06184
Q8NDA8	Maestro heat-like repeat-containing protein family member 1 OS=Homo sapiens GN=MROH1 PE=2 SV=3	110.44	1.06184
Q13822	Ectonucleotide pyrophosphatase/phosphodiesterase family member 2 OS=Homo sapiens GN=ENPP2 PE=1 SV=3	19.47	1.08329
O60423	Phospholipid-transporting ATPase IK OS=Homo sapiens GN=ATP8B3 PE=2 SV=4	115	1.09417
O75976	Carboxypeptidase D OS=Homo sapiens GN=CPD PE=1 SV=2	37.03	1.10517
P62807	Histone H2B type 1-C/E/F/G/I OS=Homo sapiens GN=HIST1H2BC PE=1 SV=4	1685.17	1.10517
P02787	Serotransferrin OS=Homo sapiens GN=TF PE=1 SV=3	213.33	1.11628
Q93079	Histone H2B type 1-H OS=Homo sapiens GN=HIST1H2BH PE=1 SV=3	1685.17	1.1275
Q5JRA6	Melanoma inhibitory activity protein 3 OS=Homo sapiens GN=MIA3 PE=1 SV=1	68.81	1.1275
Q8IYB9	Zinc finger protein 595 OS=Homo sapiens GN=ZNF595 PE=2 SV=1	107.92	1.1275
A8MXY4	Zinc finger protein 99 OS=Homo sapiens GN=ZNF99 PE=2 SV=3	22.85	1.13883
Q96JK2	DDB1- and CUL4-associated factor 5 OS=Homo sapiens GN=DCAF5 PE=1 SV=2	105.27	1.13883
Q5T0Z8	Uncharacterized protein C6orf132 OS=Homo sapiens GN=C6orf132 PE=1 SV=4	38.48	1.15027
P58876	Histone H2B type 1-D OS=Homo sapiens GN=HIST1H2BD PE=1 SV=2	1685.17	1.16183
Q16778	Histone H2B type 2-E OS=Homo sapiens GN=HIST2H2BE PE=1 SV=3	1685.17	1.16183
Q5QNW6	Histone H2B type 2-F OS=Homo sapiens GN=HIST2H2BF PE=1 SV=3	1685.17	1.16183
Q14966	Zinc finger protein 638 OS=Homo sapiens GN=ZNF638 PE=1 SV=2	53.57	1.17351
P33778	Histone H2B type 1-B OS=Homo sapiens GN=HIST1H2BB PE=1 SV=2	1685.17	1.17351
P23527	Histone H2B type 1-O OS=Homo sapiens GN=HIST1H2BO PE=1 SV=3	1685.17	1.17351
Q99880	Histone H2B type 1-L OS=Homo sapiens GN=HIST1H2BL PE=1 SV=3	1413.62	1.17351
Q99877	Histone H2B type 1-N OS=Homo sapiens GN=HIST1H2BN PE=1 SV=3	1685.17	1.17351
O60814	Histone H2B type 1-K OS=Homo sapiens GN=HIST1H2BK PE=1 SV=3	1484.08	1.1853
Q5VVP1	Spermatogenesis-associated protein 31A6 OS=Homo sapiens GN=SPATA31A6 PE=3 SV=1	32.94	1.1853
P57053	Histone H2B type F-S OS=Homo sapiens GN=H2BFS PE=1 SV=2	1484.08	1.19722
Q5TZJ5	Spermatogenesis-associated protein 31A1 OS=Homo sapiens GN=SPATA31A1 PE=3 SV=1	71.43	1.19722
Q96NL3	Zinc finger protein 599 OS=Homo sapiens GN=ZNF599 PE=1 SV=1	52.65	1.19722
Q8N257	Histone H2B type 3-B OS=Homo sapiens GN=HIST3H2BB PE=1 SV=3	1413.62	1.19722
P06899	Histone H2B type 1-J OS=Homo sapiens GN=HIST1H2BJ PE=1 SV=3	1484.08	1.20925
P0CG47	Polyubiquitin-B OS=Homo sapiens GN=UBB PE=1 SV=1	1183.74	1.2214
Q92621	Nuclear pore complex protein Nup205 OS=Homo sapiens GN=NUP205 PE=1 SV=3	18.94	1.2214
P0CG48	Polyubiquitin-C OS=Homo sapiens GN=UBC PE=1 SV=3	1183.74	1.23368
P62987	Ubiquitin-60S ribosomal protein L40 OS=Homo sapiens GN=UBA52 PE=1 SV=2	1203.65	1.23368
P62979	Ubiquitin-40S ribosomal protein S27a OS=Homo sapiens GN=RPS27A PE=1 SV=2	1183.74	1.23368
P29317	Ephrin type-A receptor 2 OS=Homo sapiens GN=EPHA2 PE=1 SV=2	71.82	1.23368
Q2M3C7	A-kinase anchor protein SPHKAP OS=Homo sapiens GN=SPHKAP PE=1 SV=1	27.55	1.2586
P49756	RNA-binding protein 25 OS=Homo sapiens GN=RBM25 PE=1 SV=3	28.83	1.2586
Q8TEP8	Centrosomal protein of 192 kDa OS=Homo sapiens GN=CEP192 PE=1 SV=2	36.51	1.29693
P11021	78 kDa glucose-regulated protein OS=Homo sapiens GN=HSPA5 PE=1 SV=2	5.89	1.30996
Q71UI9	Histone H2A.V OS=Homo sapiens GN=H2AFV PE=1 SV=3	1417.9	1.30996
P0C0S5	Histone H2A.Z OS=Homo sapiens GN=H2AFZ PE=1 SV=2	1417.9	1.30996
Q5H9F3	BCL-6 corepressor-like protein 1 OS=Homo sapiens GN=BCORL1 PE=1 SV=1	46.99	1.34986
Q6DN14	Multiple C2 and transmembrane domain-containing protein 1 OS=Homo sapiens GN=MCTP1 PE=2 SV=2	67.59	1.39097
Q96PE2	Rho guanine nucleotide exchange factor 17 OS=Homo sapiens GN=ARHGEF17 PE=1 SV=1	25.13	1.39097
Q8IZU9	Kin of IRRE-like protein 3 OS=Homo sapiens GN=KIRREL3 PE=1 SV=1	38.52	1.41907
Q9UGU0	Transcription factor 20 OS=Homo sapiens GN=TCF20 PE=1 SV=3	25.47	1.44773
Q9NRD8	Dual oxidase 2 OS=Homo sapiens GN=DUOX2 PE=1 SV=2	50.86	1.47698
Q07075	Glutamyl aminopeptidase OS=Homo sapiens GN=ENPEP PE=1 SV=3	37.56	1.47698
O60437	Periplakin OS=Homo sapiens GN=PPL PE=1 SV=4	215.24	1.49182
O15083	ERC protein 2 OS=Homo sapiens GN=ERC2 PE=1 SV=3	31.2	1.52196
Q15022	Polycomb protein SUZ12 OS=Homo sapiens GN=SUZ12 PE=1 SV=3	69.87	1.53726
Q86VI3	Ras GTPase-activating-like protein IQGAP3 OS=Homo sapiens GN=IQGAP3 PE=1 SV=2	14.98	1.58407
Q9Y6X6	Unconventional myosin-XVI OS=Homo sapiens GN=MYO16 PE=2 SV=3	25.76	1.58407
Q93074	Mediator of RNA polymerase II transcription subunit 12 OS=Homo sapiens GN=MED12 PE=1 SV=4	19.29	1.64872
Q86XP1	Diacylglycerol kinase eta OS=Homo sapiens GN=DGKH PE=1 SV=1	18.75	1.66529
Q9Y4E8	Ubiquitin carboxyl-terminal hydrolase 15 OS=Homo sapiens GN=USP15 PE=1 SV=3	39.55	1.69893
Q8N7P7	Uncharacterized protein FLJ40521 OS=Homo sapiens PE=2 SV=1	64.88	1.73325
O95759	TBC1 domain family member 8 OS=Homo sapiens GN=TBC1D8 PE=2 SV=3	54.76	1.73325
Q9HCF6	Transient receptor potential cation channel subfamily M member 3 OS=Homo sapiens GN=TRPM3 PE=2 SV=4	35.3	1.80399
Q8WXG6	MAP kinase-activating death domain protein OS=Homo sapiens GN=MADD PE=1 SV=2	44.79	1.80399
Q96RP9	Elongation factor G, mitochondrial OS=Homo sapiens GN=GFM1 PE=1 SV=2	36.53	1.84043
Q5TB80	Centrosomal protein of 162 kDa OS=Homo sapiens GN=CEP162 PE=1 SV=2	74.6	1.84043
P10412	Histone H1.4 OS=Homo sapiens GN=HIST1H1E PE=1 SV=2	939.01	1.84043
Q8NEP3	Dynein assembly factor 1, axonemal OS=Homo sapiens GN=DNAAF1 PE=1 SV=5	69.68	1.85893
Q6P280	Zinc finger protein 529 OS=Homo sapiens GN=ZNF529 PE=2 SV=2	40.47	1.85893
Q8TEU7	Rap guanine nucleotide exchange factor 6 OS=Homo sapiens GN=RAPGEF6 PE=1 SV=2	26.13	1.85893
Q02539	Histone H1.1 OS=Homo sapiens GN=HIST1H1A PE=1 SV=3	75.29	1.89648
A2A2Z9	Ankyrin repeat domain-containing protein 18B OS=Homo sapiens GN=ANKRD18B PE=1 SV=1	24.39	1.89648
Q9Y6R4	Mitogen-activated protein kinase kinase kinase 4 OS=Homo sapiens GN=MAP3K4 PE=1 SV=2	17.25	1.95424
Q4ADV7	RAB6A-GEF complex partner protein 1 OS=Homo sapiens GN=RIC1 PE=1 SV=2	6.83	2.01375
Q04912	Macrophage-stimulating protein receptor OS=Homo sapiens GN=MST1R PE=1 SV=2	2.27	2.03399
Q8N9F8	Zinc finger protein 454 OS=Homo sapiens GN=ZNF454 PE=2 SV=2	186.62	2.09594
Q6UWJ1	Transmembrane and coiled-coil domain-containing protein 3 OS=Homo sapiens GN=TMCO3 PE=2 SV=1	158.96	2.15977
Q9UH90	F-box only protein 40 OS=Homo sapiens GN=FBXO40 PE=2 SV=2	95.69	2.15977
P16403	Histone H1.2 OS=Homo sapiens GN=HIST1H1C PE=1 SV=2	863.8	2.29332
P22492	Histone H1t OS=Homo sapiens GN=HIST1H1T PE=2 SV=4	56.6	2.31637
Q9Y2I7	1-phosphatidylinositol 3-phosphate 5-kinase OS=Homo sapiens GN=PIKFYVE PE=1 SV=3	47.95	2.55998
P53675	Clathrin heavy chain 2 OS=Homo sapiens GN=CLTCL1 PE=1 SV=2	30.05	2.6117
Q5T764	Interferon-induced protein with tetratricopeptide repeats 1B OS=Homo sapiens GN=IFIT1B PE=2 SV=1	114.97	2.85765
P0CG39	POTE ankyrin domain family member J OS=Homo sapiens GN=POTEJ PE=3 SV=1	222.16	2.97427
P63261	Actin, cytoplasmic 2 OS=Homo sapiens GN=ACTG1 PE=1 SV=1	1223.43	2.97427
A6NK75	Zinc finger protein 98 OS=Homo sapiens GN=ZNF98 PE=2 SV=4	6.48	3.06485
Q86XI2	Condensin-2 complex subunit G2 OS=Homo sapiens GN=NCAPG2 PE=1 SV=1	17.79	3.06485
P11142	Heat shock cognate 71 kDa protein OS=Homo sapiens GN=HSPA8 PE=1 SV=1	59.81	3.12677
Q9P255	Zinc finger protein 492 OS=Homo sapiens GN=ZNF492 PE=2 SV=2	30.28	3.12677
Q8N8A2	Serine/threonine-protein phosphatase 6 regulatory ankyrin repeat subunit B OS=Homo sapiens GN=ANKRD44 PE=1 SV=3	75.5	3.45561
P17927	Complement receptor type 1 OS=Homo sapiens GN=CR1 PE=1 SV=3	21.32	3.49034
A5A3E0	POTE ankyrin domain family member F OS=Homo sapiens GN=POTEF PE=1 SV=2	383.14	3.49034
Q562R1	Beta-actin-like protein 2 OS=Homo sapiens GN=ACTBL2 PE=1 SV=2	26.57	3.70617
P16885	1-phosphatidylinositol 4,5-bisphosphate phosphodiesterase gamma-2 OS=Homo sapiens GN=PLCG2 PE=1 SV=4	17.16	3.85743
O94875	Sorbin and SH3 domain-containing protein 2 OS=Homo sapiens GN=SORBS2 PE=1 SV=3	41.23	3.93535
Q7Z6B7	SLIT-ROBO Rho GTPase-activating protein 1 OS=Homo sapiens GN=SRGAP1 PE=1 SV=1	26.96	3.93535
Q8WZA1	Protein O-linked-mannose beta-1,2-N-acetylglucosaminyltransferase 1 OS=Homo sapiens GN=POMGNT1 PE=1 SV=2	76.36	3.9749
Q9UPS8	Ankyrin repeat domain-containing protein 26 OS=Homo sapiens GN=ANKRD26 PE=1 SV=3	54.24	4.01485
Q3T906	N-acetylglucosamine-1-phosphotransferase subunits alpha/beta OS=Homo sapiens GN=GNPTAB PE=1 SV=1	96.48	4.01485
Q99466	Neurogenic locus notch homolog protein 4 OS=Homo sapiens GN=NOTCH4 PE=1 SV=2	40.28	4.52673
Q8N5Q1	Protein FAM71E2 OS=Homo sapiens GN=FAM71E2 PE=2 SV=3	53.06	4.90375
Q6ZMV9	Kinesin-like protein KIF6 OS=Homo sapiens GN=KIF6 PE=1 SV=3	96.85	5.36556
P14625	Endoplasmin OS=Homo sapiens GN=HSP90B1 PE=1 SV=1	42.26	5.41948
Q92794	Histone acetyltransferase KAT6A OS=Homo sapiens GN=KAT6A PE=1 SV=2	19.26	5.87085
A6NMZ7	Collagen alpha-6(VI) chain OS=Homo sapiens GN=COL6A6 PE=1 SV=2	40.77	5.87085
Q9NS87	Kinesin-like protein KIF15 OS=Homo sapiens GN=KIF15 PE=1 SV=1	50.74	6.04965
P60709	Actin, cytoplasmic 1 OS=Homo sapiens GN=ACTB PE=1 SV=1	1223.43	6.82096
P68133	Actin, alpha skeletal muscle OS=Homo sapiens GN=ACTA1 PE=1 SV=1	851.24	6.82096
P63267	Actin, gamma-enteric smooth muscle OS=Homo sapiens GN=ACTG2 PE=1 SV=1	851.24	6.82096
P62736	Actin, aortic smooth muscle OS=Homo sapiens GN=ACTA2 PE=1 SV=1	851.24	6.82096
P68032	Actin, alpha cardiac muscle 1 OS=Homo sapiens GN=ACTC1 PE=1 SV=1	851.24	6.82096
P0CG38	POTE ankyrin domain family member I OS=Homo sapiens GN=POTEI PE=3 SV=1	380.81	9.97418
Q7L7L0	Histone H2A type 3 OS=Homo sapiens GN=HIST3H2A PE=1 SV=3	10327.5	10.1757
Q6FI13	Histone H2A type 2-A OS=Homo sapiens GN=HIST2H2AA3 PE=1 SV=3	982.89	10.4856
Q9BTM1	Histone H2A.J OS=Homo sapiens GN=H2AFJ PE=1 SV=1	10327.5	10.591
Q16777	Histone H2A type 2-C OS=Homo sapiens GN=HIST2H2AC PE=1 SV=4	982.89	10.8049
Q9P1Y6	PHD and RING finger domain-containing protein 1 OS=Homo sapiens GN=PHRF1 PE=1 SV=3	37.75	13.7357
Q96A08	Histone H2B type 1-A OS=Homo sapiens GN=HIST1H2BA PE=1 SV=3	566.18	24.0468
Q9Y3R0	Glutamate receptor-interacting protein 1 OS=Homo sapiens GN=GRIP1 PE=1 SV=3	16.73	26.5758
Q9NRJ7	Protocadherin beta-16 OS=Homo sapiens GN=PCDHB16 PE=1 SV=3	140.35	control_1
Q5JVX7	Uncharacterized protein C1orf141 OS=Homo sapiens GN=C1orf141 PE=2 SV=1	110.78	control_1
Q68CJ6	Nuclear GTPase SLIP-GC OS=Homo sapiens GN=NUGGC PE=2 SV=3	49.42	control_1
Q9NRI5	Disrupted in schizophrenia 1 protein OS=Homo sapiens GN=DISC1 PE=1 SV=3	32.8	control_1
Q15842	ATP-sensitive inward rectifier potassium channel 8 OS=Homo sapiens GN=KCNJ8 PE=1 SV=1	25.31	control_1
P98174	FYVE, RhoGEF and PH domain-containing protein 1 OS=Homo sapiens GN=FGD1 PE=1 SV=2	18.94	control_1
P55075	Fibroblast growth factor 8 OS=Homo sapiens GN=FGF8 PE=1 SV=1	85.1	control_1
P20810	Calpastatin OS=Homo sapiens GN=CAST PE=1 SV=4	168.52	control_1
O95551	Tyrosyl-DNA phosphodiesterase 2 OS=Homo sapiens GN=TDP2 PE=1 SV=1	7.21	control_1
Q6UXY1	Brain-specific angiogenesis inhibitor 1-associated protein 2-like protein 2 OS=Homo sapiens GN=BAIAP2L2 PE=1 SV=1	24.22	control_1
P16333	Cytoplasmic protein NCK1 OS=Homo sapiens GN=NCK1 PE=1 SV=1	6.9	control_1
Q99829	Copine-1 OS=Homo sapiens GN=CPNE1 PE=1 SV=1	15.5	control_1
Q13630	GDP-L-fucose synthase OS=Homo sapiens GN=TSTA3 PE=1 SV=1	33.08	control_1
P14136	Glial fibrillary acidic protein OS=Homo sapiens GN=GFAP PE=1 SV=1	103.42	control_1
Q86W56	Poly(ADP-ribose) glycohydrolase OS=Homo sapiens GN=PARG PE=1 SV=1	52.01	control_1
Q6UXV1	Izumo sperm-egg fusion protein 2 OS=Homo sapiens GN=IZUMO2 PE=2 SV=1	98.19	control_1
Q13619	Cullin-4A OS=Homo sapiens GN=CUL4A PE=1 SV=3	143.3	control_1
Q9BSJ8	Extended synaptotagmin-1 OS=Homo sapiens GN=ESYT1 PE=1 SV=1	72.4	control_1
Q9BSJ2	Gamma-tubulin complex component 2 OS=Homo sapiens GN=TUBGCP2 PE=1 SV=2	35.35	control_1
Q7KZ85	Transcription elongation factor SPT6 OS=Homo sapiens GN=SUPT6H PE=1 SV=2	24.88	control_1
Q96H72	Zinc transporter ZIP13 OS=Homo sapiens GN=SLC39A13 PE=1 SV=3	129.22	control_1
Q86W26	NACHT, LRR and PYD domains-containing protein 10 OS=Homo sapiens GN=NLRP10 PE=1 SV=1	19.12	control_1
Q9H2U1	ATP-dependent RNA helicase DHX36 OS=Homo sapiens GN=DHX36 PE=1 SV=2	75.62	control_1
Q9H361	Polyadenylate-binding protein 3 OS=Homo sapiens GN=PABPC3 PE=1 SV=2	42.44	control_1
Q9H2T7	Ran-binding protein 17 OS=Homo sapiens GN=RANBP17 PE=2 SV=1	5.8	control_1
P35452	Homeobox protein Hox-D12 OS=Homo sapiens GN=HOXD12 PE=1 SV=3	195.88	control_1
Q17RY0	Cytoplasmic polyadenylation element-binding protein 4 OS=Homo sapiens GN=CPEB4 PE=1 SV=1	164.11	control_1
Q3ZCT1	Zinc finger protein 260 OS=Homo sapiens GN=ZNF260 PE=1 SV=3	85.69	control_1
Q53G44	Interferon-induced protein 44-like OS=Homo sapiens GN=IFI44L PE=2 SV=3	41.15	control_1
Q6UY14	ADAMTS-like protein 4 OS=Homo sapiens GN=ADAMTSL4 PE=1 SV=2	45.95	control_1
Q6SJ93	Protein FAM111B OS=Homo sapiens GN=FAM111B PE=1 SV=1	33.37	control_1
P13682	Zinc finger protein 35 OS=Homo sapiens GN=ZNF35 PE=2 SV=4	6.43	control_1
Q96H15	T-cell immunoglobulin and mucin domain-containing protein 4 OS=Homo sapiens GN=TIMD4 PE=2 SV=2	10.91	control_1
P43004	Excitatory amino acid transporter 2 OS=Homo sapiens GN=SLC1A2 PE=1 SV=2	21.4	control_1
Q9NQZ8	Endothelial zinc finger protein induced by tumor necrosis factor alpha OS=Homo sapiens GN=ZNF71 PE=2 SV=1	41.44	control_1
Q494X3	Zinc finger protein 404 OS=Homo sapiens GN=ZNF404 PE=1 SV=2	50.97	control_1
Q8IUN9	C-type lectin domain family 10 member A OS=Homo sapiens GN=CLEC10A PE=2 SV=1	127.77	control_1
Q96GN5	Cell division cycle-associated 7-like protein OS=Homo sapiens GN=CDCA7L PE=1 SV=2	79.03	control_1
Q8WVE6	Transmembrane protein 171 OS=Homo sapiens GN=TMEM171 PE=1 SV=3	10.54	control_1
Q86VI4	Lysosomal-associated transmembrane protein 4B OS=Homo sapiens GN=LAPTM4B PE=1 SV=1	29.67	control_1
P87889	Endogenous retrovirus group K member 10 Gag polyprotein OS=Homo sapiens GN=ERVK-10 PE=1 SV=4	7.68	control_1
Q9NQX6	Zinc finger protein 331 OS=Homo sapiens GN=ZNF331 PE=1 SV=1	10.37	control_1
Q92797	Symplekin OS=Homo sapiens GN=SYMPK PE=1 SV=2	39.43	control_1
Q06481	Amyloid-like protein 2 OS=Homo sapiens GN=APLP2 PE=1 SV=2	49.67	control_1
Q6UXI9	Nephronectin OS=Homo sapiens GN=NPNT PE=2 SV=3	55.77	control_1
Q86VF2	Immunoglobulin-like and fibronectin type III domain-containing protein 1 OS=Homo sapiens GN=IGFN1 PE=1 SV=2	13.52	control_1
Q5GLZ8	Probable E3 ubiquitin-protein ligase HERC4 OS=Homo sapiens GN=HERC4 PE=1 SV=1	44.76	control_1
Q06455	Protein CBFA2T1 OS=Homo sapiens GN=RUNX1T1 PE=1 SV=2	7.79	control_1
Q86VD9	GPI mannosyltransferase 4 OS=Homo sapiens GN=PIGZ PE=2 SV=4	72.91	control_1
Q14031	Collagen alpha-6(IV) chain OS=Homo sapiens GN=COL4A6 PE=1 SV=3	63.45	control_1
Q96TA1	Niban-like protein 1 OS=Homo sapiens GN=FAM129B PE=1 SV=3	81.92	control_1
Q96TA0	Putative protocadherin beta-18 OS=Homo sapiens GN=PCDHB18P PE=5 SV=2	14.99	control_1
Q8NFZ4	Neuroligin-2 OS=Homo sapiens GN=NLGN2 PE=1 SV=1	130.41	control_1
Q8NFZ3	Neuroligin-4, Y-linked OS=Homo sapiens GN=NLGN4Y PE=2 SV=1	51.2	control_1
Q5VU92	DDB1- and CUL4-associated factor 12-like protein 1 OS=Homo sapiens GN=DCAF12L1 PE=1 SV=1	58.38	control_1
Q96GE4	Centrosomal protein of 95 kDa OS=Homo sapiens GN=CEP95 PE=1 SV=1	40.36	control_1
P32754	4-hydroxyphenylpyruvate dioxygenase OS=Homo sapiens GN=HPD PE=1 SV=2	24.85	control_1
Q14003	Potassium voltage-gated channel subfamily C member 3 OS=Homo sapiens GN=KCNC3 PE=1 SV=3	72.18	control_1
Q02040	A-kinase anchor protein 17A OS=Homo sapiens GN=AKAP17A PE=1 SV=2	26.78	control_1
Q9H2C0	Gigaxonin OS=Homo sapiens GN=GAN PE=1 SV=1	16.76	control_1
Q8IUC4	Rhophilin-2 OS=Homo sapiens GN=RHPN2 PE=1 SV=1	16.63	control_1
F5H4A9	Uncharacterized membrane protein C3orf80 OS=Homo sapiens GN=C3orf80 PE=2 SV=1	15.24	control_1
Q8NG68	Tubulin--tyrosine ligase OS=Homo sapiens GN=TTL PE=1 SV=2	125.92	control_1
Q8IUA7	ATP-binding cassette sub-family A member 9 OS=Homo sapiens GN=ABCA9 PE=1 SV=1	18.54	control_1
Q05996	Zona pellucida sperm-binding protein 2 OS=Homo sapiens GN=ZP2 PE=2 SV=1	31.65	control_1
Q8NG57	RNA polymerase II transcription factor SIII subunit A3 OS=Homo sapiens GN=TCEB3C PE=1 SV=2	24.79	control_1
P06493	Cyclin-dependent kinase 1 OS=Homo sapiens GN=CDK1 PE=1 SV=3	226.89	control_1
Q15750	TGF-beta-activated kinase 1 and MAP3K7-binding protein 1 OS=Homo sapiens GN=TAB1 PE=1 SV=1	40.65	control_1
P51878	Caspase-5 OS=Homo sapiens GN=CASP5 PE=1 SV=3	80.91	control_1
Q5T9A4	ATPase family AAA domain-containing protein 3B OS=Homo sapiens GN=ATAD3B PE=1 SV=1	120.58	control_1
Q659A1	Little elongation complex subunit 2 OS=Homo sapiens GN=ICE2 PE=1 SV=2	142.46	control_1
Q8NFR7	Coiled-coil domain-containing protein 148 OS=Homo sapiens GN=CCDC148 PE=1 SV=2	178.15	control_1
Q8WUT4	Leucine-rich repeat neuronal protein 4 OS=Homo sapiens GN=LRRN4 PE=2 SV=3	5.63	control_1
Q49AA0	Zinc finger protein ZFP69 OS=Homo sapiens GN=ZFP69 PE=2 SV=2	67.99	control_1
Q17RC7	Exocyst complex component 3-like protein 4 OS=Homo sapiens GN=EXOC3L4 PE=1 SV=2	13.24	control_1
Q5M8T2	Solute carrier family 35 member D3 OS=Homo sapiens GN=SLC35D3 PE=2 SV=1	80.31	control_1
Q8NFQ8	Torsin-1A-interacting protein 2 OS=Homo sapiens GN=TOR1AIP2 PE=1 SV=1	17.67	control_1
Q8NFQ6	BPI fold-containing family C protein OS=Homo sapiens GN=BPIFC PE=2 SV=1	299.58	control_1
P0CG43	Putative protein FAM157C OS=Homo sapiens GN=FAM157C PE=3 SV=1	82.93	control_1
P0CG42	Putative protein FAM157B OS=Homo sapiens GN=FAM157B PE=3 SV=1	23.46	control_1
Q9BRN9	TM2 domain-containing protein 3 OS=Homo sapiens GN=TM2D3 PE=2 SV=2	22.48	control_1
Q13554	Calcium/calmodulin-dependent protein kinase type II subunit beta OS=Homo sapiens GN=CAMK2B PE=1 SV=3	37.13	control_1
Q86V87	Protein FAM160B2 OS=Homo sapiens GN=FAM160B2 PE=2 SV=2	141.46	control_1
Q15722	Leukotriene B4 receptor 1 OS=Homo sapiens GN=LTB4R PE=1 SV=2	25.56	control_1
Q13547	Histone deacetylase 1 OS=Homo sapiens GN=HDAC1 PE=1 SV=1	9.22	control_1
Q3MJ16	Cytosolic phospholipase A2 epsilon OS=Homo sapiens GN=PLA2G4E PE=2 SV=3	55.67	control_1
P51841	Retinal guanylyl cyclase 2 OS=Homo sapiens GN=GUCY2F PE=2 SV=2	28.6	control_1
Q05932	Folylpolyglutamate synthase, mitochondrial OS=Homo sapiens GN=FPGS PE=1 SV=3	57.4	control_1
P29973	cGMP-gated cation channel alpha-1 OS=Homo sapiens GN=CNGA1 PE=1 SV=3	20.69	control_1
Q99707	Methionine synthase OS=Homo sapiens GN=MTR PE=1 SV=2	23.63	control_1
Q6UWV6	Ectonucleotide pyrophosphatase/phosphodiesterase family member 7 OS=Homo sapiens GN=ENPP7 PE=1 SV=3	143.5	control_1
Q96SQ9	Cytochrome P450 2S1 OS=Homo sapiens GN=CYP2S1 PE=1 SV=2	65.42	control_1
P08603	Complement factor H OS=Homo sapiens GN=CFH PE=1 SV=4	38.35	control_1
Q9NQC3	Reticulon-4 OS=Homo sapiens GN=RTN4 PE=1 SV=2	80.81	control_1
Q01546	Keratin, type II cytoskeletal 2 oral OS=Homo sapiens GN=KRT76 PE=1 SV=2	14.87	control_1
P35368	Alpha-1B adrenergic receptor OS=Homo sapiens GN=ADRA1B PE=1 SV=3	105.26	control_1
O75843	AP-1 complex subunit gamma-like 2 OS=Homo sapiens GN=AP1G2 PE=1 SV=1	43.59	control_1
Q49A92	Uncharacterized protein C8orf34 OS=Homo sapiens GN=C8orf34 PE=2 SV=2	107.82	control_1
Q1X8D7	Leucine-rich repeat-containing protein 36 OS=Homo sapiens GN=LRRC36 PE=2 SV=2	13.9	control_1
Q49A88	Coiled-coil domain-containing protein 14 OS=Homo sapiens GN=CCDC14 PE=1 SV=3	151.55	control_1
Q969Z4	Tumor necrosis factor receptor superfamily member 19L OS=Homo sapiens GN=RELT PE=1 SV=1	31.06	control_1
Q53ET0	CREB-regulated transcription coactivator 2 OS=Homo sapiens GN=CRTC2 PE=1 SV=2	7.58	control_1
Q6UWP7	Lysocardiolipin acyltransferase 1 OS=Homo sapiens GN=LCLAT1 PE=1 SV=1	54.47	control_1
P23378	Glycine dehydrogenase (decarboxylating), mitochondrial OS=Homo sapiens GN=GLDC PE=1 SV=2	168.59	control_1
P17948	Vascular endothelial growth factor receptor 1 OS=Homo sapiens GN=FLT1 PE=1 SV=2	23.29	control_1
O94983	Calmodulin-binding transcription activator 2 OS=Homo sapiens GN=CAMTA2 PE=1 SV=3	2.61	control_1
O94979	Protein transport protein Sec31A OS=Homo sapiens GN=SEC31A PE=1 SV=3	43	control_1
Q969V6	MKL/myocardin-like protein 1 OS=Homo sapiens GN=MKL1 PE=1 SV=1	19.92	control_1
Q6UWM9	UDP-glucuronosyltransferase 2A3 OS=Homo sapiens GN=UGT2A3 PE=2 SV=2	4.08	control_1
Q49A33	Putative zinc finger protein 876 OS=Homo sapiens GN=ZNF876P PE=5 SV=3	105.09	control_1
O94967	WD repeat-containing protein 47 OS=Homo sapiens GN=WDR47 PE=1 SV=1	1.2	control_1
O94953	Lysine-specific demethylase 4B OS=Homo sapiens GN=KDM4B PE=1 SV=4	102.44	control_1
Q92698	DNA repair and recombination protein RAD54-like OS=Homo sapiens GN=RAD54L PE=1 SV=2	18.98	control_1
P56645	Period circadian protein homolog 3 OS=Homo sapiens GN=PER3 PE=1 SV=4	20.01	control_1
Q969S8	Histone deacetylase 10 OS=Homo sapiens GN=HDAC10 PE=1 SV=1	45.9	control_1
P09067	Homeobox protein Hox-B5 OS=Homo sapiens GN=HOXB5 PE=1 SV=3	38.31	control_1
Q6P2P2	Putative protein arginine N-methyltransferase 9 OS=Homo sapiens GN=PRMT9 PE=2 SV=1	22.65	control_1
Q9H1K4	Mitochondrial glutamate carrier 2 OS=Homo sapiens GN=SLC25A18 PE=1 SV=1	74.69	control_1
Q92670	Putative zinc finger protein 75C OS=Homo sapiens GN=ZNF75CP PE=5 SV=2	25.03	control_1
O94923	D-glucuronyl C5-epimerase OS=Homo sapiens GN=GLCE PE=1 SV=3	18.53	control_1
O94921	Cyclin-dependent kinase 14 OS=Homo sapiens GN=CDK14 PE=1 SV=3	27.05	control_1
P13521	Secretogranin-2 OS=Homo sapiens GN=SCG2 PE=1 SV=2	44.71	control_1
Q96SC8	Doublesex- and mab-3-related transcription factor A2 OS=Homo sapiens GN=DMRTA2 PE=2 SV=2	404.8	control_1
O94911	ATP-binding cassette sub-family A member 8 OS=Homo sapiens GN=ABCA8 PE=1 SV=3	4.63	control_1
Q96SB8	Structural maintenance of chromosomes protein 6 OS=Homo sapiens GN=SMC6 PE=1 SV=2	167.49	control_1
O94906	Pre-mRNA-processing factor 6 OS=Homo sapiens GN=PRPF6 PE=1 SV=1	33.32	control_1
Q5H9R4	Armadillo repeat-containing X-linked protein 4 OS=Homo sapiens GN=ARMCX4 PE=2 SV=2	78.66	control_1
Q969N2	GPI transamidase component PIG-T OS=Homo sapiens GN=PIGT PE=1 SV=1	24.65	control_1
Q86UB9	Transmembrane protein 135 OS=Homo sapiens GN=TMEM135 PE=2 SV=2	40.88	control_1
Q92628	Uncharacterized protein KIAA0232 OS=Homo sapiens GN=KIAA0232 PE=1 SV=5	34.49	control_1
Q08AF3	Schlafen family member 5 OS=Homo sapiens GN=SLFN5 PE=1 SV=1	29.44	control_1
Q96FC9	Probable ATP-dependent RNA helicase DDX11 OS=Homo sapiens GN=DDX11 PE=1 SV=1	100.19	control_1
Q9UPX6	UPF0258 protein KIAA1024 OS=Homo sapiens GN=KIAA1024 PE=2 SV=3	144.44	control_1
Q8NEV4	Myosin-IIIa OS=Homo sapiens GN=MYO3A PE=2 SV=2	31.29	control_1
P81133	Single-minded homolog 1 OS=Homo sapiens GN=SIM1 PE=2 SV=2	13.78	control_1
Q969H0	F-box/WD repeat-containing protein 7 OS=Homo sapiens GN=FBXW7 PE=1 SV=1	69.17	control_1
Q5H9J9	T-complex protein 11 X-linked protein 2 OS=Homo sapiens GN=TCP11X2 PE=3 SV=1	92.73	control_1
Q9BR39	Junctophilin-2 OS=Homo sapiens GN=JPH2 PE=1 SV=2	12.23	control_1
P08581	Hepatocyte growth factor receptor OS=Homo sapiens GN=MET PE=1 SV=4	57.15	control_1
Q9UPV7	PHD finger protein 24 OS=Homo sapiens GN=PHF24 PE=1 SV=2	47.21	control_1
Q9UQ72	Pregnancy-specific beta-1-glycoprotein 11 OS=Homo sapiens GN=PSG11 PE=2 SV=3	111.61	control_1
O95391	Pre-mRNA-splicing factor SLU7 OS=Homo sapiens GN=SLU7 PE=1 SV=2	24.74	control_1
P40200	T-cell surface protein tactile OS=Homo sapiens GN=CD96 PE=1 SV=2	214.07	control_1
Q56NI9	N-acetyltransferase ESCO2 OS=Homo sapiens GN=ESCO2 PE=1 SV=1	23.64	control_1
Q969F9	Hermansky-Pudlak syndrome 3 protein OS=Homo sapiens GN=HPS3 PE=1 SV=1	47.3	control_1
P20648	Potassium-transporting ATPase alpha chain 1 OS=Homo sapiens GN=ATP4A PE=2 SV=5	14.62	control_1
Q86TZ1	Tetratricopeptide repeat protein 6 OS=Homo sapiens GN=TTC6 PE=2 SV=1	46.48	control_1
Q15650	Activating signal cointegrator 1 OS=Homo sapiens GN=TRIP4 PE=1 SV=4	109.01	control_1
Q9UPT9	Ubiquitin carboxyl-terminal hydrolase 22 OS=Homo sapiens GN=USP22 PE=1 SV=2	124.03	control_1
Q9UPT8	Zinc finger CCCH domain-containing protein 4 OS=Homo sapiens GN=ZC3H4 PE=1 SV=3	5.44	control_1
O95377	Gap junction beta-5 protein OS=Homo sapiens GN=GJB5 PE=2 SV=2	68.59	control_1
Q9UQ53	Alpha-1,3-mannosyl-glycoprotein 4-beta-N-acetylglucosaminyltransferase B OS=Homo sapiens GN=MGAT4B PE=1 SV=1	124.35	control_1
Q8N998	Coiled-coil domain-containing protein 89 OS=Homo sapiens GN=CCDC89 PE=2 SV=1	35.67	control_1
Q5JTV8	Torsin-1A-interacting protein 1 OS=Homo sapiens GN=TOR1AIP1 PE=1 SV=2	50.5	control_1
Q13451	Peptidyl-prolyl cis-trans isomerase FKBP5 OS=Homo sapiens GN=FKBP5 PE=1 SV=2	110.79	control_1
Q9BQN1	Protein FAM83C OS=Homo sapiens GN=FAM83C PE=1 SV=3	193.37	control_1
Q8WTR7	Zinc finger protein 473 OS=Homo sapiens GN=ZNF473 PE=1 SV=1	23.4	control_1
O95352	Ubiquitin-like modifier-activating enzyme ATG7 OS=Homo sapiens GN=ATG7 PE=1 SV=1	80.88	control_1
Q6F5E8	Leucine-rich repeat-containing protein 16C OS=Homo sapiens GN=RLTPR PE=1 SV=2	46.95	control_1
Q96RT8	Gamma-tubulin complex component 5 OS=Homo sapiens GN=TUBGCP5 PE=1 SV=1	84.22	control_1
Q155Q3	Dixin OS=Homo sapiens GN=DIXDC1 PE=1 SV=2	44.9	control_1
Q96RT1	Protein LAP2 OS=Homo sapiens GN=ERBB2IP PE=1 SV=2	15.28	control_1
O75795	UDP-glucuronosyltransferase 2B17 OS=Homo sapiens GN=UGT2B17 PE=1 SV=1	5.86	control_1
P49448	Glutamate dehydrogenase 2, mitochondrial OS=Homo sapiens GN=GLUD2 PE=1 SV=2	187.12	control_1
Q9UQ26	Regulating synaptic membrane exocytosis protein 2 OS=Homo sapiens GN=RIMS2 PE=1 SV=2	49.37	control_1
Q9UPQ3	Arf-GAP with GTPase, ANK repeat and PH domain-containing protein 1 OS=Homo sapiens GN=AGAP1 PE=1 SV=4	37.78	control_1
Q8N8U9	BMP-binding endothelial regulator protein OS=Homo sapiens GN=BMPER PE=1 SV=3	57.88	control_1
Q9UQ05	Potassium voltage-gated channel subfamily H member 4 OS=Homo sapiens GN=KCNH4 PE=2 SV=1	63.15	control_1
Q8NEM0	Microcephalin OS=Homo sapiens GN=MCPH1 PE=1 SV=3	26.51	control_1
Q9UPN7	Serine/threonine-protein phosphatase 6 regulatory subunit 1 OS=Homo sapiens GN=PPP6R1 PE=1 SV=5	12.83	control_1
Q9UPN6	Protein SCAF8 OS=Homo sapiens GN=SCAF8 PE=1 SV=1	74.45	control_1
Q96F86	Enhancer of mRNA-decapping protein 3 OS=Homo sapiens GN=EDC3 PE=1 SV=1	55.65	control_1
Q86U38	Nucleolar protein 9 OS=Homo sapiens GN=NOP9 PE=1 SV=1	75.65	control_1
Q9NPB9	Atypical chemokine receptor 4 OS=Homo sapiens GN=ACKR4 PE=1 SV=1	82.26	control_1
Q93052	Lipoma-preferred partner OS=Homo sapiens GN=LPP PE=1 SV=1	83.55	control_1
A8MT19	Putative rhophilin-2-like protein RHPN2P1 OS=Homo sapiens GN=RHPN2P1 PE=5 SV=2	41.43	control_1
Q6ZUB1	Spermatogenesis-associated protein 31E1 OS=Homo sapiens GN=SPATA31E1 PE=2 SV=2	55.17	control_1
Q93033	Immunoglobulin superfamily member 2 OS=Homo sapiens GN=CD101 PE=1 SV=2	11.29	control_1
P78345	Ribonuclease P protein subunit p38 OS=Homo sapiens GN=RPP38 PE=1 SV=2	70.89	control_1
Q9H147	Deoxynucleotidyltransferase terminal-interacting protein 1 OS=Homo sapiens GN=DNTTIP1 PE=1 SV=2	49.23	control_1
P35240	Merlin OS=Homo sapiens GN=NF2 PE=1 SV=1	62.66	control_1
Q2KHM9	Protein moonraker OS=Homo sapiens GN=KIAA0753 PE=1 SV=3	25.5	control_1
P35237	Serpin B6 OS=Homo sapiens GN=SERPINB6 PE=1 SV=3	26.48	control_1
Q96ER9	Coiled-coil domain-containing protein 51 OS=Homo sapiens GN=CCDC51 PE=1 SV=2	153.98	control_1
Q8NEG7	Protein DENND6B OS=Homo sapiens GN=DENND6B PE=2 SV=1	2.3	control_1
O94898	Leucine-rich repeats and immunoglobulin-like domains protein 2 OS=Homo sapiens GN=LRIG2 PE=2 SV=3	155.5	control_1
Q96RK4	Bardet-Biedl syndrome 4 protein OS=Homo sapiens GN=BBS4 PE=1 SV=2	85.98	control_1
P35228	Nitric oxide synthase, inducible OS=Homo sapiens GN=NOS2 PE=1 SV=2	12.62	control_1
Q96EQ8	E3 ubiquitin-protein ligase RNF125 OS=Homo sapiens GN=RNF125 PE=1 SV=4	116.57	control_1
P78314	SH3 domain-binding protein 2 OS=Homo sapiens GN=SH3BP2 PE=1 SV=2	21.47	control_1
P35212	Gap junction alpha-4 protein OS=Homo sapiens GN=GJA4 PE=1 SV=3	24.51	control_1
Q8NEC7	Glutathione S-transferase C-terminal domain-containing protein OS=Homo sapiens GN=GSTCD PE=1 SV=2	12.71	control_1
Q9UPE1	SRSF protein kinase 3 OS=Homo sapiens GN=SRPK3 PE=1 SV=2	154.14	control_1
Q08477	Docosahexaenoic acid omega-hydroxylase CYP4F3 OS=Homo sapiens GN=CYP4F3 PE=1 SV=2	93.72	control_1
O94856	Neurofascin OS=Homo sapiens GN=NFASC PE=1 SV=4	47.43	control_1
Q5T7P8	Synaptotagmin-6 OS=Homo sapiens GN=SYT6 PE=1 SV=3	132.4	control_1
Q9NP73	Putative bifunctional UDP-N-acetylglucosamine transferase and deubiquitinase ALG13 OS=Homo sapiens GN=ALG13 PE=1 SV=2	48.53	control_1
Q12913	Receptor-type tyrosine-protein phosphatase eta OS=Homo sapiens GN=PTPRJ PE=1 SV=3	55.38	control_1
Q92569	Phosphatidylinositol 3-kinase regulatory subunit gamma OS=Homo sapiens GN=PIK3R3 PE=1 SV=2	66.99	control_1
Q9NP60	X-linked interleukin-1 receptor accessory protein-like 2 OS=Homo sapiens GN=IL1RAPL2 PE=2 SV=1	44.18	control_1
O94819	Kelch repeat and BTB domain-containing protein 11 OS=Homo sapiens GN=KBTBD11 PE=1 SV=1	89.91	control_1
Q6ZU67	BEN domain-containing protein 4 OS=Homo sapiens GN=BEND4 PE=2 SV=3	66.52	control_1
O94808	Glutamine--fructose-6-phosphate aminotransferase [isomerizing] 2 OS=Homo sapiens GN=GFPT2 PE=1 SV=3	40.78	control_1
Q92539	Phosphatidate phosphatase LPIN2 OS=Homo sapiens GN=LPIN2 PE=1 SV=1	7.11	control_1
Q6ZTQ4	Cadherin-related family member 3 OS=Homo sapiens GN=CDHR3 PE=1 SV=1	149.89	control_1
Q06210	Glutamine--fructose-6-phosphate aminotransferase [isomerizing] 1 OS=Homo sapiens GN=GFPT1 PE=1 SV=3	157.35	control_1
P20592	Interferon-induced GTP-binding protein Mx2 OS=Homo sapiens GN=MX2 PE=1 SV=1	80.92	control_1
Q9H0D2	Zinc finger protein 541 OS=Homo sapiens GN=ZNF541 PE=2 SV=3	47.28	control_1
P20591	Interferon-induced GTP-binding protein Mx1 OS=Homo sapiens GN=MX1 PE=1 SV=4	43.11	control_1
Q8NDX1	PH and SEC7 domain-containing protein 4 OS=Homo sapiens GN=PSD4 PE=1 SV=2	77.53	control_1
Q6NV74	Uncharacterized protein KIAA1211-like OS=Homo sapiens GN=KIAA1211L PE=2 SV=3	100.59	control_1
Q92502	StAR-related lipid transfer protein 8 OS=Homo sapiens GN=STARD8 PE=1 SV=2	96.21	control_1
Q6IWH7	Anoctamin-7 OS=Homo sapiens GN=ANO7 PE=1 SV=2	21.75	control_1
Q9H0C8	Integrin-linked kinase-associated serine/threonine phosphatase 2C OS=Homo sapiens GN=ILKAP PE=1 SV=1	35.62	control_1
Q9H0B3	Uncharacterized protein KIAA1683 OS=Homo sapiens GN=KIAA1683 PE=1 SV=1	37.2	control_1
Q15583	Homeobox protein TGIF1 OS=Homo sapiens GN=TGIF1 PE=1 SV=3	238.47	control_1
Q15572	TATA box-binding protein-associated factor RNA polymerase I subunit C OS=Homo sapiens GN=TAF1C PE=1 SV=2	43.07	control_1
Q13395	Probable methyltransferase TARBP1 OS=Homo sapiens GN=TARBP1 PE=1 SV=1	42.53	control_1
Q9BQ31	Potassium voltage-gated channel subfamily S member 3 OS=Homo sapiens GN=KCNS3 PE=1 SV=3	135.44	control_1
Q8NDT2	Putative RNA-binding protein 15B OS=Homo sapiens GN=RBM15B PE=1 SV=3	271.45	control_1
P51687	Sulfite oxidase, mitochondrial OS=Homo sapiens GN=SUOX PE=1 SV=2	80.11	control_1
P84996	Protein ALEX OS=Homo sapiens GN=GNAS PE=1 SV=1	30.91	control_1
Q32MQ0	Zinc finger protein 750 OS=Homo sapiens GN=ZNF750 PE=1 SV=1	41.97	control_1
Q5TCY1	Tau-tubulin kinase 1 OS=Homo sapiens GN=TTBK1 PE=1 SV=2	55	control_1
Q15542	Transcription initiation factor TFIID subunit 5 OS=Homo sapiens GN=TAF5 PE=1 SV=3	15.69	control_1
Q8N7X1	RNA-binding motif protein, X-linked-like-3 OS=Homo sapiens GN=RBMXL3 PE=2 SV=2	11.6	control_1
O95267	RAS guanyl-releasing protein 1 OS=Homo sapiens GN=RASGRP1 PE=1 SV=2	94.45	control_1
Q99549	M-phase phosphoprotein 8 OS=Homo sapiens GN=MPHOSPH8 PE=1 SV=2	28.77	control_1
O95260	Arginyl-tRNA--protein transferase 1 OS=Homo sapiens GN=ATE1 PE=1 SV=2	84.57	control_1
O95256	Interleukin-18 receptor accessory protein OS=Homo sapiens GN=IL18RAP PE=1 SV=1	50.63	control_1
Q13349	Integrin alpha-D OS=Homo sapiens GN=ITGAD PE=1 SV=2	34.16	control_1
Q8NE09	Regulator of G-protein signaling 22 OS=Homo sapiens GN=RGS22 PE=1 SV=3	24.18	control_1
Q6MZZ7	Calpain-13 OS=Homo sapiens GN=CAPN13 PE=1 SV=2	91.07	control_1
P10721	Mast/stem cell growth factor receptor Kit OS=Homo sapiens GN=KIT PE=1 SV=1	18.49	control_1
Q13332	Receptor-type tyrosine-protein phosphatase S OS=Homo sapiens GN=PTPRS PE=1 SV=3	57.59	control_1
Q96DY7	Mdm2-binding protein OS=Homo sapiens GN=MTBP PE=1 SV=1	46.21	control_1
Q4W5N1	Putative ATP-binding cassette sub-family A member 11 OS=Homo sapiens GN=ABCA11P PE=2 SV=1	156.91	control_1
P0C7V9	Putative methyltransferase-like protein 15P1 OS=Homo sapiens GN=METTL15P1 PE=5 SV=1	140.54	control_1
P0C7V5	Putative zinc finger protein 812 OS=Homo sapiens GN=ZNF812 PE=5 SV=1	242.88	control_1
Q96DX4	RING finger and SPRY domain-containing protein 1 OS=Homo sapiens GN=RSPRY1 PE=1 SV=1	18.62	control_1
Q99501	GAS2-like protein 1 OS=Homo sapiens GN=GAS2L1 PE=1 SV=2	111.94	control_1
Q8N841	Tubulin polyglutamylase TTLL6 OS=Homo sapiens GN=TTLL6 PE=1 SV=2	61.45	control_1
Q5JSP0	FYVE, RhoGEF and PH domain-containing protein 3 OS=Homo sapiens GN=FGD3 PE=1 SV=1	50.99	control_1
Q86T24	Transcriptional regulator Kaiso OS=Homo sapiens GN=ZBTB33 PE=1 SV=2	44.37	control_1
Q86SP6	Probable G-protein coupled receptor 149 OS=Homo sapiens GN=GPR149 PE=2 SV=2	3.01	control_1
Q8N801	Uncharacterized protein C2orf61 OS=Homo sapiens GN=C2orf61 PE=2 SV=2	20.43	control_1
P04003	C4b-binding protein alpha chain OS=Homo sapiens GN=C4BPA PE=1 SV=2	81.07	control_1
P27540	Aryl hydrocarbon receptor nuclear translocator OS=Homo sapiens GN=ARNT PE=1 SV=1	59.54	control_1
A4D2B8	Putative postmeiotic segregation increased 2-like protein 1 OS=Homo sapiens GN=PMS2P1 PE=5 SV=1	114.14	control_1
Q9UC07	Zinc finger protein 69 OS=Homo sapiens GN=ZNF69 PE=1 SV=2	81.57	control_1
Q9UC06	Zinc finger protein 70 OS=Homo sapiens GN=ZNF70 PE=2 SV=2	9.88	control_1
Q12887	Protoheme IX farnesyltransferase, mitochondrial OS=Homo sapiens GN=COX10 PE=1 SV=3	79.61	control_1
O94788	Retinal dehydrogenase 2 OS=Homo sapiens GN=ALDH1A2 PE=1 SV=3	27.4	control_1
Q9H013	Disintegrin and metalloproteinase domain-containing protein 19 OS=Homo sapiens GN=ADAM19 PE=1 SV=3	19.43	control_1
Q7LDI9	Endogenous retrovirus group K member 6 Gag polyprotein OS=Homo sapiens GN=ERVK-6 PE=1 SV=3	7.68	control_1
Q6PJG2	ELM2 and SANT domain-containing protein 1 OS=Homo sapiens GN=ELMSAN1 PE=1 SV=2	200.52	control_1
P13378	Homeobox protein Hox-D8 OS=Homo sapiens GN=HOXD8 PE=2 SV=2	46.79	control_1
P07951	Tropomyosin beta chain OS=Homo sapiens GN=TPM2 PE=1 SV=1	161.38	control_1
Q12860	Contactin-1 OS=Homo sapiens GN=CNTN1 PE=1 SV=1	51.1	control_1
Q8NDD1	Uncharacterized protein C1orf131 OS=Homo sapiens GN=C1orf131 PE=1 SV=3	4.1	control_1
P54289	Voltage-dependent calcium channel subunit alpha-2/delta-1 OS=Homo sapiens GN=CACNA2D1 PE=1 SV=3	9.64	control_1
Q6ZSZ6	Teashirt homolog 1 OS=Homo sapiens GN=TSHZ1 PE=2 SV=2	61.98	control_1
Q96DN5	TBC1 domain family member 31 OS=Homo sapiens GN=TBC1D31 PE=2 SV=2	52.36	control_1
Q7LDG7	RAS guanyl-releasing protein 2 OS=Homo sapiens GN=RASGRP2 PE=1 SV=1	47.05	control_1
Q12849	G-rich sequence factor 1 OS=Homo sapiens GN=GRSF1 PE=1 SV=3	8.01	control_1
P17706	Tyrosine-protein phosphatase non-receptor type 2 OS=Homo sapiens GN=PTPN2 PE=1 SV=2	32.72	control_1
Q9UBJ2	ATP-binding cassette sub-family D member 2 OS=Homo sapiens GN=ABCD2 PE=1 SV=1	129.26	control_1
Q12834	Cell division cycle protein 20 homolog OS=Homo sapiens GN=CDC20 PE=1 SV=2	86.48	control_1
Q00872	Myosin-binding protein C, slow-type OS=Homo sapiens GN=MYBPC1 PE=1 SV=2	30.04	control_1
P36871	Phosphoglucomutase-1 OS=Homo sapiens GN=PGM1 PE=1 SV=3	25.27	control_1
Q6ZT52	Protein FAM43B OS=Homo sapiens GN=FAM43B PE=2 SV=1	470.96	control_1
Q9UBF1	Melanoma-associated antigen C2 OS=Homo sapiens GN=MAGEC2 PE=1 SV=1	9.27	control_1
Q06136	3-ketodihydrosphingosine reductase OS=Homo sapiens GN=KDSR PE=1 SV=1	68.14	control_1
Q6ZSR9	Uncharacterized protein FLJ45252 OS=Homo sapiens PE=2 SV=2	238.98	control_1
P22695	Cytochrome b-c1 complex subunit 2, mitochondrial OS=Homo sapiens GN=UQCRC2 PE=1 SV=3	29.11	control_1
Q3KQU3	MAP7 domain-containing protein 1 OS=Homo sapiens GN=MAP7D1 PE=1 SV=1	22.94	control_1
P22670	MHC class II regulatory factor RFX1 OS=Homo sapiens GN=RFX1 PE=1 SV=2	63.17	control_1
Q6ZT07	TBC1 domain family member 9 OS=Homo sapiens GN=TBC1D9 PE=2 SV=2	41.02	control_1
O76041	Nebulette OS=Homo sapiens GN=NEBL PE=1 SV=1	14.45	control_1
P67936	Tropomyosin alpha-4 chain OS=Homo sapiens GN=TPM4 PE=1 SV=3	609.88	control_1
O76039	Cyclin-dependent kinase-like 5 OS=Homo sapiens GN=CDKL5 PE=1 SV=1	10.19	control_1
Q07890	Son of sevenless homolog 2 OS=Homo sapiens GN=SOS2 PE=1 SV=2	28.08	control_1
Q8ND71	GTPase IMAP family member 8 OS=Homo sapiens GN=GIMAP8 PE=2 SV=2	2.37	control_1
Q9GZZ6	Neuronal acetylcholine receptor subunit alpha-10 OS=Homo sapiens GN=CHRNA10 PE=1 SV=1	54.27	control_1
Q07889	Son of sevenless homolog 1 OS=Homo sapiens GN=SOS1 PE=1 SV=1	75.41	control_1
O76021	Ribosomal L1 domain-containing protein 1 OS=Homo sapiens GN=RSL1D1 PE=1 SV=3	53.77	control_1
Q5XG92	Carboxylesterase 4A OS=Homo sapiens GN=CES4A PE=2 SV=2	40.21	control_1
O15553	Pyrin OS=Homo sapiens GN=MEFV PE=1 SV=1	56.64	control_1
O60942	mRNA-capping enzyme OS=Homo sapiens GN=RNGTT PE=1 SV=1	63.92	control_1
P32418	Sodium/calcium exchanger 1 OS=Homo sapiens GN=SLC8A1 PE=1 SV=3	11.47	control_1
Q9GZX5	Zinc finger protein 350 OS=Homo sapiens GN=ZNF350 PE=1 SV=3	90.6	control_1
Q13285	Steroidogenic factor 1 OS=Homo sapiens GN=NR5A1 PE=1 SV=2	20.67	control_1
Q6PIV2	Forkhead box protein R1 OS=Homo sapiens GN=FOXR1 PE=1 SV=2	207.97	control_1
O76000	Putative olfactory receptor 2B3 OS=Homo sapiens GN=OR2B3 PE=3 SV=1	22.26	control_1
Q5JRX3	Presequence protease, mitochondrial OS=Homo sapiens GN=PITRM1 PE=1 SV=3	23.15	control_1
Q8N6Y1	Protocadherin-20 OS=Homo sapiens GN=PCDH20 PE=2 SV=2	18.44	control_1
P51575	P2X purinoceptor 1 OS=Homo sapiens GN=P2RX1 PE=1 SV=1	30.11	control_1
Q99457	Nucleosome assembly protein 1-like 3 OS=Homo sapiens GN=NAP1L3 PE=2 SV=2	28.28	control_1
Q8ND30	Liprin-beta-2 OS=Homo sapiens GN=PPFIBP2 PE=1 SV=3	8.35	control_1
O95170	CMT1A duplicated region transcript 1 protein OS=Homo sapiens GN=CDRT1 PE=2 SV=3	117.35	control_1
P59045	NACHT, LRR and PYD domains-containing protein 11 OS=Homo sapiens GN=NLRP11 PE=2 SV=2	118.17	control_1
Q5JRV8	Transmembrane protein 255A OS=Homo sapiens GN=TMEM255A PE=2 SV=1	13.11	control_1
Q03468	DNA excision repair protein ERCC-6 OS=Homo sapiens GN=ERCC6 PE=1 SV=1	26.2	control_1
Q96Q40	Cyclin-dependent kinase 15 OS=Homo sapiens GN=CDK15 PE=1 SV=2	17.11	control_1
A6ND36	Protein FAM83G OS=Homo sapiens GN=FAM83G PE=1 SV=2	27.74	control_1
Q8NCN4	E3 ubiquitin-protein ligase RNF169 OS=Homo sapiens GN=RNF169 PE=1 SV=2	65.37	control_1
P53708	Integrin alpha-8 OS=Homo sapiens GN=ITGA8 PE=1 SV=3	34.85	control_1
O75578	Integrin alpha-10 OS=Homo sapiens GN=ITGA10 PE=2 SV=2	26.89	control_1
Q96CW6	Probable RNA polymerase II nuclear localization protein SLC7A6OS OS=Homo sapiens GN=SLC7A6OS PE=1 SV=2	13.29	control_1
O75553	Disabled homolog 1 OS=Homo sapiens GN=DAB1 PE=1 SV=3	43.16	control_1
Q96Q06	Perilipin-4 OS=Homo sapiens GN=PLIN4 PE=1 SV=2	120.57	control_1
P31930	Cytochrome b-c1 complex subunit 1, mitochondrial OS=Homo sapiens GN=UQCRC1 PE=1 SV=3	21.56	control_1
Q96D53	AarF domain-containing protein kinase 4 OS=Homo sapiens GN=ADCK4 PE=1 SV=2	51.79	control_1
Q96CT2	Kelch-like protein 29 OS=Homo sapiens GN=KLHL29 PE=2 SV=3	50.07	control_1
Q96PL5	Erythroid membrane-associated protein OS=Homo sapiens GN=ERMAP PE=1 SV=1	34.1	control_1
P17661	Desmin OS=Homo sapiens GN=DES PE=1 SV=3	70.57	control_1
Q9C0E8	Protein lunapark OS=Homo sapiens GN=LNP PE=1 SV=2	52.86	control_1
Q96PK6	RNA-binding protein 14 OS=Homo sapiens GN=RBM14 PE=1 SV=2	332.19	control_1
Q12788	Transducin beta-like protein 3 OS=Homo sapiens GN=TBL3 PE=1 SV=2	55.34	control_1
Q5T655	Cilia- and flagella-associated protein 58 OS=Homo sapiens GN=CFAP58 PE=1 SV=1	109.85	control_1
A6NCI4	von Willebrand factor A domain-containing protein 3A OS=Homo sapiens GN=VWA3A PE=2 SV=3	43.96	control_1
Q3SY89	RNA polymerase II transcription factor SIII subunit A3-like-1 OS=Homo sapiens GN=TCEB3CL PE=2 SV=1	24.79	control_1
Q9NZT2	Opioid growth factor receptor OS=Homo sapiens GN=OGFR PE=1 SV=3	30.41	control_1
Q9C0B7	Transport and Golgi organization protein 6 homolog OS=Homo sapiens GN=TANGO6 PE=1 SV=2	29.21	control_1
Q12768	WASH complex subunit strumpellin OS=Homo sapiens GN=KIAA0196 PE=1 SV=1	137.74	control_1
Q14940	Sodium/hydrogen exchanger 5 OS=Homo sapiens GN=SLC9A5 PE=1 SV=2	9.64	control_1
Q96D09	G-protein coupled receptor-associated sorting protein 2 OS=Homo sapiens GN=GPRASP2 PE=1 SV=1	13.17	control_1
Q14938	Nuclear factor 1 X-type OS=Homo sapiens GN=NFIX PE=1 SV=2	43.13	control_1
Q9C0A6	SET domain-containing protein 5 OS=Homo sapiens GN=SETD5 PE=1 SV=2	102.22	control_1
Q562F6	Shugoshin-like 2 OS=Homo sapiens GN=SGOL2 PE=1 SV=2	64.1	control_1
Q96CN7	Isochorismatase domain-containing protein 1 OS=Homo sapiens GN=ISOC1 PE=1 SV=3	99.01	control_1
Q96CN5	Leucine-rich repeat-containing protein 45 OS=Homo sapiens GN=LRRC45 PE=1 SV=1	81.62	control_1
Q8NCC3	Group XV phospholipase A2 OS=Homo sapiens GN=PLA2G15 PE=1 SV=2	126.68	control_1
Q7Z7E8	Ubiquitin-conjugating enzyme E2 Q1 OS=Homo sapiens GN=UBE2Q1 PE=1 SV=1	44.1	control_1
Q96PG8	Bcl-2-binding component 3 OS=Homo sapiens GN=BBC3 PE=2 SV=2	182.63	control_1
Q10567	AP-1 complex subunit beta-1 OS=Homo sapiens GN=AP1B1 PE=1 SV=2	43.19	control_1
Q9NZQ8	Transient receptor potential cation channel subfamily M member 5 OS=Homo sapiens GN=TRPM5 PE=2 SV=1	21.86	control_1
Q9NZQ7	Programmed cell death 1 ligand 1 OS=Homo sapiens GN=CD274 PE=1 SV=1	31.46	control_1
Q5MNV8	F-box only protein 47 OS=Homo sapiens GN=FBXO47 PE=2 SV=2	46.42	control_1
P07814	Bifunctional glutamate/proline--tRNA ligase OS=Homo sapiens GN=EPRS PE=1 SV=5	99.07	control_1
Q00765	Receptor expression-enhancing protein 5 OS=Homo sapiens GN=REEP5 PE=1 SV=3	184.88	control_1
Q96PB1	CAS1 domain-containing protein 1 OS=Homo sapiens GN=CASD1 PE=2 SV=1	4.02	control_1
O60885	Bromodomain-containing protein 4 OS=Homo sapiens GN=BRD4 PE=1 SV=2	24.97	control_1
Q1L5Z9	LON peptidase N-terminal domain and RING finger protein 2 OS=Homo sapiens GN=LONRF2 PE=2 SV=3	36.4	control_1
Q6ZRP5	Putative uncharacterized protein FLJ46204 OS=Homo sapiens PE=5 SV=2	159.33	control_1
Q5BJF6	Outer dense fiber protein 2 OS=Homo sapiens GN=ODF2 PE=1 SV=1	40.49	control_1
Q9UMY4	Sorting nexin-12 OS=Homo sapiens GN=SNX12 PE=1 SV=3	21.02	control_1
Q9UN75	Protocadherin alpha-12 OS=Homo sapiens GN=PCDHA12 PE=2 SV=1	1.04	control_1
P12755	Ski oncogene OS=Homo sapiens GN=SKI PE=1 SV=1	131.42	control_1
O15438	Canalicular multispecific organic anion transporter 2 OS=Homo sapiens GN=ABCC3 PE=1 SV=3	20.59	control_1
A0AUZ9	KAT8 regulatory NSL complex subunit 1-like protein OS=Homo sapiens GN=KANSL1L PE=1 SV=2	28.51	control_1
O60828	Polyglutamine-binding protein 1 OS=Homo sapiens GN=PQBP1 PE=1 SV=1	269.3	control_1
Q9UN67	Protocadherin beta-10 OS=Homo sapiens GN=PCDHB10 PE=1 SV=1	15.31	control_1
Q9UN66	Protocadherin beta-8 OS=Homo sapiens GN=PCDHB8 PE=2 SV=3	95.34	control_1
Q6S8J7	POTE ankyrin domain family member A OS=Homo sapiens GN=POTEA PE=2 SV=1	1.75	control_1
Q7Z736	Pleckstrin homology domain-containing family H member 3 OS=Homo sapiens GN=PLEKHH3 PE=1 SV=2	125.55	control_1
P08235	Mineralocorticoid receptor OS=Homo sapiens GN=NR3C2 PE=1 SV=1	61.11	control_1
Q96P47	Arf-GAP with GTPase, ANK repeat and PH domain-containing protein 3 OS=Homo sapiens GN=AGAP3 PE=1 SV=2	8.16	control_1
Q96P44	Collagen alpha-1(XXI) chain OS=Homo sapiens GN=COL21A1 PE=2 SV=1	10.3	control_1
P53618	Coatomer subunit beta OS=Homo sapiens GN=COPB1 PE=1 SV=3	16.38	control_1
Q13136	Liprin-alpha-1 OS=Homo sapiens GN=PPFIA1 PE=1 SV=1	58.83	control_1
Q13131	5'-AMP-activated protein kinase catalytic subunit alpha-1 OS=Homo sapiens GN=PRKAA1 PE=1 SV=4	9.37	control_1
P19793	Retinoic acid receptor RXR-alpha OS=Homo sapiens GN=RXRA PE=1 SV=1	41.31	control_1
Q96P26	Cytosolic 5'-nucleotidase 1B OS=Homo sapiens GN=NT5C1B PE=2 SV=2	6.26	control_1
Q8NBL1	Protein O-glucosyltransferase 1 OS=Homo sapiens GN=POGLUT1 PE=1 SV=1	6.47	control_1
Q96BW1	Uracil phosphoribosyltransferase homolog OS=Homo sapiens GN=UPRT PE=1 SV=1	80.51	control_1
Q96P16	Regulation of nuclear pre-mRNA domain-containing protein 1A OS=Homo sapiens GN=RPRD1A PE=1 SV=1	27.49	control_1
Q13105	Zinc finger and BTB domain-containing protein 17 OS=Homo sapiens GN=ZBTB17 PE=1 SV=3	39.55	control_1
Q5JR12	Protein phosphatase 1J OS=Homo sapiens GN=PPM1J PE=1 SV=1	124.3	control_1
O14981	TATA-binding protein-associated factor 172 OS=Homo sapiens GN=BTAF1 PE=1 SV=2	41.51	control_1
O14980	Exportin-1 OS=Homo sapiens GN=XPO1 PE=1 SV=1	59.32	control_1
A8MPP1	Putative ATP-dependent RNA helicase DDX11-like protein 8 OS=Homo sapiens GN=DDX11L8 PE=1 SV=1	102.3	control_1
O14978	Zinc finger protein 263 OS=Homo sapiens GN=ZNF263 PE=1 SV=2	23.53	control_1
Q14896	Myosin-binding protein C, cardiac-type OS=Homo sapiens GN=MYBPC3 PE=1 SV=4	4.42	control_1
Q147X3	N-alpha-acetyltransferase 30 OS=Homo sapiens GN=NAA30 PE=1 SV=1	41.26	control_1
Q9NYX4	Neuron-specific vesicular protein calcyon OS=Homo sapiens GN=CALY PE=1 SV=1	135.62	control_1
Q96BR6	Zinc finger protein 669 OS=Homo sapiens GN=ZNF669 PE=2 SV=2	3.17	control_1
P50993	Sodium/potassium-transporting ATPase subunit alpha-2 OS=Homo sapiens GN=ATP1A2 PE=1 SV=1	54.65	control_1
O14939	Phospholipase D2 OS=Homo sapiens GN=PLD2 PE=1 SV=2	12.81	control_1
O43896	Kinesin-like protein KIF1C OS=Homo sapiens GN=KIF1C PE=1 SV=3	50.9	control_1
Q96C10	Probable ATP-dependent RNA helicase DHX58 OS=Homo sapiens GN=DHX58 PE=1 SV=1	37.88	control_1
Q7Z6G8	Ankyrin repeat and sterile alpha motif domain-containing protein 1B OS=Homo sapiens GN=ANKS1B PE=1 SV=2	32.97	control_1
O14917	Protocadherin-17 OS=Homo sapiens GN=PCDH17 PE=2 SV=2	173.09	control_1
O43866	CD5 antigen-like OS=Homo sapiens GN=CD5L PE=1 SV=1	134.86	control_1
Q4G0N8	Sodium/hydrogen exchanger 10 OS=Homo sapiens GN=SLC9C1 PE=2 SV=2	37.97	control_1
P48637	Glutathione synthetase OS=Homo sapiens GN=GSS PE=1 SV=1	4.99	control_1
Q6ZQW0	Indoleamine 2,3-dioxygenase 2 OS=Homo sapiens GN=IDO2 PE=1 SV=4	111.32	control_1
Q5JQC9	A-kinase anchor protein 4 OS=Homo sapiens GN=AKAP4 PE=1 SV=1	50.43	control_1
Q4G0J3	La-related protein 7 OS=Homo sapiens GN=LARP7 PE=1 SV=1	232.47	control_1
Q8N5D0	WD and tetratricopeptide repeats protein 1 OS=Homo sapiens GN=WDTC1 PE=1 SV=2	27.9	control_1
O00712	Nuclear factor 1 B-type OS=Homo sapiens GN=NFIB PE=1 SV=2	3.51	control_1
P14866	Heterogeneous nuclear ribonucleoprotein L OS=Homo sapiens GN=HNRNPL PE=1 SV=2	91.37	control_1
Q9NYF5	Protein FAM13B OS=Homo sapiens GN=FAM13B PE=2 SV=2	17.36	control_1
Q15283	Ras GTPase-activating protein 2 OS=Homo sapiens GN=RASA2 PE=1 SV=3	32.97	control_1
Q3KP31	Zinc finger protein 791 OS=Homo sapiens GN=ZNF791 PE=2 SV=1	11.26	control_1
O60749	Sorting nexin-2 OS=Homo sapiens GN=SNX2 PE=1 SV=2	33.02	control_1
Q6VN20	Ran-binding protein 10 OS=Homo sapiens GN=RANBP10 PE=1 SV=1	81.77	control_1
Q9H9Y2	Ribosome production factor 1 OS=Homo sapiens GN=RPF1 PE=1 SV=2	10.82	control_1
O15344	E3 ubiquitin-protein ligase Midline-1 OS=Homo sapiens GN=MID1 PE=1 SV=1	30.88	control_1
O60732	Melanoma-associated antigen C1 OS=Homo sapiens GN=MAGEC1 PE=1 SV=3	28.04	control_1
Q8NAT1	Protein O-linked-mannose beta-1,4-N-acetylglucosaminyltransferase 2 OS=Homo sapiens GN=POMGNT2 PE=1 SV=1	30.51	control_1
Q9NYD6	Homeobox protein Hox-C10 OS=Homo sapiens GN=HOXC10 PE=1 SV=2	14.03	control_1
Q13087	Protein disulfide-isomerase A2 OS=Homo sapiens GN=PDIA2 PE=1 SV=2	156.68	control_1
Q9BZJ0	Crooked neck-like protein 1 OS=Homo sapiens GN=CRNKL1 PE=1 SV=4	60.75	control_1
Q9ULT0	Tetratricopeptide repeat protein 7A OS=Homo sapiens GN=TTC7A PE=1 SV=3	171.89	control_1
P33992	DNA replication licensing factor MCM5 OS=Homo sapiens GN=MCM5 PE=1 SV=5	69.79	control_1
Q9BZH6	WD repeat-containing protein 11 OS=Homo sapiens GN=WDR11 PE=1 SV=1	59.37	control_1
Q8N587	Zinc finger protein 561 OS=Homo sapiens GN=ZNF561 PE=2 SV=2	58.22	control_1
Q14CX7	N-alpha-acetyltransferase 25, NatB auxiliary subunit OS=Homo sapiens GN=NAA25 PE=1 SV=1	158.41	control_1
A6NNM3	RIMS-binding protein 3B OS=Homo sapiens GN=RIMBP3B PE=3 SV=3	38.9	control_1
P08133	Annexin A6 OS=Homo sapiens GN=ANXA6 PE=1 SV=3	41.12	control_1
Q13045	Protein flightless-1 homolog OS=Homo sapiens GN=FLII PE=1 SV=2	16.2	control_1
Q9BZE9	Tether containing UBX domain for GLUT4 OS=Homo sapiens GN=ASPSCR1 PE=1 SV=1	49.6	control_1
Q9ULP0	Protein NDRG4 OS=Homo sapiens GN=NDRG4 PE=1 SV=2	167.92	control_1
Q9BZE0	Zinc finger protein GLIS2 OS=Homo sapiens GN=GLIS2 PE=1 SV=2	164.34	control_1
P02818	Osteocalcin OS=Homo sapiens GN=BGLAP PE=1 SV=2	380.79	control_1
P29474	Nitric oxide synthase, endothelial OS=Homo sapiens GN=NOS3 PE=1 SV=3	52.26	control_1
Q6ECI4	Zinc finger protein 470 OS=Homo sapiens GN=ZNF470 PE=2 SV=3	15.84	control_1
Q7L592	NADH dehydrogenase [ubiquinone] complex I, assembly factor 7 OS=Homo sapiens GN=NDUFAF7 PE=1 SV=1	29.57	control_1
Q7Z601	Probable G-protein coupled receptor 142 OS=Homo sapiens GN=GPR142 PE=2 SV=1	163.23	control_1
O75366	Advillin OS=Homo sapiens GN=AVIL PE=1 SV=3	92.06	control_1
O75363	Breast carcinoma-amplified sequence 1 OS=Homo sapiens GN=BCAS1 PE=1 SV=2	12.63	control_1
Q13009	T-lymphoma invasion and metastasis-inducing protein 1 OS=Homo sapiens GN=TIAM1 PE=1 SV=2	13.77	control_1
Q9ULM2	Zinc finger protein 490 OS=Homo sapiens GN=ZNF490 PE=1 SV=2	137.43	control_1
Q9NXZ1	Sarcoma antigen 1 OS=Homo sapiens GN=SAGE1 PE=1 SV=2	23.66	control_1
P17481	Homeobox protein Hox-B8 OS=Homo sapiens GN=HOXB8 PE=2 SV=2	64.72	control_1
Q8N4P6	Leucine-rich repeat-containing protein 71 OS=Homo sapiens GN=LRRC71 PE=2 SV=1	77.18	control_1
O75334	Liprin-alpha-2 OS=Homo sapiens GN=PPFIA2 PE=1 SV=2	24.8	control_1
Q9ULK4	Mediator of RNA polymerase II transcription subunit 23 OS=Homo sapiens GN=MED23 PE=1 SV=2	32.33	control_1
Q9ULK0	Glutamate receptor ionotropic, delta-1 OS=Homo sapiens GN=GRID1 PE=2 SV=2	20.35	control_1
O14863	Zinc transporter 4 OS=Homo sapiens GN=SLC30A4 PE=2 SV=2	2.74	control_1
P09871	Complement C1s subcomponent OS=Homo sapiens GN=C1S PE=1 SV=1	2.34	control_1
Q9ULJ3	Zinc finger and BTB domain-containing protein 21 OS=Homo sapiens GN=ZBTB21 PE=1 SV=2	20.09	control_1
Q8N4N3	Kelch-like protein 36 OS=Homo sapiens GN=KLHL36 PE=1 SV=1	46.93	control_1
Q8NAG6	Ankyrin repeat and LEM domain-containing protein 1 OS=Homo sapiens GN=ANKLE1 PE=2 SV=2	89.91	control_1
Q9ULI4	Kinesin-like protein KIF26A OS=Homo sapiens GN=KIF26A PE=2 SV=3	27.45	control_1
Q96NK8	Neurogenic differentiation factor 6 OS=Homo sapiens GN=NEUROD6 PE=2 SV=1	39.65	control_1
Q9ULH1	Arf-GAP with SH3 domain, ANK repeat and PH domain-containing protein 1 OS=Homo sapiens GN=ASAP1 PE=1 SV=4	50.53	control_1
O14827	Ras-specific guanine nucleotide-releasing factor 2 OS=Homo sapiens GN=RASGRF2 PE=1 SV=2	41.46	control_1
O43781	Dual specificity tyrosine-phosphorylation-regulated kinase 3 OS=Homo sapiens GN=DYRK3 PE=2 SV=3	156.29	control_1
O14815	Calpain-9 OS=Homo sapiens GN=CAPN9 PE=1 SV=1	36.4	control_1
P58335	Anthrax toxin receptor 2 OS=Homo sapiens GN=ANTXR2 PE=1 SV=5	42.54	control_1
Q5JPH6	Probable glutamate--tRNA ligase, mitochondrial OS=Homo sapiens GN=EARS2 PE=1 SV=2	24.53	control_1
Q02779	Mitogen-activated protein kinase kinase kinase 10 OS=Homo sapiens GN=MAP3K10 PE=1 SV=3	103.93	control_1
Q96NG8	Zinc finger protein 582 OS=Homo sapiens GN=ZNF582 PE=2 SV=1	24.38	control_1
Q5W0A0	Glutamate-rich protein 6B OS=Homo sapiens GN=ERICH6B PE=2 SV=1	132.51	control_1
Q9ULD5	Zinc finger protein 777 OS=Homo sapiens GN=ZNF777 PE=1 SV=2	21.5	control_1
Q9BYX2	TBC1 domain family member 2A OS=Homo sapiens GN=TBC1D2 PE=1 SV=3	25.99	control_1
Q00587	Cdc42 effector protein 1 OS=Homo sapiens GN=CDC42EP1 PE=1 SV=1	57.83	control_1
Q9ULC8	Probable palmitoyltransferase ZDHHC8 OS=Homo sapiens GN=ZDHHC8 PE=1 SV=3	48.97	control_1
Q92186	Alpha-2,8-sialyltransferase 8B OS=Homo sapiens GN=ST8SIA2 PE=2 SV=1	127.48	control_1
O43734	Adapter protein CIKS OS=Homo sapiens GN=TRAF3IP2 PE=1 SV=3	5.76	control_1
Q8N4F7	RING finger protein 175 OS=Homo sapiens GN=RNF175 PE=1 SV=2	186.44	control_1
Q9ULA0	Aspartyl aminopeptidase OS=Homo sapiens GN=DNPEP PE=1 SV=1	128.08	control_1
Q9Y6I4	Ubiquitin carboxyl-terminal hydrolase 3 OS=Homo sapiens GN=USP3 PE=1 SV=2	131.69	control_1
P36537	UDP-glucuronosyltransferase 2B10 OS=Homo sapiens GN=UGT2B10 PE=1 SV=1	57.51	control_1
P01023	Alpha-2-macroglobulin OS=Homo sapiens GN=A2M PE=1 SV=3	27.19	control_1
Q5SRH9	Tetratricopeptide repeat protein 39A OS=Homo sapiens GN=TTC39A PE=2 SV=1	35.97	control_1
O15297	Protein phosphatase 1D OS=Homo sapiens GN=PPM1D PE=1 SV=1	83.68	control_1
Q96AC6	Kinesin-like protein KIFC2 OS=Homo sapiens GN=KIFC2 PE=2 SV=1	134.29	control_1
O60663	LIM homeobox transcription factor 1-beta OS=Homo sapiens GN=LMX1B PE=1 SV=3	17.02	control_1
Q3KNS6	Zinc finger protein 829 OS=Homo sapiens GN=ZNF829 PE=2 SV=1	8.11	control_1
P24530	Endothelin B receptor OS=Homo sapiens GN=EDNRB PE=1 SV=1	5.3	control_1
Q9Y6B7	AP-4 complex subunit beta-1 OS=Homo sapiens GN=AP4B1 PE=1 SV=2	69.8	control_1
Q5SRD0	Putative WASH complex subunit FAM21 OS=Homo sapiens GN=FAM21D PE=3 SV=2	4.64	control_1
O60645	Exocyst complex component 3 OS=Homo sapiens GN=EXOC3 PE=1 SV=2	300.29	control_1
Q8NA61	Spermatid-associated protein OS=Homo sapiens GN=SPERT PE=1 SV=1	23.4	control_1
Q7Z589	Protein EMSY OS=Homo sapiens GN=EMSY PE=1 SV=2	8.52	control_1
Q05397	Focal adhesion kinase 1 OS=Homo sapiens GN=PTK2 PE=1 SV=2	35.12	control_1
Q96N95	Zinc finger protein 396 OS=Homo sapiens GN=ZNF396 PE=1 SV=2	5.26	control_1
Q96MX3	Zinc finger protein 48 OS=Homo sapiens GN=ZNF48 PE=1 SV=2	0	control_1
Q9UKU9	Angiopoietin-related protein 2 OS=Homo sapiens GN=ANGPTL2 PE=2 SV=1	31.08	control_1
O15231	Zinc finger protein 185 OS=Homo sapiens GN=ZNF185 PE=1 SV=3	166.69	control_1
Q9UKU0	Long-chain-fatty-acid--CoA ligase 6 OS=Homo sapiens GN=ACSL6 PE=2 SV=4	21.24	control_1
O60610	Protein diaphanous homolog 1 OS=Homo sapiens GN=DIAPH1 PE=1 SV=2	44.44	control_1
Q8NA31	Telomere repeats-binding bouquet formation protein 1 OS=Homo sapiens GN=CCDC79 PE=2 SV=3	141.05	control_1
Q9UL41	Paraneoplastic antigen Ma3 OS=Homo sapiens GN=PNMA3 PE=2 SV=2	15.84	control_1
Q96N66	Lysophospholipid acyltransferase 7 OS=Homo sapiens GN=MBOAT7 PE=1 SV=2	13.33	control_1
Q6IFH4	Olfactory receptor 6B2 OS=Homo sapiens GN=OR6B2 PE=2 SV=2	192.36	control_1
Q8N474	Secreted frizzled-related protein 1 OS=Homo sapiens GN=SFRP1 PE=1 SV=1	75.05	control_1
Q9Y5Z7	Host cell factor 2 OS=Homo sapiens GN=HCFC2 PE=1 SV=1	110.76	control_1
Q9H943	Uncharacterized protein C10orf68 OS=Homo sapiens GN=C10orf68 PE=2 SV=2	51.48	control_1
Q15111	Inactive phospholipase C-like protein 1 OS=Homo sapiens GN=PLCL1 PE=1 SV=3	127	control_1
Q9UKP5	A disintegrin and metalloproteinase with thrombospondin motifs 6 OS=Homo sapiens GN=ADAMTS6 PE=2 SV=2	46.04	control_1
P80192	Mitogen-activated protein kinase kinase kinase 9 OS=Homo sapiens GN=MAP3K9 PE=1 SV=3	17.18	control_1
P29376	Leukocyte tyrosine kinase receptor OS=Homo sapiens GN=LTK PE=1 SV=3	7.16	control_1
Q5XPI4	E3 ubiquitin-protein ligase RNF123 OS=Homo sapiens GN=RNF123 PE=1 SV=1	17.16	control_1
Q9UKM7	Endoplasmic reticulum mannosyl-oligosaccharide 1,2-alpha-mannosidase OS=Homo sapiens GN=MAN1B1 PE=1 SV=2	6.58	control_1
Q6Q4G3	Aminopeptidase Q OS=Homo sapiens GN=LVRN PE=1 SV=4	18.73	control_1
O14782	Kinesin-like protein KIF3C OS=Homo sapiens GN=KIF3C PE=1 SV=3	22.19	control_1
Q8N427	Thioredoxin domain-containing protein 3 OS=Homo sapiens GN=NME8 PE=2 SV=2	31.08	control_1
Q9Y666	Solute carrier family 12 member 7 OS=Homo sapiens GN=SLC12A7 PE=1 SV=3	52.21	control_1
Q6YHU6	Thyroid adenoma-associated protein OS=Homo sapiens GN=THADA PE=1 SV=1	55.1	control_1
Q96MN2	NACHT, LRR and PYD domains-containing protein 4 OS=Homo sapiens GN=NLRP4 PE=1 SV=3	112.05	control_1
Q16850	Lanosterol 14-alpha demethylase OS=Homo sapiens GN=CYP51A1 PE=1 SV=3	133.59	control_1
Q14676	Mediator of DNA damage checkpoint protein 1 OS=Homo sapiens GN=MDC1 PE=1 SV=3	12.37	control_1
Q9Y639	Neuroplastin OS=Homo sapiens GN=NPTN PE=1 SV=2	122.21	control_1
Q9Y5R4	HemK methyltransferase family member 1 OS=Homo sapiens GN=HEMK1 PE=1 SV=1	32.76	control_1
Q96MK2	Protein FAM65C OS=Homo sapiens GN=FAM65C PE=2 SV=4	39.65	control_1
Q14BN4	Sarcolemmal membrane-associated protein OS=Homo sapiens GN=SLMAP PE=1 SV=1	43.34	control_1
Q9NWU5	39S ribosomal protein L22, mitochondrial OS=Homo sapiens GN=MRPL22 PE=1 SV=1	54.51	control_1
A6NMB9	Putative fidgetin-like protein 2 OS=Homo sapiens GN=FIGNL2 PE=5 SV=2	61.03	control_1
A7MD48	Serine/arginine repetitive matrix protein 4 OS=Homo sapiens GN=SRRM4 PE=1 SV=2	104.84	control_1
Q16825	Tyrosine-protein phosphatase non-receptor type 21 OS=Homo sapiens GN=PTPN21 PE=1 SV=2	77	control_1
Q14644	Ras GTPase-activating protein 3 OS=Homo sapiens GN=RASA3 PE=1 SV=3	13.7	control_1
Q5T2R2	Decaprenyl-diphosphate synthase subunit 1 OS=Homo sapiens GN=PDSS1 PE=1 SV=1	91.24	control_1
Q9BXY5	Calcyphosin-2 OS=Homo sapiens GN=CAPS2 PE=2 SV=2	84.13	control_1
Q9NX38	Protein Simiate OS=Homo sapiens GN=FAM206A PE=1 SV=1	83.85	control_1
P48454	Serine/threonine-protein phosphatase 2B catalytic subunit gamma isoform OS=Homo sapiens GN=PPP3CC PE=1 SV=3	214.38	control_1
P50750	Cyclin-dependent kinase 9 OS=Homo sapiens GN=CDK9 PE=1 SV=3	59.31	control_1
Q96MG7	Melanoma-associated antigen G1 OS=Homo sapiens GN=NDNL2 PE=1 SV=1	179	control_1
O00562	Membrane-associated phosphatidylinositol transfer protein 1 OS=Homo sapiens GN=PITPNM1 PE=1 SV=4	15.71	control_1
P17302	Gap junction alpha-1 protein OS=Homo sapiens GN=GJA1 PE=1 SV=2	179.28	control_1
P58215	Lysyl oxidase homolog 3 OS=Homo sapiens GN=LOXL3 PE=2 SV=1	103.41	control_1
Q6ZP82	Coiled-coil domain-containing protein 141 OS=Homo sapiens GN=CCDC141 PE=1 SV=2	11.01	control_1
Q9BY77	Polymerase delta-interacting protein 3 OS=Homo sapiens GN=POLDIP3 PE=1 SV=2	81.33	control_1
Q9Y5J1	U3 small nucleolar RNA-associated protein 18 homolog OS=Homo sapiens GN=UTP18 PE=1 SV=3	187.62	control_1
Q9UKA2	F-box/LRR-repeat protein 4 OS=Homo sapiens GN=FBXL4 PE=1 SV=2	29.64	control_1
Q6P9H4	Connector enhancer of kinase suppressor of ras 3 OS=Homo sapiens GN=CNKSR3 PE=1 SV=1	207.83	control_1
Q9Y5I2	Protocadherin alpha-10 OS=Homo sapiens GN=PCDHA10 PE=2 SV=1	2.49	control_1
Q9BXT6	Putative helicase Mov10l1 OS=Homo sapiens GN=MOV10L1 PE=2 SV=1	166.75	control_1
Q00444	Homeobox protein Hox-C5 OS=Homo sapiens GN=HOXC5 PE=3 SV=1	38.31	control_1
Q9Y5H9	Protocadherin alpha-2 OS=Homo sapiens GN=PCDHA2 PE=1 SV=1	150.77	control_1
Q9Y5H3	Protocadherin gamma-A10 OS=Homo sapiens GN=PCDHGA10 PE=2 SV=1	34.54	control_1
O00515	Ladinin-1 OS=Homo sapiens GN=LAD1 PE=1 SV=2	45.25	control_1
O00512	B-cell CLL/lymphoma 9 protein OS=Homo sapiens GN=BCL9 PE=1 SV=4	80.05	control_1
Q9NWK9	Box C/D snoRNA protein 1 OS=Homo sapiens GN=ZNHIT6 PE=1 SV=1	83.21	control_1
Q9Y5F2	Protocadherin beta-11 OS=Homo sapiens GN=PCDHB11 PE=2 SV=1	79.57	control_1
P28827	Receptor-type tyrosine-protein phosphatase mu OS=Homo sapiens GN=PTPRM PE=1 SV=2	27.82	control_1
Q9Y5F1	Protocadherin beta-12 OS=Homo sapiens GN=PCDHB12 PE=2 SV=1	224.77	control_1
Q8TF47	Zinc finger protein 90 homolog OS=Homo sapiens GN=ZFP90 PE=1 SV=2	71.46	control_1
O15195	Villin-like protein OS=Homo sapiens GN=VILL PE=2 SV=3	122.89	control_1
Q9Y5E5	Protocadherin beta-4 OS=Homo sapiens GN=PCDHB4 PE=2 SV=1	20.44	control_1
P26639	Threonine--tRNA ligase, cytoplasmic OS=Homo sapiens GN=TARS PE=1 SV=3	37.65	control_1
Q9BXP2	Solute carrier family 12 member 9 OS=Homo sapiens GN=SLC12A9 PE=1 SV=1	13.14	control_1
Q9BY12	S phase cyclin A-associated protein in the endoplasmic reticulum OS=Homo sapiens GN=SCAPER PE=1 SV=2	42.28	control_1
Q8TER0	Sushi, nidogen and EGF-like domain-containing protein 1 OS=Homo sapiens GN=SNED1 PE=2 SV=2	32.94	control_1
Q6P9B6	TLD domain-containing protein 1 OS=Homo sapiens GN=TLDC1 PE=1 SV=2	2.53	control_1
Q7Z3Z4	Piwi-like protein 4 OS=Homo sapiens GN=PIWIL4 PE=2 SV=2	107.83	control_1
O60568	Procollagen-lysine,2-oxoglutarate 5-dioxygenase 3 OS=Homo sapiens GN=PLOD3 PE=1 SV=1	113.35	control_1
P14651	Homeobox protein Hox-B3 OS=Homo sapiens GN=HOXB3 PE=2 SV=2	7.56	control_1
O60551	Glycylpeptide N-tetradecanoyltransferase 2 OS=Homo sapiens GN=NMT2 PE=1 SV=1	11.58	control_1
Q96LZ7	Regulator of microtubule dynamics protein 2 OS=Homo sapiens GN=RMDN2 PE=1 SV=2	19.08	control_1
Q15084	Protein disulfide-isomerase A6 OS=Homo sapiens GN=PDIA6 PE=1 SV=1	318.73	control_1
Q9Y5A6	Zinc finger and SCAN domain-containing protein 21 OS=Homo sapiens GN=ZSCAN21 PE=1 SV=2	5.04	control_1
Q9BXL6	Caspase recruitment domain-containing protein 14 OS=Homo sapiens GN=CARD14 PE=1 SV=2	84.08	control_1
P20062	Transcobalamin-2 OS=Homo sapiens GN=TCN2 PE=1 SV=3	5.25	control_1
B2RXH4	BTB/POZ domain-containing protein 18 OS=Homo sapiens GN=BTBD18 PE=2 SV=1	94	control_1
P59901	Leukocyte immunoglobulin-like receptor subfamily A member 4 OS=Homo sapiens GN=LILRA4 PE=1 SV=2	6.92	control_1
Q9UK73	Protein fem-1 homolog B OS=Homo sapiens GN=FEM1B PE=1 SV=1	87.73	control_1
P63145	Endogenous retrovirus group K member 24 Gag polyprotein OS=Homo sapiens GN=ERVK-24 PE=1 SV=2	7.68	control_1
Q7Z478	ATP-dependent RNA helicase DHX29 OS=Homo sapiens GN=DHX29 PE=1 SV=2	76.3	control_1
Q96M96	FYVE, RhoGEF and PH domain-containing protein 4 OS=Homo sapiens GN=FGD4 PE=1 SV=2	164.89	control_1
Q15063	Periostin OS=Homo sapiens GN=POSTN PE=1 SV=2	39	control_1
Q8TEM1	Nuclear pore membrane glycoprotein 210 OS=Homo sapiens GN=NUP210 PE=1 SV=3	39.25	control_1
Q96LW9	Zinc finger and SCAN domain-containing protein 31 OS=Homo sapiens GN=ZSCAN31 PE=1 SV=2	11.71	control_1
P63130	Endogenous retrovirus group K member 7 Gag polyprotein OS=Homo sapiens GN=ERVK-7 PE=3 SV=2	7.68	control_1
Q15054	DNA polymerase delta subunit 3 OS=Homo sapiens GN=POLD3 PE=1 SV=2	22.83	control_1
Q15050	Ribosome biogenesis regulatory protein homolog OS=Homo sapiens GN=RRS1 PE=1 SV=2	14.1	control_1
P14618	Pyruvate kinase PKM OS=Homo sapiens GN=PKM PE=1 SV=4	138.24	control_1
P63128	Endogenous retrovirus group K member 9 Pol protein OS=Homo sapiens GN=ERVK-9 PE=3 SV=3	7.68	control_1
P63126	Endogenous retrovirus group K member 9 Gag polyprotein OS=Homo sapiens GN=ERVK-9 PE=1 SV=2	7.68	control_1
P10253	Lysosomal alpha-glucosidase OS=Homo sapiens GN=GAA PE=1 SV=4	40.95	control_1
P51160	Cone cGMP-specific 3',5'-cyclic phosphodiesterase subunit alpha' OS=Homo sapiens GN=PDE6C PE=1 SV=2	38.98	control_1
P35968	Vascular endothelial growth factor receptor 2 OS=Homo sapiens GN=KDR PE=1 SV=2	35.82	control_1
P20020	Plasma membrane calcium-transporting ATPase 1 OS=Homo sapiens GN=ATP2B1 PE=1 SV=3	13.64	control_1
Q8IZU8	Dermatan-sulfate epimerase-like protein OS=Homo sapiens GN=DSEL PE=2 SV=2	61.76	control_1
Q9UK32	Ribosomal protein S6 kinase alpha-6 OS=Homo sapiens GN=RPS6KA6 PE=1 SV=1	20.3	control_1
Q15020	Squamous cell carcinoma antigen recognized by T-cells 3 OS=Homo sapiens GN=SART3 PE=1 SV=1	22.25	control_1
Q9H845	Acyl-CoA dehydrogenase family member 9, mitochondrial OS=Homo sapiens GN=ACAD9 PE=1 SV=1	20.76	control_1
Q96M34	Uncharacterized protein C3orf30 OS=Homo sapiens GN=C3orf30 PE=2 SV=2	26.71	control_1
Q9Y4W6	AFG3-like protein 2 OS=Homo sapiens GN=AFG3L2 PE=1 SV=2	43.89	control_1
Q9UJN7	Zinc finger protein 391 OS=Homo sapiens GN=ZNF391 PE=2 SV=2	64.33	control_1
P35916	Vascular endothelial growth factor receptor 3 OS=Homo sapiens GN=FLT4 PE=1 SV=3	23.23	control_1
Q4VC44	FLYWCH-type zinc finger-containing protein 1 OS=Homo sapiens GN=FLYWCH1 PE=1 SV=2	23.58	control_1
Q05209	Tyrosine-protein phosphatase non-receptor type 12 OS=Homo sapiens GN=PTPN12 PE=1 SV=3	59.21	control_1
O75155	Cullin-associated NEDD8-dissociated protein 2 OS=Homo sapiens GN=CAND2 PE=1 SV=3	130.89	control_1
O75153	Clustered mitochondria protein homolog OS=Homo sapiens GN=CLUH PE=1 SV=2	85.54	control_1
O75152	Zinc finger CCCH domain-containing protein 11A OS=Homo sapiens GN=ZC3H11A PE=1 SV=3	54.17	control_1
Q1MSJ5	Centrosome and spindle pole-associated protein 1 OS=Homo sapiens GN=CSPP1 PE=1 SV=4	25.34	control_1
Q9P2M1	LRP2-binding protein OS=Homo sapiens GN=LRP2BP PE=1 SV=2	24.32	control_1
O14682	Ectoderm-neural cortex protein 1 OS=Homo sapiens GN=ENC1 PE=1 SV=2	63.76	control_1
P62685	Endogenous retrovirus group K member 8 Gag polyprotein OS=Homo sapiens GN=ERVK-8 PE=1 SV=2	7.68	control_1
P62684	Endogenous retrovirus group K member 113 Gag polyprotein OS=Homo sapiens GN=HERVK_113 PE=1 SV=2	7.68	control_1
P62683	Endogenous retrovirus group K member 21 Gag polyprotein OS=Homo sapiens GN=ERVK-21 PE=1 SV=2	1.02	control_1
Q8N323	NXPE family member 1 OS=Homo sapiens GN=NXPE1 PE=2 SV=2	49.45	control_1
O75145	Liprin-alpha-3 OS=Homo sapiens GN=PPFIA3 PE=1 SV=3	52.36	control_1
Q9UJL9	Zinc finger protein ZFP69B OS=Homo sapiens GN=ZFP69B PE=1 SV=2	53.16	control_1
O14678	ATP-binding cassette sub-family D member 4 OS=Homo sapiens GN=ABCD4 PE=1 SV=1	10.94	control_1
A6NLF2	RNA polymerase II transcription factor SIII subunit A3-like-2 OS=Homo sapiens GN=TCEB3CL2 PE=3 SV=1	24.79	control_1
Q9P2K1	Coiled-coil and C2 domain-containing protein 2A OS=Homo sapiens GN=CC2D2A PE=1 SV=3	28.71	control_1
Q9NW97	Transmembrane protein 51 OS=Homo sapiens GN=TMEM51 PE=1 SV=1	7.34	control_1
Q7Z3K3	Pogo transposable element with ZNF domain OS=Homo sapiens GN=POGZ PE=1 SV=2	37.7	control_1
Q14585	Zinc finger protein 345 OS=Homo sapiens GN=ZNF345 PE=2 SV=1	88.33	control_1
P23921	Ribonucleoside-diphosphate reductase large subunit OS=Homo sapiens GN=RRM1 PE=1 SV=1	84.65	control_1
Q8IZL8	Proline-, glutamic acid- and leucine-rich protein 1 OS=Homo sapiens GN=PELP1 PE=1 SV=2	70.28	control_1
P15085	Carboxypeptidase A1 OS=Homo sapiens GN=CPA1 PE=1 SV=2	36.29	control_1
Q9Y4R7	Tubulin monoglycylase TTLL3 OS=Homo sapiens GN=TTLL3 PE=1 SV=2	43.58	control_1
Q96LK8	Spermatogenesis-associated protein 32 OS=Homo sapiens GN=SPATA32 PE=1 SV=3	24.46	control_1
Q14562	ATP-dependent RNA helicase DHX8 OS=Homo sapiens GN=DHX8 PE=1 SV=1	26.13	control_1
P48380	Transcription factor RFX3 OS=Homo sapiens GN=RFX3 PE=1 SV=2	40.95	control_1
P48378	DNA-binding protein RFX2 OS=Homo sapiens GN=RFX2 PE=2 SV=2	94.39	control_1
Q16720	Plasma membrane calcium-transporting ATPase 3 OS=Homo sapiens GN=ATP2B3 PE=1 SV=3	3.75	control_1
Q9YNA8	Endogenous retrovirus group K member 19 Gag polyprotein OS=Homo sapiens GN=ERVK-19 PE=1 SV=3	7.68	control_1
Q8IZH2	5'-3' exoribonuclease 1 OS=Homo sapiens GN=XRN1 PE=1 SV=1	13.36	control_1
Q2PZI1	Probable C-mannosyltransferase DPY19L1 OS=Homo sapiens GN=DPY19L1 PE=2 SV=1	79.74	control_1
Q5FWF5	N-acetyltransferase ESCO1 OS=Homo sapiens GN=ESCO1 PE=1 SV=3	20.2	control_1
O14607	Histone demethylase UTY OS=Homo sapiens GN=UTY PE=1 SV=2	64.55	control_1
O00471	Exocyst complex component 5 OS=Homo sapiens GN=EXOC5 PE=1 SV=1	72.38	control_1
P52824	Diacylglycerol kinase theta OS=Homo sapiens GN=DGKQ PE=1 SV=2	23.76	control_1
Q9BX97	Plasmalemma vesicle-associated protein OS=Homo sapiens GN=PLVAP PE=2 SV=1	78.84	control_1
Q9P2D6	Protein FAM135A OS=Homo sapiens GN=FAM135A PE=1 SV=2	63.34	control_1
Q9P2D3	HEAT repeat-containing protein 5B OS=Homo sapiens GN=HEATR5B PE=1 SV=2	37.49	control_1
Q8IZF4	Adhesion G-protein coupled receptor G5 OS=Homo sapiens GN=ADGRG5 PE=2 SV=3	19.52	control_1
C9JN71	Zinc finger protein 878 OS=Homo sapiens GN=ZNF878 PE=3 SV=2	1.77	control_1
Q5TKA1	Protein lin-9 homolog OS=Homo sapiens GN=LIN9 PE=1 SV=1	1.39	control_1
Q9P2B4	CTTNBP2 N-terminal-like protein OS=Homo sapiens GN=CTTNBP2NL PE=1 SV=2	198.37	control_1
O43520	Phospholipid-transporting ATPase IC OS=Homo sapiens GN=ATP8B1 PE=1 SV=3	74.08	control_1
Q9BWT7	Caspase recruitment domain-containing protein 10 OS=Homo sapiens GN=CARD10 PE=2 SV=2	12.9	control_1
Q5JZY3	Ephrin type-A receptor 10 OS=Homo sapiens GN=EPHA10 PE=1 SV=2	111.54	control_1
O95995	Growth arrest-specific protein 8 OS=Homo sapiens GN=GAS8 PE=1 SV=1	77.48	control_1
Q6IE37	Ovostatin homolog 1 OS=Homo sapiens GN=OVOS1 PE=2 SV=2	12.75	control_1
Q6IE36	Ovostatin homolog 2 OS=Homo sapiens GN=OVOS2 PE=2 SV=2	4.58	control_1
Q9Y4E5	Zinc finger protein 451 OS=Homo sapiens GN=ZNF451 PE=1 SV=2	53.2	control_1
Q9Y4D1	Disheveled-associated activator of morphogenesis 1 OS=Homo sapiens GN=DAAM1 PE=1 SV=2	98.6	control_1
Q9P1Z3	Potassium/sodium hyperpolarization-activated cyclic nucleotide-gated channel 3 OS=Homo sapiens GN=HCN3 PE=2 SV=2	15.09	control_1
Q9P1Z2	Calcium-binding and coiled-coil domain-containing protein 1 OS=Homo sapiens GN=CALCOCO1 PE=1 SV=2	49.46	control_1
Q7Z2Z2	Elongation factor Tu GTP-binding domain-containing protein 1 OS=Homo sapiens GN=EFTUD1 PE=1 SV=2	98.63	control_1
Q9BWN1	Proline-rich protein 14 OS=Homo sapiens GN=PRR14 PE=1 SV=1	61.57	control_1
Q8TE12	LIM homeobox transcription factor 1-alpha OS=Homo sapiens GN=LMX1A PE=1 SV=1	21.98	control_1
Q9Y4B6	Protein VPRBP OS=Homo sapiens GN=VPRBP PE=1 SV=3	28.8	control_1
O95948	One cut domain family member 2 OS=Homo sapiens GN=ONECUT2 PE=2 SV=2	16.89	control_1
Q7Z2W4	Zinc finger CCCH-type antiviral protein 1 OS=Homo sapiens GN=ZC3HAV1 PE=1 SV=3	65.2	control_1
Q9NVE4	Coiled-coil domain-containing protein 87 OS=Homo sapiens GN=CCDC87 PE=1 SV=2	62.41	control_1
O15047	Histone-lysine N-methyltransferase SETD1A OS=Homo sapiens GN=SETD1A PE=1 SV=3	65.52	control_1
Q05193	Dynamin-1 OS=Homo sapiens GN=DNM1 PE=1 SV=2	12.59	control_1
P43490	Nicotinamide phosphoribosyltransferase OS=Homo sapiens GN=NAMPT PE=1 SV=1	83.5	control_1
Q9UJ70	N-acetyl-D-glucosamine kinase OS=Homo sapiens GN=NAGK PE=1 SV=4	186.82	control_1
O15037	Protein KHNYN OS=Homo sapiens GN=KHNYN PE=1 SV=3	55.89	control_1
Q9P253	Vacuolar protein sorting-associated protein 18 homolog OS=Homo sapiens GN=VPS18 PE=1 SV=2	16.35	control_1
P22102	Trifunctional purine biosynthetic protein adenosine-3 OS=Homo sapiens GN=GART PE=1 SV=1	56.38	control_1
O15015	Zinc finger protein 646 OS=Homo sapiens GN=ZNF646 PE=1 SV=1	154.32	control_1
Q9UIS9	Methyl-CpG-binding domain protein 1 OS=Homo sapiens GN=MBD1 PE=1 SV=2	9.85	control_1
P00367	Glutamate dehydrogenase 1, mitochondrial OS=Homo sapiens GN=GLUD1 PE=1 SV=2	21.81	control_1
O75093	Slit homolog 1 protein OS=Homo sapiens GN=SLIT1 PE=2 SV=4	78.94	control_1
Q504Q3	PAB-dependent poly(A)-specific ribonuclease subunit PAN2 OS=Homo sapiens GN=PAN2 PE=1 SV=3	27.06	control_1
O75081	Protein CBFA2T3 OS=Homo sapiens GN=CBFA2T3 PE=1 SV=2	15.41	control_1
Q96L34	MAP/microtubule affinity-regulating kinase 4 OS=Homo sapiens GN=MARK4 PE=1 SV=1	19.36	control_1
Q9H6R0	Putative ATP-dependent RNA helicase DHX33 OS=Homo sapiens GN=DHX33 PE=1 SV=2	2.53	control_1
Q9HCK4	Roundabout homolog 2 OS=Homo sapiens GN=ROBO2 PE=1 SV=2	36.82	control_1
Q9Y496	Kinesin-like protein KIF3A OS=Homo sapiens GN=KIF3A PE=1 SV=4	43.87	control_1
Q9HCJ0	Trinucleotide repeat-containing gene 6C protein OS=Homo sapiens GN=TNRC6C PE=1 SV=3	34.78	control_1
Q7L1W4	Volume-regulated anion channel subunit LRRC8D OS=Homo sapiens GN=LRRC8D PE=1 SV=1	2.57	control_1
Q9HCI6	Uncharacterized protein KIAA1586 OS=Homo sapiens GN=KIAA1586 PE=1 SV=2	128.29	control_1
Q7L1V2	Vacuolar fusion protein MON1 homolog B OS=Homo sapiens GN=MON1B PE=1 SV=1	55.08	control_1
Q9HCH3	Copine-5 OS=Homo sapiens GN=CPNE5 PE=1 SV=2	182.41	control_1
Q63HM2	Pecanex-like protein 4 OS=Homo sapiens GN=PCNXL4 PE=1 SV=4	12	control_1
Q96KN3	Homeobox protein PKNOX2 OS=Homo sapiens GN=PKNOX2 PE=2 SV=2	108.01	control_1
Q5T0W9	Protein FAM83B OS=Homo sapiens GN=FAM83B PE=1 SV=1	79.14	control_1
O75037	Kinesin-like protein KIF21B OS=Homo sapiens GN=KIF21B PE=1 SV=2	66.5	control_1
Q9NUX5	Protection of telomeres protein 1 OS=Homo sapiens GN=POT1 PE=1 SV=1	62.15	control_1
Q8IYM2	Schlafen family member 12 OS=Homo sapiens GN=SLFN12 PE=2 SV=2	117.7	control_1
O75027	ATP-binding cassette sub-family B member 7, mitochondrial OS=Homo sapiens GN=ABCB7 PE=1 SV=2	73.64	control_1
Q9NV88	Integrator complex subunit 9 OS=Homo sapiens GN=INTS9 PE=1 SV=2	20.78	control_1
Q8IYL2	Probable tRNA (uracil-O(2)-)-methyltransferase OS=Homo sapiens GN=TRMT44 PE=2 SV=2	14.88	control_1
Q9HCE7	E3 ubiquitin-protein ligase SMURF1 OS=Homo sapiens GN=SMURF1 PE=1 SV=2	22.9	control_1
Q9NV79	Protein-L-isoaspartate O-methyltransferase domain-containing protein 2 OS=Homo sapiens GN=PCMTD2 PE=2 SV=2	85.76	control_1
Q9NV70	Exocyst complex component 1 OS=Homo sapiens GN=EXOC1 PE=1 SV=4	29.96	control_1
Q8IYK2	Coiled-coil domain-containing protein 105 OS=Homo sapiens GN=CCDC105 PE=2 SV=3	109.44	control_1
Q9UIH9	Krueppel-like factor 15 OS=Homo sapiens GN=KLF15 PE=1 SV=1	8.49	control_1
Q8IYJ1	Copine-9 OS=Homo sapiens GN=CPNE9 PE=1 SV=3	39.22	control_1
Q04671	P protein OS=Homo sapiens GN=OCA2 PE=1 SV=2	13.93	control_1
O14523	C2 domain-containing protein 2-like OS=Homo sapiens GN=C2CD2L PE=1 SV=3	48.61	control_1
P50570	Dynamin-2 OS=Homo sapiens GN=DNM2 PE=1 SV=2	101.78	control_1
Q8IYI6	Exocyst complex component 8 OS=Homo sapiens GN=EXOC8 PE=1 SV=2	49.13	control_1
Q9NUT2	ATP-binding cassette sub-family B member 8, mitochondrial OS=Homo sapiens GN=ABCB8 PE=1 SV=3	33.15	control_1
Q9UIF9	Bromodomain adjacent to zinc finger domain protein 2A OS=Homo sapiens GN=BAZ2A PE=1 SV=4	20.49	control_1
O14514	Brain-specific angiogenesis inhibitor 1 OS=Homo sapiens GN=BAI1 PE=1 SV=2	36.59	control_1
Q6VVX0	Vitamin D 25-hydroxylase OS=Homo sapiens GN=CYP2R1 PE=1 SV=1	179.3	control_1
P52736	Zinc finger protein 133 OS=Homo sapiens GN=ZNF133 PE=1 SV=2	85.44	control_1
P05165	Propionyl-CoA carboxylase alpha chain, mitochondrial OS=Homo sapiens GN=PCCA PE=1 SV=4	31.58	control_1
A6H8M9	Cadherin-related family member 4 OS=Homo sapiens GN=CDHR4 PE=2 SV=1	19.08	control_1
Q9NUQ6	SPATS2-like protein OS=Homo sapiens GN=SPATS2L PE=1 SV=2	3.73	control_1
O43451	Maltase-glucoamylase, intestinal OS=Homo sapiens GN=MGAM PE=1 SV=5	15.79	control_1
P11802	Cyclin-dependent kinase 4 OS=Homo sapiens GN=CDK4 PE=1 SV=2	36.43	control_1
P40763	Signal transducer and activator of transcription 3 OS=Homo sapiens GN=STAT3 PE=1 SV=2	36.74	control_1
Q8IYE1	Coiled-coil domain-containing protein 13 OS=Homo sapiens GN=CCDC13 PE=1 SV=2	7.75	control_1
Q6IQ19	Centriole, cilia and spindle-associated protein OS=Homo sapiens GN=CCSAP PE=1 SV=2	112.08	control_1
Q9BVV6	Protein TALPID3 OS=Homo sapiens GN=KIAA0586 PE=1 SV=4	50.78	control_1
Q8N1F7	Nuclear pore complex protein Nup93 OS=Homo sapiens GN=NUP93 PE=1 SV=2	34.42	control_1
O43424	Glutamate receptor ionotropic, delta-2 OS=Homo sapiens GN=GRID2 PE=2 SV=2	83.71	control_1
Q6ZMU5	Tripartite motif-containing protein 72 OS=Homo sapiens GN=TRIM72 PE=1 SV=2	60.09	control_1
A6NJZ7	RIMS-binding protein 3C OS=Homo sapiens GN=RIMBP3C PE=1 SV=3	38.9	control_1
P48200	Iron-responsive element-binding protein 2 OS=Homo sapiens GN=IREB2 PE=1 SV=3	81.88	control_1
Q9HBZ2	Aryl hydrocarbon receptor nuclear translocator 2 OS=Homo sapiens GN=ARNT2 PE=1 SV=2	6.7	control_1
Q02410	Amyloid beta A4 precursor protein-binding family A member 1 OS=Homo sapiens GN=APBA1 PE=1 SV=3	40.68	control_1
P30939	5-hydroxytryptamine receptor 1F OS=Homo sapiens GN=HTR1F PE=2 SV=1	31.38	control_1
O00305	Voltage-dependent L-type calcium channel subunit beta-4 OS=Homo sapiens GN=CACNB4 PE=1 SV=2	119.52	control_1
Q8TD55	Pleckstrin homology domain-containing family O member 2 OS=Homo sapiens GN=PLEKHO2 PE=1 SV=1	258.12	control_1
P18850	Cyclic AMP-dependent transcription factor ATF-6 alpha OS=Homo sapiens GN=ATF6 PE=1 SV=3	152.2	control_1
Q8N1B4	Vacuolar protein sorting-associated protein 52 homolog OS=Homo sapiens GN=VPS52 PE=1 SV=1	44.38	control_1
P30926	Neuronal acetylcholine receptor subunit beta-4 OS=Homo sapiens GN=CHRNB4 PE=1 SV=2	44.48	control_1
O60391	Glutamate receptor ionotropic, NMDA 3B OS=Homo sapiens GN=GRIN3B PE=2 SV=2	25.48	control_1
Q8WZ64	Arf-GAP with Rho-GAP domain, ANK repeat and PH domain-containing protein 2 OS=Homo sapiens GN=ARAP2 PE=1 SV=3	61.27	control_1
P22087	rRNA 2'-O-methyltransferase fibrillarin OS=Homo sapiens GN=FBL PE=1 SV=2	45.09	control_1
Q8WZ60	Kelch-like protein 6 OS=Homo sapiens GN=KLHL6 PE=1 SV=3	17.01	control_1
Q9HC56	Protocadherin-9 OS=Homo sapiens GN=PCDH9 PE=1 SV=2	15.89	control_1
O60359	Voltage-dependent calcium channel gamma-3 subunit OS=Homo sapiens GN=CACNG3 PE=2 SV=1	25.05	control_1
A8MY62	Putative beta-lactamase-like 1 OS=Homo sapiens GN=LACTBL1 PE=2 SV=2	24.47	control_1
Q86YV9	Hermansky-Pudlak syndrome 6 protein OS=Homo sapiens GN=HPS6 PE=1 SV=1	129.13	control_1
Q86YV0	RAS protein activator like-3 OS=Homo sapiens GN=RASAL3 PE=1 SV=2	63.93	control_1
Q5EB52	Mesoderm-specific transcript homolog protein OS=Homo sapiens GN=MEST PE=2 SV=2	175.76	control_1
O95841	Angiopoietin-related protein 1 OS=Homo sapiens GN=ANGPTL1 PE=2 SV=1	34	control_1
Q6AI08	HEAT repeat-containing protein 6 OS=Homo sapiens GN=HEATR6 PE=1 SV=1	15.84	control_1
Q9UHW9	Solute carrier family 12 member 6 OS=Homo sapiens GN=SLC12A6 PE=1 SV=2	116.62	control_1
O60333	Kinesin-like protein KIF1B OS=Homo sapiens GN=KIF1B PE=1 SV=5	56.28	control_1
P10071	Transcriptional activator GLI3 OS=Homo sapiens GN=GLI3 PE=1 SV=6	41.34	control_1
Q8N0Z6	Tetratricopeptide repeat protein 5 OS=Homo sapiens GN=TTC5 PE=1 SV=2	404.86	control_1
P49916	DNA ligase 3 OS=Homo sapiens GN=LIG3 PE=1 SV=2	18.37	control_1
Q8IXW5	Putative RNA polymerase II subunit B1 CTD phosphatase RPAP2 OS=Homo sapiens GN=RPAP2 PE=1 SV=1	2.5	control_1
Q96K83	Zinc finger protein 521 OS=Homo sapiens GN=ZNF521 PE=1 SV=1	8.7	control_1
Q9HC16	DNA dC->dU-editing enzyme APOBEC-3G OS=Homo sapiens GN=APOBEC3G PE=1 SV=1	102.24	control_1
O60318	Germinal-center associated nuclear protein OS=Homo sapiens GN=MCM3AP PE=1 SV=2	32.23	control_1
P14410	Sucrase-isomaltase, intestinal OS=Homo sapiens GN=SI PE=1 SV=6	35.93	control_1
Q8N0X7	Spartin OS=Homo sapiens GN=SPG20 PE=1 SV=1	45.18	control_1
Q86YQ8	Copine-8 OS=Homo sapiens GN=CPNE8 PE=1 SV=2	10.85	control_1
Q9H668	CST complex subunit STN1 OS=Homo sapiens GN=OBFC1 PE=1 SV=2	14.58	control_1
Q96K58	Zinc finger protein 668 OS=Homo sapiens GN=ZNF668 PE=1 SV=3	64.74	control_1
Q8WYK0	Acyl-coenzyme A thioesterase 12 OS=Homo sapiens GN=ACOT12 PE=1 SV=1	60.15	control_1
Q9H649	Putative methyltransferase NSUN3 OS=Homo sapiens GN=NSUN3 PE=2 SV=1	43.59	control_1
Q8IXS2	Coiled-coil domain-containing protein 65 OS=Homo sapiens GN=CCDC65 PE=1 SV=2	39.23	control_1
P29083	General transcription factor IIE subunit 1 OS=Homo sapiens GN=GTF2E1 PE=1 SV=2	50.91	control_1
Q8IXR9	Uncharacterized protein C12orf56 OS=Homo sapiens GN=C12orf56 PE=2 SV=3	30.13	control_1
P21583	Kit ligand OS=Homo sapiens GN=KITLG PE=1 SV=1	24.5	control_1
P21580	Tumor necrosis factor alpha-induced protein 3 OS=Homo sapiens GN=TNFAIP3 PE=1 SV=1	29.59	control_1
Q8IY17	Neuropathy target esterase OS=Homo sapiens GN=PNPLA6 PE=1 SV=2	35.52	control_1
Q96K12	Fatty acyl-CoA reductase 2 OS=Homo sapiens GN=FAR2 PE=2 SV=1	98.42	control_1
P62495	Eukaryotic peptide chain release factor subunit 1 OS=Homo sapiens GN=ETF1 PE=1 SV=3	152.57	control_1
Q96JP0	Protein fem-1 homolog C OS=Homo sapiens GN=FEM1C PE=1 SV=1	71.52	control_1
Q9NTZ6	RNA-binding protein 12 OS=Homo sapiens GN=RBM12 PE=1 SV=1	9.77	control_1
Q8N119	Matrix metalloproteinase-21 OS=Homo sapiens GN=MMP21 PE=2 SV=2	44	control_1
Q9HBG4	V-type proton ATPase 116 kDa subunit a isoform 4 OS=Homo sapiens GN=ATP6V0A4 PE=1 SV=2	40.04	control_1
Q9P0K7	Ankycorbin OS=Homo sapiens GN=RAI14 PE=1 SV=2	61.15	control_1
P21554	Cannabinoid receptor 1 OS=Homo sapiens GN=CNR1 PE=1 SV=1	19.99	control_1
Q9Y2S7	Polymerase delta-interacting protein 2 OS=Homo sapiens GN=POLDIP2 PE=1 SV=1	26.95	control_1
Q9UHJ3	Scm-like with four MBT domains protein 1 OS=Homo sapiens GN=SFMBT1 PE=1 SV=2	62.91	control_1
P54855	UDP-glucuronosyltransferase 2B15 OS=Homo sapiens GN=UGT2B15 PE=1 SV=3	19.36	control_1
Q9Y334	von Willebrand factor A domain-containing protein 7 OS=Homo sapiens GN=VWA7 PE=2 SV=4	7.15	control_1
Q9Y2R2	Tyrosine-protein phosphatase non-receptor type 22 OS=Homo sapiens GN=PTPN22 PE=1 SV=2	26.16	control_1
Q9UHI6	Probable ATP-dependent RNA helicase DDX20 OS=Homo sapiens GN=DDX20 PE=1 SV=2	15.56	control_1
Q8IXJ9	Putative Polycomb group protein ASXL1 OS=Homo sapiens GN=ASXL1 PE=1 SV=3	51.81	control_1
Q96JJ7	Protein disulfide-isomerase TMX3 OS=Homo sapiens GN=TMX3 PE=1 SV=2	9.98	control_1
P52657	Transcription initiation factor IIA subunit 2 OS=Homo sapiens GN=GTF2A2 PE=1 SV=1	532.38	control_1
Q9UHG3	Prenylcysteine oxidase 1 OS=Homo sapiens GN=PCYOX1 PE=1 SV=3	51.99	control_1
P17032	Zinc finger protein 37A OS=Homo sapiens GN=ZNF37A PE=2 SV=3	6.48	control_1
O43379	WD repeat-containing protein 62 OS=Homo sapiens GN=WDR62 PE=1 SV=4	10.54	control_1
Q6WCQ1	Myosin phosphatase Rho-interacting protein OS=Homo sapiens GN=MPRIP PE=1 SV=3	16.63	control_1
O00268	Transcription initiation factor TFIID subunit 4 OS=Homo sapiens GN=TAF4 PE=1 SV=2	143.54	control_1
P48147	Prolyl endopeptidase OS=Homo sapiens GN=PREP PE=1 SV=2	3.34	control_1
Q8IXF0	Neuronal PAS domain-containing protein 3 OS=Homo sapiens GN=NPAS3 PE=2 SV=1	149.47	control_1
A1A4S6	Rho GTPase-activating protein 10 OS=Homo sapiens GN=ARHGAP10 PE=1 SV=1	37.84	control_1
Q9UHC9	Niemann-Pick C1-like protein 1 OS=Homo sapiens GN=NPC1L1 PE=1 SV=2	16.15	control_1
Q96JE9	Microtubule-associated protein 6 OS=Homo sapiens GN=MAP6 PE=1 SV=2	68.28	control_1
Q5TIA1	Meiosis inhibitor protein 1 OS=Homo sapiens GN=MEI1 PE=2 SV=2	24.5	control_1
Q9Y2K6	Ubiquitin carboxyl-terminal hydrolase 20 OS=Homo sapiens GN=USP20 PE=1 SV=2	4.28	control_1
Q6PCB5	Round spermatid basic protein 1-like protein OS=Homo sapiens GN=RSBN1L PE=1 SV=2	66.26	control_1
O00232	26S proteasome non-ATPase regulatory subunit 12 OS=Homo sapiens GN=PSMD12 PE=1 SV=3	39.83	control_1
P28562	Dual specificity protein phosphatase 1 OS=Homo sapiens GN=DUSP1 PE=1 SV=3	106.83	control_1
Q8WXX7	Autism susceptibility gene 2 protein OS=Homo sapiens GN=AUTS2 PE=1 SV=1	64.84	control_1
Q96JB2	Conserved oligomeric Golgi complex subunit 3 OS=Homo sapiens GN=COG3 PE=1 SV=3	143.07	control_1
Q5VWT5	Uncharacterized protein C1orf168 OS=Homo sapiens GN=C1orf168 PE=2 SV=1	73.4	control_1
Q9Y2H9	Microtubule-associated serine/threonine-protein kinase 1 OS=Homo sapiens GN=MAST1 PE=1 SV=2	84.8	control_1
Q9Y2H5	Pleckstrin homology domain-containing family A member 6 OS=Homo sapiens GN=PLEKHA6 PE=1 SV=4	38.57	control_1
O43307	Rho guanine nucleotide exchange factor 9 OS=Homo sapiens GN=ARHGEF9 PE=1 SV=3	42.26	control_1
O43304	SEC14-like protein 5 OS=Homo sapiens GN=SEC14L5 PE=2 SV=3	29.53	control_1
O43300	Leucine-rich repeat transmembrane neuronal protein 2 OS=Homo sapiens GN=LRRTM2 PE=2 SV=3	188.55	control_1
Q69YQ0	Cytospin-A OS=Homo sapiens GN=SPECC1L PE=1 SV=2	36.37	control_1
Q9Y2G9	Protein strawberry notch homolog 2 OS=Homo sapiens GN=SBNO2 PE=2 SV=3	22.02	control_1
Q9Y2G7	Zinc finger protein 30 homolog OS=Homo sapiens GN=ZFP30 PE=2 SV=1	24.77	control_1
O95789	Zinc finger MYM-type protein 6 OS=Homo sapiens GN=ZMYM6 PE=2 SV=2	34.16	control_1
A6NJ78	Probable methyltransferase-like protein 15 OS=Homo sapiens GN=METTL15 PE=1 SV=1	177.4	control_1
A8MWX3	Putative WAS protein family homolog 4 OS=Homo sapiens GN=WASH4P PE=5 SV=1	17.47	control_1
Q9Y2D9	Zinc finger protein 652 OS=Homo sapiens GN=ZNF652 PE=1 SV=3	192.3	control_1
Q5JY77	G-protein coupled receptor-associated sorting protein 1 OS=Homo sapiens GN=GPRASP1 PE=1 SV=3	23.21	control_1
Q8WXS8	A disintegrin and metalloproteinase with thrombospondin motifs 14 OS=Homo sapiens GN=ADAMTS14 PE=2 SV=2	39.19	control_1
Q9HB65	RNA polymerase II elongation factor ELL3 OS=Homo sapiens GN=ELL3 PE=1 SV=2	116.31	control_1
Q9HAU4	E3 ubiquitin-protein ligase SMURF2 OS=Homo sapiens GN=SMURF2 PE=1 SV=1	82.75	control_1
O95757	Heat shock 70 kDa protein 4L OS=Homo sapiens GN=HSPA4L PE=1 SV=3	16.38	control_1
Q8WXR4	Myosin-IIIb OS=Homo sapiens GN=MYO3B PE=2 SV=4	37.08	control_1
Q9HB58	Sp110 nuclear body protein OS=Homo sapiens GN=SP110 PE=1 SV=5	14.37	control_1
Q9HAT8	E3 ubiquitin-protein ligase pellino homolog 2 OS=Homo sapiens GN=PELI2 PE=1 SV=1	144.61	control_1
Q9HAT2	Sialate O-acetylesterase OS=Homo sapiens GN=SIAE PE=1 SV=1	57.33	control_1
P06756	Integrin alpha-V OS=Homo sapiens GN=ITGAV PE=1 SV=2	44.28	control_1
Q8TC05	Nuclear protein MDM1 OS=Homo sapiens GN=MDM1 PE=1 SV=2	84.17	control_1
Q8IWZ8	SURP and G-patch domain-containing protein 1 OS=Homo sapiens GN=SUGP1 PE=1 SV=2	72.45	control_1
Q9H4Z3	Phosphorylated CTD-interacting factor 1 OS=Homo sapiens GN=PCIF1 PE=1 SV=1	26.36	control_1
Q86XT9	Insulin-like growth factor-binding protein 3 receptor OS=Homo sapiens GN=TMEM219 PE=1 SV=1	34.21	control_1
O60231	Putative pre-mRNA-splicing factor ATP-dependent RNA helicase DHX16 OS=Homo sapiens GN=DHX16 PE=1 SV=2	44.84	control_1
Q69YH5	Cell division cycle-associated protein 2 OS=Homo sapiens GN=CDCA2 PE=1 SV=2	65.11	control_1
Q5VWJ9	Sorting nexin-30 OS=Homo sapiens GN=SNX30 PE=1 SV=1	7.56	control_1
Q09328	Alpha-1,6-mannosylglycoprotein 6-beta-N-acetylglucosaminyltransferase A OS=Homo sapiens GN=MGAT5 PE=2 SV=1	25.45	control_1
Q86XR2	Niban-like protein 2 OS=Homo sapiens GN=FAM129C PE=1 SV=2	164.07	control_1
Q86Y26	NUT family member 1 OS=Homo sapiens GN=NUTM1 PE=1 SV=2	63.35	control_1
A2RUS2	DENN domain-containing protein 3 OS=Homo sapiens GN=DENND3 PE=1 SV=2	43.95	control_1
Q86Y22	Collagen alpha-1(XXIII) chain OS=Homo sapiens GN=COL23A1 PE=1 SV=1	106.76	control_1
Q9HAN9	Nicotinamide/nicotinic acid mononucleotide adenylyltransferase 1 OS=Homo sapiens GN=NMNAT1 PE=1 SV=1	16.24	control_1
Q9UGP5	DNA polymerase lambda OS=Homo sapiens GN=POLL PE=1 SV=1	6.8	control_1
Q8WXI9	Transcriptional repressor p66-beta OS=Homo sapiens GN=GATAD2B PE=1 SV=1	64.56	control_1
P31267	Homeobox protein Hox-A6 OS=Homo sapiens GN=HOXA6 PE=2 SV=2	38.31	control_1
P31260	Homeobox protein Hox-A10 OS=Homo sapiens GN=HOXA10 PE=1 SV=3	4.98	control_1
P35610	Sterol O-acyltransferase 1 OS=Homo sapiens GN=SOAT1 PE=1 SV=3	22.74	control_1
Q2TAZ0	Autophagy-related protein 2 homolog A OS=Homo sapiens GN=ATG2A PE=1 SV=3	38.29	control_1
Q8TBE0	Bromo adjacent homology domain-containing 1 protein OS=Homo sapiens GN=BAHD1 PE=1 SV=2	5.6	control_1
Q9UGM5	Fetuin-B OS=Homo sapiens GN=FETUB PE=1 SV=2	101.98	control_1
P35606	Coatomer subunit beta' OS=Homo sapiens GN=COPB2 PE=1 SV=2	36.65	control_1
P31249	Homeobox protein Hox-D3 OS=Homo sapiens GN=HOXD3 PE=1 SV=3	11.81	control_1
Q9Y267	Solute carrier family 22 member 14 OS=Homo sapiens GN=SLC22A14 PE=2 SV=4	11.24	control_1
Q9NSY0	Nuclear receptor-binding protein 2 OS=Homo sapiens GN=NRBP2 PE=2 SV=2	16.74	control_1
P23634	Plasma membrane calcium-transporting ATPase 4 OS=Homo sapiens GN=ATP2B4 PE=1 SV=2	32.32	control_1
P41002	Cyclin-F OS=Homo sapiens GN=CCNF PE=1 SV=2	32.77	control_1
P33402	Guanylate cyclase soluble subunit alpha-2 OS=Homo sapiens GN=GUCY1A2 PE=2 SV=1	93.32	control_1
Q14289	Protein-tyrosine kinase 2-beta OS=Homo sapiens GN=PTK2B PE=1 SV=2	54.24	control_1
Q68DV7	E3 ubiquitin-protein ligase RNF43 OS=Homo sapiens GN=RNF43 PE=1 SV=1	24.06	control_1
O43294	Transforming growth factor beta-1-induced transcript 1 protein OS=Homo sapiens GN=TGFB1I1 PE=1 SV=2	45.48	control_1
Q02297	Pro-neuregulin-1, membrane-bound isoform OS=Homo sapiens GN=NRG1 PE=1 SV=3	29.03	control_1
Q5SZL2	Centrosomal protein of 85 kDa-like OS=Homo sapiens GN=CEP85L PE=1 SV=1	50.45	control_1
O43280	Trehalase OS=Homo sapiens GN=TREH PE=1 SV=2	34.62	control_1
Q08828	Adenylate cyclase type 1 OS=Homo sapiens GN=ADCY1 PE=1 SV=2	15.69	control_1
Q92952	Small conductance calcium-activated potassium channel protein 1 OS=Homo sapiens GN=KCNN1 PE=2 SV=2	87.03	control_1
Q14242	P-selectin glycoprotein ligand 1 OS=Homo sapiens GN=SELPLG PE=1 SV=1	28.73	control_1
Q16401	26S proteasome non-ATPase regulatory subunit 5 OS=Homo sapiens GN=PSMD5 PE=1 SV=3	44.45	control_1
P54707	Potassium-transporting ATPase alpha chain 2 OS=Homo sapiens GN=ATP12A PE=1 SV=3	48.28	control_1
P01833	Polymeric immunoglobulin receptor OS=Homo sapiens GN=PIGR PE=1 SV=4	47.23	control_1
Q8IWF6	Protein DENND6A OS=Homo sapiens GN=DENND6A PE=1 SV=1	68.37	control_1
Q8IWF2	FAD-dependent oxidoreductase domain-containing protein 2 OS=Homo sapiens GN=FOXRED2 PE=1 SV=1	102.45	control_1
Q5U5Z8	Cytosolic carboxypeptidase 2 OS=Homo sapiens GN=AGBL2 PE=1 SV=2	227.9	control_1
Q9H4E7	Differentially expressed in FDCP 6 homolog OS=Homo sapiens GN=DEF6 PE=1 SV=1	43.65	control_1
Q8IWE5	Pleckstrin homology domain-containing family M member 2 OS=Homo sapiens GN=PLEKHM2 PE=1 SV=2	216.57	control_1
Q14203	Dynactin subunit 1 OS=Homo sapiens GN=DCTN1 PE=1 SV=3	120.36	control_1
A2RUB6	Coiled-coil domain-containing protein 66 OS=Homo sapiens GN=CCDC66 PE=1 SV=4	188.54	control_1
Q02246	Contactin-2 OS=Homo sapiens GN=CNTN2 PE=1 SV=1	86.66	control_1
Q02241	Kinesin-like protein KIF23 OS=Homo sapiens GN=KIF23 PE=1 SV=3	158.1	control_1
Q9H4D0	Calsyntenin-2 OS=Homo sapiens GN=CLSTN2 PE=1 SV=2	18.31	control_1
Q8WWZ4	ATP-binding cassette sub-family A member 10 OS=Homo sapiens GN=ABCA10 PE=2 SV=3	37.9	control_1
Q92902	Hermansky-Pudlak syndrome 1 protein OS=Homo sapiens GN=HPS1 PE=1 SV=2	59.94	control_1
Q92900	Regulator of nonsense transcripts 1 OS=Homo sapiens GN=UPF1 PE=1 SV=2	1.76	control_1
Q8TB72	Pumilio homolog 2 OS=Homo sapiens GN=PUM2 PE=1 SV=2	25.41	control_1
Q9HA92	Radical S-adenosyl methionine domain-containing protein 1, mitochondrial OS=Homo sapiens GN=RSAD1 PE=2 SV=2	146.12	control_1
P08865	40S ribosomal protein SA OS=Homo sapiens GN=RPSA PE=1 SV=4	216.23	control_1
Q13772	Nuclear receptor coactivator 4 OS=Homo sapiens GN=NCOA4 PE=1 SV=1	81.77	control_1
P20936	Ras GTPase-activating protein 1 OS=Homo sapiens GN=RASA1 PE=1 SV=1	107.42	control_1
Q8WWT9	Solute carrier family 13 member 3 OS=Homo sapiens GN=SLC13A3 PE=1 SV=1	34.28	control_1
Q8TAQ5	Zinc finger protein 420 OS=Homo sapiens GN=ZNF420 PE=1 SV=1	14.52	control_1
Q8TB22	Spermatogenesis-associated protein 20 OS=Homo sapiens GN=SPATA20 PE=2 SV=3	175.17	control_1
Q8NHQ1	Centrosomal protein of 70 kDa OS=Homo sapiens GN=CEP70 PE=1 SV=2	66.69	control_1
Q15937	Zinc finger protein 79 OS=Homo sapiens GN=ZNF79 PE=1 SV=2	71.42	control_1
P16444	Dipeptidase 1 OS=Homo sapiens GN=DPEP1 PE=1 SV=3	52.92	control_1
P59537	Taste receptor type 2 member 43 OS=Homo sapiens GN=TAS2R43 PE=2 SV=2	194.66	control_1
Q13751	Laminin subunit beta-3 OS=Homo sapiens GN=LAMB3 PE=1 SV=1	16.69	control_1
Q8TAP6	Centrosomal protein of 76 kDa OS=Homo sapiens GN=CEP76 PE=1 SV=1	28.14	control_1
Q9NSG2	Uncharacterized protein C1orf112 OS=Homo sapiens GN=C1orf112 PE=1 SV=1	9.64	control_1
P55160	Nck-associated protein 1-like OS=Homo sapiens GN=NCKAP1L PE=1 SV=3	10.97	control_1
Q13733	Sodium/potassium-transporting ATPase subunit alpha-4 OS=Homo sapiens GN=ATP1A4 PE=1 SV=3	39.3	control_1
Q9NSD9	Phenylalanine--tRNA ligase beta subunit OS=Homo sapiens GN=FARSB PE=1 SV=3	93.41	control_1
Q9H488	GDP-fucose protein O-fucosyltransferase 1 OS=Homo sapiens GN=POFUT1 PE=1 SV=1	25.02	control_1
Q58FF3	Putative endoplasmin-like protein OS=Homo sapiens GN=HSP90B2P PE=5 SV=1	17.49	control_1
Q8IVW6	AT-rich interactive domain-containing protein 3B OS=Homo sapiens GN=ARID3B PE=1 SV=2	18.08	control_1
Q8IVW4	Cyclin-dependent kinase-like 3 OS=Homo sapiens GN=CDKL3 PE=1 SV=1	23.81	control_1
P14210	Hepatocyte growth factor OS=Homo sapiens GN=HGF PE=1 SV=2	26.55	control_1
Q496A3	Spermatogenesis-associated serine-rich protein 1 OS=Homo sapiens GN=SPATS1 PE=2 SV=2	18.58	control_1
Q8TAK5	GA-binding protein subunit beta-2 OS=Homo sapiens GN=GABPB2 PE=1 SV=1	99.8	control_1
Q96I76	G patch domain-containing protein 3 OS=Homo sapiens GN=GPATCH3 PE=2 SV=1	7.29	control_1
Q8IW75	Serpin A12 OS=Homo sapiens GN=SERPINA12 PE=1 SV=1	24.93	control_1
P35558	Phosphoenolpyruvate carboxykinase, cytosolic [GTP] OS=Homo sapiens GN=PCK1 PE=1 SV=3	112.48	control_1
Q86WP2	Vasculin OS=Homo sapiens GN=GPBP1 PE=1 SV=1	101.38	control_1
Q9H3T3	Semaphorin-6B OS=Homo sapiens GN=SEMA6B PE=1 SV=4	24.36	control_1
Q5TGP6	Maestro heat-like repeat-containing protein family member 9 OS=Homo sapiens GN=MROH9 PE=2 SV=1	67.95	control_1
Q96I36	Cytochrome c oxidase assembly protein COX14 OS=Homo sapiens GN=COX14 PE=1 SV=1	166.08	control_1
Q07002	Cyclin-dependent kinase 18 OS=Homo sapiens GN=CDK18 PE=1 SV=3	53.56	control_1
P13797	Plastin-3 OS=Homo sapiens GN=PLS3 PE=1 SV=4	148.29	control_1
P35527	Keratin, type I cytoskeletal 9 OS=Homo sapiens GN=KRT9 PE=1 SV=3	19.01	control_1
P13796	Plastin-2 OS=Homo sapiens GN=LCP1 PE=1 SV=6	56.06	control_1
Q8TAF3	WD repeat-containing protein 48 OS=Homo sapiens GN=WDR48 PE=1 SV=1	57.53	control_1
Q9H3Q1	Cdc42 effector protein 4 OS=Homo sapiens GN=CDC42EP4 PE=1 SV=1	17.21	control_1
Q9BTC8	Metastasis-associated protein MTA3 OS=Homo sapiens GN=MTA3 PE=1 SV=2	22.46	control_1
P23560	Brain-derived neurotrophic factor OS=Homo sapiens GN=BDNF PE=1 SV=1	71.28	control_1
Q96I15	Selenocysteine lyase OS=Homo sapiens GN=SCLY PE=1 SV=4	3.12	control_1
Q8WWF5	Zinc/RING finger protein 4 OS=Homo sapiens GN=ZNRF4 PE=2 SV=3	49.9	control_1
Q68CZ1	Protein fantom OS=Homo sapiens GN=RPGRIP1L PE=1 SV=2	97.26	control_1
Q14195	Dihydropyrimidinase-related protein 3 OS=Homo sapiens GN=DPYSL3 PE=1 SV=1	61.79	control_1
Q8TAB3	Protocadherin-19 OS=Homo sapiens GN=PCDH19 PE=1 SV=3	80.02	control_1
P07093	Glia-derived nexin OS=Homo sapiens GN=SERPINE2 PE=1 SV=1	8.04	control_1
Q6P4Q7	Metal transporter CNNM4 OS=Homo sapiens GN=CNNM4 PE=1 SV=3	123.31	control_1
Q92889	DNA repair endonuclease XPF OS=Homo sapiens GN=ERCC4 PE=1 SV=3	40.85	control_1
P15918	V(D)J recombination-activating protein 1 OS=Homo sapiens GN=RAG1 PE=1 SV=2	48.82	control_1
Q86WG5	Myotubularin-related protein 13 OS=Homo sapiens GN=SBF2 PE=1 SV=1	60.03	control_1
Q9NS73	MAP3K12-binding inhibitory protein 1 OS=Homo sapiens GN=MBIP PE=1 SV=2	88.38	control_1
P54646	5'-AMP-activated protein kinase catalytic subunit alpha-2 OS=Homo sapiens GN=PRKAA2 PE=1 SV=2	20.98	control_1
O43184	Disintegrin and metalloproteinase domain-containing protein 12 OS=Homo sapiens GN=ADAM12 PE=1 SV=3	34.12	control_1
Q8IVI9	Nostrin OS=Homo sapiens GN=NOSTRIN PE=1 SV=2	15.25	control_1
Q92859	Neogenin OS=Homo sapiens GN=NEO1 PE=1 SV=2	25.88	control_1
Q92854	Semaphorin-4D OS=Homo sapiens GN=SEMA4D PE=1 SV=1	91.25	control_1
Q06546	GA-binding protein alpha chain OS=Homo sapiens GN=GABPA PE=1 SV=1	51.7	control_1
Q8IVH8	Mitogen-activated protein kinase kinase kinase kinase 3 OS=Homo sapiens GN=MAP4K3 PE=1 SV=1	76.02	control_1
Q1KMD3	Heterogeneous nuclear ribonucleoprotein U-like protein 2 OS=Homo sapiens GN=HNRNPUL2 PE=1 SV=1	24.14	control_1
Q92833	Protein Jumonji OS=Homo sapiens GN=JARID2 PE=1 SV=2	47.16	control_1
P52429	Diacylglycerol kinase epsilon OS=Homo sapiens GN=DGKE PE=1 SV=1	76.2	control_1
Q9UFD9	RIMS-binding protein 3A OS=Homo sapiens GN=RIMBP3 PE=1 SV=4	42.02	control_1
Q02156	Protein kinase C epsilon type OS=Homo sapiens GN=PRKCE PE=1 SV=1	51.45	control_1
Q68CP9	AT-rich interactive domain-containing protein 2 OS=Homo sapiens GN=ARID2 PE=1 SV=2	13.67	control_1
Q92806	G protein-activated inward rectifier potassium channel 3 OS=Homo sapiens GN=KCNJ9 PE=2 SV=2	60.14	control_1
Q8WVZ7	E3 ubiquitin-protein ligase RNF133 OS=Homo sapiens GN=RNF133 PE=2 SV=1	121.8	control_1
Q68D06	Schlafen family member 13 OS=Homo sapiens GN=SLFN13 PE=2 SV=1	72.84	control_1
Q9BSU1	UPF0183 protein C16orf70 OS=Homo sapiens GN=C16orf70 PE=1 SV=1	45.37	control_1
Q60I27	ALS2 C-terminal-like protein OS=Homo sapiens GN=ALS2CL PE=1 SV=1	43.22	control_1
Q9NRM7	Serine/threonine-protein kinase LATS2 OS=Homo sapiens GN=LATS2 PE=1 SV=2	54.7	control_1
P28340	DNA polymerase delta catalytic subunit OS=Homo sapiens GN=POLD1 PE=1 SV=2	129	control_1
P28332	Alcohol dehydrogenase 6 OS=Homo sapiens GN=ADH6 PE=1 SV=2	43.77	control_1
Q5XX13	F-box/WD repeat-containing protein 10 OS=Homo sapiens GN=FBXW10 PE=2 SV=2	137.41	control_1
Q9NRJ5	Poly(A) polymerase beta OS=Homo sapiens GN=PAPOLB PE=2 SV=1	15.63	infected_1
Q9NRJ4	Tubby-related protein 4 OS=Homo sapiens GN=TULP4 PE=2 SV=2	16.95	infected_1
P98196	Probable phospholipid-transporting ATPase IH OS=Homo sapiens GN=ATP11A PE=1 SV=3	24.59	infected_1
Q6ZWJ8	Kielin/chordin-like protein OS=Homo sapiens GN=KCP PE=2 SV=2	66.17	infected_1
Q6NY19	KN motif and ankyrin repeat domain-containing protein 3 OS=Homo sapiens GN=KANK3 PE=1 SV=1	239.82	infected_1
Q6IA17	Single Ig IL-1-related receptor OS=Homo sapiens GN=SIGIRR PE=1 SV=3	27.62	infected_1
P98187	Cytochrome P450 4F8 OS=Homo sapiens GN=CYP4F8 PE=1 SV=1	3.3	infected_1
Q6NXP0	EF-hand calcium-binding domain-containing protein 12 OS=Homo sapiens GN=EFCAB12 PE=1 SV=1	30.23	infected_1
Q86W92	Liprin-beta-1 OS=Homo sapiens GN=PPFIBP1 PE=1 SV=2	87.14	infected_1
Q9NRH2	SNF-related serine/threonine-protein kinase OS=Homo sapiens GN=SNRK PE=1 SV=2	243.28	infected_1
P55081	Microfibrillar-associated protein 1 OS=Homo sapiens GN=MFAP1 PE=1 SV=2	164.22	infected_1
Q8WVS4	WD repeat-containing protein 60 OS=Homo sapiens GN=WDR60 PE=1 SV=3	220.53	infected_1
P98175	RNA-binding protein 10 OS=Homo sapiens GN=RBM10 PE=1 SV=3	70.41	infected_1
E9PB15	Putative protein PTGES3L OS=Homo sapiens GN=PTGES3L PE=5 SV=1	139.28	infected_1
Q15835	Rhodopsin kinase OS=Homo sapiens GN=GRK1 PE=1 SV=1	146.21	infected_1
A8MUV8	Putative zinc finger protein 727 OS=Homo sapiens GN=ZNF727 PE=5 SV=3	13.25	infected_1
P51957	Serine/threonine-protein kinase Nek4 OS=Homo sapiens GN=NEK4 PE=1 SV=2	88.57	infected_1
Q86VW0	SEC14 domain and spectrin repeat-containing protein 1 OS=Homo sapiens GN=SESTD1 PE=1 SV=2	19.12	infected_1
Q9NRG1	Phosphoribosyltransferase domain-containing protein 1 OS=Homo sapiens GN=PRTFDC1 PE=1 SV=1	15.71	infected_1
P55072	Transitional endoplasmic reticulum ATPase OS=Homo sapiens GN=VCP PE=1 SV=4	74.08	infected_1
Q75QN2	Integrator complex subunit 8 OS=Homo sapiens GN=INTS8 PE=1 SV=1	32.43	infected_1
Q8WVR3	Uncharacterized protein C7orf43 OS=Homo sapiens GN=C7orf43 PE=1 SV=2	9.12	infected_1
Q15825	Neuronal acetylcholine receptor subunit alpha-6 OS=Homo sapiens GN=CHRNA6 PE=2 SV=1	148.52	infected_1
P18507	Gamma-aminobutyric acid receptor subunit gamma-2 OS=Homo sapiens GN=GABRG2 PE=1 SV=2	93.65	infected_1
P49642	DNA primase small subunit OS=Homo sapiens GN=PRIM1 PE=1 SV=1	140.71	infected_1
Q09161	Nuclear cap-binding protein subunit 1 OS=Homo sapiens GN=NCBP1 PE=1 SV=1	1.99	infected_1
Q8WW24	Tektin-4 OS=Homo sapiens GN=TEKT4 PE=1 SV=1	138.73	infected_1
Q8IUZ0	Leucine-rich repeat-containing protein 49 OS=Homo sapiens GN=LRRC49 PE=2 SV=2	22.88	infected_1
Q15814	Tubulin-specific chaperone C OS=Homo sapiens GN=TBCC PE=1 SV=2	165.58	infected_1
Q13634	Cadherin-18 OS=Homo sapiens GN=CDH18 PE=2 SV=1	61.53	infected_1
A5PL33	Protein KRBA1 OS=Homo sapiens GN=KRBA1 PE=1 SV=3	91.13	infected_1
Q5JVS0	Intracellular hyaluronan-binding protein 4 OS=Homo sapiens GN=HABP4 PE=1 SV=1	74.67	infected_1
Q6ZWE6	Pleckstrin homology domain-containing family M member 3 OS=Homo sapiens GN=PLEKHM3 PE=2 SV=2	139.68	infected_1
Q5QJE6	Deoxynucleotidyltransferase terminal-interacting protein 2 OS=Homo sapiens GN=DNTTIP2 PE=1 SV=2	237.61	infected_1
Q9H2X9	Solute carrier family 12 member 5 OS=Homo sapiens GN=SLC12A5 PE=2 SV=3	8.67	infected_1
Q96GX9	Methylthioribulose-1-phosphate dehydratase OS=Homo sapiens GN=APIP PE=1 SV=1	125.53	infected_1
Q86W50	Methyltransferase-like protein 16 OS=Homo sapiens GN=METTL16 PE=1 SV=2	194.7	infected_1
Q9H2X0	Chordin OS=Homo sapiens GN=CHRD PE=1 SV=2	32.26	infected_1
O95522	PRAME family member 12 OS=Homo sapiens GN=PRAMEF12 PE=3 SV=1	76.17	infected_1
P08709	Coagulation factor VII OS=Homo sapiens GN=F7 PE=1 SV=1	28.52	infected_1
Q13617	Cullin-2 OS=Homo sapiens GN=CUL2 PE=1 SV=2	37.33	infected_1
P43088	Prostaglandin F2-alpha receptor OS=Homo sapiens GN=PTGFR PE=1 SV=1	32.31	infected_1
Q13616	Cullin-1 OS=Homo sapiens GN=CUL1 PE=1 SV=2	71.96	infected_1
Q13615	Myotubularin-related protein 3 OS=Homo sapiens GN=MTMR3 PE=1 SV=3	86.72	infected_1
Q13613	Myotubularin-related protein 1 OS=Homo sapiens GN=MTMR1 PE=1 SV=4	29.08	infected_1
P49619	Diacylglycerol kinase gamma OS=Homo sapiens GN=DGKG PE=2 SV=3	97.11	infected_1
Q13609	Deoxyribonuclease gamma OS=Homo sapiens GN=DNASE1L3 PE=1 SV=1	91.17	infected_1
Q9H2V7	Protein spinster homolog 1 OS=Homo sapiens GN=SPNS1 PE=1 SV=1	133	infected_1
O75953	DnaJ homolog subfamily B member 5 OS=Homo sapiens GN=DNAJB5 PE=1 SV=1	47.06	infected_1
P78562	Phosphate-regulating neutral endopeptidase OS=Homo sapiens GN=PHEX PE=1 SV=1	26.05	infected_1
P78560	Death domain-containing protein CRADD OS=Homo sapiens GN=CRADD PE=1 SV=1	62.42	infected_1
Q8WVM0	Dimethyladenosine transferase 1, mitochondrial OS=Homo sapiens GN=TFB1M PE=1 SV=1	26.14	infected_1
Q86W25	NACHT, LRR and PYD domains-containing protein 13 OS=Homo sapiens GN=NLRP13 PE=2 SV=2	75.88	infected_1
Q9H2U9	Disintegrin and metalloproteinase domain-containing protein 7 OS=Homo sapiens GN=ADAM7 PE=1 SV=3	39.85	infected_1
Q9NRA8	Eukaryotic translation initiation factor 4E transporter OS=Homo sapiens GN=EIF4ENIF1 PE=1 SV=2	84.99	infected_1
O75943	Cell cycle checkpoint protein RAD17 OS=Homo sapiens GN=RAD17 PE=1 SV=2	71.03	infected_1
Q86VQ0	Lebercilin OS=Homo sapiens GN=LCA5 PE=1 SV=2	95.08	infected_1
P55017	Solute carrier family 12 member 3 OS=Homo sapiens GN=SLC12A3 PE=1 SV=3	45.35	infected_1
Q9H2U2	Inorganic pyrophosphatase 2, mitochondrial OS=Homo sapiens GN=PPA2 PE=1 SV=2	105.39	infected_1
P55011	Solute carrier family 12 member 2 OS=Homo sapiens GN=SLC12A2 PE=1 SV=1	100.88	infected_1
Q8IV61	Ras guanyl-releasing protein 3 OS=Homo sapiens GN=RASGRP3 PE=1 SV=1	31.23	infected_1
Q6PML9	Zinc transporter 9 OS=Homo sapiens GN=SLC30A9 PE=1 SV=1	129.22	infected_1
Q2M2Z5	Centrosomal protein kizuna OS=Homo sapiens GN=KIZ PE=1 SV=2	189.52	infected_1
Q9UF33	Ephrin type-A receptor 6 OS=Homo sapiens GN=EPHA6 PE=2 SV=3	115.06	infected_1
Q86VP3	Phosphofurin acidic cluster sorting protein 2 OS=Homo sapiens GN=PACS2 PE=1 SV=3	88.89	infected_1
Q8IV53	DENN domain-containing protein 1C OS=Homo sapiens GN=DENND1C PE=1 SV=1	78.19	infected_1
Q5VUG0	Scm-like with four MBT domains protein 2 OS=Homo sapiens GN=SFMBT2 PE=1 SV=1	17.15	infected_1
Q53G59	Kelch-like protein 12 OS=Homo sapiens GN=KLHL12 PE=1 SV=2	65.33	infected_1
Q76KX8	Zinc finger protein 534 OS=Homo sapiens GN=ZNF534 PE=2 SV=1	31.64	infected_1
Q3ZCT8	Kelch repeat and BTB domain-containing protein 12 OS=Homo sapiens GN=KBTBD12 PE=2 SV=2	19.28	infected_1
Q9H2S9	Zinc finger protein Eos OS=Homo sapiens GN=IKZF4 PE=1 SV=2	75.09	infected_1
P35442	Thrombospondin-2 OS=Homo sapiens GN=THBS2 PE=1 SV=2	57.82	infected_1
Q6P3X3	Tetratricopeptide repeat protein 27 OS=Homo sapiens GN=TTC27 PE=1 SV=1	41.07	infected_1
Q9H2S5	RING finger protein 39 OS=Homo sapiens GN=RNF39 PE=2 SV=2	213	infected_1
P78539	Sushi repeat-containing protein SRPX OS=Homo sapiens GN=SRPX PE=1 SV=1	23.54	infected_1
Q8IV48	3'-5' exoribonuclease 1 OS=Homo sapiens GN=ERI1 PE=1 SV=3	344.93	infected_1
Q8WVJ9	Twist-related protein 2 OS=Homo sapiens GN=TWIST2 PE=1 SV=1	264.26	infected_1
Q96H40	Zinc finger protein 486 OS=Homo sapiens GN=ZNF486 PE=2 SV=4	105.57	infected_1
P43034	Platelet-activating factor acetylhydrolase IB subunit alpha OS=Homo sapiens GN=PAFAH1B1 PE=1 SV=2	122.77	infected_1
Q6P3W6	Neuroblastoma breakpoint family member 10 OS=Homo sapiens GN=NBPF10 PE=2 SV=2	70.2	infected_1
Q76L83	Putative Polycomb group protein ASXL2 OS=Homo sapiens GN=ASXL2 PE=1 SV=1	52.66	infected_1
Q9H334	Forkhead box protein P1 OS=Homo sapiens GN=FOXP1 PE=1 SV=1	92.17	infected_1
Q8IV38	Ankyrin repeat and MYND domain-containing protein 2 OS=Homo sapiens GN=ANKMY2 PE=1 SV=1	29.92	infected_1
Q5JVL4	EF-hand domain-containing protein 1 OS=Homo sapiens GN=EFHC1 PE=1 SV=1	54.16	infected_1
Q8IUR7	Armadillo repeat-containing protein 8 OS=Homo sapiens GN=ARMC8 PE=1 SV=2	19.5	infected_1
Q52LA3	Protein lin-52 homolog OS=Homo sapiens GN=LIN52 PE=1 SV=1	65.02	infected_1
Q8IUR5	Transmembrane and TPR repeat-containing protein 1 OS=Homo sapiens GN=TMTC1 PE=1 SV=3	106.83	infected_1
P78524	Suppression of tumorigenicity 5 protein OS=Homo sapiens GN=ST5 PE=1 SV=3	42.86	infected_1
Q7KYR7	Butyrophilin subfamily 2 member A1 OS=Homo sapiens GN=BTN2A1 PE=1 SV=3	41.77	infected_1
Q96GQ7	Probable ATP-dependent RNA helicase DDX27 OS=Homo sapiens GN=DDX27 PE=1 SV=2	66.92	infected_1
Q5T9S5	Coiled-coil domain-containing protein 18 OS=Homo sapiens GN=CCDC18 PE=2 SV=1	68.2	infected_1
P35414	Apelin receptor OS=Homo sapiens GN=APLNR PE=1 SV=1	28.82	infected_1
Q6P461	Acyl-coenzyme A synthetase ACSM6, mitochondrial OS=Homo sapiens GN=ACSM6 PE=2 SV=3	44.93	infected_1
Q96GP6	Scavenger receptor class F member 2 OS=Homo sapiens GN=SCARF2 PE=1 SV=4	118.11	infected_1
Q8NGE3	Olfactory receptor 10P1 OS=Homo sapiens GN=OR10P1 PE=2 SV=1	66.05	infected_1
Q9H2P0	Activity-dependent neuroprotector homeobox protein OS=Homo sapiens GN=ADNP PE=1 SV=1	59.98	infected_1
P78504	Protein jagged-1 OS=Homo sapiens GN=JAG1 PE=1 SV=3	59.07	infected_1
P62191	26S protease regulatory subunit 4 OS=Homo sapiens GN=PSMC1 PE=1 SV=1	11.12	infected_1
Q6WN34	Chordin-like protein 2 OS=Homo sapiens GN=CHRDL2 PE=1 SV=1	42.74	infected_1
P43003	Excitatory amino acid transporter 1 OS=Homo sapiens GN=SLC1A3 PE=1 SV=1	121.99	infected_1
Q9H307	Pinin OS=Homo sapiens GN=PNN PE=1 SV=4	83.06	infected_1
Q9H306	Matrix metalloproteinase-27 OS=Homo sapiens GN=MMP27 PE=1 SV=2	168.46	infected_1
P11498	Pyruvate carboxylase, mitochondrial OS=Homo sapiens GN=PC PE=1 SV=2	72.27	infected_1
P13671	Complement component C6 OS=Homo sapiens GN=C6 PE=1 SV=3	47.8	infected_1
Q16288	NT-3 growth factor receptor OS=Homo sapiens GN=NTRK3 PE=1 SV=2	94.45	infected_1
Q49AR2	UPF0489 protein C5orf22 OS=Homo sapiens GN=C5orf22 PE=1 SV=2	25.95	infected_1
P31040	Succinate dehydrogenase [ubiquinone] flavoprotein subunit, mitochondrial OS=Homo sapiens GN=SDHA PE=1 SV=2	336.5	infected_1
A6NGG8	Uncharacterized protein C2orf71 OS=Homo sapiens GN=C2orf71 PE=1 SV=1	54.9	infected_1
P13667	Protein disulfide-isomerase A4 OS=Homo sapiens GN=PDIA4 PE=1 SV=2	137.24	infected_1
Q14093	Cylicin-2 OS=Homo sapiens GN=CYLC2 PE=2 SV=1	261.43	infected_1
P23434	Glycine cleavage system H protein, mitochondrial OS=Homo sapiens GN=GCSH PE=1 SV=2	104.26	infected_1
Q6P3R8	Serine/threonine-protein kinase Nek5 OS=Homo sapiens GN=NEK5 PE=2 SV=1	31.68	infected_1
Q9NR96	Toll-like receptor 9 OS=Homo sapiens GN=TLR9 PE=1 SV=2	14.05	infected_1
P56748	Claudin-8 OS=Homo sapiens GN=CLDN8 PE=1 SV=1	108.25	infected_1
Q9H2M3	S-methylmethionine--homocysteine S-methyltransferase BHMT2 OS=Homo sapiens GN=BHMT2 PE=1 SV=1	173.97	infected_1
Q9NQX3	Gephyrin OS=Homo sapiens GN=GPHN PE=1 SV=1	80.52	infected_1
Q5JVG2	Zinc finger protein 484 OS=Homo sapiens GN=ZNF484 PE=1 SV=1	74.69	infected_1
P11474	Steroid hormone receptor ERR1 OS=Homo sapiens GN=ESRRA PE=1 SV=3	26.99	infected_1
Q92796	Disks large homolog 3 OS=Homo sapiens GN=DLG3 PE=1 SV=2	120.6	infected_1
Q6UXK2	Immunoglobulin superfamily containing leucine-rich repeat protein 2 OS=Homo sapiens GN=ISLR2 PE=2 SV=1	46.08	infected_1
Q86VH2	Kinesin-like protein KIF27 OS=Homo sapiens GN=KIF27 PE=2 SV=1	54.36	infected_1
Q9NQW6	Actin-binding protein anillin OS=Homo sapiens GN=ANLN PE=1 SV=2	54.74	infected_1
Q9NQW5	Probable histone-lysine N-methyltransferase PRDM7 OS=Homo sapiens GN=PRDM7 PE=1 SV=2	134.27	infected_1
Q8IUL8	Cartilage intermediate layer protein 2 OS=Homo sapiens GN=CILP2 PE=2 SV=2	60.84	infected_1
Q9NQW1	Protein transport protein Sec31B OS=Homo sapiens GN=SEC31B PE=1 SV=1	49.73	infected_1
P56730	Neurotrypsin OS=Homo sapiens GN=PRSS12 PE=2 SV=2	110.49	infected_1
P46952	3-hydroxyanthranilate 3,4-dioxygenase OS=Homo sapiens GN=HAAO PE=1 SV=2	14.98	infected_1
Q17RQ9	NTPase KAP family P-loop domain-containing protein 1 OS=Homo sapiens GN=NKPD1 PE=2 SV=1	143.55	infected_1
Q9NQV8	PR domain zinc finger protein 8 OS=Homo sapiens GN=PRDM8 PE=2 SV=3	90.24	infected_1
Q9NQV7	Histone-lysine N-methyltransferase PRDM9 OS=Homo sapiens GN=PRDM9 PE=1 SV=2	176.11	infected_1
P13631	Retinoic acid receptor gamma OS=Homo sapiens GN=RARG PE=1 SV=1	11.85	infected_1
Q76KP1	N-acetyl-beta-glucosaminyl-glycoprotein 4-beta-N-acetylgalactosaminyltransferase 1 OS=Homo sapiens GN=B4GALNT4 PE=1 SV=1	45.92	infected_1
Q9NQV6	PR domain zinc finger protein 10 OS=Homo sapiens GN=PRDM10 PE=1 SV=3	30.7	infected_1
Q9H2K2	Tankyrase-2 OS=Homo sapiens GN=TNKS2 PE=1 SV=1	125.91	infected_1
Q92777	Synapsin-2 OS=Homo sapiens GN=SYN2 PE=2 SV=3	84.74	infected_1
Q6UXI7	Vitrin OS=Homo sapiens GN=VIT PE=2 SV=1	48.13	infected_1
Q9H2K0	Translation initiation factor IF-3, mitochondrial OS=Homo sapiens GN=MTIF3 PE=1 SV=4	42.3	infected_1
Q9NR71	Neutral ceramidase OS=Homo sapiens GN=ASAH2 PE=1 SV=2	26.9	infected_1
Q9H2J7	Sodium-dependent neutral amino acid transporter B(0)AT2 OS=Homo sapiens GN=SLC6A15 PE=1 SV=1	40.35	infected_1
Q5SXM1	Zinc finger protein 678 OS=Homo sapiens GN=ZNF678 PE=2 SV=1	34.63	infected_1
Q17RP2	Tigger transposable element-derived protein 6 OS=Homo sapiens GN=TIGD6 PE=2 SV=2	47.83	infected_1
Q9NQU5	Serine/threonine-protein kinase PAK 6 OS=Homo sapiens GN=PAK6 PE=1 SV=1	27.17	infected_1
Q16236	Nuclear factor erythroid 2-related factor 2 OS=Homo sapiens GN=NFE2L2 PE=1 SV=3	27.19	infected_1
Q6UXH9	Inactive serine protease PAMR1 OS=Homo sapiens GN=PAMR1 PE=1 SV=1	56.19	infected_1
Q9NR63	Cytochrome P450 26B1 OS=Homo sapiens GN=CYP26B1 PE=1 SV=1	71.39	infected_1
Q6UXH8	Collagen and calcium-binding EGF domain-containing protein 1 OS=Homo sapiens GN=CCBE1 PE=1 SV=1	44.13	infected_1
Q92764	Keratin, type I cuticular Ha5 OS=Homo sapiens GN=KRT35 PE=2 SV=5	9.98	infected_1
Q6H8Q1	Actin-binding LIM protein 2 OS=Homo sapiens GN=ABLIM2 PE=1 SV=2	17.07	infected_1
P46934	E3 ubiquitin-protein ligase NEDD4 OS=Homo sapiens GN=NEDD4 PE=1 SV=4	66.92	infected_1
P21217	Galactoside 3(4)-L-fucosyltransferase OS=Homo sapiens GN=FUT3 PE=2 SV=1	81.58	infected_1
Q9UEG4	Zinc finger protein 629 OS=Homo sapiens GN=ZNF629 PE=1 SV=2	0	infected_1
P13612	Integrin alpha-4 OS=Homo sapiens GN=ITGA4 PE=1 SV=3	42.96	infected_1
Q9NQT6	Fascin-3 OS=Homo sapiens GN=FSCN3 PE=2 SV=1	8.48	infected_1
Q08629	Testican-1 OS=Homo sapiens GN=SPOCK1 PE=1 SV=1	92.33	infected_1
P56704	Protein Wnt-3a OS=Homo sapiens GN=WNT3A PE=1 SV=2	17.75	infected_1
Q16222	UDP-N-acetylhexosamine pyrophosphorylase OS=Homo sapiens GN=UAP1 PE=1 SV=3	81.44	infected_1
Q92753	Nuclear receptor ROR-beta OS=Homo sapiens GN=RORB PE=1 SV=3	13.85	infected_1
Q6UXG2	UPF0577 protein KIAA1324 OS=Homo sapiens GN=KIAA1324 PE=2 SV=2	23.54	infected_1
Q9UEF7	Klotho OS=Homo sapiens GN=KL PE=1 SV=2	24.39	infected_1
P42566	Epidermal growth factor receptor substrate 15 OS=Homo sapiens GN=EPS15 PE=1 SV=2	13.84	infected_1
Q86VD1	MORC family CW-type zinc finger protein 1 OS=Homo sapiens GN=MORC1 PE=2 SV=2	115.6	infected_1
Q9NQS7	Inner centromere protein OS=Homo sapiens GN=INCENP PE=1 SV=3	18.36	infected_1
Q9NQS1	Cell death regulator Aven OS=Homo sapiens GN=AVEN PE=1 SV=1	49.48	infected_1
Q9UEE9	Craniofacial development protein 1 OS=Homo sapiens GN=CFDP1 PE=1 SV=1	82.63	infected_1
Q06430	N-acetyllactosaminide beta-1,6-N-acetylglucosaminyl-transferase, isoform B OS=Homo sapiens GN=GCNT2 PE=2 SV=1	24.61	infected_1
P52333	Tyrosine-protein kinase JAK3 OS=Homo sapiens GN=JAK3 PE=1 SV=2	81.23	infected_1
Q9NQR7	Coiled-coil domain-containing protein 177 OS=Homo sapiens GN=CCDC177 PE=2 SV=3	21.97	infected_1
Q9H2G4	Testis-specific Y-encoded-like protein 2 OS=Homo sapiens GN=TSPYL2 PE=1 SV=1	22.02	infected_1
Q92738	USP6 N-terminal-like protein OS=Homo sapiens GN=USP6NL PE=1 SV=3	74.61	infected_1
Q9NR30	Nucleolar RNA helicase 2 OS=Homo sapiens GN=DDX21 PE=1 SV=5	103.14	infected_1
Q14028	Cyclic nucleotide-gated cation channel beta-1 OS=Homo sapiens GN=CNGB1 PE=1 SV=2	54.65	infected_1
Q0VF49	Uncharacterized protein KIAA2012 OS=Homo sapiens GN=KIAA2012 PE=2 SV=2	38.18	infected_1
Q6ZW31	Rho GTPase-activating protein SYDE1 OS=Homo sapiens GN=SYDE1 PE=1 SV=1	88.13	infected_1
Q9BRX2	Protein pelota homolog OS=Homo sapiens GN=PELO PE=1 SV=2	34.89	infected_1
P28290	Sperm-specific antigen 2 OS=Homo sapiens GN=SSFA2 PE=1 SV=3	38.31	infected_1
Q9H2F5	Enhancer of polycomb homolog 1 OS=Homo sapiens GN=EPC1 PE=1 SV=1	80.59	infected_1
P09104	Gamma-enolase OS=Homo sapiens GN=ENO2 PE=1 SV=3	24.81	infected_1
P28288	ATP-binding cassette sub-family D member 3 OS=Homo sapiens GN=ABCD3 PE=1 SV=1	142.39	infected_1
Q9NR16	Scavenger receptor cysteine-rich type 1 protein M160 OS=Homo sapiens GN=CD163L1 PE=1 SV=2	79.48	infected_1
Q8NFY4	Semaphorin-6D OS=Homo sapiens GN=SEMA6D PE=2 SV=1	33.45	infected_1
Q6UXC1	Apical endosomal glycoprotein OS=Homo sapiens GN=MAMDC4 PE=2 SV=2	44.19	infected_1
B7Z6K7	Putative uncharacterized zinc finger protein 814 OS=Homo sapiens GN=ZNF814 PE=1 SV=2	73.96	infected_1
P20794	Serine/threonine-protein kinase MAK OS=Homo sapiens GN=MAK PE=1 SV=2	108.27	infected_1
Q49AG3	Zinc finger BED domain-containing protein 5 OS=Homo sapiens GN=ZBED5 PE=2 SV=2	23.76	infected_1
Q9H2C2	Protein ARV1 OS=Homo sapiens GN=ARV1 PE=2 SV=1	54.11	infected_1
Q5VU65	Nuclear pore membrane glycoprotein 210-like OS=Homo sapiens GN=NUP210L PE=2 SV=1	30.34	infected_1
Q8WV99	AN1-type zinc finger protein 2B OS=Homo sapiens GN=ZFAND2B PE=1 SV=1	266.89	infected_1
Q99797	Mitochondrial intermediate peptidase OS=Homo sapiens GN=MIPEP PE=1 SV=2	60.01	infected_1
P34903	Gamma-aminobutyric acid receptor subunit alpha-3 OS=Homo sapiens GN=GABRA3 PE=2 SV=1	20.93	infected_1
Q8IUB2	WAP four-disulfide core domain protein 3 OS=Homo sapiens GN=WFDC3 PE=2 SV=1	45.59	infected_1
Q8WV93	Lactation elevated protein 1 OS=Homo sapiens GN=LACE1 PE=1 SV=2	7.41	infected_1
Q32P51	Heterogeneous nuclear ribonucleoprotein A1-like 2 OS=Homo sapiens GN=HNRNPA1L2 PE=2 SV=2	43.21	infected_1
Q17RG1	BTB/POZ domain-containing protein KCTD19 OS=Homo sapiens GN=KCTD19 PE=2 SV=1	60.75	infected_1
P16284	Platelet endothelial cell adhesion molecule OS=Homo sapiens GN=PECAM1 PE=1 SV=1	33.17	infected_1
Q15776	Zinc finger protein with KRAB and SCAN domains 8 OS=Homo sapiens GN=ZKSCAN8 PE=1 SV=2	50.99	infected_1
Q6ZVL6	UPF0606 protein KIAA1549L OS=Homo sapiens GN=KIAA1549L PE=2 SV=2	73.25	infected_1
P08686	Steroid 21-hydroxylase OS=Homo sapiens GN=CYP21A2 PE=1 SV=1	162.79	infected_1
Q68BL7	Olfactomedin-like protein 2A OS=Homo sapiens GN=OLFML2A PE=2 SV=1	14.14	infected_1
Q13595	Transformer-2 protein homolog alpha OS=Homo sapiens GN=TRA2A PE=1 SV=1	451.54	infected_1
Q9BRR8	G patch domain-containing protein 1 OS=Homo sapiens GN=GPATCH1 PE=1 SV=1	58.35	infected_1
P30532	Neuronal acetylcholine receptor subunit alpha-5 OS=Homo sapiens GN=CHRNA5 PE=1 SV=2	15.84	infected_1
Q9BRR6	ADP-dependent glucokinase OS=Homo sapiens GN=ADPGK PE=1 SV=1	38.79	infected_1
P30530	Tyrosine-protein kinase receptor UFO OS=Homo sapiens GN=AXL PE=1 SV=3	53.16	infected_1
A6NFX1	Major facilitator superfamily domain-containing protein 2B OS=Homo sapiens GN=MFSD2B PE=2 SV=3	32.64	infected_1
Q659C4	La-related protein 1B OS=Homo sapiens GN=LARP1B PE=1 SV=2	93.29	infected_1
Q8NFT6	Protein DBF4 homolog B OS=Homo sapiens GN=DBF4B PE=1 SV=1	34	infected_1
Q70EK8	Inactive ubiquitin carboxyl-terminal hydrolase 53 OS=Homo sapiens GN=USP53 PE=2 SV=2	53.48	infected_1
Q96T92	Insulinoma-associated protein 2 OS=Homo sapiens GN=INSM2 PE=1 SV=3	28.02	infected_1
Q7LFX5	Carbohydrate sulfotransferase 15 OS=Homo sapiens GN=CHST15 PE=1 SV=1	15.37	infected_1
Q9BRQ6	MICOS complex subunit MIC25 OS=Homo sapiens GN=CHCHD6 PE=1 SV=1	249.63	infected_1
Q9BRQ4	Uncharacterized protein C11orf70 OS=Homo sapiens GN=C11orf70 PE=2 SV=3	90.44	infected_1
P28223	5-hydroxytryptamine receptor 2A OS=Homo sapiens GN=HTR2A PE=1 SV=2	43.08	infected_1
Q86UZ6	Zinc finger and BTB domain-containing protein 46 OS=Homo sapiens GN=ZBTB46 PE=1 SV=2	89.78	infected_1
Q8N9Z0	Zinc finger protein 610 OS=Homo sapiens GN=ZNF610 PE=2 SV=2	5.09	infected_1
P49589	Cysteine--tRNA ligase, cytoplasmic OS=Homo sapiens GN=CARS PE=1 SV=3	29.94	infected_1
Q3MIT2	Putative tRNA pseudouridine synthase Pus10 OS=Homo sapiens GN=PUS10 PE=1 SV=1	15.87	infected_1
Q8WUU5	GATA zinc finger domain-containing protein 1 OS=Homo sapiens GN=GATAD1 PE=1 SV=1	29.65	infected_1
Q96T88	E3 ubiquitin-protein ligase UHRF1 OS=Homo sapiens GN=UHRF1 PE=1 SV=1	120.47	infected_1
P98095	Fibulin-2 OS=Homo sapiens GN=FBLN2 PE=1 SV=2	64.31	infected_1
Q13573	SNW domain-containing protein 1 OS=Homo sapiens GN=SNW1 PE=1 SV=1	23.86	infected_1
Q13571	Lysosomal-associated transmembrane protein 5 OS=Homo sapiens GN=LAPTM5 PE=1 SV=1	19.5	infected_1
Q32P28	Prolyl 3-hydroxylase 1 OS=Homo sapiens GN=P3H1 PE=1 SV=2	163.46	infected_1
Q3MIS6	Zinc finger protein 528 OS=Homo sapiens GN=ZNF528 PE=2 SV=1	175.89	infected_1
Q9NQI0	Probable ATP-dependent RNA helicase DDX4 OS=Homo sapiens GN=DDX4 PE=1 SV=2	73.93	infected_1
Q15746	Myosin light chain kinase, smooth muscle OS=Homo sapiens GN=MYLK PE=1 SV=4	57.43	infected_1
Q96T76	MMS19 nucleotide excision repair protein homolog OS=Homo sapiens GN=MMS19 PE=1 SV=2	119.21	infected_1
Q15743	Ovarian cancer G-protein coupled receptor 1 OS=Homo sapiens GN=GPR68 PE=1 SV=1	64.56	infected_1
Q86UX6	Serine/threonine-protein kinase 32C OS=Homo sapiens GN=STK32C PE=1 SV=1	185.12	infected_1
Q8NFQ5	BPI fold-containing family B member 6 OS=Homo sapiens GN=BPIFB6 PE=1 SV=1	82.27	infected_1
Q5JV73	FERM and PDZ domain-containing protein 3 OS=Homo sapiens GN=FRMPD3 PE=2 SV=2	25.25	infected_1
Q6UWZ7	BRCA1-A complex subunit Abraxas OS=Homo sapiens GN=FAM175A PE=1 SV=2	19.86	infected_1
Q8WV44	E3 ubiquitin-protein ligase TRIM41 OS=Homo sapiens GN=TRIM41 PE=1 SV=3	115.13	infected_1
P98077	SHC-transforming protein 2 OS=Homo sapiens GN=SHC2 PE=1 SV=4	31.39	infected_1
Q96T68	Histone-lysine N-methyltransferase SETDB2 OS=Homo sapiens GN=SETDB2 PE=1 SV=2	31.57	infected_1
Q99741	Cell division control protein 6 homolog OS=Homo sapiens GN=CDC6 PE=1 SV=1	170.62	infected_1
P08648	Integrin alpha-5 OS=Homo sapiens GN=ITGA5 PE=1 SV=2	21.71	infected_1
Q6ZVH7	Espin-like protein OS=Homo sapiens GN=ESPNL PE=2 SV=3	50.49	infected_1
P0CG41	cTAGE family member 8 OS=Homo sapiens GN=CTAGE8 PE=3 SV=1	85.83	infected_1
P0CG40	Transcription factor Sp9 OS=Homo sapiens GN=SP9 PE=3 SV=1	210.48	infected_1
Q96T60	Bifunctional polynucleotide phosphatase/kinase OS=Homo sapiens GN=PNKP PE=1 SV=1	70.79	infected_1
Q86UW7	Calcium-dependent secretion activator 2 OS=Homo sapiens GN=CADPS2 PE=1 SV=2	40.67	infected_1
P51858	Hepatoma-derived growth factor OS=Homo sapiens GN=HDGF PE=1 SV=1	172.79	infected_1
Q17RB8	LON peptidase N-terminal domain and RING finger protein 1 OS=Homo sapiens GN=LONRF1 PE=1 SV=2	17.23	infected_1
Q9UDY2	Tight junction protein ZO-2 OS=Homo sapiens GN=TJP2 PE=1 SV=2	164.39	infected_1
P26012	Integrin beta-8 OS=Homo sapiens GN=ITGB8 PE=2 SV=1	23.47	infected_1
Q8NFP4	MAM domain-containing glycosylphosphatidylinositol anchor protein 1 OS=Homo sapiens GN=MDGA1 PE=1 SV=1	37.61	infected_1
Q9UQR1	Zinc finger protein 148 OS=Homo sapiens GN=ZNF148 PE=1 SV=2	33.47	infected_1
[truncated: 2,650 more rows]

## Sheet: Infected2vscontrol2
Accession	Description	Score	infected_2:control_2_Ratio
O75147	Obscurin-like protein 1 OS=Homo sapiens GN=OBSL1 PE=1 SV=4	9.92	0.115325
O60449	Lymphocyte antigen 75 OS=Homo sapiens GN=LY75 PE=1 SV=3	30.54	0.138069
P0DJD1	RANBP2-like and GRIP domain-containing protein 2 OS=Homo sapiens GN=RGPD2 PE=2 SV=1	82.29	0.329559
P0DJD0	RANBP2-like and GRIP domain-containing protein 1 OS=Homo sapiens GN=RGPD1 PE=2 SV=1	84.62	0.346456
Q5JRC9	Protein FAM47A OS=Homo sapiens GN=FAM47A PE=2 SV=3	33.45	0.367879
Q86YE8	Zinc finger protein 573 OS=Homo sapiens GN=ZNF573 PE=2 SV=4	54.75	0.402524
A6QL64	Ankyrin repeat domain-containing protein 36A OS=Homo sapiens GN=ANKRD36 PE=2 SV=3	93.52	0.431711
Q14324	Myosin-binding protein C, fast-type OS=Homo sapiens GN=MYBPC2 PE=1 SV=2	90.33	0.436049
Q6UN15	Pre-mRNA 3'-end-processing factor FIP1 OS=Homo sapiens GN=FIP1L1 PE=1 SV=1	147.22	0.458406
P27816	Microtubule-associated protein 4 OS=Homo sapiens GN=MAP4 PE=1 SV=3	241.47	0.481909
O75095	Multiple epidermal growth factor-like domains protein 6 OS=Homo sapiens GN=MEGF6 PE=1 SV=4	18.65	0.532592
Q5T200	Zinc finger CCCH domain-containing protein 13 OS=Homo sapiens GN=ZC3H13 PE=1 SV=1	135.96	0.582748
Q8N960	Centrosomal protein of 120 kDa OS=Homo sapiens GN=CEP120 PE=1 SV=2	19.22	0.625002
Q13029	PR domain zinc finger protein 2 OS=Homo sapiens GN=PRDM2 PE=1 SV=3	45.67	0.631284
Q14676	Mediator of DNA damage checkpoint protein 1 OS=Homo sapiens GN=MDC1 PE=1 SV=3	49.34	0.650509
P00390	Glutathione reductase, mitochondrial OS=Homo sapiens GN=GSR PE=1 SV=2	18.06	0.67032
O60353	Frizzled-6 OS=Homo sapiens GN=FZD6 PE=1 SV=2	53.59	0.67032
Q8NDG6	Putative ATP-dependent RNA helicase TDRD9 OS=Homo sapiens GN=TDRD9 PE=2 SV=3	124.36	0.677057
A0AVI2	Fer-1-like protein 5 OS=Homo sapiens GN=FER1L5 PE=2 SV=2	113.35	0.677057
O60333	Kinesin-like protein KIF1B OS=Homo sapiens GN=KIF1B PE=1 SV=5	101.63	0.718924
P23468	Receptor-type tyrosine-protein phosphatase delta OS=Homo sapiens GN=PTPRD PE=1 SV=2	22.89	0.718924
Q8N7Z5	Putative ankyrin repeat domain-containing protein 31 OS=Homo sapiens GN=ANKRD31 PE=5 SV=2	25.21	0.726149
Q8N2N9	Ankyrin repeat domain-containing protein 36B OS=Homo sapiens GN=ANKRD36B PE=1 SV=4	17.96	0.771052
Q7L590	Protein MCM10 homolog OS=Homo sapiens GN=MCM10 PE=1 SV=2	46	0.786628
Q6ZMW3	Echinoderm microtubule-associated protein-like 6 OS=Homo sapiens GN=EML6 PE=2 SV=2	77.92	0.802519
P13533	Myosin-6 OS=Homo sapiens GN=MYH6 PE=1 SV=5	26.88	0.810584
Q9P2E9	Ribosome-binding protein 1 OS=Homo sapiens GN=RRBP1 PE=1 SV=4	44.34	0.810584
Q9HCK4	Roundabout homolog 2 OS=Homo sapiens GN=ROBO2 PE=1 SV=2	37.53	0.810584
Q8IYE1	Coiled-coil domain-containing protein 13 OS=Homo sapiens GN=CCDC13 PE=1 SV=2	23.78	0.818731
Q9Y4I1	Unconventional myosin-Va OS=Homo sapiens GN=MYO5A PE=1 SV=2	70.34	0.83527
Q92954	Proteoglycan 4 OS=Homo sapiens GN=PRG4 PE=1 SV=2	70.36	0.852144
P14410	Sucrase-isomaltase, intestinal OS=Homo sapiens GN=SI PE=1 SV=6	25.23	0.860708
Q5T5U3	Rho GTPase-activating protein 21 OS=Homo sapiens GN=ARHGAP21 PE=1 SV=1	16.78	0.869358
Q86YA3	Protein ZGRF1 OS=Homo sapiens GN=ZGRF1 PE=2 SV=3	20.87	0.878095
P48634	Protein PRRC2A OS=Homo sapiens GN=PRRC2A PE=1 SV=3	113.91	0.88692
Q9Y2K3	Myosin-15 OS=Homo sapiens GN=MYH15 PE=1 SV=5	68	0.904837
O75140	DEP domain-containing protein 5 OS=Homo sapiens GN=DEPDC5 PE=1 SV=2	47.75	0.913931
P29375	Lysine-specific demethylase 5A OS=Homo sapiens GN=KDM5A PE=1 SV=3	36.67	0.932394
Q9P0W8	Spermatogenesis-associated protein 7 OS=Homo sapiens GN=SPATA7 PE=1 SV=3	33.02	0.932394
Q6ZU80	Centrosomal protein of 128 kDa OS=Homo sapiens GN=CEP128 PE=1 SV=2	48.45	0.932394
Q8IXT5	RNA-binding protein 12B OS=Homo sapiens GN=RBM12B PE=1 SV=2	23.01	0.980199
P49815	Tuberin OS=Homo sapiens GN=TSC2 PE=1 SV=2	11.42	1
Q5VXU9	Uncharacterized protein C9orf84 OS=Homo sapiens GN=C9orf84 PE=2 SV=1	12.71	1.01005
Q96Q89	Kinesin-like protein KIF20B OS=Homo sapiens GN=KIF20B PE=1 SV=3	106.53	1.0202
Q5JPF3	Ankyrin repeat domain-containing protein 36C OS=Homo sapiens GN=ANKRD36C PE=2 SV=3	29.15	1.03045
P56715	Oxygen-regulated protein 1 OS=Homo sapiens GN=RP1 PE=1 SV=1	18.02	1.04081
Q96L96	Alpha-protein kinase 3 OS=Homo sapiens GN=ALPK3 PE=2 SV=2	21.12	1.04081
Q14152	Eukaryotic translation initiation factor 3 subunit A OS=Homo sapiens GN=EIF3A PE=1 SV=1	135.29	1.06184
Q6YHU6	Thyroid adenoma-associated protein OS=Homo sapiens GN=THADA PE=1 SV=1	15.72	1.07251
Q5JSZ5	Protein PRRC2B OS=Homo sapiens GN=PRRC2B PE=1 SV=2	90.15	1.11628
P09884	DNA polymerase alpha catalytic subunit OS=Homo sapiens GN=POLA1 PE=1 SV=2	42.9	1.1275
P35579	Myosin-9 OS=Homo sapiens GN=MYH9 PE=1 SV=4	215.97	1.19722
Q8NFU7	Methylcytosine dioxygenase TET1 OS=Homo sapiens GN=TET1 PE=1 SV=2	51.29	1.20925
Q7Z6B7	SLIT-ROBO Rho GTPase-activating protein 1 OS=Homo sapiens GN=SRGAP1 PE=1 SV=1	19.75	1.2214
Q14432	cGMP-inhibited 3',5'-cyclic phosphodiesterase A OS=Homo sapiens GN=PDE3A PE=1 SV=3	69.39	1.24608
Q7Z406	Myosin-14 OS=Homo sapiens GN=MYH14 PE=1 SV=2	120.04	1.28403
Q9UKX2	Myosin-2 OS=Homo sapiens GN=MYH2 PE=1 SV=1	75.9	1.33643
P12882	Myosin-1 OS=Homo sapiens GN=MYH1 PE=1 SV=3	68.38	1.41907
Q86VM9	Zinc finger CCCH domain-containing protein 18 OS=Homo sapiens GN=ZC3H18 PE=1 SV=2	70.93	1.41907
Q8TBY9	WD repeat-containing protein 66 OS=Homo sapiens GN=WDR66 PE=2 SV=2	18.74	1.44773
Q9H3S7	Tyrosine-protein phosphatase non-receptor type 23 OS=Homo sapiens GN=PTPN23 PE=1 SV=1	52.87	1.46228
O60303	Uncharacterized protein KIAA0556 OS=Homo sapiens GN=KIAA0556 PE=1 SV=4	31.2	1.59999
P23458	Tyrosine-protein kinase JAK1 OS=Homo sapiens GN=JAK1 PE=1 SV=2	38.01	1.63232
Q8TDI0	Chromodomain-helicase-DNA-binding protein 5 OS=Homo sapiens GN=CHD5 PE=1 SV=1	28.9	1.64872
Q12860	Contactin-1 OS=Homo sapiens GN=CNTN1 PE=1 SV=1	37.28	1.73325
Q9NZM1	Myoferlin OS=Homo sapiens GN=MYOF PE=1 SV=1	59.68	1.80399
P54259	Atrophin-1 OS=Homo sapiens GN=ATN1 PE=1 SV=3	44.72	1.82212
P49750	YLP motif-containing protein 1 OS=Homo sapiens GN=YLPM1 PE=1 SV=3	56.92	2.22554
Q9Y623	Myosin-4 OS=Homo sapiens GN=MYH4 PE=1 SV=2	66.94	2.2705
Q8N841	Tubulin polyglutamylase TTLL6 OS=Homo sapiens GN=TTLL6 PE=1 SV=2	40.91	2.36316
Q92576	PHD finger protein 3 OS=Homo sapiens GN=PHF3 PE=1 SV=3	62.88	2.63794
Q92824	Proprotein convertase subtilisin/kexin type 5 OS=Homo sapiens GN=PCSK5 PE=1 SV=4	27.07	2.63794
Q07157	Tight junction protein ZO-1 OS=Homo sapiens GN=TJP1 PE=1 SV=3	77.19	2.85765
Q6ZSZ5	Rho guanine nucleotide exchange factor 18 OS=Homo sapiens GN=ARHGEF18 PE=1 SV=3	45.32	2.97427
P42356	Phosphatidylinositol 4-kinase alpha OS=Homo sapiens GN=PI4KA PE=1 SV=3	133.04	3.09566
P13569	Cystic fibrosis transmembrane conductance regulator OS=Homo sapiens GN=CFTR PE=1 SV=3	24.69	3.12677
Q15075	Early endosome antigen 1 OS=Homo sapiens GN=EEA1 PE=1 SV=2	80.66	3.25437
Q8WWL7	G2/mitotic-specific cyclin-B3 OS=Homo sapiens GN=CCNB3 PE=1 SV=2	44.88	3.25437
Q92817	Envoplakin OS=Homo sapiens GN=EVPL PE=1 SV=3	79.46	3.42123
Q9BTC0	Death-inducer obliterator 1 OS=Homo sapiens GN=DIDO1 PE=1 SV=5	61.26	3.42123
Q9UKX3	Myosin-13 OS=Homo sapiens GN=MYH13 PE=2 SV=2	27.59	3.49034
P29728	2'-5'-oligoadenylate synthase 2 OS=Homo sapiens GN=OAS2 PE=1 SV=3	28.82	3.59664
Q5VTR2	E3 ubiquitin-protein ligase BRE1A OS=Homo sapiens GN=RNF20 PE=1 SV=2	86.74	3.74342
Q8IZD9	Dedicator of cytokinesis protein 3 OS=Homo sapiens GN=DOCK3 PE=1 SV=1	113.22	3.81904
Q9Y2I7	1-phosphatidylinositol 3-phosphate 5-kinase OS=Homo sapiens GN=PIKFYVE PE=1 SV=3	40.54	3.85743
P18615	Negative elongation factor E OS=Homo sapiens GN=NELFE PE=1 SV=3	326.54	4.26311
O15061	Synemin OS=Homo sapiens GN=SYNM PE=1 SV=2	89.79	4.4371
P49756	RNA-binding protein 25 OS=Homo sapiens GN=RBM25 PE=1 SV=3	63.53	4.48169
Q15735	Phosphatidylinositol 4,5-bisphosphate 5-phosphatase A OS=Homo sapiens GN=INPP5J PE=1 SV=3	25.06	4.71147
Q9UKL3	CASP8-associated protein 2 OS=Homo sapiens GN=CASP8AP2 PE=1 SV=1	45.02	5.10387
O14715	RANBP2-like and GRIP domain-containing protein 8 OS=Homo sapiens GN=RGPD8 PE=1 SV=2	71.65	6.5535
Q7Z3J3	RanBP2-like and GRIP domain-containing protein 4 OS=Homo sapiens GN=RGPD4 PE=2 SV=3	68.31	6.75309
Q9ULV0	Unconventional myosin-Vb OS=Homo sapiens GN=MYO5B PE=1 SV=3	47.25	6.82096
Q99666	RANBP2-like and GRIP domain-containing protein 5/6 OS=Homo sapiens GN=RGPD5 PE=1 SV=3	71.65	7.46332
A6NKT7	RanBP2-like and GRIP domain-containing protein 3 OS=Homo sapiens GN=RGPD3 PE=3 SV=2	67.67	7.69061
O95996	Adenomatous polyposis coli protein 2 OS=Homo sapiens GN=APC2 PE=1 SV=1	82.03	8.41487
P11137	Microtubule-associated protein 2 OS=Homo sapiens GN=MAP2 PE=1 SV=4	106.01	8.49944
Q5TCX8	Mitogen-activated protein kinase kinase kinase MLK4 OS=Homo sapiens GN=MLK4 PE=1 SV=1	77.03	8.93521
Q9BX84	Transient receptor potential cation channel subfamily M member 6 OS=Homo sapiens GN=TRPM6 PE=1 SV=2	55.32	10.1757
P13535	Myosin-8 OS=Homo sapiens GN=MYH8 PE=1 SV=3	35.77	10.9135
O95405	Zinc finger FYVE domain-containing protein 9 OS=Homo sapiens GN=ZFYVE9 PE=1 SV=2	7.41	control_2
P49221	Protein-glutamine gamma-glutamyltransferase 4 OS=Homo sapiens GN=TGM4 PE=1 SV=2	61.91	control_2
Q06730	Zinc finger protein 33A OS=Homo sapiens GN=ZNF33A PE=1 SV=3	55.02	control_2
Q99549	M-phase phosphoprotein 8 OS=Homo sapiens GN=MPHOSPH8 PE=1 SV=2	28.73	control_2
Q8N7Z2	Golgin subfamily A member 6-like protein 1 OS=Homo sapiens GN=GOLGA6L1 PE=2 SV=2	52.23	control_2
P23443	Ribosomal protein S6 kinase beta-1 OS=Homo sapiens GN=RPS6KB1 PE=1 SV=2	23.65	control_2
P06213	Insulin receptor OS=Homo sapiens GN=INSR PE=1 SV=4	46.68	control_2
O15037	Protein KHNYN OS=Homo sapiens GN=KHNYN PE=1 SV=3	77.94	control_2
Q8IVF6	Ankyrin repeat domain-containing protein 18A OS=Homo sapiens GN=ANKRD18A PE=2 SV=3	79.14	control_2
O60645	Exocyst complex component 3 OS=Homo sapiens GN=EXOC3 PE=1 SV=2	248.61	control_2
A1L4H1	Soluble scavenger receptor cysteine-rich domain-containing protein SSC5D OS=Homo sapiens GN=SSC5D PE=1 SV=3	21.11	control_2
O15031	Plexin-B2 OS=Homo sapiens GN=PLXNB2 PE=1 SV=3	22.73	control_2
P13378	Homeobox protein Hox-D8 OS=Homo sapiens GN=HOXD8 PE=2 SV=2	54.42	control_2
Q15700	Disks large homolog 2 OS=Homo sapiens GN=DLG2 PE=1 SV=3	29.31	control_2
P55291	Cadherin-15 OS=Homo sapiens GN=CDH15 PE=1 SV=1	49.61	control_2
Q5TH69	Brefeldin A-inhibited guanine nucleotide-exchange protein 3 OS=Homo sapiens GN=ARFGEF3 PE=1 SV=3	43.5	control_2
Q96HC4	PDZ and LIM domain protein 5 OS=Homo sapiens GN=PDLIM5 PE=1 SV=5	62.13	control_2
P55289	Cadherin-12 OS=Homo sapiens GN=CDH12 PE=2 SV=2	40.33	control_2
Q711Q0	Uncharacterized protein C10orf71 OS=Homo sapiens GN=C10orf71 PE=2 SV=2	12.58	control_2
Q9H6D8	Fibronectin type III domain-containing protein 4 OS=Homo sapiens GN=FNDC4 PE=2 SV=1	5.89	control_2
Q14966	Zinc finger protein 638 OS=Homo sapiens GN=ZNF638 PE=1 SV=2	36.31	control_2
Q96QT4	Transient receptor potential cation channel subfamily M member 7 OS=Homo sapiens GN=TRPM7 PE=1 SV=1	49.48	control_2
Q9NY47	Voltage-dependent calcium channel subunit alpha-2/delta-2 OS=Homo sapiens GN=CACNA2D2 PE=1 SV=2	47.17	control_2
Q9ULD4	Bromodomain and PHD finger-containing protein 3 OS=Homo sapiens GN=BRPF3 PE=1 SV=2	94.47	control_2
Q99523	Sortilin OS=Homo sapiens GN=SORT1 PE=1 SV=3	71.87	control_2
O00750	Phosphatidylinositol 4-phosphate 3-kinase C2 domain-containing subunit beta OS=Homo sapiens GN=PIK3C2B PE=1 SV=2	66.95	control_2
Q99880	Histone H2B type 1-L OS=Homo sapiens GN=HIST1H2BL PE=1 SV=3	1417.51	control_2
Q5VYP0	Spermatogenesis-associated protein 31A3 OS=Homo sapiens GN=SPATA31A3 PE=2 SV=1	8.61	control_2
Q96HA7	Tonsoku-like protein OS=Homo sapiens GN=TONSL PE=1 SV=2	27.92	control_2
Q14957	Glutamate receptor ionotropic, NMDA 2C OS=Homo sapiens GN=GRIN2C PE=1 SV=3	12.75	control_2
Q8N883	Zinc finger protein 614 OS=Homo sapiens GN=ZNF614 PE=1 SV=2	26.01	control_2
Q9ULC8	Probable palmitoyltransferase ZDHHC8 OS=Homo sapiens GN=ZDHHC8 PE=1 SV=3	70.29	control_2
Q99879	Histone H2B type 1-M OS=Homo sapiens GN=HIST1H2BM PE=1 SV=3	1436.84	control_2
Q9UBP0	Spastin OS=Homo sapiens GN=SPAST PE=1 SV=1	191.79	control_2
Q99878	Histone H2A type 1-J OS=Homo sapiens GN=HIST1H2AJ PE=1 SV=3	10183.7	control_2
Q99877	Histone H2B type 1-N OS=Homo sapiens GN=HIST1H2BN PE=1 SV=3	1643.5	control_2
Q6ZNG1	Zinc finger protein 600 OS=Homo sapiens GN=ZNF600 PE=1 SV=2	5.56	control_2
P55268	Laminin subunit beta-2 OS=Homo sapiens GN=LAMB2 PE=1 SV=2	26.2	control_2
O60610	Protein diaphanous homolog 1 OS=Homo sapiens GN=DIAPH1 PE=1 SV=2	18.53	control_2
Q9NRE2	Teashirt homolog 2 OS=Homo sapiens GN=TSHZ2 PE=1 SV=3	21.43	control_2
Q9ULB5	Cadherin-7 OS=Homo sapiens GN=CDH7 PE=2 SV=2	49.49	control_2
A6NMT0	Homeobox protein DBX1 OS=Homo sapiens GN=DBX1 PE=3 SV=2	53.7	control_2
P55259	Pancreatic secretory granule membrane major glycoprotein GP2 OS=Homo sapiens GN=GP2 PE=2 SV=3	58.14	control_2
Q12768	WASH complex subunit strumpellin OS=Homo sapiens GN=KIAA0196 PE=1 SV=1	98.25	control_2
P58876	Histone H2B type 1-D OS=Homo sapiens GN=HIST1H2BD PE=1 SV=2	1643.5	control_2
Q68DA7	Formin-1 OS=Homo sapiens GN=FMN1 PE=1 SV=3	31.26	control_2
Q9NRD9	Dual oxidase 1 OS=Homo sapiens GN=DUOX1 PE=1 SV=1	94.63	control_2
Q9NRD8	Dual oxidase 2 OS=Homo sapiens GN=DUOX2 PE=1 SV=2	126.04	control_2
Q9UF56	F-box/LRR-repeat protein 17 OS=Homo sapiens GN=FBXL17 PE=2 SV=3	72.98	control_2
P21580	Tumor necrosis factor alpha-induced protein 3 OS=Homo sapiens GN=TNFAIP3 PE=1 SV=1	6.1	control_2
O75581	Low-density lipoprotein receptor-related protein 6 OS=Homo sapiens GN=LRP6 PE=1 SV=2	7.94	control_2
Q70JA7	Chondroitin sulfate synthase 3 OS=Homo sapiens GN=CHSY3 PE=2 SV=3	19.54	control_2
Q7Z601	Probable G-protein coupled receptor 142 OS=Homo sapiens GN=GPR142 PE=2 SV=1	116.25	control_2
O94985	Calsyntenin-1 OS=Homo sapiens GN=CLSTN1 PE=1 SV=1	7.94	control_2
Q9Y6I3	Epsin-1 OS=Homo sapiens GN=EPN1 PE=1 SV=2	9.69	control_2
O94983	Calmodulin-binding transcription activator 2 OS=Homo sapiens GN=CAMTA2 PE=1 SV=3	11.56	control_2
Q9ULA0	Aspartyl aminopeptidase OS=Homo sapiens GN=DNPEP PE=1 SV=1	122.01	control_2
Q96AQ8	Mitochondrial calcium uniporter regulator 1 OS=Homo sapiens GN=MCUR1 PE=1 SV=1	84.94	control_2
Q9BSM1	Polycomb group RING finger protein 1 OS=Homo sapiens GN=PCGF1 PE=1 SV=2	62.09	control_2
Q12756	Kinesin-like protein KIF1A OS=Homo sapiens GN=KIF1A PE=1 SV=2	78.99	control_2
A8MTY0	Putative zinc finger protein 724 OS=Homo sapiens GN=ZNF724P PE=5 SV=3	25.87	control_2
Q9UBM8	Alpha-1,3-mannosyl-glycoprotein 4-beta-N-acetylglucosaminyltransferase C OS=Homo sapiens GN=MGAT4C PE=2 SV=2	47.2	control_2
Q8NAG6	Ankyrin repeat and LEM domain-containing protein 1 OS=Homo sapiens GN=ANKLE1 PE=2 SV=2	41.53	control_2
Q8NH43	Olfactory receptor 4L1 OS=Homo sapiens GN=OR4L1 PE=3 SV=1	79.57	control_2
Q9BYX7	Putative beta-actin-like protein 3 OS=Homo sapiens GN=POTEKP PE=5 SV=1	122.03	control_2
Q5GAN6	Inactive ribonuclease-like protein 10 OS=Homo sapiens GN=RNASE10 PE=2 SV=1	289.27	control_2
Q5HY98	Zinc finger protein 766 OS=Homo sapiens GN=ZNF766 PE=2 SV=1	44.85	control_2
O60941	Dystrobrevin beta OS=Homo sapiens GN=DTNB PE=1 SV=1	44.56	control_2
O75563	Src kinase-associated phosphoprotein 2 OS=Homo sapiens GN=SKAP2 PE=1 SV=1	62.04	control_2
Q6XUX3	Dual serine/threonine and tyrosine protein kinase OS=Homo sapiens GN=DSTYK PE=1 SV=2	32.18	control_2
Q05932	Folylpolyglutamate synthase, mitochondrial OS=Homo sapiens GN=FPGS PE=1 SV=3	53.21	control_2
P11498	Pyruvate carboxylase, mitochondrial OS=Homo sapiens GN=PC PE=1 SV=2	2.43	control_2
P28290	Sperm-specific antigen 2 OS=Homo sapiens GN=SSFA2 PE=1 SV=3	78	control_2
Q5VYK3	Proteasome-associated protein ECM29 homolog OS=Homo sapiens GN=ECM29 PE=1 SV=2	94.74	control_2
P13667	Protein disulfide-isomerase A4 OS=Homo sapiens GN=PDIA4 PE=1 SV=2	187.1	control_2
H0YM25	Golgin subfamily A member 6-like protein 22 OS=Homo sapiens GN=GOLGA6L22 PE=3 SV=1	37.01	control_2
P30531	Sodium- and chloride-dependent GABA transporter 1 OS=Homo sapiens GN=SLC6A1 PE=1 SV=2	11.03	control_2
Q6STE5	SWI/SNF-related matrix-associated actin-dependent regulator of chromatin subfamily D member 3 OS=Homo sapiens GN=SMARCD3 PE=1 SV=1	18.96	control_2
A6NN14	Zinc finger protein 729 OS=Homo sapiens GN=ZNF729 PE=2 SV=4	24.57	control_2
P59923	Zinc finger protein 445 OS=Homo sapiens GN=ZNF445 PE=1 SV=1	9.23	control_2
Q9BSJ8	Extended synaptotagmin-1 OS=Homo sapiens GN=ESYT1 PE=1 SV=1	27.8	control_2
Q9BW19	Kinesin-like protein KIFC1 OS=Homo sapiens GN=KIFC1 PE=1 SV=2	181.31	control_2
Q5VYJ5	MAM and LDL-receptor class A domain-containing protein 1 OS=Homo sapiens GN=MALRD1 PE=3 SV=3	50.7	control_2
Q9P0X4	Voltage-dependent T-type calcium channel subunit alpha-1I OS=Homo sapiens GN=CACNA1I PE=1 SV=1	109.45	control_2
Q9BZ71	Membrane-associated phosphatidylinositol transfer protein 3 OS=Homo sapiens GN=PITPNM3 PE=1 SV=2	70.54	control_2
Q96E52	Metalloendopeptidase OMA1, mitochondrial OS=Homo sapiens GN=OMA1 PE=1 SV=1	66.31	control_2
Q8N823	Zinc finger protein 611 OS=Homo sapiens GN=ZNF611 PE=2 SV=2	38.93	control_2
Q8N7Q3	Zinc finger protein 676 OS=Homo sapiens GN=ZNF676 PE=2 SV=2	35.73	control_2
Q7Z5K2	Wings apart-like protein homolog OS=Homo sapiens GN=WAPL PE=1 SV=1	30.32	control_2
Q99814	Endothelial PAS domain-containing protein 1 OS=Homo sapiens GN=EPAS1 PE=1 SV=3	44.69	control_2
Q9BW04	Specifically androgen-regulated gene protein OS=Homo sapiens GN=SARG PE=1 SV=2	147.86	control_2
Q9H2U1	ATP-dependent RNA helicase DHX36 OS=Homo sapiens GN=DHX36 PE=1 SV=2	71.49	control_2
P30876	DNA-directed RNA polymerase II subunit RPB2 OS=Homo sapiens GN=POLR2B PE=1 SV=1	92.42	control_2
Q9H9B1	Histone-lysine N-methyltransferase EHMT1 OS=Homo sapiens GN=EHMT1 PE=1 SV=4	34.52	control_2
Q9HBT6	Cadherin-20 OS=Homo sapiens GN=CDH20 PE=2 SV=2	12.25	control_2
P57737	Coronin-7 OS=Homo sapiens GN=CORO7 PE=1 SV=2	95.21	control_2
O14578	Citron Rho-interacting kinase OS=Homo sapiens GN=CIT PE=1 SV=2	34.31	control_2
Q9Y6D9	Mitotic spindle assembly checkpoint protein MAD1 OS=Homo sapiens GN=MAD1L1 PE=1 SV=2	236.75	control_2
Q9Y6D6	Brefeldin A-inhibited guanine nucleotide-exchange protein 1 OS=Homo sapiens GN=ARFGEF1 PE=1 SV=2	23.29	control_2
P56645	Period circadian protein homolog 3 OS=Homo sapiens GN=PER3 PE=1 SV=4	18.22	control_2
Q8IYB9	Zinc finger protein 595 OS=Homo sapiens GN=ZNF595 PE=2 SV=1	268.4	control_2
Q86T65	Disheveled-associated activator of morphogenesis 2 OS=Homo sapiens GN=DAAM2 PE=1 SV=3	40.41	control_2
Q9H9A7	RecQ-mediated genome instability protein 1 OS=Homo sapiens GN=RMI1 PE=1 SV=3	23.96	control_2
Q68CZ2	Tensin-3 OS=Homo sapiens GN=TNS3 PE=1 SV=2	83.47	control_2
Q4G0N8	Sodium/hydrogen exchanger 10 OS=Homo sapiens GN=SLC9C1 PE=2 SV=2	34.08	control_2
Q68CZ1	Protein fantom OS=Homo sapiens GN=RPGRIP1L PE=1 SV=2	40.61	control_2
Q4KMZ1	IQ domain-containing protein C OS=Homo sapiens GN=IQCC PE=2 SV=2	54.66	control_2
P01031	Complement C5 OS=Homo sapiens GN=C5 PE=1 SV=4	30.86	control_2
P20794	Serine/threonine-protein kinase MAK OS=Homo sapiens GN=MAK PE=1 SV=2	38.39	control_2
Q15084	Protein disulfide-isomerase A6 OS=Homo sapiens GN=PDIA6 PE=1 SV=1	154.69	control_2
P22607	Fibroblast growth factor receptor 3 OS=Homo sapiens GN=FGFR3 PE=1 SV=1	37.28	control_2
Q9H2S5	RING finger protein 39 OS=Homo sapiens GN=RNF39 PE=2 SV=2	211.75	control_2
Q8N1B4	Vacuolar protein sorting-associated protein 52 homolog OS=Homo sapiens GN=VPS52 PE=1 SV=1	184.98	control_2
P01023	Alpha-2-macroglobulin OS=Homo sapiens GN=A2M PE=1 SV=3	23.32	control_2
Q8WVM7	Cohesin subunit SA-1 OS=Homo sapiens GN=STAG1 PE=1 SV=3	35.25	control_2
O94910	Adhesion G protein-coupled receptor L1 OS=Homo sapiens GN=ADGRL1 PE=1 SV=1	87.56	control_2
Q63HR2	Tensin-2 OS=Homo sapiens GN=TNS2 PE=1 SV=2	41.77	control_2
Q9BZ29	Dedicator of cytokinesis protein 9 OS=Homo sapiens GN=DOCK9 PE=1 SV=2	47.57	control_2
Q63HQ2	Pikachurin OS=Homo sapiens GN=EGFLAM PE=1 SV=2	73.13	control_2
Q8TD16	Protein bicaudal D homolog 2 OS=Homo sapiens GN=BICD2 PE=1 SV=1	39.96	control_2
Q9NXG6	Transmembrane prolyl 4-hydroxylase OS=Homo sapiens GN=P4HTM PE=1 SV=2	10.05	control_2
P54793	Arylsulfatase F OS=Homo sapiens GN=ARSF PE=1 SV=4	79.73	control_2
O14530	Thioredoxin domain-containing protein 9 OS=Homo sapiens GN=TXNDC9 PE=1 SV=2	70.75	control_2
Q7L7X3	Serine/threonine-protein kinase TAO1 OS=Homo sapiens GN=TAOK1 PE=1 SV=1	80.93	control_2
Q86SQ9	Dehydrodolichyl diphosphate syntase complex subunit DHDDS OS=Homo sapiens GN=DHDDS PE=1 SV=3	26.74	control_2
Q9BVJ6	U3 small nucleolar RNA-associated protein 14 homolog A OS=Homo sapiens GN=UTP14A PE=1 SV=1	220.63	control_2
Q9BYP7	Serine/threonine-protein kinase WNK3 OS=Homo sapiens GN=WNK3 PE=1 SV=3	25.63	control_2
Q86T24	Transcriptional regulator Kaiso OS=Homo sapiens GN=ZBTB33 PE=1 SV=2	42.31	control_2
Q96DN6	Methyl-CpG-binding domain protein 6 OS=Homo sapiens GN=MBD6 PE=2 SV=2	16.67	control_2
Q96H55	Unconventional myosin-XIX OS=Homo sapiens GN=MYO19 PE=1 SV=2	6.68	control_2
Q9UHP3	Ubiquitin carboxyl-terminal hydrolase 25 OS=Homo sapiens GN=USP25 PE=1 SV=4	69.28	control_2
Q15047	Histone-lysine N-methyltransferase SETDB1 OS=Homo sapiens GN=SETDB1 PE=1 SV=1	34.15	control_2
Q02952	A-kinase anchor protein 12 OS=Homo sapiens GN=AKAP12 PE=1 SV=4	65.13	control_2
O14514	Brain-specific angiogenesis inhibitor 1 OS=Homo sapiens GN=BAI1 PE=1 SV=2	80.7	control_2
O14513	Nck-associated protein 5 OS=Homo sapiens GN=NCKAP5 PE=1 SV=2	48.93	control_2
Q4KWH8	1-phosphatidylinositol 4,5-bisphosphate phosphodiesterase eta-1 OS=Homo sapiens GN=PLCH1 PE=1 SV=1	47.55	control_2
Q9NXE4	Sphingomyelin phosphodiesterase 4 OS=Homo sapiens GN=SMPD4 PE=1 SV=2	46.26	control_2
Q9UBC2	Epidermal growth factor receptor substrate 15-like 1 OS=Homo sapiens GN=EPS15L1 PE=1 SV=1	214.63	control_2
Q9BVH7	Alpha-N-acetylgalactosaminide alpha-2,6-sialyltransferase 5 OS=Homo sapiens GN=ST6GALNAC5 PE=2 SV=1	18.41	control_2
P02787	Serotransferrin OS=Homo sapiens GN=TF PE=1 SV=3	34.29	control_2
P10319	HLA class I histocompatibility antigen, B-58 alpha chain OS=Homo sapiens GN=HLA-B PE=1 SV=1	6.06	control_2
Q96GR2	Long-chain-fatty-acid--CoA ligase ACSBG1 OS=Homo sapiens GN=ACSBG1 PE=2 SV=2	73.1	control_2
Q9NQW8	Cyclic nucleotide-gated cation channel beta-3 OS=Homo sapiens GN=CNGB3 PE=1 SV=2	34.8	control_2
Q9NQW6	Actin-binding protein anillin OS=Homo sapiens GN=ANLN PE=1 SV=2	17.13	control_2
P10314	HLA class I histocompatibility antigen, A-32 alpha chain OS=Homo sapiens GN=HLA-A PE=1 SV=2	3.91	control_2
Q9UL54	Serine/threonine-protein kinase TAO2 OS=Homo sapiens GN=TAOK2 PE=1 SV=2	36.03	control_2
P0C0S8	Histone H2A type 1 OS=Homo sapiens GN=HIST1H2AG PE=1 SV=2	10183.7	control_2
P42166	Lamina-associated polypeptide 2, isoform alpha OS=Homo sapiens GN=TMPO PE=1 SV=2	7.29	control_2
Q5TZJ5	Spermatogenesis-associated protein 31A1 OS=Homo sapiens GN=SPATA31A1 PE=3 SV=1	114.64	control_2
P0C0S5	Histone H2A.Z OS=Homo sapiens GN=H2AFZ PE=1 SV=2	1478.94	control_2
Q9HBL0	Tensin-1 OS=Homo sapiens GN=TNS1 PE=1 SV=2	3.16	control_2
Q08211	ATP-dependent RNA helicase A OS=Homo sapiens GN=DHX9 PE=1 SV=4	78.47	control_2
P17039	Zinc finger protein 30 OS=Homo sapiens GN=ZNF30 PE=2 SV=5	76.06	control_2
O75815	Breast cancer anti-estrogen resistance protein 3 OS=Homo sapiens GN=BCAR3 PE=1 SV=1	50.75	control_2
P17038	Zinc finger protein 43 OS=Homo sapiens GN=ZNF43 PE=2 SV=4	302.16	control_2
Q6ZN84	Coiled-coil domain-containing protein 81 OS=Homo sapiens GN=CCDC81 PE=2 SV=2	99.95	control_2
Q5T0W9	Protein FAM83B OS=Homo sapiens GN=FAM83B PE=1 SV=1	49.83	control_2
Q8IV45	UNC5C-like protein OS=Homo sapiens GN=UNC5CL PE=1 SV=2	49.97	control_2
O95069	Potassium channel subfamily K member 2 OS=Homo sapiens GN=KCNK2 PE=1 SV=2	110.33	control_2
Q6ZMV9	Kinesin-like protein KIF6 OS=Homo sapiens GN=KIF6 PE=1 SV=3	145.46	control_2
Q2VIQ3	Chromosome-associated kinesin KIF4B OS=Homo sapiens GN=KIF4B PE=2 SV=2	50.65	control_2
P21802	Fibroblast growth factor receptor 2 OS=Homo sapiens GN=FGFR2 PE=1 SV=1	33.9	control_2
P17025	Zinc finger protein 182 OS=Homo sapiens GN=ZNF182 PE=2 SV=2	29.25	control_2
Q08AN1	Zinc finger protein 616 OS=Homo sapiens GN=ZNF616 PE=2 SV=2	88.06	control_2
Q9H2K8	Serine/threonine-protein kinase TAO3 OS=Homo sapiens GN=TAOK3 PE=1 SV=2	31.03	control_2
Q15003	Condensin complex subunit 2 OS=Homo sapiens GN=NCAPH PE=1 SV=3	111.12	control_2
Q9H2K2	Tankyrase-2 OS=Homo sapiens GN=TNKS2 PE=1 SV=1	43.8	control_2
Q63HK3	Zinc finger protein with KRAB and SCAN domains 2 OS=Homo sapiens GN=ZKSCAN2 PE=1 SV=2	11.09	control_2
P18465	HLA class I histocompatibility antigen, B-57 alpha chain OS=Homo sapiens GN=HLA-B PE=1 SV=1	6.06	control_2
P18462	HLA class I histocompatibility antigen, A-25 alpha chain OS=Homo sapiens GN=HLA-A PE=1 SV=1	141.19	control_2
P51116	Fragile X mental retardation syndrome-related protein 2 OS=Homo sapiens GN=FXR2 PE=1 SV=2	99.15	control_2
Q9UHK6	Alpha-methylacyl-CoA racemase OS=Homo sapiens GN=AMACR PE=1 SV=2	103.13	control_2
Q6ZMU5	Tripartite motif-containing protein 72 OS=Homo sapiens GN=TRIM72 PE=1 SV=2	149.26	control_2
P62987	Ubiquitin-60S ribosomal protein L40 OS=Homo sapiens GN=UBA52 PE=1 SV=2	121.3	control_2
P20702	Integrin alpha-X OS=Homo sapiens GN=ITGAX PE=1 SV=3	44.28	control_2
Q86W26	NACHT, LRR and PYD domains-containing protein 10 OS=Homo sapiens GN=NLRP10 PE=1 SV=1	32.45	control_2
Q6IQ32	ADNP homeobox protein 2 OS=Homo sapiens GN=ADNP2 PE=1 SV=1	31.88	control_2
Q8N0X7	Spartin OS=Homo sapiens GN=SPG20 PE=1 SV=1	71.57	control_2
C9J069	Uncharacterized protein C9orf172 OS=Homo sapiens GN=C9orf172 PE=3 SV=1	160.76	control_2
P62979	Ubiquitin-40S ribosomal protein S27a OS=Homo sapiens GN=RPS27A PE=1 SV=2	121.3	control_2
O60284	Suppression of tumorigenicity 18 protein OS=Homo sapiens GN=ST18 PE=1 SV=1	116.95	control_2
Q86YV9	Hermansky-Pudlak syndrome 6 protein OS=Homo sapiens GN=HPS6 PE=1 SV=1	139.87	control_2
Q9H963	Putative zinc finger protein 702 OS=Homo sapiens GN=ZNF702P PE=5 SV=2	77.48	control_2
P38935	DNA-binding protein SMUBP-2 OS=Homo sapiens GN=IGHMBP2 PE=1 SV=3	8.19	control_2
Q5TCY1	Tau-tubulin kinase 1 OS=Homo sapiens GN=TTBK1 PE=1 SV=2	41.55	control_2
P04908	Histone H2A type 1-B/E OS=Homo sapiens GN=HIST1H2AB PE=1 SV=2	10183.7	control_2
P35670	Copper-transporting ATPase 2 OS=Homo sapiens GN=ATP7B PE=1 SV=4	71.58	control_2
Q53GL7	Poly [ADP-ribose] polymerase 10 OS=Homo sapiens GN=PARP10 PE=1 SV=2	60.21	control_2
Q5M775	Cytospin-B OS=Homo sapiens GN=SPECC1 PE=1 SV=1	34.02	control_2
Q9Y2Q1	Zinc finger protein 257 OS=Homo sapiens GN=ZNF257 PE=2 SV=2	35.2	control_2
Q5VV67	Peroxisome proliferator-activated receptor gamma coactivator-related protein 1 OS=Homo sapiens GN=PPRC1 PE=1 SV=1	48.29	control_2
Q58EX2	Protein sidekick-2 OS=Homo sapiens GN=SDK2 PE=1 SV=3	40.6	control_2
Q14244	Ensconsin OS=Homo sapiens GN=MAP7 PE=1 SV=1	88.78	control_2
Q92794	Histone acetyltransferase KAT6A OS=Homo sapiens GN=KAT6A PE=1 SV=2	9	control_2
Q9UKN8	General transcription factor 3C polypeptide 4 OS=Homo sapiens GN=GTF3C4 PE=1 SV=2	17.65	control_2
Q16777	Histone H2A type 2-C OS=Homo sapiens GN=HIST2H2AC PE=1 SV=4	900.64	control_2
Q9Y2P7	Zinc finger protein 256 OS=Homo sapiens GN=ZNF256 PE=1 SV=2	29.6	control_2
O14802	DNA-directed RNA polymerase III subunit RPC1 OS=Homo sapiens GN=POLR3A PE=1 SV=2	28.33	control_2
Q86YT6	E3 ubiquitin-protein ligase MIB1 OS=Homo sapiens GN=MIB1 PE=1 SV=1	59.5	control_2
Q60I27	ALS2 C-terminal-like protein OS=Homo sapiens GN=ALS2CL PE=1 SV=1	26.82	control_2
Q8N7B9	EF-hand calcium-binding domain-containing protein 3 OS=Homo sapiens GN=EFCAB3 PE=2 SV=1	52.31	control_2
Q14590	Zinc finger protein 235 OS=Homo sapiens GN=ZNF235 PE=2 SV=3	80.89	control_2
Q52LW3	Rho GTPase-activating protein 29 OS=Homo sapiens GN=ARHGAP29 PE=1 SV=2	96.69	control_2
Q14586	Zinc finger protein 267 OS=Homo sapiens GN=ZNF267 PE=2 SV=3	29.6	control_2
P43897	Elongation factor Ts, mitochondrial OS=Homo sapiens GN=TSFM PE=1 SV=2	115.85	control_2
Q13136	Liprin-alpha-1 OS=Homo sapiens GN=PPFIA1 PE=1 SV=1	63.06	control_2
Q5VUR7	Ankyrin repeat domain-containing protein 20A3 OS=Homo sapiens GN=ANKRD20A3 PE=3 SV=1	39.53	control_2
P32019	Type II inositol 1,4,5-trisphosphate 5-phosphatase OS=Homo sapiens GN=INPP5B PE=1 SV=4	59.46	control_2
Q96N67	Dedicator of cytokinesis protein 7 OS=Homo sapiens GN=DOCK7 PE=1 SV=4	8.62	control_2
Q96N66	Lysophospholipid acyltransferase 7 OS=Homo sapiens GN=MBOAT7 PE=1 SV=2	10.54	control_2
Q8HWS3	DNA-binding protein RFX6 OS=Homo sapiens GN=RFX6 PE=1 SV=2	28.45	control_2
Q6ZN08	Putative zinc finger protein 66 OS=Homo sapiens GN=ZNF66 PE=5 SV=3	70.47	control_2
P28827	Receptor-type tyrosine-protein phosphatase mu OS=Homo sapiens GN=PTPRM PE=1 SV=2	80.58	control_2
Q9Y5S2	Serine/threonine-protein kinase MRCK beta OS=Homo sapiens GN=CDC42BPB PE=1 SV=2	67.74	control_2
Q7L7L0	Histone H2A type 3 OS=Homo sapiens GN=HIST3H2A PE=1 SV=3	10183.7	control_2
O43365	Homeobox protein Hox-A3 OS=Homo sapiens GN=HOXA3 PE=1 SV=1	23.56	control_2
Q9BYD6	39S ribosomal protein L1, mitochondrial OS=Homo sapiens GN=MRPL1 PE=1 SV=2	143.2	control_2
Q96N58	Zinc finger protein 578 OS=Homo sapiens GN=ZNF578 PE=2 SV=2	20.09	control_2
P57053	Histone H2B type F-S OS=Homo sapiens GN=H2BFS PE=1 SV=2	1399.14	control_2
Q96MT3	Prickle-like protein 1 OS=Homo sapiens GN=PRICKLE1 PE=1 SV=2	7.69	control_2
Q9Y639	Neuroplastin OS=Homo sapiens GN=NPTN PE=1 SV=2	43.56	control_2
Q2PPJ7	Ral GTPase-activating protein subunit alpha-2 OS=Homo sapiens GN=RALGAPA2 PE=1 SV=2	28.86	control_2
Q5VV16	Forkhead box protein D4-like 5 OS=Homo sapiens GN=FOXD4L5 PE=3 SV=1	12.35	control_2
Q15648	Mediator of RNA polymerase II transcription subunit 1 OS=Homo sapiens GN=MED1 PE=1 SV=4	90.17	control_2
Q5CZ79	Ankyrin repeat domain-containing protein 20B OS=Homo sapiens GN=ANKRD20A8P PE=2 SV=2	29.05	control_2
Q9BYC5	Alpha-(1,6)-fucosyltransferase OS=Homo sapiens GN=FUT8 PE=1 SV=2	25.87	control_2
O95696	Bromodomain-containing protein 1 OS=Homo sapiens GN=BRD1 PE=1 SV=1	38.61	control_2
Q96JM4	Leucine-rich repeat and IQ domain-containing protein 1 OS=Homo sapiens GN=LRRIQ1 PE=2 SV=3	21.58	control_2
Q9NU39	Forkhead box protein D4-like 1 OS=Homo sapiens GN=FOXD4L1 PE=2 SV=1	35.63	control_2
Q96MS0	Roundabout homolog 3 OS=Homo sapiens GN=ROBO3 PE=1 SV=2	45.44	control_2
Q13464	Rho-associated protein kinase 1 OS=Homo sapiens GN=ROCK1 PE=1 SV=1	44.7	control_2
P0CG48	Polyubiquitin-C OS=Homo sapiens GN=UBC PE=1 SV=3	121.3	control_2
P0CG47	Polyubiquitin-B OS=Homo sapiens GN=UBB PE=1 SV=1	121.3	control_2
Q96MR6	Cilia- and flagella-associated protein 57 OS=Homo sapiens GN=CFAP57 PE=2 SV=3	18.04	control_2
P35968	Vascular endothelial growth factor receptor 2 OS=Homo sapiens GN=KDR PE=1 SV=2	51.27	control_2
O75197	Low-density lipoprotein receptor-related protein 5 OS=Homo sapiens GN=LRP5 PE=1 SV=2	2.92	control_2
Q92734	Protein TFG OS=Homo sapiens GN=TFG PE=1 SV=2	77.44	control_2
Q05209	Tyrosine-protein phosphatase non-receptor type 12 OS=Homo sapiens GN=PTPN12 PE=1 SV=3	54.97	control_2
Q8N475	Follistatin-related protein 5 OS=Homo sapiens GN=FSTL5 PE=2 SV=2	82.72	control_2
Q9UHB9	Signal recognition particle subunit SRP68 OS=Homo sapiens GN=SRP68 PE=1 SV=2	68.77	control_2
Q99102	Mucin-4 OS=Homo sapiens GN=MUC4 PE=1 SV=4	33.21	control_2
Q8WYB5	Histone acetyltransferase KAT6B OS=Homo sapiens GN=KAT6B PE=1 SV=3	150.29	control_2
Q8ND61	Uncharacterized protein C3orf20 OS=Homo sapiens GN=C3orf20 PE=2 SV=2	34.31	control_2
O60568	Procollagen-lysine,2-oxoglutarate 5-dioxygenase 3 OS=Homo sapiens GN=PLOD3 PE=1 SV=1	39.69	control_2
Q96N22	Zinc finger protein 681 OS=Homo sapiens GN=ZNF681 PE=2 SV=2	238.26	control_2
Q8N3U4	Cohesin subunit SA-2 OS=Homo sapiens GN=STAG2 PE=1 SV=3	96.46	control_2
Q99457	Nucleosome assembly protein 1-like 3 OS=Homo sapiens GN=NAP1L3 PE=2 SV=2	32.15	control_2
Q9Y2I6	Ninein-like protein OS=Homo sapiens GN=NINL PE=1 SV=2	100.14	control_2
Q9BUY5	Zinc finger protein 426 OS=Homo sapiens GN=ZNF426 PE=1 SV=1	175.25	control_2
Q9BRS2	Serine/threonine-protein kinase RIO1 OS=Homo sapiens GN=RIOK1 PE=1 SV=2	15.13	control_2
Q9GZR7	ATP-dependent RNA helicase DDX24 OS=Homo sapiens GN=DDX24 PE=1 SV=1	77.58	control_2
P30153	Serine/threonine-protein phosphatase 2A 65 kDa regulatory subunit A alpha isoform OS=Homo sapiens GN=PPP2R1A PE=1 SV=4	107.15	control_2
Q8N3T6	Transmembrane protein 132C OS=Homo sapiens GN=TMEM132C PE=2 SV=3	52.73	control_2
Q9UDY6	Tripartite motif-containing protein 10 OS=Homo sapiens GN=TRIM10 PE=1 SV=3	173.39	control_2
Q9NU02	Ankyrin repeat and EF-hand domain-containing protein 1 OS=Homo sapiens GN=ANKEF1 PE=2 SV=2	14.12	control_2
Q9UKF6	Cleavage and polyadenylation specificity factor subunit 3 OS=Homo sapiens GN=CPSF3 PE=1 SV=1	8.25	control_2
Q6P499	NIPA-like protein 3 OS=Homo sapiens GN=NIPAL3 PE=1 SV=1	4.59	control_2
Q9BRR9	Rho GTPase-activating protein 9 OS=Homo sapiens GN=ARHGAP9 PE=1 SV=2	46.03	control_2
P55196	Afadin OS=Homo sapiens GN=MLLT4 PE=1 SV=3	41.57	control_2
Q5BKZ1	DBIRD complex subunit ZNF326 OS=Homo sapiens GN=ZNF326 PE=1 SV=2	35.31	control_2
Q9UKE5	TRAF2 and NCK-interacting protein kinase OS=Homo sapiens GN=TNIK PE=1 SV=1	31.79	control_2
P40200	T-cell surface protein tactile OS=Homo sapiens GN=CD96 PE=1 SV=2	146.47	control_2
O43309	Zinc finger and SCAN domain-containing protein 12 OS=Homo sapiens GN=ZSCAN12 PE=1 SV=1	112.01	control_2
Q66GS9	Centrosomal protein of 135 kDa OS=Homo sapiens GN=CEP135 PE=1 SV=2	54.49	control_2
O43307	Rho guanine nucleotide exchange factor 9 OS=Homo sapiens GN=ARHGEF9 PE=1 SV=3	170.75	control_2
Q8IUE6	Histone H2A type 2-B OS=Homo sapiens GN=HIST2H2AB PE=1 SV=3	10183.7	control_2
Q6SJ93	Protein FAM111B OS=Homo sapiens GN=FAM111B PE=1 SV=1	65.4	control_2
Q8N436	Inactive carboxypeptidase-like protein X2 OS=Homo sapiens GN=CPXM2 PE=2 SV=3	1.74	control_2
Q9NQG6	Mitochondrial dynamics protein MID51 OS=Homo sapiens GN=MIEF1 PE=1 SV=1	70.36	control_2
Q96MN2	NACHT, LRR and PYD domains-containing protein 4 OS=Homo sapiens GN=NLRP4 PE=1 SV=3	74.15	control_2
Q14865	AT-rich interactive domain-containing protein 5B OS=Homo sapiens GN=ARID5B PE=1 SV=3	22.82	control_2
O75152	Zinc finger CCCH domain-containing protein 11A OS=Homo sapiens GN=ZC3H11A PE=1 SV=3	35.67	control_2
O75151	Lysine-specific demethylase PHF2 OS=Homo sapiens GN=PHF2 PE=1 SV=4	64.06	control_2
O75150	E3 ubiquitin-protein ligase BRE1B OS=Homo sapiens GN=RNF40 PE=1 SV=4	89.49	control_2
P20062	Transcobalamin-2 OS=Homo sapiens GN=TCN2 PE=1 SV=3	5.25	control_2
Q96MM6	Heat shock 70 kDa protein 12B OS=Homo sapiens GN=HSPA12B PE=1 SV=2	61.91	control_2
P35916	Vascular endothelial growth factor receptor 3 OS=Homo sapiens GN=FLT4 PE=1 SV=3	53	control_2
Q96Q42	Alsin OS=Homo sapiens GN=ALS2 PE=1 SV=2	15.93	control_2
O60879	Protein diaphanous homolog 2 OS=Homo sapiens GN=DIAPH2 PE=1 SV=1	41.86	control_2
Q9C0I3	Serine-rich coiled-coil domain-containing protein 1 OS=Homo sapiens GN=CCSER1 PE=2 SV=2	35.35	control_2
Q5JSL3	Dedicator of cytokinesis protein 11 OS=Homo sapiens GN=DOCK11 PE=1 SV=2	52.23	control_2
Q7Z4P5	Growth/differentiation factor 7 OS=Homo sapiens GN=GDF7 PE=2 SV=2	137.8	control_2
Q9Y2D9	Zinc finger protein 652 OS=Homo sapiens GN=ZNF652 PE=1 SV=3	8.56	control_2
Q9C0H9	SRC kinase signaling inhibitor 1 OS=Homo sapiens GN=SRCIN1 PE=1 SV=3	78.4	control_2
Q4ZHG4	Fibronectin type III domain-containing protein 1 OS=Homo sapiens GN=FNDC1 PE=2 SV=4	12.12	control_2
P17948	Vascular endothelial growth factor receptor 1 OS=Homo sapiens GN=FLT1 PE=1 SV=2	27.61	control_2
Q5TYW2	Ankyrin repeat domain-containing protein 20A1 OS=Homo sapiens GN=ANKRD20A1 PE=2 SV=1	48.91	control_2
Q66K79	Carboxypeptidase Z OS=Homo sapiens GN=CPZ PE=1 SV=2	23.55	control_2
Q15928	Zinc finger protein 141 OS=Homo sapiens GN=ZNF141 PE=1 SV=1	215.95	control_2
O60502	Protein O-GlcNAcase OS=Homo sapiens GN=MGEA5 PE=1 SV=2	105.14	control_2
O75129	Astrotactin-2 OS=Homo sapiens GN=ASTN2 PE=2 SV=2	73.04	control_2
O75128	Protein cordon-bleu OS=Homo sapiens GN=COBL PE=1 SV=2	34.55	control_2
Q96T83	Sodium/hydrogen exchanger 7 OS=Homo sapiens GN=SLC9A7 PE=1 SV=1	50.4	control_2
Q99758	ATP-binding cassette sub-family A member 3 OS=Homo sapiens GN=ABCA3 PE=1 SV=2	104.36	control_2
Q9UKA4	A-kinase anchor protein 11 OS=Homo sapiens GN=AKAP11 PE=1 SV=1	108.78	control_2
Q5M9N0	Coiled-coil domain-containing protein 158 OS=Homo sapiens GN=CCDC158 PE=1 SV=2	106.07	control_2
Q8NFT2	Metalloreductase STEAP2 OS=Homo sapiens GN=STEAP2 PE=1 SV=3	20.06	control_2
O15245	Solute carrier family 22 member 1 OS=Homo sapiens GN=SLC22A1 PE=1 SV=2	44.12	control_2
P14672	Solute carrier family 2, facilitated glucose transporter member 4 OS=Homo sapiens GN=SLC2A4 PE=1 SV=1	55.08	control_2
P30459	HLA class I histocompatibility antigen, A-74 alpha chain OS=Homo sapiens GN=HLA-A PE=1 SV=1	3.91	control_2
P30456	HLA class I histocompatibility antigen, A-43 alpha chain OS=Homo sapiens GN=HLA-A PE=1 SV=1	142.59	control_2
P30455	HLA class I histocompatibility antigen, A-36 alpha chain OS=Homo sapiens GN=HLA-A PE=1 SV=1	35.95	control_2
P57678	Gem-associated protein 4 OS=Homo sapiens GN=GEMIN4 PE=1 SV=2	73.56	control_2
P30450	HLA class I histocompatibility antigen, A-26 alpha chain OS=Homo sapiens GN=HLA-A PE=1 SV=2	142.59	control_2
O75116	Rho-associated protein kinase 2 OS=Homo sapiens GN=ROCK2 PE=1 SV=4	60.53	control_2
Q7Z4N8	Prolyl 4-hydroxylase subunit alpha-3 OS=Homo sapiens GN=P4HA3 PE=1 SV=1	42.45	control_2
Q9NZU7	Calcium-binding protein 1 OS=Homo sapiens GN=CABP1 PE=1 SV=5	62.02	control_2
Q9Y5H3	Protocadherin gamma-A10 OS=Homo sapiens GN=PCDHGA10 PE=2 SV=1	62.29	control_2
Q9Y5H2	Protocadherin gamma-A11 OS=Homo sapiens GN=PCDHGA11 PE=2 SV=1	83.48	control_2
P11047	Laminin subunit gamma-1 OS=Homo sapiens GN=LAMC1 PE=1 SV=3	67.68	control_2
Q6ZT12	E3 ubiquitin-protein ligase UBR3 OS=Homo sapiens GN=UBR3 PE=2 SV=2	63.45	control_2
Q9Y5H0	Protocadherin gamma-A3 OS=Homo sapiens GN=PCDHGA3 PE=2 SV=2	40.91	control_2
Q9BXX3	Ankyrin repeat domain-containing protein 30A OS=Homo sapiens GN=ANKRD30A PE=2 SV=3	57.87	control_2
P30447	HLA class I histocompatibility antigen, A-23 alpha chain OS=Homo sapiens GN=HLA-A PE=1 SV=1	3.91	control_2
Q8IXF0	Neuronal PAS domain-containing protein 3 OS=Homo sapiens GN=NPAS3 PE=2 SV=1	72.02	control_2
Q9BXX0	EMILIN-2 OS=Homo sapiens GN=EMILIN2 PE=1 SV=3	42.6	control_2
P30443	HLA class I histocompatibility antigen, A-1 alpha chain OS=Homo sapiens GN=HLA-A PE=1 SV=1	38.31	control_2
P49411	Elongation factor Tu, mitochondrial OS=Homo sapiens GN=TUFM PE=1 SV=2	4.65	control_2
Q9Y2A7	Nck-associated protein 1 OS=Homo sapiens GN=NCKAP1 PE=1 SV=1	71.71	control_2
Q9Y5G6	Protocadherin gamma-A7 OS=Homo sapiens GN=PCDHGA7 PE=2 SV=1	31.22	control_2
Q6ZT07	TBC1 domain family member 9 OS=Homo sapiens GN=TBC1D9 PE=2 SV=2	36.93	control_2
P48681	Nestin OS=Homo sapiens GN=NES PE=1 SV=2	77.02	control_2
Q9BXW9	Fanconi anemia group D2 protein OS=Homo sapiens GN=FANCD2 PE=1 SV=2	39.57	control_2
P14651	Homeobox protein Hox-B3 OS=Homo sapiens GN=HOXB3 PE=2 SV=2	20.21	control_2
B2RXH2	Lysine-specific demethylase 4E OS=Homo sapiens GN=KDM4E PE=1 SV=1	179.3	control_2
O14497	AT-rich interactive domain-containing protein 1A OS=Homo sapiens GN=ARID1A PE=1 SV=3	40.07	control_2
Q96ST3	Paired amphipathic helix protein Sin3a OS=Homo sapiens GN=SIN3A PE=1 SV=2	82.93	control_2
Q9Y5F9	Protocadherin gamma-B6 OS=Homo sapiens GN=PCDHGB6 PE=2 SV=1	208.69	control_2
Q4UJ75	Ankyrin repeat domain-containing protein 20A4 OS=Homo sapiens GN=ANKRD20A4 PE=3 SV=1	39.53	control_2
Q9HAU4	E3 ubiquitin-protein ligase SMURF2 OS=Homo sapiens GN=SMURF2 PE=1 SV=1	90.24	control_2
Q9Y5E4	Protocadherin beta-5 OS=Homo sapiens GN=PCDHB5 PE=2 SV=1	26.76	control_2
Q9C0C2	182 kDa tankyrase-1-binding protein OS=Homo sapiens GN=TNKS1BP1 PE=1 SV=4	80.2	control_2
O60814	Histone H2B type 1-K OS=Homo sapiens GN=HIST1H2BK PE=1 SV=3	1399.14	control_2
Q96D46	60S ribosomal export protein NMD3 OS=Homo sapiens GN=NMD3 PE=1 SV=1	18.71	control_2
O75437	Zinc finger protein 254 OS=Homo sapiens GN=ZNF254 PE=2 SV=3	44.05	control_2
Q9C0B9	Zinc finger CCHC domain-containing protein 2 OS=Homo sapiens GN=ZCCHC2 PE=1 SV=6	73.07	control_2
Q9BXT4	Tudor domain-containing protein 1 OS=Homo sapiens GN=TDRD1 PE=1 SV=2	23.64	control_2
P11362	Fibroblast growth factor receptor 1 OS=Homo sapiens GN=FGFR1 PE=1 SV=3	42.96	control_2
A8MZA4	Putative golgin subfamily A member 6-like protein 6 OS=Homo sapiens GN=GOLGA6L6 PE=5 SV=3	15.94	control_2
O43933	Peroxisome biogenesis factor 1 OS=Homo sapiens GN=PEX1 PE=1 SV=1	61.24	control_2
P07814	Bifunctional glutamate/proline--tRNA ligase OS=Homo sapiens GN=EPRS PE=1 SV=5	90.72	control_2
Q9NZP8	Complement C1r subcomponent-like protein OS=Homo sapiens GN=C1RL PE=1 SV=2	62.69	control_2
Q8WXT5	Forkhead box protein D4-like 4 OS=Homo sapiens GN=FOXD4L4 PE=3 SV=2	12.35	control_2
Q9C0A0	Contactin-associated protein-like 4 OS=Homo sapiens GN=CNTNAP4 PE=1 SV=3	57.86	control_2
Q9BXS5	AP-1 complex subunit mu-1 OS=Homo sapiens GN=AP1M1 PE=1 SV=3	1.08	control_2
A2A2Z9	Ankyrin repeat domain-containing protein 18B OS=Homo sapiens GN=ANKRD18B PE=1 SV=1	191.29	control_2
Q12950	Forkhead box protein D4 OS=Homo sapiens GN=FOXD4 PE=2 SV=4	70.59	control_2
Q8N9T8	Protein KRI1 homolog OS=Homo sapiens GN=KRI1 PE=1 SV=3	24.46	control_2
P62244	40S ribosomal protein S15a OS=Homo sapiens GN=RPS15A PE=1 SV=2	20.52	control_2
P39656	Dolichyl-diphosphooligosaccharide--protein glycosyltransferase 48 kDa subunit OS=Homo sapiens GN=DDOST PE=1 SV=4	29.03	control_2
Q01432	AMP deaminase 3 OS=Homo sapiens GN=AMPD3 PE=1 SV=1	7.72	control_2
Q8TEW8	Partitioning defective 3 homolog B OS=Homo sapiens GN=PARD3B PE=1 SV=2	215.94	control_2
Q7Z7M9	Polypeptide N-acetylgalactosaminyltransferase 5 OS=Homo sapiens GN=GALNT5 PE=1 SV=1	34.04	control_2
Q9UJX4	Anaphase-promoting complex subunit 5 OS=Homo sapiens GN=ANAPC5 PE=1 SV=2	28.7	control_2
Q9UQE7	Structural maintenance of chromosomes protein 3 OS=Homo sapiens GN=SMC3 PE=1 SV=2	90.08	control_2
Q8WXR4	Myosin-IIIb OS=Homo sapiens GN=MYO3B PE=2 SV=4	42.08	control_2
P20671	Histone H2A type 1-D OS=Homo sapiens GN=HIST1H2AD PE=1 SV=2	10183.7	control_2
Q86V97	Kelch repeat and BTB domain-containing protein 6 OS=Homo sapiens GN=KBTBD6 PE=1 SV=1	23.65	control_2
O15523	ATP-dependent RNA helicase DDX3Y OS=Homo sapiens GN=DDX3Y PE=1 SV=2	246.12	control_2
Q01780	Exosome component 10 OS=Homo sapiens GN=EXOSC10 PE=1 SV=2	68.27	control_2
Q96SN8	CDK5 regulatory subunit-associated protein 2 OS=Homo sapiens GN=CDK5RAP2 PE=1 SV=5	43.8	control_2
Q8TEV9	Smith-Magenis syndrome chromosomal region candidate gene 8 protein OS=Homo sapiens GN=SMCR8 PE=1 SV=2	31.61	control_2
Q7Z7L1	Schlafen family member 11 OS=Homo sapiens GN=SLFN11 PE=1 SV=2	55.9	control_2
A6NP11	Zinc finger protein 716 OS=Homo sapiens GN=ZNF716 PE=2 SV=4	212.85	control_2
P23921	Ribonucleoside-diphosphate reductase large subunit OS=Homo sapiens GN=RRM1 PE=1 SV=1	80.1	control_2
Q9H211	DNA replication factor Cdt1 OS=Homo sapiens GN=CDT1 PE=1 SV=3	24.22	control_2
Q96CN4	EVI5-like protein OS=Homo sapiens GN=EVI5L PE=1 SV=1	5.09	control_2
Q5JVG8	Zinc finger protein 506 OS=Homo sapiens GN=ZNF506 PE=2 SV=2	3.54	control_2
O14787	Transportin-2 OS=Homo sapiens GN=TNPO2 PE=1 SV=3	10.43	control_2
Q8TEU7	Rap guanine nucleotide exchange factor 6 OS=Homo sapiens GN=RAPGEF6 PE=1 SV=2	39.36	control_2
Q8TF62	Probable phospholipid-transporting ATPase IM OS=Homo sapiens GN=ATP8B4 PE=1 SV=3	13.35	control_2
Q03936	Zinc finger protein 92 OS=Homo sapiens GN=ZNF92 PE=2 SV=2	44.06	control_2
P09067	Homeobox protein Hox-B5 OS=Homo sapiens GN=HOXB5 PE=1 SV=3	9.62	control_2
Q96PF1	Protein-glutamine gamma-glutamyltransferase Z OS=Homo sapiens GN=TGM7 PE=2 SV=1	58.34	control_2
P12757	Ski-like protein OS=Homo sapiens GN=SKIL PE=1 SV=2	10.87	control_2
Q7L0J3	Synaptic vesicle glycoprotein 2A OS=Homo sapiens GN=SV2A PE=1 SV=1	28.25	control_2
Q9UK61	Protein TASOR OS=Homo sapiens GN=FAM208A PE=1 SV=3	53.14	control_2
Q8NFI3	Cytosolic endo-beta-N-acetylglucosaminidase OS=Homo sapiens GN=ENGASE PE=1 SV=1	23.54	control_2
Q03923	Zinc finger protein 85 OS=Homo sapiens GN=ZNF85 PE=1 SV=3	240.58	control_2
Q8TES7	Fas-binding factor 1 OS=Homo sapiens GN=FBF1 PE=1 SV=2	40.8	control_2
Q8TF45	Zinc finger protein 418 OS=Homo sapiens GN=ZNF418 PE=1 SV=2	62.52	control_2
Q8TF40	Folliculin-interacting protein 1 OS=Homo sapiens GN=FNIP1 PE=1 SV=3	125.16	control_2
Q9UMZ2	Synergin gamma OS=Homo sapiens GN=SYNRG PE=1 SV=2	54.18	control_2
Q86UT6	NLR family member X1 OS=Homo sapiens GN=NLRX1 PE=1 SV=1	10.84	control_2
Q9BXM0	Periaxin OS=Homo sapiens GN=PRX PE=1 SV=2	34.23	control_2
Q14195	Dihydropyrimidinase-related protein 3 OS=Homo sapiens GN=DPYSL3 PE=1 SV=1	213.46	control_2
Q9H7Y0	Deleted in autism-related protein 1 OS=Homo sapiens GN=CXorf36 PE=2 SV=3	61.77	control_2
Q3ZCV2	Uncharacterized protein C1orf177 OS=Homo sapiens GN=C1orf177 PE=2 SV=3	24.45	control_2
Q9NQ75	Cas scaffolding protein family member 4 OS=Homo sapiens GN=CASS4 PE=1 SV=2	49.47	control_2
Q9NZI6	Transcription factor CP2-like protein 1 OS=Homo sapiens GN=TFCP2L1 PE=2 SV=1	234.92	control_2
Q9BXL7	Caspase recruitment domain-containing protein 11 OS=Homo sapiens GN=CARD11 PE=1 SV=3	55.34	control_2
Q8IWY4	Signal peptide, CUB and EGF-like domain-containing protein 1 OS=Homo sapiens GN=SCUBE1 PE=1 SV=3	27.08	control_2
Q8N3A8	Poly [ADP-ribose] polymerase 8 OS=Homo sapiens GN=PARP8 PE=2 SV=1	29.04	control_2
Q8TF20	Zinc finger protein 721 OS=Homo sapiens GN=ZNF721 PE=2 SV=2	249.54	control_2
Q9C093	Sperm flagellar protein 2 OS=Homo sapiens GN=SPEF2 PE=1 SV=2	65.02	control_2
Q86UR5	Regulating synaptic membrane exocytosis protein 1 OS=Homo sapiens GN=RIMS1 PE=1 SV=1	44.48	control_2
Q96J65	Multidrug resistance-associated protein 9 OS=Homo sapiens GN=ABCC12 PE=1 SV=2	61.99	control_2
Q969U6	F-box/WD repeat-containing protein 5 OS=Homo sapiens GN=FBXW5 PE=1 SV=1	451.71	control_2
Q06278	Aldehyde oxidase OS=Homo sapiens GN=AOX1 PE=1 SV=2	74.36	control_2
Q5GFL6	von Willebrand factor A domain-containing protein 2 OS=Homo sapiens GN=VWA2 PE=1 SV=1	35.51	control_2
Q14164	Inhibitor of nuclear factor kappa-B kinase subunit epsilon OS=Homo sapiens GN=IKBKE PE=1 SV=1	36.44	control_2
Q14162	Scavenger receptor class F member 1 OS=Homo sapiens GN=SCARF1 PE=1 SV=3	112	control_2
O14727	Apoptotic protease-activating factor 1 OS=Homo sapiens GN=APAF1 PE=1 SV=2	26.85	control_2
Q9NSY0	Nuclear receptor-binding protein 2 OS=Homo sapiens GN=NRBP2 PE=2 SV=2	105.09	control_2
Q86Y79	Probable peptidyl-tRNA hydrolase OS=Homo sapiens GN=PTRH1 PE=1 SV=1	171.7	control_2
Q9Y228	TRAF3-interacting JNK-activating modulator OS=Homo sapiens GN=TRAF3IP3 PE=1 SV=2	80.73	control_2
Q14149	MORC family CW-type zinc finger protein 3 OS=Homo sapiens GN=MORC3 PE=1 SV=3	62.12	control_2
Q96IR2	Zinc finger protein 845 OS=Homo sapiens GN=ZNF845 PE=2 SV=3	81.51	control_2
Q96SE7	Zinc finger protein 347 OS=Homo sapiens GN=ZNF347 PE=1 SV=2	13.64	control_2
Q5JRX3	Presequence protease, mitochondrial OS=Homo sapiens GN=PITRM1 PE=1 SV=3	15.91	control_2
Q16678	Cytochrome P450 1B1 OS=Homo sapiens GN=CYP1B1 PE=1 SV=2	95.98	control_2
Q8N9I5	Fatty acid desaturase 6 OS=Homo sapiens GN=FADS6 PE=2 SV=2	50.17	control_2
Q14CX7	N-alpha-acetyltransferase 25, NatB auxiliary subunit OS=Homo sapiens GN=NAA25 PE=1 SV=1	166.77	control_2
Q8TEM1	Nuclear pore membrane glycoprotein 210 OS=Homo sapiens GN=NUP210 PE=1 SV=3	41.25	control_2
Q9UPZ9	Serine/threonine-protein kinase ICK OS=Homo sapiens GN=ICK PE=1 SV=1	40.38	control_2
Q96LW9	Zinc finger and SCAN domain-containing protein 31 OS=Homo sapiens GN=ZSCAN31 PE=1 SV=2	75.23	control_2
P35558	Phosphoenolpyruvate carboxykinase, cytosolic [GTP] OS=Homo sapiens GN=PCK1 PE=1 SV=3	126.15	control_2
P68133	Actin, alpha skeletal muscle OS=Homo sapiens GN=ACTA1 PE=1 SV=1	884.73	control_2
Q96LW1	Zinc finger protein 354B OS=Homo sapiens GN=ZNF354B PE=2 SV=1	66.27	control_2
Q8WUA7	TBC1 domain family member 22A OS=Homo sapiens GN=TBC1D22A PE=1 SV=2	109.52	control_2
Q13043	Serine/threonine-protein kinase 4 OS=Homo sapiens GN=STK4 PE=1 SV=2	56.28	control_2
Q9Y566	SH3 and multiple ankyrin repeat domains protein 1 OS=Homo sapiens GN=SHANK1 PE=1 SV=2	38.7	control_2
P16144	Integrin beta-4 OS=Homo sapiens GN=ITGB4 PE=1 SV=5	123.37	control_2
Q8IZY2	ATP-binding cassette sub-family A member 7 OS=Homo sapiens GN=ABCA7 PE=1 SV=3	37.64	control_2
O95263	High affinity cAMP-specific and IBMX-insensitive 3',5'-cyclic phosphodiesterase 8B OS=Homo sapiens GN=PDE8B PE=1 SV=2	44.8	control_2
Q92674	Centromere protein I OS=Homo sapiens GN=CENPI PE=1 SV=2	32.25	control_2
Q6UWV6	Ectonucleotide pyrophosphatase/phosphodiesterase family member 7 OS=Homo sapiens GN=ENPP7 PE=1 SV=3	156.55	control_2
Q5VU36	Spermatogenesis-associated protein 31A5 OS=Homo sapiens GN=SPATA31A5 PE=3 SV=1	21.57	control_2
O95259	Potassium voltage-gated channel subfamily H member 1 OS=Homo sapiens GN=KCNH1 PE=1 SV=1	32.47	control_2
Q8IX30	Signal peptide, CUB and EGF-like domain-containing protein 3 OS=Homo sapiens GN=SCUBE3 PE=1 SV=1	15.27	control_2
P41252	Isoleucine--tRNA ligase, cytoplasmic OS=Homo sapiens GN=IARS PE=1 SV=2	30.97	control_2
Q96M61	Melanoma-associated antigen B18 OS=Homo sapiens GN=MAGEB18 PE=1 SV=2	38.6	control_2
Q9UPW6	DNA-binding protein SATB2 OS=Homo sapiens GN=SATB2 PE=1 SV=2	288.85	control_2
Q8IWQ3	Serine/threonine-protein kinase BRSK2 OS=Homo sapiens GN=BRSK2 PE=1 SV=3	22.38	control_2
Q5TIA1	Meiosis inhibitor protein 1 OS=Homo sapiens GN=MEI1 PE=2 SV=2	50.35	control_2
Q13017	Rho GTPase-activating protein 5 OS=Homo sapiens GN=ARHGAP5 PE=1 SV=2	42.84	control_2
Q05481	Zinc finger protein 91 OS=Homo sapiens GN=ZNF91 PE=2 SV=2	51.58	control_2
Q9P2K8	Eukaryotic translation initiation factor 2-alpha kinase 4 OS=Homo sapiens GN=EIF2AK4 PE=1 SV=3	19.11	control_2
Q9UPV0	Centrosomal protein of 164 kDa OS=Homo sapiens GN=CEP164 PE=1 SV=3	28.33	control_2
O95239	Chromosome-associated kinesin KIF4A OS=Homo sapiens GN=KIF4A PE=1 SV=3	86.07	control_2
Q8IX12	Cell division cycle and apoptosis regulator protein 1 OS=Homo sapiens GN=CCAR1 PE=1 SV=2	49.39	control_2
Q86XP0	Cytosolic phospholipase A2 delta OS=Homo sapiens GN=PLA2G4D PE=2 SV=2	41.87	control_2
O95232	Luc7-like protein 3 OS=Homo sapiens GN=LUC7L3 PE=1 SV=2	14.78	control_2
P40145	Adenylate cyclase type 8 OS=Homo sapiens GN=ADCY8 PE=1 SV=1	15.51	control_2
Q8TBB1	E3 ubiquitin-protein ligase LNX OS=Homo sapiens GN=LNX1 PE=1 SV=1	23.26	control_2
P62807	Histone H2B type 1-C/E/F/G/I OS=Homo sapiens GN=HIST1H2BC PE=1 SV=4	1643.5	control_2
Q16620	BDNF/NT-3 growth factors receptor OS=Homo sapiens GN=NTRK2 PE=1 SV=1	106.08	control_2
O43248	Homeobox protein Hox-C11 OS=Homo sapiens GN=HOXC11 PE=1 SV=1	2.36	control_2
A4D126	Isoprenoid synthase domain-containing protein OS=Homo sapiens GN=ISPD PE=1 SV=2	179	control_2
P36954	DNA-directed RNA polymerase II subunit RPB9 OS=Homo sapiens GN=POLR2I PE=1 SV=1	300.27	control_2
P16104	Histone H2AX OS=Homo sapiens GN=H2AFX PE=1 SV=2	10189.5	control_2
P08572	Collagen alpha-2(IV) chain OS=Homo sapiens GN=COL4A2 PE=1 SV=4	124.65	control_2
Q9H7N4	Splicing factor, arginine/serine-rich 19 OS=Homo sapiens GN=SCAF1 PE=1 SV=3	30.49	control_2
Q6W3E5	Glycerophosphodiester phosphodiesterase domain-containing protein 4 OS=Homo sapiens GN=GDPD4 PE=2 SV=1	42.6	control_2
O75096	Low-density lipoprotein receptor-related protein 4 OS=Homo sapiens GN=LRP4 PE=1 SV=4	56.91	control_2
O75093	Slit homolog 1 protein OS=Homo sapiens GN=SLIT1 PE=2 SV=4	85.59	control_2
Q7Z3V4	Ubiquitin-protein ligase E3B OS=Homo sapiens GN=UBE3B PE=1 SV=3	53.15	control_2
P00748	Coagulation factor XII OS=Homo sapiens GN=F12 PE=1 SV=3	6.45	control_2
Q6U841	Sodium-driven chloride bicarbonate exchanger OS=Homo sapiens GN=SLC4A10 PE=2 SV=1	58.89	control_2
Q6PIF6	Unconventional myosin-VIIb OS=Homo sapiens GN=MYO7B PE=1 SV=2	36.76	control_2
Q92622	Run domain Beclin-1 interacting and cysteine-rich containing protein OS=Homo sapiens GN=KIAA0226 PE=1 SV=4	16.29	control_2
Q16602	Calcitonin gene-related peptide type 1 receptor OS=Homo sapiens GN=CALCRL PE=1 SV=2	68.06	control_2
P00736	Complement C1r subcomponent OS=Homo sapiens GN=C1R PE=1 SV=2	14.76	control_2
P00734	Prothrombin OS=Homo sapiens GN=F2 PE=1 SV=2	20.58	control_2
Q92615	La-related protein 4B OS=Homo sapiens GN=LARP4B PE=1 SV=3	70.83	control_2
A6NHR8	Putative protein FAM47D OS=Homo sapiens GN=FAM47DP PE=5 SV=3	4.39	control_2
Q92973	Transportin-1 OS=Homo sapiens GN=TNPO1 PE=1 SV=2	57.96	control_2
O00213	Amyloid beta A4 precursor protein-binding family B member 1 OS=Homo sapiens GN=APBB1 PE=1 SV=2	35.65	control_2
Q13698	Voltage-dependent L-type calcium channel subunit alpha-1S OS=Homo sapiens GN=CACNA1S PE=1 SV=4	27.37	control_2
O00571	ATP-dependent RNA helicase DDX3X OS=Homo sapiens GN=DDX3X PE=1 SV=3	105.79	control_2
P25774	Cathepsin S OS=Homo sapiens GN=CTSS PE=1 SV=3	9.97	control_2
Q92608	Dedicator of cytokinesis protein 2 OS=Homo sapiens GN=DOCK2 PE=1 SV=2	74.75	control_2
Q562R1	Beta-actin-like protein 2 OS=Homo sapiens GN=ACTBL2 PE=1 SV=2	75.76	control_2
Q641Q2	WASH complex subunit FAM21A OS=Homo sapiens GN=FAM21A PE=1 SV=3	25.73	control_2
O00562	Membrane-associated phosphatidylinositol transfer protein 1 OS=Homo sapiens GN=PITPNM1 PE=1 SV=4	8.45	control_2
Q9UPQ4	Tripartite motif-containing protein 35 OS=Homo sapiens GN=TRIM35 PE=1 SV=2	93.56	control_2
Q6UX01	Protein LMBR1L OS=Homo sapiens GN=LMBR1L PE=1 SV=2	26.2	control_2
Q5VWQ0	Round spermatid basic protein 1 OS=Homo sapiens GN=RSBN1 PE=1 SV=2	26.8	control_2
Q86UE4	Protein LYRIC OS=Homo sapiens GN=MTDH PE=1 SV=2	14.42	control_2
Q69YN4	Protein virilizer homolog OS=Homo sapiens GN=KIAA1429 PE=1 SV=2	22.28	control_2
Q96P50	Arf-GAP with coiled-coil, ANK repeat and PH domain-containing protein 3 OS=Homo sapiens GN=ACAP3 PE=1 SV=2	15.5	control_2
Q13310	Polyadenylate-binding protein 4 OS=Homo sapiens GN=PABPC4 PE=1 SV=1	37.64	control_2
Q9P2E5	Chondroitin sulfate glucuronyltransferase OS=Homo sapiens GN=CHPF2 PE=2 SV=2	20.22	control_2
Q9P2E3	NFX1-type zinc finger-containing protein 1 OS=Homo sapiens GN=ZNFX1 PE=2 SV=2	31.26	control_2
B4DXR9	Zinc finger protein 732 OS=Homo sapiens GN=ZNF732 PE=2 SV=1	221.38	control_2
P80192	Mitogen-activated protein kinase kinase kinase 9 OS=Homo sapiens GN=MAP3K9 PE=1 SV=3	49.49	control_2
Q9NVR5	Protein kintoun OS=Homo sapiens GN=DNAAF2 PE=1 SV=2	57.71	control_2
O00541	Pescadillo homolog OS=Homo sapiens GN=PES1 PE=1 SV=1	6.76	control_2
Q9NVR0	Kelch-like protein 11 OS=Homo sapiens GN=KLHL11 PE=1 SV=1	12.96	control_2
Q8NEV4	Myosin-IIIa OS=Homo sapiens GN=MYO3A PE=2 SV=2	44.57	control_2
Q08J23	tRNA (cytosine(34)-C(5))-methyltransferase OS=Homo sapiens GN=NSUN2 PE=1 SV=2	8.58	control_2
Q9P2D6	Protein FAM135A OS=Homo sapiens GN=FAM135A PE=1 SV=2	130.29	control_2
Q86XI8	Uncharacterized protein C19orf68 OS=Homo sapiens GN=C19orf68 PE=1 SV=2	3.41	control_2
P16403	Histone H1.2 OS=Homo sapiens GN=HIST1H1C PE=1 SV=2	411.7	control_2
P16401	Histone H1.5 OS=Homo sapiens GN=HIST1H1B PE=1 SV=3	266.13	control_2
O75038	1-phosphatidylinositol 4,5-bisphosphate phosphodiesterase eta-2 OS=Homo sapiens GN=PLCH2 PE=2 SV=3	45.73	control_2
O75037	Kinesin-like protein KIF21B OS=Homo sapiens GN=KIF21B PE=1 SV=2	54.58	control_2
Q9UPN7	Serine/threonine-protein phosphatase 6 regulatory subunit 1 OS=Homo sapiens GN=PPP6R1 PE=1 SV=5	57.6	control_2
O60765	Zinc finger protein 354A OS=Homo sapiens GN=ZNF354A PE=2 SV=2	155.32	control_2
O43896	Kinesin-like protein KIF1C OS=Homo sapiens GN=KIF1C PE=1 SV=3	32.53	control_2
P15309	Prostatic acid phosphatase OS=Homo sapiens GN=ACPP PE=1 SV=3	20.3	control_2
A0AVT1	Ubiquitin-like modifier-activating enzyme 6 OS=Homo sapiens GN=UBA6 PE=1 SV=1	41.07	control_2
Q92922	SWI/SNF complex subunit SMARCC1 OS=Homo sapiens GN=SMARCC1 PE=1 SV=3	28.57	control_2
O94788	Retinal dehydrogenase 2 OS=Homo sapiens GN=ALDH1A2 PE=1 SV=3	48.31	control_2
Q8NF50	Dedicator of cytokinesis protein 8 OS=Homo sapiens GN=DOCK8 PE=1 SV=3	55.08	control_2
Q6XPS3	Phosphatidylinositol 3,4,5-trisphosphate 3-phosphatase TPTE2 OS=Homo sapiens GN=TPTE2 PE=1 SV=2	24.23	control_2
Q14721	Potassium voltage-gated channel subfamily B member 1 OS=Homo sapiens GN=KCNB1 PE=1 SV=2	144.98	control_2
Q6XZF7	Dynamin-binding protein OS=Homo sapiens GN=DNMBP PE=1 SV=1	112.51	control_2
P48594	Serpin B4 OS=Homo sapiens GN=SERPINB4 PE=1 SV=2	87.67	control_2
Q6ZV73	FYVE, RhoGEF and PH domain-containing protein 6 OS=Homo sapiens GN=FGD6 PE=1 SV=2	74.31	control_2
P55039	Developmentally-regulated GTP-binding protein 2 OS=Homo sapiens GN=DRG2 PE=1 SV=1	56.15	control_2
Q8IZL9	Cyclin-dependent kinase 20 OS=Homo sapiens GN=CDK20 PE=1 SV=1	86	control_2
P22455	Fibroblast growth factor receptor 4 OS=Homo sapiens GN=FGFR4 PE=1 SV=2	63.13	control_2
Q92902	Hermansky-Pudlak syndrome 1 protein OS=Homo sapiens GN=HPS1 PE=1 SV=2	8.89	control_2
Q6XPR3	Repetin OS=Homo sapiens GN=RPTN PE=1 SV=1	13.82	control_2
Q92901	60S ribosomal protein L3-like OS=Homo sapiens GN=RPL3L PE=2 SV=3	141.86	control_2
Q8IWE5	Pleckstrin homology domain-containing family M member 2 OS=Homo sapiens GN=PLEKHM2 PE=1 SV=2	65.83	control_2
Q7Z736	Pleckstrin homology domain-containing family H member 3 OS=Homo sapiens GN=PLEKHH3 PE=1 SV=2	103.4	control_2
A6NHJ4	Zinc finger protein 860 OS=Homo sapiens GN=ZNF860 PE=2 SV=3	87.6	control_2
O75351	Vacuolar protein sorting-associated protein 4B OS=Homo sapiens GN=VPS4B PE=1 SV=2	44.91	control_2
P09917	Arachidonate 5-lipoxygenase OS=Homo sapiens GN=ALOX5 PE=1 SV=2	74.48	control_2
Q6ZUT9	DENN domain-containing protein 5B OS=Homo sapiens GN=DENND5B PE=1 SV=2	32.89	control_2
Q9Y4F4	Protein FAM179B OS=Homo sapiens GN=FAM179B PE=1 SV=4	58.98	control_2
Q99985	Semaphorin-3C OS=Homo sapiens GN=SEMA3C PE=2 SV=2	14.97	control_2
Q5VWJ9	Sorting nexin-30 OS=Homo sapiens GN=SNX30 PE=1 SV=1	8.44	control_2
Q9Y4F1	FERM, RhoGEF and pleckstrin domain-containing protein 1 OS=Homo sapiens GN=FARP1 PE=1 SV=1	58.45	control_2
Q6P2P2	Putative protein arginine N-methyltransferase 9 OS=Homo sapiens GN=PRMT9 PE=2 SV=1	21.81	control_2
P63267	Actin, gamma-enteric smooth muscle OS=Homo sapiens GN=ACTG2 PE=1 SV=1	878.51	control_2
Q8TB69	Zinc finger protein 519 OS=Homo sapiens GN=ZNF519 PE=2 SV=2	21.02	control_2
O75346	Zinc finger protein 253 OS=Homo sapiens GN=ZNF253 PE=2 SV=2	9.94	control_2
Q6WBX8	Cell cycle checkpoint control protein RAD9B OS=Homo sapiens GN=RAD9B PE=1 SV=2	37.8	control_2
O75342	Arachidonate 12-lipoxygenase, 12R-type OS=Homo sapiens GN=ALOX12B PE=1 SV=1	28.96	control_2
Q93098	Protein Wnt-8b OS=Homo sapiens GN=WNT8B PE=2 SV=3	83.2	control_2
Q9Y4E1	WASH complex subunit FAM21C OS=Homo sapiens GN=FAM21C PE=1 SV=3	37.32	control_2
Q5THR3	EF-hand calcium-binding domain-containing protein 6 OS=Homo sapiens GN=EFCAB6 PE=1 SV=1	56.33	control_2
O75335	Liprin-alpha-4 OS=Homo sapiens GN=PPFIA4 PE=2 SV=3	37.65	control_2
O75334	Liprin-alpha-2 OS=Homo sapiens GN=PPFIA2 PE=1 SV=2	38.78	control_2
A2RRD8	Zinc finger protein 320 OS=Homo sapiens GN=ZNF320 PE=1 SV=1	77.39	control_2
Q8N8V2	Guanylate-binding protein 7 OS=Homo sapiens GN=GBP7 PE=2 SV=2	144.35	control_2
Q8NBI6	Xyloside xylosyltransferase 1 OS=Homo sapiens GN=XXYLT1 PE=1 SV=1	25.18	control_2
Q9Y4D2	Sn1-specific diacylglycerol lipase alpha OS=Homo sapiens GN=DAGLA PE=1 SV=3	61.35	control_2
Q9Y4D1	Disheveled-associated activator of morphogenesis 1 OS=Homo sapiens GN=DAAM1 PE=1 SV=2	30.89	control_2
Q8IWB6	Inactive serine/threonine-protein kinase TEX14 OS=Homo sapiens GN=TEX14 PE=1 SV=2	64.08	control_2
O60706	ATP-binding cassette sub-family C member 9 OS=Homo sapiens GN=ABCC9 PE=1 SV=2	22.94	control_2
Q8IWB4	Spermatogenesis-associated protein 31A7 OS=Homo sapiens GN=SPATA31A7 PE=2 SV=4	8.61	control_2
P22413	Ectonucleotide pyrophosphatase/phosphodiesterase family member 1 OS=Homo sapiens GN=ENPP1 PE=1 SV=2	51.27	control_2
P46019	Phosphorylase b kinase regulatory subunit alpha, liver isoform OS=Homo sapiens GN=PHKA2 PE=1 SV=1	13.09	control_2
Q5TI25	Neuroblastoma breakpoint family member 14 OS=Homo sapiens GN=NBPF14 PE=2 SV=2	7.04	control_2
Q5JUK3	Potassium channel subfamily T member 1 OS=Homo sapiens GN=KCNT1 PE=1 SV=2	52.7	control_2
Q93079	Histone H2B type 1-H OS=Homo sapiens GN=HIST1H2BH PE=1 SV=3	1643.5	control_2
Q9Y4C4	Malignant fibrous histiocytoma-amplified sequence 1 OS=Homo sapiens GN=MFHAS1 PE=1 SV=2	34.39	control_2
Q93077	Histone H2A type 1-C OS=Homo sapiens GN=HIST1H2AC PE=1 SV=3	10183.7	control_2
Q93074	Mediator of RNA polymerase II transcription subunit 12 OS=Homo sapiens GN=MED12 PE=1 SV=4	14.35	control_2
Q9Y4C0	Neurexin-3 OS=Homo sapiens GN=NRXN3 PE=1 SV=4	49.18	control_2
Q6VB85	Forkhead box protein D4-like 2 OS=Homo sapiens GN=FOXD4L2 PE=2 SV=2	12.35	control_2
Q17RY0	Cytoplasmic polyadenylation element-binding protein 4 OS=Homo sapiens GN=CPEB4 PE=1 SV=1	125.35	control_2
Q9BTM1	Histone H2A.J OS=Homo sapiens GN=H2AFJ PE=1 SV=1	10183.7	control_2
P05534	HLA class I histocompatibility antigen, A-24 alpha chain OS=Homo sapiens GN=HLA-A PE=1 SV=2	3.91	control_2
Q9BX40	Protein LSM14 homolog B OS=Homo sapiens GN=LSM14B PE=1 SV=1	51.46	control_2
Q96F81	Protein dispatched homolog 1 OS=Homo sapiens GN=DISP1 PE=1 SV=3	25.22	control_2
Q96S15	WD repeat-containing protein 24 OS=Homo sapiens GN=WDR24 PE=1 SV=1	29.69	control_2
Q9NVI1	Fanconi anemia group I protein OS=Homo sapiens GN=FANCI PE=1 SV=4	89.06	control_2
Q9Y4B5	Microtubule cross-linking factor 1 OS=Homo sapiens GN=MTCL1 PE=1 SV=5	127.41	control_2
O15438	Canalicular multispecific organic anion transporter 2 OS=Homo sapiens GN=ABCC3 PE=1 SV=3	31.63	control_2
Q3MIS6	Zinc finger protein 528 OS=Homo sapiens GN=ZNF528 PE=2 SV=1	59.3	control_2
Q8IZF0	Sodium leak channel non-selective protein OS=Homo sapiens GN=NALCN PE=1 SV=1	25.75	control_2
P82987	ADAMTS-like protein 3 OS=Homo sapiens GN=ADAMTSL3 PE=1 SV=4	27.66	control_2
Q9UJ98	Cohesin subunit SA-3 OS=Homo sapiens GN=STAG3 PE=1 SV=2	28.35	control_2
Q02779	Mitogen-activated protein kinase kinase kinase 10 OS=Homo sapiens GN=MAP3K10 PE=1 SV=3	111.37	control_2
Q17RW2	Collagen alpha-1(XXIV) chain OS=Homo sapiens GN=COL24A1 PE=1 SV=2	87.81	control_2
Q9BX26	Synaptonemal complex protein 2 OS=Homo sapiens GN=SYCP2 PE=2 SV=2	111.59	control_2
O15427	Monocarboxylate transporter 4 OS=Homo sapiens GN=SLC16A3 PE=1 SV=1	121.13	control_2
Q12834	Cell division cycle protein 20 homolog OS=Homo sapiens GN=CDC20 PE=1 SV=2	80.38	control_2
A0AVK6	Transcription factor E2F8 OS=Homo sapiens GN=E2F8 PE=1 SV=1	45.17	control_2
P29475	Nitric oxide synthase, brain OS=Homo sapiens GN=NOS1 PE=1 SV=2	70.52	control_2
Q8TDV5	Glucose-dependent insulinotropic receptor OS=Homo sapiens GN=GPR119 PE=1 SV=1	152.61	control_2
Q96RN1	Testis anion transporter 1 OS=Homo sapiens GN=SLC26A8 PE=1 SV=1	20.94	control_2
Q9UG22	GTPase IMAP family member 2 OS=Homo sapiens GN=GIMAP2 PE=1 SV=2	46.43	control_2
Q7L2R6	Zinc finger protein 765 OS=Homo sapiens GN=ZNF765 PE=1 SV=2	63.98	control_2
Q7Z6L1	Tectonin beta-propeller repeat-containing protein 1 OS=Homo sapiens GN=TECPR1 PE=1 SV=1	6.45	control_2
Q86U86	Protein polybromo-1 OS=Homo sapiens GN=PBRM1 PE=1 SV=1	31.19	control_2
Q96BN6	Protein FAM149B1 OS=Homo sapiens GN=FAM149B1 PE=2 SV=2	176.89	control_2
Q8IZD2	Histone-lysine N-methyltransferase 2E OS=Homo sapiens GN=KMT2E PE=1 SV=1	47.81	control_2
Q2M2I8	AP2-associated protein kinase 1 OS=Homo sapiens GN=AAK1 PE=1 SV=3	29.93	control_2
Q96LA5	Fc receptor-like protein 2 OS=Homo sapiens GN=FCRL2 PE=1 SV=1	79.99	control_2
Q5JRA6	Melanoma inhibitory activity protein 3 OS=Homo sapiens GN=MIA3 PE=1 SV=1	52.03	control_2
Q6AWC2	Protein WWC2 OS=Homo sapiens GN=WWC2 PE=1 SV=2	67.89	control_2
P30622	CAP-Gly domain-containing linker protein 1 OS=Homo sapiens GN=CLIP1 PE=1 SV=2	57.75	control_2
Q8N2E2	von Willebrand factor D and EGF domain-containing protein OS=Homo sapiens GN=VWDE PE=2 SV=4	11.82	control_2
B7Z6K7	Putative uncharacterized zinc finger protein 814 OS=Homo sapiens GN=ZNF814 PE=1 SV=2	26.39	control_2
O75643	U5 small nuclear ribonucleoprotein 200 kDa helicase OS=Homo sapiens GN=SNRNP200 PE=1 SV=2	88.49	control_2
Q7Z3E2	Coiled-coil domain-containing protein 186 OS=Homo sapiens GN=CCDC186 PE=1 SV=2	84.99	control_2
Q9NYL2	Mitogen-activated protein kinase kinase kinase MLT OS=Homo sapiens GN=ZAK PE=1 SV=3	3.01	control_2
Q9P286	Serine/threonine-protein kinase PAK 7 OS=Homo sapiens GN=PAK7 PE=1 SV=1	37.1	control_2
Q8IZC6	Collagen alpha-1(XXVII) chain OS=Homo sapiens GN=COL27A1 PE=1 SV=1	53.66	control_2
Q9P283	Semaphorin-5B OS=Homo sapiens GN=SEMA5B PE=2 SV=4	26.64	control_2
Q3MJ16	Cytosolic phospholipase A2 epsilon OS=Homo sapiens GN=PLA2G4E PE=2 SV=3	25.06	control_2
Q3SXZ7	Probable tubulin polyglutamylase TTLL9 OS=Homo sapiens GN=TTLL9 PE=2 SV=3	39.47	control_2
Q149M9	NACHT domain- and WD repeat-containing protein 1 OS=Homo sapiens GN=NWD1 PE=1 SV=3	110.55	control_2
Q3SXZ3	Zinc finger protein 718 OS=Homo sapiens GN=ZNF718 PE=2 SV=1	252.68	control_2
P15918	V(D)J recombination-activating protein 1 OS=Homo sapiens GN=RAG1 PE=1 SV=2	52.26	control_2
Q9NVE4	Coiled-coil domain-containing protein 87 OS=Homo sapiens GN=CCDC87 PE=1 SV=2	57.15	control_2
Q6S8J7	POTE ankyrin domain family member A OS=Homo sapiens GN=POTEA PE=2 SV=1	3.32	control_2
Q9H3T3	Semaphorin-6B OS=Homo sapiens GN=SEMA6B PE=1 SV=4	75.35	control_2
Q09470	Potassium voltage-gated channel subfamily A member 1 OS=Homo sapiens GN=KCNA1 PE=1 SV=2	347.68	control_2
Q96RK4	Bardet-Biedl syndrome 4 protein OS=Homo sapiens GN=BBS4 PE=1 SV=2	38.76	control_2
Q9HD40	O-phosphoseryl-tRNA(Sec) selenium transferase OS=Homo sapiens GN=SEPSECS PE=1 SV=2	3.31	control_2
Q9NP80	Calcium-independent phospholipase A2-gamma OS=Homo sapiens GN=PNPLA8 PE=1 SV=1	62.94	control_2
Q8WWN8	Arf-GAP with Rho-GAP domain, ANK repeat and PH domain-containing protein 3 OS=Homo sapiens GN=ARAP3 PE=1 SV=1	90.31	control_2
A6NNM3	RIMS-binding protein 3B OS=Homo sapiens GN=RIMBP3B PE=3 SV=3	34.99	control_2
P25092	Heat-stable enterotoxin receptor OS=Homo sapiens GN=GUCY2C PE=1 SV=2	71.56	control_2
A8MXY4	Zinc finger protein 99 OS=Homo sapiens GN=ZNF99 PE=2 SV=3	33.13	control_2
Q86WZ0	HEAT repeat-containing protein 4 OS=Homo sapiens GN=HEATR4 PE=2 SV=2	91.03	control_2
Q68DY1	Zinc finger protein 626 OS=Homo sapiens GN=ZNF626 PE=2 SV=2	19.51	control_2
Q5H9T9	Fibrous sheath CABYR-binding protein OS=Homo sapiens GN=FSCB PE=2 SV=3	42.76	control_2
O14654	Insulin receptor substrate 4 OS=Homo sapiens GN=IRS4 PE=1 SV=1	43.49	control_2
Q7Z3B3	KAT8 regulatory NSL complex subunit 1 OS=Homo sapiens GN=KANSL1 PE=1 SV=2	8.93	control_2
Q8NHM5	Lysine-specific demethylase 2B OS=Homo sapiens GN=KDM2B PE=1 SV=1	58.42	control_2
Q53EP0	Fibronectin type III domain-containing protein 3B OS=Homo sapiens GN=FNDC3B PE=1 SV=2	38.85	control_2
P28340	DNA polymerase delta catalytic subunit OS=Homo sapiens GN=POLD1 PE=1 SV=2	37.19	control_2
Q9P255	Zinc finger protein 492 OS=Homo sapiens GN=ZNF492 PE=2 SV=2	33.77	control_2
Q9P253	Vacuolar protein sorting-associated protein 18 homolog OS=Homo sapiens GN=VPS18 PE=1 SV=2	37.38	control_2
Q9H792	Pseudopodium-enriched atypical kinase 1 OS=Homo sapiens GN=PEAK1 PE=1 SV=4	88.43	control_2
Q17RQ9	NTPase KAP family P-loop domain-containing protein 1 OS=Homo sapiens GN=NKPD1 PE=2 SV=1	210.92	control_2
Q49A88	Coiled-coil domain-containing protein 14 OS=Homo sapiens GN=CCDC14 PE=1 SV=3	253.21	control_2
Q9P246	Stromal interaction molecule 2 OS=Homo sapiens GN=STIM2 PE=1 SV=2	28.59	control_2
Q06187	Tyrosine-protein kinase BTK OS=Homo sapiens GN=BTK PE=1 SV=3	67.96	control_2
Q5T5C0	Syntaxin-binding protein 5 OS=Homo sapiens GN=STXBP5 PE=1 SV=1	20.25	control_2
Q71UI9	Histone H2A.V OS=Homo sapiens GN=H2AFV PE=1 SV=3	1478.94	control_2
Q6FI13	Histone H2A type 2-A OS=Homo sapiens GN=HIST2H2AA3 PE=1 SV=3	900.64	control_2
P30926	Neuronal acetylcholine receptor subunit beta-4 OS=Homo sapiens GN=CHRNB4 PE=1 SV=2	40.79	control_2
O14983	Sarcoplasmic/endoplasmic reticulum calcium ATPase 1 OS=Homo sapiens GN=ATP2A1 PE=1 SV=1	92.76	control_2
P42285	Superkiller viralicidic activity 2-like 2 OS=Homo sapiens GN=SKIV2L2 PE=1 SV=3	19.93	control_2
Q09428	ATP-binding cassette sub-family C member 8 OS=Homo sapiens GN=ABCC8 PE=1 SV=6	67.92	control_2
Q8IVV2	Lipoxygenase homology domain-containing protein 1 OS=Homo sapiens GN=LOXHD1 PE=2 SV=3	82.08	control_2
Q9P218	Collagen alpha-1(XX) chain OS=Homo sapiens GN=COL20A1 PE=1 SV=4	108	control_2
P0CB48	Putative upstream-binding factor 1-like protein 6 OS=Homo sapiens GN=UBTFL6 PE=5 SV=1	58.34	control_2
A8MXT2	Melanoma-associated antigen B17 OS=Homo sapiens GN=MAGEB17 PE=3 SV=3	18.51	control_2
Q96L92	Sorting nexin-27 OS=Homo sapiens GN=SNX27 PE=1 SV=2	74.49	control_2
P10412	Histone H1.4 OS=Homo sapiens GN=HIST1H1E PE=1 SV=2	491.74	control_2
Q9HCM1	Uncharacterized protein KIAA1551 OS=Homo sapiens GN=KIAA1551 PE=1 SV=3	48.45	control_2
Q8NEB9	Phosphatidylinositol 3-kinase catalytic subunit type 3 OS=Homo sapiens GN=PIK3C3 PE=1 SV=1	39.44	control_2
P0CB33	Putative zinc finger protein 735 OS=Homo sapiens GN=ZNF735 PE=5 SV=1	212.85	control_2
Q96RD9	Fc receptor-like protein 5 OS=Homo sapiens GN=FCRL5 PE=1 SV=3	4.2	control_2
Q9H6S0	Probable ATP-dependent RNA helicase YTHDC2 OS=Homo sapiens GN=YTHDC2 PE=1 SV=2	50.91	control_2
P68032	Actin, alpha cardiac muscle 1 OS=Homo sapiens GN=ACTC1 PE=1 SV=1	884.73	control_2
P35452	Homeobox protein Hox-D12 OS=Homo sapiens GN=HOXD12 PE=1 SV=3	205.95	control_2
Q16206	Ecto-NOX disulfide-thiol exchanger 2 OS=Homo sapiens GN=ENOX2 PE=1 SV=2	9.77	control_2
A6NNF4	Zinc finger protein 726 OS=Homo sapiens GN=ZNF726 PE=2 SV=4	50.78	control_2
Q15477	Helicase SKI2W OS=Homo sapiens GN=SKIV2L PE=1 SV=3	12.39	control_2
Q49A33	Putative zinc finger protein 876 OS=Homo sapiens GN=ZNF876P PE=5 SV=3	234.49	control_2
Q5SQ80	Ankyrin repeat domain-containing protein 20A2 OS=Homo sapiens GN=ANKRD20A2 PE=3 SV=1	39.53	control_2
Q86WS4	Uncharacterized protein C12orf40 OS=Homo sapiens GN=C12orf40 PE=1 SV=3	44.67	control_2
E7ETH6	Zinc finger protein 587B OS=Homo sapiens GN=ZNF587B PE=1 SV=1	46.86	control_2
Q92574	Hamartin OS=Homo sapiens GN=TSC1 PE=1 SV=2	61.22	control_2
Q96HP0	Dedicator of cytokinesis protein 6 OS=Homo sapiens GN=DOCK6 PE=1 SV=3	49.67	control_2
P35442	Thrombospondin-2 OS=Homo sapiens GN=THBS2 PE=1 SV=2	52.16	control_2
P62736	Actin, aortic smooth muscle OS=Homo sapiens GN=ACTA2 PE=1 SV=1	878.51	control_2
Q5H9M0	PWWP domain-containing protein MUM1L1 OS=Homo sapiens GN=MUM1L1 PE=2 SV=1	38.66	control_2
Q6WKZ4	Rab11 family-interacting protein 1 OS=Homo sapiens GN=RAB11FIP1 PE=1 SV=3	57.3	control_2
P17481	Homeobox protein Hox-B8 OS=Homo sapiens GN=HOXB8 PE=2 SV=2	76.05	control_2
P0C221	Coiled-coil domain-containing protein 175 OS=Homo sapiens GN=CCDC175 PE=4 SV=2	31.25	control_2
Q8IYX0	Zinc finger protein 679 OS=Homo sapiens GN=ZNF679 PE=1 SV=2	212.85	control_2
Q6PL18	ATPase family AAA domain-containing protein 2 OS=Homo sapiens GN=ATAD2 PE=1 SV=1	14.06	control_2
A6H8M9	Cadherin-related family member 4 OS=Homo sapiens GN=CDHR4 PE=2 SV=1	39.29	control_2
Q92560	Ubiquitin carboxyl-terminal hydrolase BAP1 OS=Homo sapiens GN=BAP1 PE=1 SV=2	17.87	control_2
Q9HCJ0	Trinucleotide repeat-containing gene 6C protein OS=Homo sapiens GN=TNRC6C PE=1 SV=3	16.58	control_2
Q6F5E8	Leucine-rich repeat-containing protein 16C OS=Homo sapiens GN=RLTPR PE=1 SV=2	28.45	control_2
Q9NYA4	Myotubularin-related protein 4 OS=Homo sapiens GN=MTMR4 PE=1 SV=2	36.61	control_2
A6NGW2	Putative stereocilin-like protein OS=Homo sapiens GN=STRCP1 PE=5 SV=1	23.27	control_2
Q9Y3S1	Serine/threonine-protein kinase WNK2 OS=Homo sapiens GN=WNK2 PE=1 SV=4	30.78	control_2
Q15459	Splicing factor 3A subunit 1 OS=Homo sapiens GN=SF3A1 PE=1 SV=1	335.19	control_2
Q6ZUB1	Spermatogenesis-associated protein 31E1 OS=Homo sapiens GN=SPATA31E1 PE=2 SV=2	73.78	control_2
O43166	Signal-induced proliferation-associated 1-like protein 1 OS=Homo sapiens GN=SIPA1L1 PE=1 SV=4	32.5	control_2
Q7RTU9	Stereocilin OS=Homo sapiens GN=STRC PE=2 SV=1	23.27	control_2
Q9H0D2	Zinc finger protein 541 OS=Homo sapiens GN=ZNF541 PE=2 SV=3	85.04	control_2
Q14008	Cytoskeleton-associated protein 5 OS=Homo sapiens GN=CKAP5 PE=1 SV=3	104.92	control_2
Q5TAT6	Collagen alpha-1(XIII) chain OS=Homo sapiens GN=COL13A1 PE=1 SV=1	45.58	control_2
Q9UFD9	RIMS-binding protein 3A OS=Homo sapiens GN=RIMBP3 PE=1 SV=4	34.99	control_2
A2PYH4	Probable ATP-dependent DNA helicase HFM1 OS=Homo sapiens GN=HFM1 PE=1 SV=2	98.03	control_2
Q5QNW6	Histone H2B type 2-F OS=Homo sapiens GN=HIST2H2BF PE=1 SV=3	1643.5	control_2
Q9Y6X6	Unconventional myosin-XVI OS=Homo sapiens GN=MYO16 PE=2 SV=3	20.21	control_2
O43157	Plexin-B1 OS=Homo sapiens GN=PLXNB1 PE=1 SV=3	53.46	control_2
Q05BV3	Echinoderm microtubule-associated protein-like 5 OS=Homo sapiens GN=EML5 PE=2 SV=3	22.08	control_2
Q9H707	Zinc finger protein 552 OS=Homo sapiens GN=ZNF552 PE=1 SV=2	116.84	control_2
O43151	Methylcytosine dioxygenase TET3 OS=Homo sapiens GN=TET3 PE=1 SV=3	23.55	control_2
O95136	Sphingosine 1-phosphate receptor 2 OS=Homo sapiens GN=S1PR2 PE=1 SV=2	502.79	control_2
Q8N1W2	Zinc finger protein 710 OS=Homo sapiens GN=ZNF710 PE=2 SV=2	17.51	control_2
O00141	Serine/threonine-protein kinase Sgk1 OS=Homo sapiens GN=SGK1 PE=1 SV=2	31.28	control_2
Q6ZQY2	Leucine-rich repeat-containing protein 74B OS=Homo sapiens GN=LRRC74B PE=2 SV=3	56.88	control_2
Q9BPU6	Dihydropyrimidinase-related protein 5 OS=Homo sapiens GN=DPYSL5 PE=1 SV=1	117.01	control_2
Q401N2	Zinc-activated ligand-gated ion channel OS=Homo sapiens GN=ZACN PE=1 SV=2	36.75	control_2
Q15431	Synaptonemal complex protein 1 OS=Homo sapiens GN=SYCP1 PE=1 SV=2	26	control_2
O76082	Solute carrier family 22 member 5 OS=Homo sapiens GN=SLC22A5 PE=1 SV=1	30.31	control_2
Q86X02	Cerebellar degeneration-related protein 2-like OS=Homo sapiens GN=CDR2L PE=1 SV=2	51.82	control_2
Q96L34	MAP/microtubule affinity-regulating kinase 4 OS=Homo sapiens GN=MARK4 PE=1 SV=1	14.07	control_2
Q92896	Golgi apparatus protein 1 OS=Homo sapiens GN=GLG1 PE=1 SV=2	63.06	control_2
Q96KR1	Zinc finger RNA-binding protein OS=Homo sapiens GN=ZFR PE=1 SV=2	15.87	control_2
A6NJZ7	RIMS-binding protein 3C OS=Homo sapiens GN=RIMBP3C PE=1 SV=3	34.99	control_2
Q9BQ52	Zinc phosphodiesterase ELAC protein 2 OS=Homo sapiens GN=ELAC2 PE=1 SV=2	40.22	control_2
A0AUZ9	KAT8 regulatory NSL complex subunit 1-like protein OS=Homo sapiens GN=KANSL1L PE=1 SV=2	25.51	control_2
Q07889	Son of sevenless homolog 1 OS=Homo sapiens GN=SOS1 PE=1 SV=1	77.11	control_2
Q9UIG0	Tyrosine-protein kinase BAZ1B OS=Homo sapiens GN=BAZ1B PE=1 SV=2	62.38	control_2
P53708	Integrin alpha-8 OS=Homo sapiens GN=ITGA8 PE=1 SV=3	46.05	control_2
P0C7X5	Zinc finger protein 806 OS=Homo sapiens GN=ZNF806 PE=3 SV=1	46.14	control_2
Q9BZF3	Oxysterol-binding protein-related protein 6 OS=Homo sapiens GN=OSBPL6 PE=1 SV=1	31.76	control_2
Q5TAP6	U3 small nucleolar RNA-associated protein 14 homolog C OS=Homo sapiens GN=UTP14C PE=1 SV=1	37.17	control_2
Q9HCE7	E3 ubiquitin-protein ligase SMURF1 OS=Homo sapiens GN=SMURF1 PE=1 SV=2	33.76	control_2
O00478	Butyrophilin subfamily 3 member A3 OS=Homo sapiens GN=BTN3A3 PE=1 SV=1	19.99	control_2
Q14683	Structural maintenance of chromosomes protein 1A OS=Homo sapiens GN=SMC1A PE=1 SV=2	83.75	control_2
O00472	RNA polymerase II elongation factor ELL2 OS=Homo sapiens GN=ELL2 PE=1 SV=2	169.54	control_2
Q9UBY0	Sodium/hydrogen exchanger 2 OS=Homo sapiens GN=SLC9A2 PE=2 SV=1	24.95	control_2
Q5VIY5	Zinc finger protein 468 OS=Homo sapiens GN=ZNF468 PE=2 SV=1	127.01	control_2
Q8NB42	Zinc finger protein 527 OS=Homo sapiens GN=ZNF527 PE=2 SV=2	0.69	control_2
O60346	PH domain leucine-rich repeat-containing protein phosphatase 1 OS=Homo sapiens GN=PHLPP1 PE=1 SV=3	11.17	control_2
O60344	Endothelin-converting enzyme 2 OS=Homo sapiens GN=ECE2 PE=1 SV=4	13.97	control_2
Q7RTP6	Protein-methionine sulfoxide oxidase MICAL3 OS=Homo sapiens GN=MICAL3 PE=1 SV=2	79.25	control_2
Q9HCD6	Protein TANC2 OS=Homo sapiens GN=TANC2 PE=1 SV=3	30.2	control_2
Q8N4Y2	EF-hand calcium-binding domain-containing protein 4A OS=Homo sapiens GN=CRACR2B PE=1 SV=3	18.3	control_2
O00463	TNF receptor-associated factor 5 OS=Homo sapiens GN=TRAF5 PE=1 SV=2	62.76	control_2
B4DH59	Neuroblastoma breakpoint family member 26 OS=Homo sapiens GN=NBPF26 PE=5 SV=1	7.04	control_2
Q6P1W5	Uncharacterized protein C1orf94 OS=Homo sapiens GN=C1orf94 PE=1 SV=2	28.62	control_2
P42898	Methylenetetrahydrofolate reductase OS=Homo sapiens GN=MTHFR PE=1 SV=3	18.54	control_2
Q99590	Protein SCAF11 OS=Homo sapiens GN=SCAF11 PE=1 SV=2	76.26	control_2
B7ZC32	Kinesin-like protein KIF28P OS=Homo sapiens GN=KIF28P PE=3 SV=2	67.18	control_2
O15085	Rho guanine nucleotide exchange factor 11 OS=Homo sapiens GN=ARHGEF11 PE=1 SV=1	89.83	control_2
O15084	Serine/threonine-protein phosphatase 6 regulatory ankyrin repeat subunit A OS=Homo sapiens GN=ANKRD28 PE=1 SV=5	46.89	control_2
O60330	Protocadherin gamma-A12 OS=Homo sapiens GN=PCDHGA12 PE=2 SV=1	68.11	control_2
O95447	Lebercilin-like protein OS=Homo sapiens GN=LCA5L PE=1 SV=1	32.65	control_2
Q9NRM2	Zinc finger protein 277 OS=Homo sapiens GN=ZNF277 PE=1 SV=2	200.65	control_2
Q8TDC3	Serine/threonine-protein kinase BRSK1 OS=Homo sapiens GN=BRSK1 PE=1 SV=2	49.98	control_2
A6NK75	Zinc finger protein 98 OS=Homo sapiens GN=ZNF98 PE=2 SV=4	31.51	control_2
Q14BN4	Sarcolemmal membrane-associated protein OS=Homo sapiens GN=SLMAP PE=1 SV=1	20.66	control_2
Q8NB25	Protein FAM184A OS=Homo sapiens GN=FAM184A PE=2 SV=3	47.83	control_2
Q9ULJ3	Zinc finger and BTB domain-containing protein 21 OS=Homo sapiens GN=ZBTB21 PE=1 SV=2	19.81	control_2
Q8NDW4	Zinc finger protein 248 OS=Homo sapiens GN=ZNF248 PE=2 SV=1	138.54	control_2
Q6ZR52	Zinc finger protein 493 OS=Homo sapiens GN=ZNF493 PE=2 SV=3	12.24	control_2
Q5FWF6	Zinc finger protein 789 OS=Homo sapiens GN=ZNF789 PE=2 SV=3	65	control_2
Q5T4T6	Synaptonemal complex protein 2-like OS=Homo sapiens GN=SYCP2L PE=1 SV=2	48	control_2
Q5VVP1	Spermatogenesis-associated protein 31A6 OS=Homo sapiens GN=SPATA31A6 PE=3 SV=1	3.84	control_2
O15072	A disintegrin and metalloproteinase with thrombospondin motifs 3 OS=Homo sapiens GN=ADAMTS3 PE=2 SV=4	48.89	control_2
Q86WJ1	Chromodomain-helicase-DNA-binding protein 1-like OS=Homo sapiens GN=CHD1L PE=1 SV=2	43.5	control_2
Q8N4W9	Zinc finger protein 808 OS=Homo sapiens GN=ZNF808 PE=2 SV=2	61.99	control_2
O00444	Serine/threonine-protein kinase PLK4 OS=Homo sapiens GN=PLK4 PE=1 SV=3	4.64	control_2
O00443	Phosphatidylinositol 4-phosphate 3-kinase C2 domain-containing subunit alpha OS=Homo sapiens GN=PIK3C2A PE=1 SV=2	57.5	control_2
Q9UBV2	Protein sel-1 homolog 1 OS=Homo sapiens GN=SEL1L PE=1 SV=3	5.42	control_2
Q8NDV7	Trinucleotide repeat-containing gene 6A protein OS=Homo sapiens GN=TNRC6A PE=1 SV=2	71.02	control_2
Q6UVM3	Potassium channel subfamily T member 2 OS=Homo sapiens GN=KCNT2 PE=1 SV=1	32.36	control_2
P06241	Tyrosine-protein kinase Fyn OS=Homo sapiens GN=FYN PE=1 SV=3	108.87	control_2
Q4ADV7	RAB6A-GEF complex partner protein 1 OS=Homo sapiens GN=RIC1 PE=1 SV=2	34.03	control_2
P0DKX0	Zinc finger protein 728 OS=Homo sapiens GN=ZNF728 PE=3 SV=1	8.89	control_2
Q92839	Hyaluronan synthase 1 OS=Homo sapiens GN=HAS1 PE=1 SV=2	42.56	control_2
Q14644	Ras GTPase-activating protein 3 OS=Homo sapiens GN=RASA3 PE=1 SV=3	30.04	control_2
Q6PKG0	La-related protein 1 OS=Homo sapiens GN=LARP1 PE=1 SV=2	317.2	control_2
Q5U623	Activating transcription factor 7-interacting protein 2 OS=Homo sapiens GN=ATF7IP2 PE=1 SV=2	12.05	control_2
P58215	Lysyl oxidase homolog 3 OS=Homo sapiens GN=LOXL3 PE=2 SV=1	213.8	control_2
O60664	Perilipin-3 OS=Homo sapiens GN=PLIN3 PE=1 SV=3	959.47	control_2
O15054	Lysine-specific demethylase 6B OS=Homo sapiens GN=KDM6B PE=1 SV=4	75.11	control_2
Q86TB3	Alpha-protein kinase 2 OS=Homo sapiens GN=ALPK2 PE=2 SV=3	33.11	control_2
O43432	Eukaryotic translation initiation factor 4 gamma 3 OS=Homo sapiens GN=EIF4G3 PE=1 SV=2	124.49	control_2
Q96HE7	ERO1-like protein alpha OS=Homo sapiens GN=ERO1A PE=1 SV=2	6.03	control_2
Q8IYN0	Zinc finger protein 100 OS=Homo sapiens GN=ZNF100 PE=2 SV=2	12.52	control_2
Q96KK5	Histone H2A type 1-H OS=Homo sapiens GN=HIST1H2AH PE=1 SV=3	10183.7	control_2
P49590	Probable histidine--tRNA ligase, mitochondrial OS=Homo sapiens GN=HARS2 PE=1 SV=1	17.47	control_2
Q9UBT7	Alpha-catulin OS=Homo sapiens GN=CTNNAL1 PE=1 SV=2	61.4	control_2
Q9UBT6	DNA polymerase kappa OS=Homo sapiens GN=POLK PE=1 SV=1	33.78	control_2
Q8N201	Integrator complex subunit 1 OS=Homo sapiens GN=INTS1 PE=1 SV=2	37.81	control_2
Q9ULG3	Uncharacterized protein KIAA1257 OS=Homo sapiens GN=KIAA1257 PE=2 SV=2	17.48	control_2
Q8NAN2	Protein FAM73A OS=Homo sapiens GN=FAM73A PE=1 SV=1	110.57	control_2
Q9ULG1	DNA helicase INO80 OS=Homo sapiens GN=INO80 PE=1 SV=2	88.84	control_2
Q07820	Induced myeloid leukemia cell differentiation protein Mcl-1 OS=Homo sapiens GN=MCL1 PE=1 SV=3	147.23	control_2
O76000	Putative olfactory receptor 2B3 OS=Homo sapiens GN=OR2B3 PE=3 SV=1	13.95	control_2
Q8IYM0	Protein FAM186B OS=Homo sapiens GN=FAM186B PE=2 SV=2	93.33	control_2
Q03112	MDS1 and EVI1 complex locus protein EVI1 OS=Homo sapiens GN=MECOM PE=1 SV=2	51.26	infected_2
O00418	Eukaryotic elongation factor 2 kinase OS=Homo sapiens GN=EEF2K PE=1 SV=2	12.34	infected_2
Q14623	Indian hedgehog protein OS=Homo sapiens GN=IHH PE=1 SV=4	78.83	infected_2
Q9Y6N6	Laminin subunit gamma-3 OS=Homo sapiens GN=LAMC3 PE=1 SV=3	104.8	infected_2
Q6P1R3	Myb/SANT-like DNA-binding domain-containing protein 2 OS=Homo sapiens GN=MSANTD2 PE=1 SV=1	23.35	infected_2
Q8IVF5	T-lymphoma invasion and metastasis-inducing protein 2 OS=Homo sapiens GN=TIAM2 PE=2 SV=4	71.66	infected_2
Q9P1A6	Disks large-associated protein 2 OS=Homo sapiens GN=DLGAP2 PE=1 SV=4	92.6	infected_2
Q2TAZ0	Autophagy-related protein 2 homolog A OS=Homo sapiens GN=ATG2A PE=1 SV=3	107.53	infected_2
Q92800	Histone-lysine N-methyltransferase EZH1 OS=Homo sapiens GN=EZH1 PE=1 SV=2	18.3	infected_2
Q96QU1	Protocadherin-15 OS=Homo sapiens GN=PCDH15 PE=1 SV=2	74.9	infected_2
Q4VXU2	Polyadenylate-binding protein 1-like OS=Homo sapiens GN=PABPC1L PE=2 SV=1	74.36	infected_2
Q13889	General transcription factor IIH subunit 3 OS=Homo sapiens GN=GTF2H3 PE=1 SV=2	180.46	infected_2
Q6ZU64	Coiled-coil domain-containing protein 108 OS=Homo sapiens GN=CCDC108 PE=1 SV=2	56.65	infected_2
Q8IVE3	Pleckstrin homology domain-containing family H member 2 OS=Homo sapiens GN=PLEKHH2 PE=1 SV=2	34.18	infected_2
P55285	Cadherin-6 OS=Homo sapiens GN=CDH6 PE=1 SV=1	173.95	infected_2
Q2M218	Zinc finger protein 630 OS=Homo sapiens GN=ZNF630 PE=2 SV=1	23.34	infected_2
Q12791	Calcium-activated potassium channel subunit alpha-1 OS=Homo sapiens GN=KCNMA1 PE=1 SV=2	112.94	infected_2
O95741	Copine-6 OS=Homo sapiens GN=CPNE6 PE=1 SV=3	84.33	infected_2
Q9NY46	Sodium channel protein type 3 subunit alpha OS=Homo sapiens GN=SCN3A PE=1 SV=2	126.55	infected_2
Q9ULD9	Zinc finger protein 608 OS=Homo sapiens GN=ZNF608 PE=1 SV=4	203.95	infected_2
Q8N7X1	RNA-binding motif protein, X-linked-like-3 OS=Homo sapiens GN=RBMXL3 PE=2 SV=2	173.71	infected_2
P51805	Plexin-A3 OS=Homo sapiens GN=PLXNA3 PE=1 SV=2	78.16	infected_2
Q8NDQ6	Zinc finger protein 540 OS=Homo sapiens GN=ZNF540 PE=1 SV=1	198.31	infected_2
P34932	Heat shock 70 kDa protein 4 OS=Homo sapiens GN=HSPA4 PE=1 SV=4	171.11	infected_2
Q9BVV6	Protein TALPID3 OS=Homo sapiens GN=KIAA0586 PE=1 SV=4	93.6	infected_2
P05106	Integrin beta-3 OS=Homo sapiens GN=ITGB3 PE=1 SV=2	13.18	infected_2
Q12788	Transducin beta-like protein 3 OS=Homo sapiens GN=TBL3 PE=1 SV=2	7.68	infected_2
O00744	Protein Wnt-10b OS=Homo sapiens GN=WNT10B PE=1 SV=2	45.12	infected_2
Q9Y6K5	2'-5'-oligoadenylate synthase 3 OS=Homo sapiens GN=OAS3 PE=1 SV=3	81.72	infected_2
O95718	Steroid hormone receptor ERR2 OS=Homo sapiens GN=ESRRB PE=1 SV=2	3.11	infected_2
Q8N1I0	Dedicator of cytokinesis protein 4 OS=Homo sapiens GN=DOCK4 PE=1 SV=3	23.02	infected_2
Q6ZNE9	RUN and FYVE domain-containing protein 4 OS=Homo sapiens GN=RUFY4 PE=1 SV=2	143.91	infected_2
O75582	Ribosomal protein S6 kinase alpha-5 OS=Homo sapiens GN=RPS6KA5 PE=1 SV=1	31.5	infected_2
O94986	Centrosomal protein of 152 kDa OS=Homo sapiens GN=CEP152 PE=1 SV=4	54.26	infected_2
Q8NH56	Olfactory receptor 52N5 OS=Homo sapiens GN=OR52N5 PE=2 SV=2	39.35	infected_2
P63135	Endogenous retrovirus group K member 7 Pol protein OS=Homo sapiens GN=ERVK-7 PE=3 SV=1	23.78	infected_2
P57773	Gap junction alpha-9 protein OS=Homo sapiens GN=GJA9 PE=2 SV=2	233.72	infected_2
Q7Z5N4	Protein sidekick-1 OS=Homo sapiens GN=SDK1 PE=2 SV=3	98.89	infected_2
Q13835	Plakophilin-1 OS=Homo sapiens GN=PKP1 PE=1 SV=2	47.87	infected_2
Q9H2X9	Solute carrier family 12 member 5 OS=Homo sapiens GN=SLC12A5 PE=2 SV=3	127	infected_2
P11142	Heat shock cognate 71 kDa protein OS=Homo sapiens GN=HSPA8 PE=1 SV=1	89.18	infected_2
P05423	DNA-directed RNA polymerase III subunit RPC4 OS=Homo sapiens GN=POLR3D PE=1 SV=2	178.82	infected_2
P24821	Tenascin OS=Homo sapiens GN=TNC PE=1 SV=3	38.75	infected_2
Q8TD84	Down syndrome cell adhesion molecule-like protein 1 OS=Homo sapiens GN=DSCAML1 PE=1 SV=2	59.01	infected_2
Q9UF33	Ephrin type-A receptor 6 OS=Homo sapiens GN=EPHA6 PE=2 SV=3	237	infected_2
Q13822	Ectonucleotide pyrophosphatase/phosphodiesterase family member 2 OS=Homo sapiens GN=ENPP2 PE=1 SV=3	57.89	infected_2
O43707	Alpha-actinin-4 OS=Homo sapiens GN=ACTN4 PE=1 SV=2	212.99	infected_2
Q9BSK1	Zinc finger protein 577 OS=Homo sapiens GN=ZNF577 PE=2 SV=3	21.91	infected_2
O15321	Transmembrane 9 superfamily member 1 OS=Homo sapiens GN=TM9SF1 PE=2 SV=2	60.68	infected_2
P30532	Neuronal acetylcholine receptor subunit alpha-5 OS=Homo sapiens GN=CHRNA5 PE=1 SV=2	66.22	infected_2
Q9HC77	Centromere protein J OS=Homo sapiens GN=CENPJ PE=1 SV=2	77.96	infected_2
P30530	Tyrosine-protein kinase receptor UFO OS=Homo sapiens GN=AXL PE=1 SV=3	60.96	infected_2
P29374	AT-rich interactive domain-containing protein 4A OS=Homo sapiens GN=ARID4A PE=1 SV=3	129.98	infected_2
Q9UHW9	Solute carrier family 12 member 6 OS=Homo sapiens GN=SLC12A6 PE=1 SV=2	32.7	infected_2
P54132	Bloom syndrome protein OS=Homo sapiens GN=BLM PE=1 SV=1	142.33	infected_2
A6NJJ6	UPF0575 protein C19orf67 OS=Homo sapiens GN=C19orf67 PE=3 SV=3	368.18	infected_2
Q6P1J6	Phospholipase B1, membrane-associated OS=Homo sapiens GN=PLB1 PE=1 SV=3	77.7	infected_2
Q8IYD8	Fanconi anemia group M protein OS=Homo sapiens GN=FANCM PE=1 SV=2	75.16	infected_2
O15315	DNA repair protein RAD51 homolog 2 OS=Homo sapiens GN=RAD51B PE=1 SV=2	56.84	infected_2
Q9BZ76	Contactin-associated protein-like 3 OS=Homo sapiens GN=CNTNAP3 PE=2 SV=3	53.36	infected_2
Q86T82	Ubiquitin carboxyl-terminal hydrolase 37 OS=Homo sapiens GN=USP37 PE=1 SV=2	52.3	infected_2
Q96NG8	Zinc finger protein 582 OS=Homo sapiens GN=ZNF582 PE=2 SV=1	138.59	infected_2
Q7L1Q6	Basic leucine zipper and W2 domain-containing protein 1 OS=Homo sapiens GN=BZW1 PE=1 SV=1	244.64	infected_2
Q58FF3	Putative endoplasmin-like protein OS=Homo sapiens GN=HSP90B2P PE=5 SV=1	75.66	infected_2
Q86T75	Neuroblastoma breakpoint family member 11 OS=Homo sapiens GN=NBPF11 PE=2 SV=3	10.03	infected_2
Q5T1A1	DC-STAMP domain-containing protein 2 OS=Homo sapiens GN=DCST2 PE=2 SV=2	81.01	infected_2
P11474	Steroid hormone receptor ERR1 OS=Homo sapiens GN=ESRRA PE=1 SV=3	82.54	infected_2
Q9H361	Polyadenylate-binding protein 3 OS=Homo sapiens GN=PABPC3 PE=1 SV=2	116.44	infected_2
P55201	Peregrin OS=Homo sapiens GN=BRPF1 PE=1 SV=2	34.12	infected_2
Q5HY64	Putative protein FAM47C OS=Homo sapiens GN=FAM47C PE=2 SV=1	45.16	infected_2
P13647	Keratin, type II cytoskeletal 5 OS=Homo sapiens GN=KRT5 PE=1 SV=3	52.12	infected_2
Q9HBT8	Zinc finger protein 286A OS=Homo sapiens GN=ZNF286A PE=1 SV=1	313.44	infected_2
Q8N7P7	Uncharacterized protein FLJ40521 OS=Homo sapiens PE=2 SV=1	131.15	infected_2
O75534	Cold shock domain-containing protein E1 OS=Homo sapiens GN=CSDE1 PE=1 SV=2	65.85	infected_2
O75530	Polycomb protein EED OS=Homo sapiens GN=EED PE=1 SV=2	445.02	infected_2
Q99807	5-demethoxyubiquinone hydroxylase, mitochondrial OS=Homo sapiens GN=COQ7 PE=1 SV=3	50.07	infected_2
Q8NAC3	Interleukin-17 receptor C OS=Homo sapiens GN=IL17RC PE=1 SV=2	94.19	infected_2
P48751	Anion exchange protein 3 OS=Homo sapiens GN=SLC4A3 PE=2 SV=2	115.4	infected_2
Q8IYB7	DIS3-like exonuclease 2 OS=Homo sapiens GN=DIS3L2 PE=1 SV=4	33.69	infected_2
Q96E39	RNA binding motif protein, X-linked-like-1 OS=Homo sapiens GN=RBMXL1 PE=1 SV=1	153.09	infected_2
Q96GX9	Methylthioribulose-1-phosphate dehydratase OS=Homo sapiens GN=APIP PE=1 SV=1	277.9	infected_2
Q96NE9	FERM domain-containing protein 6 OS=Homo sapiens GN=FRMD6 PE=1 SV=1	61.96	infected_2
O75526	RNA-binding motif protein, X-linked-like-2 OS=Homo sapiens GN=RBMXL2 PE=1 SV=3	210.42	infected_2
Q6EMB2	Tubulin polyglutamylase TTLL5 OS=Homo sapiens GN=TTLL5 PE=1 SV=3	101.25	infected_2
Q8WVN8	Ubiquitin-conjugating enzyme E2 Q2 OS=Homo sapiens GN=UBE2Q2 PE=1 SV=1	91.58	infected_2
P31948	Stress-induced-phosphoprotein 1 OS=Homo sapiens GN=STIP1 PE=1 SV=1	42.67	infected_2
P48740	Mannan-binding lectin serine protease 1 OS=Homo sapiens GN=MASP1 PE=1 SV=3	217.77	infected_2
Q8IYA2	Putative coiled-coil domain-containing protein 144C OS=Homo sapiens GN=CCDC144CP PE=5 SV=3	85.94	infected_2
Q3B820	Protein FAM161A OS=Homo sapiens GN=FAM161A PE=1 SV=2	89.65	infected_2
P01024	Complement C3 OS=Homo sapiens GN=C3 PE=1 SV=2	41.39	infected_2
P17097	Zinc finger protein 7 OS=Homo sapiens GN=ZNF7 PE=1 SV=1	55.13	infected_2
Q8NAA4	Autophagy-related protein 16-2 OS=Homo sapiens GN=ATG16L2 PE=1 SV=2	50.85	infected_2
Q5T4D3	Transmembrane and TPR repeat-containing protein 4 OS=Homo sapiens GN=TMTC4 PE=2 SV=2	18.34	infected_2
P29323	Ephrin type-B receptor 2 OS=Homo sapiens GN=EPHB2 PE=1 SV=5	47.07	infected_2
P29320	Ephrin type-A receptor 3 OS=Homo sapiens GN=EPHA3 PE=1 SV=2	29.71	infected_2
P21860	Receptor tyrosine-protein kinase erbB-3 OS=Homo sapiens GN=ERBB3 PE=1 SV=1	51.58	infected_2
Q9Y6A5	Transforming acidic coiled-coil-containing protein 3 OS=Homo sapiens GN=TACC3 PE=1 SV=1	149.94	infected_2
A8K2U0	Alpha-2-macroglobulin-like protein 1 OS=Homo sapiens GN=A2ML1 PE=1 SV=3	159.24	infected_2
P51178	1-phosphatidylinositol 4,5-bisphosphate phosphodiesterase delta-1 OS=Homo sapiens GN=PLCD1 PE=1 SV=2	32.26	infected_2
Q9NQZ3	Deleted in azoospermia protein 1 OS=Homo sapiens GN=DAZ1 PE=1 SV=2	29.77	infected_2
Q9HC10	Otoferlin OS=Homo sapiens GN=OTOF PE=1 SV=3	66.22	infected_2
P51172	Amiloride-sensitive sodium channel subunit delta OS=Homo sapiens GN=SCNN1D PE=1 SV=2	0.97	infected_2
Q9NXG0	Centlein OS=Homo sapiens GN=CNTLN PE=1 SV=5	127.84	infected_2
Q53GT1	Kelch-like protein 22 OS=Homo sapiens GN=KLHL22 PE=1 SV=2	55.28	infected_2
P47989	Xanthine dehydrogenase/oxidase OS=Homo sapiens GN=XDH PE=1 SV=4	39.38	infected_2
Q2TAL6	Brorin OS=Homo sapiens GN=VWC2 PE=2 SV=1	24.35	infected_2
Q5RHP9	Glutamate-rich protein 3 OS=Homo sapiens GN=ERICH3 PE=2 SV=1	136.86	infected_2
Q9H2P0	Activity-dependent neuroprotector homeobox protein OS=Homo sapiens GN=ADNP PE=1 SV=1	30.61	infected_2
O14529	Homeobox protein cut-like 2 OS=Homo sapiens GN=CUX2 PE=1 SV=4	75.31	infected_2
Q9NXF8	Palmitoyltransferase ZDHHC7 OS=Homo sapiens GN=ZDHHC7 PE=1 SV=2	70.18	infected_2
E7EW31	Proline-rich basic protein 1 OS=Homo sapiens GN=PROB1 PE=2 SV=2	73.63	infected_2
Q9H307	Pinin OS=Homo sapiens GN=PNN PE=1 SV=4	116.01	infected_2
Q96DM1	PiggyBac transposable element-derived protein 4 OS=Homo sapiens GN=PGBD4 PE=2 SV=3	86.05	infected_2
P46527	Cyclin-dependent kinase inhibitor 1B OS=Homo sapiens GN=CDKN1B PE=1 SV=1	72.93	infected_2
Q9UBC9	Small proline-rich protein 3 OS=Homo sapiens GN=SPRR3 PE=1 SV=2	63.42	infected_2
Q9NQX4	Unconventional myosin-Vc OS=Homo sapiens GN=MYO5C PE=1 SV=2	43.19	infected_2
Q9UBC5	Unconventional myosin-Ia OS=Homo sapiens GN=MYO1A PE=1 SV=1	43.6	infected_2
Q9UL63	Muskelin OS=Homo sapiens GN=MKLN1 PE=1 SV=2	30.53	infected_2
Q9Y2W1	Thyroid hormone receptor-associated protein 3 OS=Homo sapiens GN=THRAP3 PE=1 SV=2	135.62	infected_2
Q15398	Disks large-associated protein 5 OS=Homo sapiens GN=DLGAP5 PE=1 SV=2	143.28	infected_2
A9Z1Z3	Fer-1-like protein 4 OS=Homo sapiens GN=FER1L4 PE=2 SV=1	43.43	infected_2
P20742	Pregnancy zone protein OS=Homo sapiens GN=PZP PE=1 SV=4	38.68	infected_2
Q8N4C6	Ninein OS=Homo sapiens GN=NIN PE=1 SV=4	138.66	infected_2
Q96QE3	ATPase family AAA domain-containing protein 5 OS=Homo sapiens GN=ATAD5 PE=1 SV=4	36.57	infected_2
Q9HBM0	Vezatin OS=Homo sapiens GN=VEZT PE=1 SV=3	122.07	infected_2
Q2NKQ1	Small G protein signaling modulator 1 OS=Homo sapiens GN=SGSM1 PE=1 SV=2	120.21	infected_2
Q9NXD2	Myotubularin-related protein 10 OS=Homo sapiens GN=MTMR10 PE=1 SV=3	45.44	infected_2
P54762	Ephrin type-B receptor 1 OS=Homo sapiens GN=EPHB1 PE=1 SV=1	111.77	infected_2
Q9UL51	Potassium/sodium hyperpolarization-activated cyclic nucleotide-gated channel 2 OS=Homo sapiens GN=HCN2 PE=1 SV=3	46.65	infected_2
Q8NDB2	B-cell scaffold protein with ankyrin repeats OS=Homo sapiens GN=BANK1 PE=1 SV=3	27.37	infected_2
Q5CZA5	Zinc finger protein 805 OS=Homo sapiens GN=ZNF805 PE=2 SV=3	101.33	infected_2
Q63HM1	Kynurenine formamidase OS=Homo sapiens GN=AFMID PE=2 SV=2	50.58	infected_2
Q9NQV7	Histone-lysine N-methyltransferase PRDM9 OS=Homo sapiens GN=PRDM9 PE=1 SV=2	7.58	infected_2
P54756	Ephrin type-A receptor 5 OS=Homo sapiens GN=EPHA5 PE=1 SV=3	122.69	infected_2
P17036	Zinc finger protein 3 OS=Homo sapiens GN=ZNF3 PE=1 SV=3	14.14	infected_2
Q8NDA8	Maestro heat-like repeat-containing protein family member 1 OS=Homo sapiens GN=MROH1 PE=2 SV=3	51.84	infected_2
Q6P4F7	Rho GTPase-activating protein 11A OS=Homo sapiens GN=ARHGAP11A PE=1 SV=2	113.07	infected_2
P78352	Disks large homolog 4 OS=Homo sapiens GN=DLG4 PE=1 SV=3	31.76	infected_2
Q2WGJ9	Fer-1-like protein 6 OS=Homo sapiens GN=FER1L6 PE=2 SV=2	44.55	infected_2
Q15375	Ephrin type-A receptor 7 OS=Homo sapiens GN=EPHA7 PE=1 SV=3	170.93	infected_2
Q70Z35	Phosphatidylinositol 3,4,5-trisphosphate-dependent Rac exchanger 2 protein OS=Homo sapiens GN=PREX2 PE=2 SV=1	63.93	infected_2
Q6IQ55	Tau-tubulin kinase 2 OS=Homo sapiens GN=TTBK2 PE=1 SV=2	61.31	infected_2
Q08209	Serine/threonine-protein phosphatase 2B catalytic subunit alpha isoform OS=Homo sapiens GN=PPP3CA PE=1 SV=1	68.06	infected_2
P43235	Cathepsin K OS=Homo sapiens GN=CTSK PE=1 SV=1	38.32	infected_2
P26006	Integrin alpha-3 OS=Homo sapiens GN=ITGA3 PE=1 SV=5	107.18	infected_2
P43234	Cathepsin O OS=Homo sapiens GN=CTSO PE=2 SV=1	132.28	infected_2
O14841	5-oxoprolinase OS=Homo sapiens GN=OPLAH PE=1 SV=3	101.94	infected_2
Q6MZZ7	Calpain-13 OS=Homo sapiens GN=CAPN13 PE=1 SV=2	102.47	infected_2
P17020	Zinc finger protein 16 OS=Homo sapiens GN=ZNF16 PE=1 SV=3	109.67	infected_2
Q8IUR6	CREB3 regulatory factor OS=Homo sapiens GN=CREBRF PE=1 SV=2	101.78	infected_2
P16298	Serine/threonine-protein phosphatase 2B catalytic subunit beta isoform OS=Homo sapiens GN=PPP3CB PE=1 SV=2	21.83	infected_2
O95057	GTP-binding protein Di-Ras1 OS=Homo sapiens GN=DIRAS1 PE=1 SV=1	50.03	infected_2
Q8IY92	Structure-specific endonuclease subunit SLX4 OS=Homo sapiens GN=SLX4 PE=1 SV=3	61.07	infected_2
Q9NQT8	Kinesin-like protein KIF13B OS=Homo sapiens GN=KIF13B PE=1 SV=2	87.26	infected_2
P26358	DNA (cytosine-5)-methyltransferase 1 OS=Homo sapiens GN=DNMT1 PE=1 SV=2	111.78	infected_2
Q08554	Desmocollin-1 OS=Homo sapiens GN=DSC1 PE=1 SV=2	178.65	infected_2
P04920	Anion exchange protein 2 OS=Homo sapiens GN=SLC4A2 PE=1 SV=4	101.07	infected_2
Q9UKQ2	Disintegrin and metalloproteinase domain-containing protein 28 OS=Homo sapiens GN=ADAM28 PE=2 SV=3	55.95	infected_2
Q9Y5Y0	Feline leukemia virus subgroup C receptor-related protein 1 OS=Homo sapiens GN=FLVCR1 PE=1 SV=1	91.37	infected_2
Q5T7B8	Kinesin-like protein KIF24 OS=Homo sapiens GN=KIF24 PE=1 SV=2	111.23	infected_2
Q86YW9	Mediator of RNA polymerase II transcription subunit 12-like protein OS=Homo sapiens GN=MED12L PE=1 SV=2	17.62	infected_2
Q8IY84	Serine/threonine-protein kinase NIM1 OS=Homo sapiens GN=NIM1K PE=1 SV=1	19.44	infected_2
Q3T906	N-acetylglucosamine-1-phosphotransferase subunits alpha/beta OS=Homo sapiens GN=GNPTAB PE=1 SV=1	31.16	infected_2
Q68D10	Protein SPT2 homolog OS=Homo sapiens GN=SPTY2D1 PE=1 SV=3	42.44	infected_2
Q9NQS7	Inner centromere protein OS=Homo sapiens GN=INCENP PE=1 SV=3	168.35	infected_2
Q9Y334	von Willebrand factor A domain-containing protein 7 OS=Homo sapiens GN=VWA7 PE=2 SV=4	87.9	infected_2
Q9UL12	Sarcosine dehydrogenase, mitochondrial OS=Homo sapiens GN=SARDH PE=1 SV=1	25.3	infected_2
Q9P0K7	Ankycorbin OS=Homo sapiens GN=RAI14 PE=1 SV=2	143.62	infected_2
P16278	Beta-galactosidase OS=Homo sapiens GN=GLB1 PE=1 SV=2	17.88	infected_2
Q2UY09	Collagen alpha-1(XXVIII) chain OS=Homo sapiens GN=COL28A1 PE=2 SV=2	44.41	infected_2
O95397	Putative protein PLEKHA9 OS=Homo sapiens GN=PLEKHA8P1 PE=5 SV=1	92.41	infected_2
O95394	Phosphoacetylglucosamine mutase OS=Homo sapiens GN=PGM3 PE=1 SV=1	156.74	infected_2
Q8N184	Zinc finger protein 567 OS=Homo sapiens GN=ZNF567 PE=1 SV=3	9.47	infected_2
Q6TDU7	Protein CASC1 OS=Homo sapiens GN=CASC1 PE=2 SV=2	81.51	infected_2
Q5VV63	Attractin-like protein 1 OS=Homo sapiens GN=ATRNL1 PE=2 SV=2	71.05	infected_2
Q9NTW7	Zinc finger protein 64 homolog, isoforms 3 and 4 OS=Homo sapiens GN=ZFP64 PE=1 SV=3	66.44	infected_2
Q14241	Transcription elongation factor B polypeptide 3 OS=Homo sapiens GN=TCEB3 PE=1 SV=2	75.64	infected_2
Q8WVB6	Chromosome transmission fidelity protein 18 homolog OS=Homo sapiens GN=CHTF18 PE=1 SV=1	43.99	infected_2
Q6ZN30	Zinc finger protein basonuclin-2 OS=Homo sapiens GN=BNC2 PE=1 SV=1	45.2	infected_2
Q15329	Transcription factor E2F5 OS=Homo sapiens GN=E2F5 PE=1 SV=1	223.9	infected_2
Q6JQN1	Acyl-CoA dehydrogenase family member 10 OS=Homo sapiens GN=ACAD10 PE=1 SV=1	34.65	infected_2
Q5SYE7	NHS-like protein 1 OS=Homo sapiens GN=NHSL1 PE=1 SV=2	266.97	infected_2
Q8IXT2	Doublesex- and mab-3-related transcription factor C2 OS=Homo sapiens GN=DMRTC2 PE=2 SV=2	406.43	infected_2
O43390	Heterogeneous nuclear ribonucleoprotein R OS=Homo sapiens GN=HNRNPR PE=1 SV=1	92.78	infected_2
Q96K21	Abscission/NoCut checkpoint regulator OS=Homo sapiens GN=ZFYVE19 PE=1 SV=3	159.91	infected_2
Q8N163	Cell cycle and apoptosis regulator protein 2 OS=Homo sapiens GN=CCAR2 PE=1 SV=2	13.83	infected_2
Q9Y666	Solute carrier family 12 member 7 OS=Homo sapiens GN=SLC12A7 PE=1 SV=3	121.79	infected_2
P0C0L5	Complement C4-B OS=Homo sapiens GN=C4B PE=1 SV=2	62.26	infected_2
P0C0L4	Complement C4-A OS=Homo sapiens GN=C4A PE=1 SV=2	75.64	infected_2
Q15678	Tyrosine-protein phosphatase non-receptor type 14 OS=Homo sapiens GN=PTPN14 PE=1 SV=2	102.62	infected_2
Q5VV42	Threonylcarbamoyladenosine tRNA methylthiotransferase OS=Homo sapiens GN=CDKAL1 PE=1 SV=1	30.22	infected_2
Q7LDG7	RAS guanyl-releasing protein 2 OS=Homo sapiens GN=RASGRP2 PE=1 SV=1	3.83	infected_2
A2VDJ0	Transmembrane protein 131-like OS=Homo sapiens GN=KIAA0922 PE=1 SV=2	52.87	infected_2
Q86SG3	Deleted in azoospermia protein 4 OS=Homo sapiens GN=DAZ4 PE=1 SV=2	29.77	infected_2
P51788	Chloride channel protein 2 OS=Homo sapiens GN=CLCN2 PE=1 SV=2	13.92	infected_2
Q6ZN17	Protein lin-28 homolog B OS=Homo sapiens GN=LIN28B PE=1 SV=1	432.95	infected_2
P51787	Potassium voltage-gated channel subfamily KQT member 1 OS=Homo sapiens GN=KCNQ1 PE=1 SV=3	167.39	infected_2
O00370	LINE-1 retrotransposable element ORF2 protein OS=Homo sapiens PE=1 SV=1	32.33	infected_2
Q9UKL4	Gap junction delta-2 protein OS=Homo sapiens GN=GJD2 PE=1 SV=1	561.23	infected_2
Q08AH1	Acyl-coenzyme A synthetase ACSM1, mitochondrial OS=Homo sapiens GN=ACSM1 PE=1 SV=1	55.25	infected_2
Q8IXR9	Uncharacterized protein C12orf56 OS=Homo sapiens GN=C12orf56 PE=2 SV=3	50.86	infected_2
O60242	Adhesion G protein-coupled receptor B3 OS=Homo sapiens GN=ADGRB3 PE=1 SV=2	42.77	infected_2
Q92766	Ras-responsive element-binding protein 1 OS=Homo sapiens GN=RREB1 PE=1 SV=3	42.09	infected_2
Q9UKK3	Poly [ADP-ribose] polymerase 4 OS=Homo sapiens GN=PARP4 PE=1 SV=3	90.64	infected_2
Q7KYR7	Butyrophilin subfamily 2 member A1 OS=Homo sapiens GN=BTN2A1 PE=1 SV=3	77.39	infected_2
Q5TZA2	Rootletin OS=Homo sapiens GN=CROCC PE=1 SV=1	93.56	infected_2
Q8NCX0	Coiled-coil domain-containing protein 150 OS=Homo sapiens GN=CCDC150 PE=1 SV=2	73.37	infected_2
Q15650	Activating signal cointegrator 1 OS=Homo sapiens GN=TRIP4 PE=1 SV=4	43.08	infected_2
Q8IY21	Probable ATP-dependent RNA helicase DDX60 OS=Homo sapiens GN=DDX60 PE=1 SV=3	98.9	infected_2
Q86Z20	Coiled-coil domain-containing protein 125 OS=Homo sapiens GN=CCDC125 PE=1 SV=2	11.26	infected_2
Q8N3X6	Ligand-dependent nuclear receptor corepressor-like protein OS=Homo sapiens GN=LCORL PE=1 SV=4	45.21	infected_2
A6NG13	Alpha-1,3-mannosyl-glycoprotein 4-beta-N-acetylglucosaminyltransferase-like protein MGAT4D OS=Homo sapiens GN=MGAT4D PE=2 SV=3	29.83	infected_2
Q9UKJ3	G patch domain-containing protein 8 OS=Homo sapiens GN=GPATCH8 PE=1 SV=2	138.54	infected_2
P17661	Desmin OS=Homo sapiens GN=DES PE=1 SV=3	201.6	infected_2
Q5T0N1	Cilia- and flagella-associated protein 70 OS=Homo sapiens GN=CFAP70 PE=2 SV=3	51.75	infected_2
Q15643	Thyroid receptor-interacting protein 11 OS=Homo sapiens GN=TRIP11 PE=1 SV=3	135.11	infected_2
P07237	Protein disulfide-isomerase OS=Homo sapiens GN=P4HB PE=1 SV=3	54.8	infected_2
Q9GZU2	Paternally-expressed gene 3 protein OS=Homo sapiens GN=PEG3 PE=1 SV=1	115.72	infected_2
Q96PY6	Serine/threonine-protein kinase Nek1 OS=Homo sapiens GN=NEK1 PE=1 SV=2	98.94	infected_2
Q9UHC9	Niemann-Pick C1-like protein 1 OS=Homo sapiens GN=NPC1L1 PE=1 SV=2	67.3	infected_2
P39086	Glutamate receptor ionotropic, kainate 1 OS=Homo sapiens GN=GRIK1 PE=1 SV=1	26.01	infected_2
Q86VI3	Ras GTPase-activating-like protein IQGAP3 OS=Homo sapiens GN=IQGAP3 PE=1 SV=2	175.33	infected_2
P19823	Inter-alpha-trypsin inhibitor heavy chain H2 OS=Homo sapiens GN=ITIH2 PE=1 SV=2	247.95	infected_2
Q96N38	Zinc finger protein 714 OS=Homo sapiens GN=ZNF714 PE=2 SV=3	18.74	infected_2
Q86Z02	Homeodomain-interacting protein kinase 1 OS=Homo sapiens GN=HIPK1 PE=1 SV=1	89.13	infected_2
P48058	Glutamate receptor 4 OS=Homo sapiens GN=GRIA4 PE=2 SV=2	56.94	infected_2
Q9Y5P8	Serine/threonine-protein phosphatase 2A regulatory subunit B'' subunit beta OS=Homo sapiens GN=PPP2R3B PE=1 SV=2	22.8	infected_2
Q7Z570	Zinc finger protein 804A OS=Homo sapiens GN=ZNF804A PE=1 SV=3	64.45	infected_2
Q5T6X5	G-protein coupled receptor family C group 6 member A OS=Homo sapiens GN=GPRC6A PE=1 SV=1	31.48	infected_2
Q86YN6	Peroxisome proliferator-activated receptor gamma coactivator 1-beta OS=Homo sapiens GN=PPARGC1B PE=1 SV=2	46.22	infected_2
Q92729	Receptor-type tyrosine-protein phosphatase U OS=Homo sapiens GN=PTPRU PE=1 SV=2	17.04	infected_2
P0CG33	Putative golgin subfamily A member 6D OS=Homo sapiens GN=GOLGA6D PE=5 SV=1	31.87	infected_2
Q96N20	Zinc finger protein 75A OS=Homo sapiens GN=ZNF75A PE=2 SV=1	64.84	infected_2
P40227	T-complex protein 1 subunit zeta OS=Homo sapiens GN=CCT6A PE=1 SV=3	93.18	infected_2
Q16706	Alpha-mannosidase 2 OS=Homo sapiens GN=MAN2A1 PE=1 SV=2	203.64	infected_2
Q13443	Disintegrin and metalloproteinase domain-containing protein 9 OS=Homo sapiens GN=ADAM9 PE=1 SV=1	155.1	infected_2
Q8NFZ0	F-box DNA helicase 1 OS=Homo sapiens GN=FBXO18 PE=1 SV=2	105.43	infected_2
O43683	Mitotic checkpoint serine/threonine-protein kinase BUB1 OS=Homo sapiens GN=BUB1 PE=1 SV=1	91.28	infected_2
Q14524	Sodium channel protein type 5 subunit alpha OS=Homo sapiens GN=SCN5A PE=1 SV=2	94.68	infected_2
O00311	Cell division cycle 7-related protein kinase OS=Homo sapiens GN=CDC7 PE=1 SV=1	24.98	infected_2
Q9NX61	Transmembrane protein 161A OS=Homo sapiens GN=TMEM161A PE=2 SV=1	61.98	infected_2
Q13435	Splicing factor 3B subunit 2 OS=Homo sapiens GN=SF3B2 PE=1 SV=2	4	infected_2
Q9Y2H2	Phosphatidylinositide phosphatase SAC2 OS=Homo sapiens GN=INPP5F PE=1 SV=3	187.99	infected_2
Q9UQR0	Sex comb on midleg-like protein 2 OS=Homo sapiens GN=SCML2 PE=1 SV=1	107.83	infected_2
P05026	Sodium/potassium-transporting ATPase subunit beta-1 OS=Homo sapiens GN=ATP1B1 PE=1 SV=1	15.3	infected_2
Q8IXL6	Extracellular serine/threonine protein kinase FAM20C OS=Homo sapiens GN=FAM20C PE=1 SV=2	83.89	infected_2
O43315	Aquaporin-9 OS=Homo sapiens GN=AQP9 PE=2 SV=2	368.65	infected_2
O15294	UDP-N-acetylglucosamine--peptide N-acetylglucosaminyltransferase 110 kDa subunit OS=Homo sapiens GN=OGT PE=1 SV=3	139.61	infected_2
Q14515	SPARC-like protein 1 OS=Homo sapiens GN=SPARCL1 PE=1 SV=2	39.92	infected_2
Q4VNC0	Probable cation-transporting ATPase 13A5 OS=Homo sapiens GN=ATP13A5 PE=2 SV=1	75.16	infected_2
Q9Y2G3	Probable phospholipid-transporting ATPase IF OS=Homo sapiens GN=ATP11B PE=1 SV=2	25.63	infected_2
Q9Y2G2	Caspase recruitment domain-containing protein 8 OS=Homo sapiens GN=CARD8 PE=1 SV=1	14.5	infected_2
Q9BRQ0	Pygopus homolog 2 OS=Homo sapiens GN=PYGO2 PE=1 SV=2	61.54	infected_2
O75159	Suppressor of cytokine signaling 5 OS=Homo sapiens GN=SOCS5 PE=1 SV=1	89.47	infected_2
Q6ICL7	Solute carrier family 35 member E4 OS=Homo sapiens GN=SLC35E4 PE=2 SV=1	125.82	infected_2
Q9C0J8	pre-mRNA 3' end processing protein WDR33 OS=Homo sapiens GN=WDR33 PE=1 SV=2	77.94	infected_2
Q5VUJ6	Leucine-rich repeat and calponin homology domain-containing protein 2 OS=Homo sapiens GN=LRCH2 PE=2 SV=2	141.98	infected_2
Q8IXJ9	Putative Polycomb group protein ASXL1 OS=Homo sapiens GN=ASXL1 PE=1 SV=3	33.96	infected_2
Q6P3V2	Zinc finger protein 585A OS=Homo sapiens GN=ZNF585A PE=2 SV=2	42.02	infected_2
Q8IUD2	ELKS/Rab6-interacting/CAST family member 1 OS=Homo sapiens GN=ERC1 PE=1 SV=1	24.62	infected_2
O60522	Tudor domain-containing protein 6 OS=Homo sapiens GN=TDRD6 PE=2 SV=2	39.09	infected_2
P08620	Fibroblast growth factor 4 OS=Homo sapiens GN=FGF4 PE=1 SV=1	98.77	infected_2
Q6PD62	RNA polymerase-associated protein CTR9 homolog OS=Homo sapiens GN=CTR9 PE=1 SV=1	51.36	infected_2
O95995	Growth arrest-specific protein 8 OS=Homo sapiens GN=GAS8 PE=1 SV=1	26.39	infected_2
Q05519	Serine/arginine-rich splicing factor 11 OS=Homo sapiens GN=SRSF11 PE=1 SV=1	6.16	infected_2
P23677	Inositol-trisphosphate 3-kinase A OS=Homo sapiens GN=ITPKA PE=1 SV=1	35.39	infected_2
A6NM62	Leucine-rich repeat-containing protein 53 OS=Homo sapiens GN=LRRC53 PE=4 SV=2	115.43	infected_2
P59510	A disintegrin and metalloproteinase with thrombospondin motifs 20 OS=Homo sapiens GN=ADAMTS20 PE=2 SV=2	59.4	infected_2
Q01167	Forkhead box protein K2 OS=Homo sapiens GN=FOXK2 PE=1 SV=3	13.82	infected_2
P22223	Cadherin-3 OS=Homo sapiens GN=CDH3 PE=1 SV=2	65.8	infected_2
Q6PCT2	F-box/LRR-repeat protein 19 OS=Homo sapiens GN=FBXL19 PE=1 SV=3	61.66	infected_2
O95625	Zinc finger and BTB domain-containing protein 11 OS=Homo sapiens GN=ZBTB11 PE=1 SV=2	25.22	infected_2
P35908	Keratin, type II cytoskeletal 2 epidermal OS=Homo sapiens GN=KRT2 PE=1 SV=2	167.82	infected_2
Q9HAZ2	PR domain zinc finger protein 16 OS=Homo sapiens GN=PRDM16 PE=1 SV=3	44.11	infected_2
Q32MZ4	Leucine-rich repeat flightless-interacting protein 1 OS=Homo sapiens GN=LRRFIP1 PE=1 SV=2	114.91	infected_2
O75132	Zinc finger BED domain-containing protein 4 OS=Homo sapiens GN=ZBED4 PE=1 SV=2	56.61	infected_2
Q9NWQ4	G patch domain-containing protein 2-like OS=Homo sapiens GN=GPATCH2L PE=1 SV=3	22.73	infected_2
P26927	Hepatocyte growth factor-like protein OS=Homo sapiens GN=MST1 PE=1 SV=2	48.42	infected_2
Q8TBZ0	Coiled-coil domain-containing protein 110 OS=Homo sapiens GN=CCDC110 PE=1 SV=1	27.29	infected_2
O94892	Zinc finger protein 432 OS=Homo sapiens GN=ZNF432 PE=1 SV=1	40.99	infected_2
Q5TYW1	Zinc finger protein 658 OS=Homo sapiens GN=ZNF658 PE=2 SV=2	62.36	infected_2
P42704	Leucine-rich PPR motif-containing protein, mitochondrial OS=Homo sapiens GN=LRPPRC PE=1 SV=3	72.03	infected_2
Q9C0H2	Protein tweety homolog 3 OS=Homo sapiens GN=TTYH3 PE=1 SV=3	61.89	infected_2
Q86VB7	Scavenger receptor cysteine-rich type 1 protein M130 OS=Homo sapiens GN=CD163 PE=1 SV=2	184.13	infected_2
Q96PQ0	VPS10 domain-containing receptor SorCS2 OS=Homo sapiens GN=SORCS2 PE=1 SV=3	48.19	infected_2
Q9NZV7	Zinc finger imprinted 2 OS=Homo sapiens GN=ZIM2 PE=2 SV=1	106.19	infected_2
O94880	PHD finger protein 14 OS=Homo sapiens GN=PHF14 PE=1 SV=2	82.47	infected_2
Q13740	CD166 antigen OS=Homo sapiens GN=ALCAM PE=1 SV=2	10.29	infected_2
Q5VUG0	Scm-like with four MBT domains protein 2 OS=Homo sapiens GN=SFMBT2 PE=1 SV=1	58.19	infected_2
Q96CW5	Gamma-tubulin complex component 3 OS=Homo sapiens GN=TUBGCP3 PE=1 SV=2	76.87	infected_2
O95602	DNA-directed RNA polymerase I subunit RPA1 OS=Homo sapiens GN=POLR1A PE=1 SV=2	55.66	infected_2
Q96PP4	Testis-specific gene 13 protein OS=Homo sapiens GN=TSGA13 PE=2 SV=1	398.8	infected_2
O75475	PC4 and SFRS1-interacting protein OS=Homo sapiens GN=PSIP1 PE=1 SV=1	36.38	infected_2
Q7Z4N2	Transient receptor potential cation channel subfamily M member 1 OS=Homo sapiens GN=TRPM1 PE=1 SV=2	37.62	infected_2
Q9NX02	NACHT, LRR and PYD domains-containing protein 2 OS=Homo sapiens GN=NLRP2 PE=1 SV=1	133.62	infected_2
Q9Y5H6	Protocadherin alpha-8 OS=Homo sapiens GN=PCDHA8 PE=2 SV=1	45.53	infected_2
Q9Y5H5	Protocadherin alpha-9 OS=Homo sapiens GN=PCDHA9 PE=2 SV=1	69.17	infected_2
Q8WV44	E3 ubiquitin-protein ligase TRIM41 OS=Homo sapiens GN=TRIM41 PE=1 SV=3	84.28	infected_2
Q99742	Neuronal PAS domain-containing protein 1 OS=Homo sapiens GN=NPAS1 PE=2 SV=2	97.91	infected_2
Q9C0F0	Putative Polycomb group protein ASXL3 OS=Homo sapiens GN=ASXL3 PE=2 SV=3	61.25	infected_2
Q9H8E8	Cysteine-rich protein 2-binding protein OS=Homo sapiens GN=CSRP2BP PE=1 SV=3	8.05	infected_2
Q9BXX2	Ankyrin repeat domain-containing protein 30B OS=Homo sapiens GN=ANKRD30B PE=2 SV=3	77.75	infected_2
Q96T68	Histone-lysine N-methyltransferase SETDB2 OS=Homo sapiens GN=SETDB2 PE=1 SV=2	169.18	infected_2
Q96Q04	Serine/threonine-protein kinase LMTK3 OS=Homo sapiens GN=LMTK3 PE=1 SV=2	138.45	infected_2
Q8TC84	Fibronectin type 3 and ankyrin repeat domains protein 1 OS=Homo sapiens GN=FANK1 PE=2 SV=3	147.89	infected_2
Q3V6T2	Girdin OS=Homo sapiens GN=CCDC88A PE=1 SV=2	75.33	infected_2
P37173	TGF-beta receptor type-2 OS=Homo sapiens GN=TGFBR2 PE=1 SV=2	84.01	infected_2
Q9NWN3	F-box only protein 34 OS=Homo sapiens GN=FBXO34 PE=1 SV=2	2.54	infected_2
P23634	Plasma membrane calcium-transporting ATPase 4 OS=Homo sapiens GN=ATP2B4 PE=1 SV=2	52.58	infected_2
Q9Y5G1	Protocadherin gamma-B3 OS=Homo sapiens GN=PCDHGB3 PE=2 SV=3	98.12	infected_2
Q9Y5G0	Protocadherin gamma-B5 OS=Homo sapiens GN=PCDHGB5 PE=2 SV=1	20.95	infected_2
Q12996	Cleavage stimulation factor subunit 3 OS=Homo sapiens GN=CSTF3 PE=1 SV=1	80.26	infected_2
Q96MH7	Uncharacterized protein C5orf34 OS=Homo sapiens GN=C5orf34 PE=2 SV=2	41.85	infected_2
Q5TCH4	Cytochrome P450 4A22 OS=Homo sapiens GN=CYP4A22 PE=1 SV=1	113.41	infected_2
Q96PN6	Adenylate cyclase type 10 OS=Homo sapiens GN=ADCY10 PE=1 SV=3	38.52	infected_2
Q96ST8	Centrosomal protein of 89 kDa OS=Homo sapiens GN=CEP89 PE=1 SV=3	62.23	infected_2
O14493	Claudin-4 OS=Homo sapiens GN=CLDN4 PE=1 SV=1	110.61	infected_2
Q6RI45	Bromodomain and WD repeat-containing protein 3 OS=Homo sapiens GN=BRWD3 PE=1 SV=2	79.33	infected_2
Q96ST2	Protein IWS1 homolog OS=Homo sapiens GN=IWS1 PE=1 SV=2	114.93	infected_2
Q05823	2-5A-dependent ribonuclease OS=Homo sapiens GN=RNASEL PE=1 SV=2	76.78	infected_2
Q01118	Sodium channel protein type 7 subunit alpha OS=Homo sapiens GN=SCN7A PE=1 SV=2	92.58	infected_2
P11387	DNA topoisomerase 1 OS=Homo sapiens GN=TOP1 PE=1 SV=2	34.71	infected_2
P05305	Endothelin-1 OS=Homo sapiens GN=EDN1 PE=1 SV=1	158.44	infected_2
A8MT70	Zinc finger B-box domain-containing protein 1 OS=Homo sapiens GN=ZBBX PE=2 SV=3	49.77	infected_2
P49753	Acyl-coenzyme A thioesterase 2, mitochondrial OS=Homo sapiens GN=ACOT2 PE=1 SV=6	16.95	infected_2
Q9HAU5	Regulator of nonsense transcripts 2 OS=Homo sapiens GN=UPF2 PE=1 SV=1	125.9	infected_2
Q7Z4K8	Tripartite motif-containing protein 46 OS=Homo sapiens GN=TRIM46 PE=2 SV=2	73.01	infected_2
P12109	Collagen alpha-1(VI) chain OS=Homo sapiens GN=COL6A1 PE=1 SV=3	127.94	infected_2
P12107	Collagen alpha-1(XI) chain OS=Homo sapiens GN=COL11A1 PE=1 SV=4	74.98	infected_2
P48668	Keratin, type II cytoskeletal 6C OS=Homo sapiens GN=KRT6C PE=1 SV=3	13.89	infected_2
Q14DG7	Transmembrane protein 132B OS=Homo sapiens GN=TMEM132B PE=2 SV=2	123.24	infected_2
Q04726	Transducin-like enhancer protein 3 OS=Homo sapiens GN=TLE3 PE=1 SV=2	0.68	infected_2
Q9BXU7	Ubiquitin carboxyl-terminal hydrolase 26 OS=Homo sapiens GN=USP26 PE=1 SV=1	71.59	infected_2
O60813	PRAME family member 11 OS=Homo sapiens GN=PRAMEF11 PE=2 SV=3	43.7	infected_2
A4D1E1	Zinc finger protein 804B OS=Homo sapiens GN=ZNF804B PE=2 SV=2	100.92	infected_2
Q96CS4	Zinc finger protein 689 OS=Homo sapiens GN=ZNF689 PE=2 SV=1	167.85	infected_2
O60810	PRAME family member 4 OS=Homo sapiens GN=PRAMEF4 PE=2 SV=4	43.7	infected_2
O95922	Probable tubulin polyglutamylase TTLL1 OS=Homo sapiens GN=TTLL1 PE=2 SV=1	36.32	infected_2
Q8N9V7	Testis- and ovary-specific PAZ domain-containing protein 1 OS=Homo sapiens GN=TOPAZ1 PE=2 SV=3	50.58	infected_2
P14625	Endoplasmin OS=Homo sapiens GN=HSP90B1 PE=1 SV=1	184.01	infected_2
Q5VXH4	PRAME family member 6 OS=Homo sapiens GN=PRAMEF6 PE=2 SV=1	114	infected_2
Q9BXT6	Putative helicase Mov10l1 OS=Homo sapiens GN=MOV10L1 PE=2 SV=1	48.11	infected_2
Q66K14	TBC1 domain family member 9B OS=Homo sapiens GN=TBC1D9B PE=1 SV=3	174.78	infected_2
Q9H4Z3	Phosphorylated CTD-interacting factor 1 OS=Homo sapiens GN=PCIF1 PE=1 SV=1	58.27	infected_2
O94822	E3 ubiquitin-protein ligase listerin OS=Homo sapiens GN=LTN1 PE=1 SV=6	69.14	infected_2
Q5SRE5	Nucleoporin NUP188 homolog OS=Homo sapiens GN=NUP188 PE=1 SV=1	111.62	infected_2
P0DJJ0	SLIT-ROBO Rho GTPase-activating protein 2C OS=Homo sapiens GN=SRGAP2C PE=1 SV=1	23.96	infected_2
P0DMP2	SLIT-ROBO Rho GTPase-activating protein 2B OS=Homo sapiens GN=SRGAP2B PE=3 SV=1	9.05	infected_2
P29597	Non-receptor tyrosine-protein kinase TYK2 OS=Homo sapiens GN=TYK2 PE=1 SV=3	82.62	infected_2
Q8NFM7	Interleukin-17 receptor D OS=Homo sapiens GN=IL17RD PE=1 SV=3	149.47	infected_2
O94813	Slit homolog 2 protein OS=Homo sapiens GN=SLIT2 PE=1 SV=1	62.28	infected_2
Q8NFM4	Adenylate cyclase type 4 OS=Homo sapiens GN=ADCY4 PE=1 SV=1	73.38	infected_2
Q01433	AMP deaminase 2 OS=Homo sapiens GN=AMPD2 PE=1 SV=2	64.2	infected_2
A8MW92	PHD finger protein 20-like protein 1 OS=Homo sapiens GN=PHF20L1 PE=1 SV=2	68.25	infected_2
Q8TC29	Enkurin OS=Homo sapiens GN=ENKUR PE=2 SV=1	20.57	infected_2
A6NC98	Coiled-coil domain-containing protein 88B OS=Homo sapiens GN=CCDC88B PE=1 SV=1	178.65	infected_2
Q8TEW0	Partitioning defective 3 homolog OS=Homo sapiens GN=PARD3 PE=1 SV=2	133.35	infected_2
Q9H583	HEAT repeat-containing protein 1 OS=Homo sapiens GN=HEATR1 PE=1 SV=3	87.7	infected_2
Q9NZM3	Intersectin-2 OS=Homo sapiens GN=ITSN2 PE=1 SV=3	154.11	infected_2
Q8WY21	VPS10 domain-containing receptor SorCS1 OS=Homo sapiens GN=SORCS1 PE=1 SV=3	107.12	infected_2
Q9UQD0	Sodium channel protein type 8 subunit alpha OS=Homo sapiens GN=SCN8A PE=1 SV=1	142.22	infected_2
P27037	Activin receptor type-2A OS=Homo sapiens GN=ACVR2A PE=1 SV=1	71.72	infected_2
Q9BRD0	BUD13 homolog OS=Homo sapiens GN=BUD13 PE=1 SV=1	30.21	infected_2
Q9NWF9	E3 ubiquitin-protein ligase RNF216 OS=Homo sapiens GN=RNF216 PE=1 SV=3	119.25	infected_2
O14786	Neuropilin-1 OS=Homo sapiens GN=NRP1 PE=1 SV=3	43.71	infected_2
O75747	Phosphatidylinositol 4-phosphate 3-kinase C2 domain-containing subunit gamma OS=Homo sapiens GN=PIK3C2G PE=1 SV=3	78.96	infected_2
P21741	Midkine OS=Homo sapiens GN=MDK PE=1 SV=1	217.16	infected_2
Q96G46	tRNA-dihydrouridine(47) synthase [NAD(P)(+)]-like OS=Homo sapiens GN=DUS3L PE=1 SV=2	73.82	infected_2
Q6WCQ1	Myosin phosphatase Rho-interacting protein OS=Homo sapiens GN=MPRIP PE=1 SV=3	156.09	infected_2
Q9BUH8	Brain-enriched guanylate kinase-associated protein OS=Homo sapiens GN=BEGAIN PE=1 SV=1	69.02	infected_2
Q86UU0	B-cell CLL/lymphoma 9-like protein OS=Homo sapiens GN=BCL9L PE=1 SV=1	40.66	infected_2
Q96SK3	Zinc finger protein 607 OS=Homo sapiens GN=ZNF607 PE=1 SV=3	98.18	infected_2
Q15283	Ras GTPase-activating protein 2 OS=Homo sapiens GN=RASA2 PE=1 SV=3	185	infected_2
P35251	Replication factor C subunit 1 OS=Homo sapiens GN=RFC1 PE=1 SV=4	73.26	infected_2
Q14191	Werner syndrome ATP-dependent helicase OS=Homo sapiens GN=WRN PE=1 SV=2	115.7	infected_2
Q14185	Dedicator of cytokinesis protein 1 OS=Homo sapiens GN=DOCK1 PE=1 SV=2	68.48	infected_2
Q8TEQ6	Gem-associated protein 5 OS=Homo sapiens GN=GEMIN5 PE=1 SV=3	91.74	infected_2
Q2KJY2	Kinesin-like protein KIF26B OS=Homo sapiens GN=KIF26B PE=2 SV=1	39.09	infected_2
Q8TEQ0	Sorting nexin-29 OS=Homo sapiens GN=SNX29 PE=1 SV=3	45.22	infected_2
Q70EL1	Inactive ubiquitin carboxyl-terminal hydrolase 54 OS=Homo sapiens GN=USP54 PE=1 SV=4	57.15	infected_2
Q9C099	Leucine-rich repeat and coiled-coil domain-containing protein 1 OS=Homo sapiens GN=LRRCC1 PE=1 SV=2	64.02	infected_2
Q7Z7G0	Target of Nesh-SH3 OS=Homo sapiens GN=ABI3BP PE=1 SV=1	114.2	infected_2
Q9C091	GREB1-like protein OS=Homo sapiens GN=GREB1L PE=2 SV=2	44.49	infected_2
Q9H1K4	Mitochondrial glutamate carrier 2 OS=Homo sapiens GN=SLC25A18 PE=1 SV=1	134.9	infected_2
Q96PB8	Leucine-rich repeat-containing protein 3B OS=Homo sapiens GN=LRRC3B PE=2 SV=1	21.6	infected_2
Q8TEP8	Centrosomal protein of 192 kDa OS=Homo sapiens GN=CEP192 PE=1 SV=2	85.97	infected_2
Q5QJ38	Trichohyalin-like protein 1 OS=Homo sapiens GN=TCHHL1 PE=2 SV=1	238.6	infected_2
Q70EK9	Ubiquitin carboxyl-terminal hydrolase 51 OS=Homo sapiens GN=USP51 PE=2 SV=1	84.85	infected_2
Q70EK8	Inactive ubiquitin carboxyl-terminal hydrolase 53 OS=Homo sapiens GN=USP53 PE=2 SV=2	131.16	infected_2
P35590	Tyrosine-protein kinase receptor Tie-1 OS=Homo sapiens GN=TIE1 PE=1 SV=1	168.49	infected_2
Q7Z7F0	UPF0469 protein KIAA0907 OS=Homo sapiens GN=KIAA0907 PE=1 SV=1	63.92	infected_2
Q14168	MAGUK p55 subfamily member 2 OS=Homo sapiens GN=MPP2 PE=1 SV=3	133.11	infected_2
Q14160	Protein scribble homolog OS=Homo sapiens GN=SCRIB PE=1 SV=4	149.97	infected_2
P15090	Fatty acid-binding protein, adipocyte OS=Homo sapiens GN=FABP4 PE=1 SV=3	442.59	infected_2
E9PAV3	Nascent polypeptide-associated complex subunit alpha, muscle-specific form OS=Homo sapiens GN=NACA PE=1 SV=1	58.8	infected_2
O96028	Histone-lysine N-methyltransferase NSD2 OS=Homo sapiens GN=WHSC1 PE=1 SV=1	78.33	infected_2
Q9UN74	Protocadherin alpha-4 OS=Homo sapiens GN=PCDHA4 PE=1 SV=1	116.49	infected_2
Q8IWV7	E3 ubiquitin-protein ligase UBR1 OS=Homo sapiens GN=UBR1 PE=1 SV=1	29.31	infected_2
Q9H869	YY1-associated protein 1 OS=Homo sapiens GN=YY1AP1 PE=1 SV=2	72.34	infected_2
P07196	Neurofilament light polypeptide OS=Homo sapiens GN=NEFL PE=1 SV=3	35.52	infected_2
Q9NQ38	Serine protease inhibitor Kazal-type 5 OS=Homo sapiens GN=SPINK5 PE=1 SV=2	42.37	infected_2
P35573	Glycogen debranching enzyme OS=Homo sapiens GN=AGL PE=1 SV=3	45.69	infected_2
Q14151	Scaffold attachment factor B2 OS=Homo sapiens GN=SAFB2 PE=1 SV=1	101.22	infected_2
Q9NPR2	Semaphorin-4B OS=Homo sapiens GN=SEMA4B PE=1 SV=3	70.94	infected_2
P46721	Solute carrier organic anion transporter family member 1A2 OS=Homo sapiens GN=SLCO1A2 PE=2 SV=1	76.04	infected_2
Q00610	Clathrin heavy chain 1 OS=Homo sapiens GN=CLTC PE=1 SV=5	17.29	infected_2
Q9Y4W6	AFG3-like protein 2 OS=Homo sapiens GN=AFG3L2 PE=1 SV=2	101.88	infected_2
Q9H1H9	Kinesin-like protein KIF13A OS=Homo sapiens GN=KIF13A PE=1 SV=2	106.25	infected_2
Q8IWU2	Serine/threonine-protein kinase LMTK2 OS=Homo sapiens GN=LMTK2 PE=1 SV=2	126.17	infected_2
Q14147	Probable ATP-dependent RNA helicase DHX34 OS=Homo sapiens GN=DHX34 PE=1 SV=2	34.56	infected_2
O14709	Zinc finger protein 197 OS=Homo sapiens GN=ZNF197 PE=2 SV=1	36.09	infected_2
O00291	Huntingtin-interacting protein 1 OS=Homo sapiens GN=HIP1 PE=1 SV=5	93.01	infected_2
Q16670	Zinc finger and SCAN domain-containing protein 26 OS=Homo sapiens GN=ZSCAN26 PE=1 SV=2	139.03	infected_2
Q5VTT5	Myomesin-3 OS=Homo sapiens GN=MYOM3 PE=2 SV=1	97.15	infected_2
Q8IWT6	Volume-regulated anion channel subunit LRRC8A OS=Homo sapiens GN=LRRC8A PE=1 SV=1	24.26	infected_2
P16157	Ankyrin-1 OS=Homo sapiens GN=ANK1 PE=1 SV=3	85.82	infected_2
Q13045	Protein flightless-1 homolog OS=Homo sapiens GN=FLII PE=1 SV=2	100.66	infected_2
Q6ZVD8	PH domain leucine-rich repeat-containing protein phosphatase 2 OS=Homo sapiens GN=PHLPP2 PE=1 SV=3	33.85	infected_2
P78552	Interleukin-13 receptor subunit alpha-1 OS=Homo sapiens GN=IL13RA1 PE=1 SV=1	17.39	infected_2
Q8NFA0	Ubiquitin carboxyl-terminal hydrolase 32 OS=Homo sapiens GN=USP32 PE=1 SV=1	46.41	infected_2
P08253	72 kDa type IV collagenase OS=Homo sapiens GN=MMP2 PE=1 SV=2	111.29	infected_2
Q9P2N2	Rho GTPase-activating protein 28 OS=Homo sapiens GN=ARHGAP28 PE=1 SV=3	99.78	infected_2
Q92670	Putative zinc finger protein 75C OS=Homo sapiens GN=ZNF75CP PE=5 SV=2	79.43	infected_2
Q7Z3Z3	Piwi-like protein 3 OS=Homo sapiens GN=PIWIL3 PE=2 SV=2	43.77	infected_2
Q969P6	DNA topoisomerase I, mitochondrial OS=Homo sapiens GN=TOP1MT PE=1 SV=1	37.56	infected_2
Q8IZX4	Transcription initiation factor TFIID subunit 1-like OS=Homo sapiens GN=TAF1L PE=1 SV=1	49.52	infected_2
Q14114	Low-density lipoprotein receptor-related protein 8 OS=Homo sapiens GN=LRP8 PE=1 SV=4	61.29	infected_2
O95251	Histone acetyltransferase KAT7 OS=Homo sapiens GN=KAT7 PE=1 SV=1	81.27	infected_2
Q8WXE9	Stonin-2 OS=Homo sapiens GN=STON2 PE=1 SV=1	68.19	infected_2
Q9UPW8	Protein unc-13 homolog A OS=Homo sapiens GN=UNC13A PE=2 SV=4	50.46	infected_2
P20908	Collagen alpha-1(V) chain OS=Homo sapiens GN=COL5A1 PE=1 SV=3	40.09	infected_2
Q9C026	E3 ubiquitin-protein ligase TRIM9 OS=Homo sapiens GN=TRIM9 PE=1 SV=1	65.8	infected_2
P62820	Ras-related protein Rab-1A OS=Homo sapiens GN=RAB1A PE=1 SV=3	98.8	infected_2
Q86UK7	Zinc finger protein 598 OS=Homo sapiens GN=ZNF598 PE=1 SV=1	34.62	infected_2
P52756	RNA-binding protein 5 OS=Homo sapiens GN=RBM5 PE=1 SV=2	14.21	infected_2
Q7Z494	Nephrocystin-3 OS=Homo sapiens GN=NPHP3 PE=1 SV=1	14.89	infected_2
Q9Y4R8	Telomere length regulation protein TEL2 homolog OS=Homo sapiens GN=TELO2 PE=1 SV=2	79.61	infected_2
Q9UPV9	Trafficking kinesin-binding protein 1 OS=Homo sapiens GN=TRAK1 PE=1 SV=1	20.84	infected_2
Q8WXD9	Caskin-1 OS=Homo sapiens GN=CASKIN1 PE=1 SV=1	120.36	infected_2
P01854	Ig epsilon chain C region OS=Homo sapiens GN=IGHE PE=1 SV=1	10.8	infected_2
P78524	Suppression of tumorigenicity 5 protein OS=Homo sapiens GN=ST5 PE=1 SV=3	9.52	infected_2
Q8WXD2	Secretogranin-3 OS=Homo sapiens GN=SCG3 PE=1 SV=3	80.56	infected_2
O60486	Plexin-C1 OS=Homo sapiens GN=PLXNC1 PE=1 SV=1	73.2	infected_2
Q3KNS6	Zinc finger protein 829 OS=Homo sapiens GN=ZNF829 PE=2 SV=1	200.8	infected_2
Q5T9A4	ATPase family AAA domain-containing protein 3B OS=Homo sapiens GN=ATAD3B PE=1 SV=1	12.93	infected_2
P27987	Inositol-trisphosphate 3-kinase B OS=Homo sapiens GN=ITPKB PE=1 SV=5	45.01	infected_2
Q13363	C-terminal-binding protein 1 OS=Homo sapiens GN=CTBP1 PE=1 SV=2	49.89	infected_2
Q6P6B7	Ankyrin repeat domain-containing protein 16 OS=Homo sapiens GN=ANKRD16 PE=1 SV=1	161.11	infected_2
Q8IZU2	WD repeat-containing protein 17 OS=Homo sapiens GN=WDR17 PE=2 SV=2	66.26	infected_2
Q6IV72	Zinc finger protein 425 OS=Homo sapiens GN=ZNF425 PE=1 SV=1	70.68	infected_2
Q92636	Protein FAN OS=Homo sapiens GN=NSMAF PE=1 SV=2	51.94	infected_2
P35503	UDP-glucuronosyltransferase 1-3 OS=Homo sapiens GN=UGT1A3 PE=1 SV=1	72.91	infected_2
Q8WXB4	Zinc finger protein 606 OS=Homo sapiens GN=ZNF606 PE=2 SV=1	5	infected_2
Q5VWT5	Uncharacterized protein C1orf168 OS=Homo sapiens GN=C1orf168 PE=2 SV=1	105.56	infected_2
P41219	Peripherin OS=Homo sapiens GN=PRPH PE=1 SV=2	31.83	infected_2
Q92625	Ankyrin repeat and SAM domain-containing protein 1A OS=Homo sapiens GN=ANKS1A PE=1 SV=4	88.18	infected_2
Q8N9B5	Junction-mediating and -regulatory protein OS=Homo sapiens GN=JMY PE=1 SV=2	117.34	infected_2
P56199	Integrin alpha-1 OS=Homo sapiens GN=ITGA1 PE=1 SV=2	156.53	infected_2
O00222	Metabotropic glutamate receptor 8 OS=Homo sapiens GN=GRM8 PE=2 SV=2	23.93	infected_2
Q9UPS8	Ankyrin repeat domain-containing protein 26 OS=Homo sapiens GN=ANKRD26 PE=1 SV=3	24.5	infected_2
Q7Z460	CLIP-associating protein 1 OS=Homo sapiens GN=CLASP1 PE=1 SV=1	67.62	infected_2
Q8NEZ3	WD repeat-containing protein 19 OS=Homo sapiens GN=WDR19 PE=1 SV=2	49.39	infected_2
Q8WXA3	RUN and FYVE domain-containing protein 2 OS=Homo sapiens GN=RUFY2 PE=1 SV=2	157.8	infected_2
Q6P9F7	Volume-regulated anion channel subunit LRRC8B OS=Homo sapiens GN=LRRC8B PE=1 SV=2	66.46	infected_2
P53804	E3 ubiquitin-protein ligase TTC3 OS=Homo sapiens GN=TTC3 PE=1 SV=2	89.34	infected_2
Q3KQV3	Zinc finger protein 792 OS=Homo sapiens GN=ZNF792 PE=1 SV=2	219.27	infected_2
Q86XM0	Cation channel sperm-associated protein subunit delta OS=Homo sapiens GN=CATSPERD PE=1 SV=3	69.11	infected_2
Q9NPI8	Fanconi anemia group F protein OS=Homo sapiens GN=FANCF PE=1 SV=1	170.38	infected_2
Q3BBV1	Neuroblastoma breakpoint family member 20 OS=Homo sapiens GN=NBPF20 PE=2 SV=1	0	infected_2
Q92614	Unconventional myosin-XVIIIa OS=Homo sapiens GN=MYO18A PE=1 SV=3	138.17	infected_2
Q6L8Q7	2',5'-phosphodiesterase 12 OS=Homo sapiens GN=PDE12 PE=1 SV=2	54.46	infected_2
Q5JV73	FERM and PDZ domain-containing protein 3 OS=Homo sapiens GN=FRMPD3 PE=2 SV=2	46.02	infected_2
Q92610	Zinc finger protein 592 OS=Homo sapiens GN=ZNF592 PE=1 SV=2	54.69	infected_2
Q96FC9	Probable ATP-dependent RNA helicase DDX11 OS=Homo sapiens GN=DDX11 PE=1 SV=1	94.54	infected_2
P50895	Basal cell adhesion molecule OS=Homo sapiens GN=BCAM PE=1 SV=2	42.42	infected_2
P30042	ES1 protein homolog, mitochondrial OS=Homo sapiens GN=C21orf33 PE=1 SV=3	15.48	infected_2
Q86XL3	Ankyrin repeat and LEM domain-containing protein 2 OS=Homo sapiens GN=ANKLE2 PE=1 SV=4	105.53	infected_2
Q92966	snRNA-activating protein complex subunit 3 OS=Homo sapiens GN=SNAPC3 PE=1 SV=1	186.53	infected_2
Q96M02	Centrosomal protein C10orf90 OS=Homo sapiens GN=C10orf90 PE=2 SV=2	23.73	infected_2
Q7Z3S7	Voltage-dependent calcium channel subunit alpha-2/delta-4 OS=Homo sapiens GN=CACNA2D4 PE=1 SV=2	39.92	infected_2
Q8N2S1	Latent-transforming growth factor beta-binding protein 4 OS=Homo sapiens GN=LTBP4 PE=1 SV=2	60.05	infected_2
Q8N5Y2	Male-specific lethal 3 homolog OS=Homo sapiens GN=MSL3 PE=1 SV=1	52.97	infected_2
Q8NF99	Zinc finger protein 397 OS=Homo sapiens GN=ZNF397 PE=1 SV=2	34.25	infected_2
Q14D04	Ventricular zone-expressed PH domain-containing protein homolog 1 OS=Homo sapiens GN=VEPH1 PE=2 SV=1	85.49	infected_2
P84550	SKI family transcriptional corepressor 1 OS=Homo sapiens GN=SKOR1 PE=1 SV=1	51.7	infected_2
Q15858	Sodium channel protein type 9 subunit alpha OS=Homo sapiens GN=SCN9A PE=1 SV=3	215.5	infected_2
Q9P2F5	Storkhead-box protein 2 OS=Homo sapiens GN=STOX2 PE=2 SV=2	14.68	infected_2
Q49AJ0	Protein FAM135B OS=Homo sapiens GN=FAM135B PE=2 SV=2	55.61	infected_2
Q86XK2	F-box only protein 11 OS=Homo sapiens GN=FBXO11 PE=1 SV=3	114.25	infected_2
Q14766	Latent-transforming growth factor beta-binding protein 1 OS=Homo sapiens GN=LTBP1 PE=1 SV=4	145.08	infected_2
A2RUR9	Coiled-coil domain-containing protein 144A OS=Homo sapiens GN=CCDC144A PE=1 SV=1	70.01	infected_2
P04180	Phosphatidylcholine-sterol acyltransferase OS=Homo sapiens GN=LCAT PE=1 SV=1	90.88	infected_2
Q99683	Mitogen-activated protein kinase kinase kinase 5 OS=Homo sapiens GN=MAP3K5 PE=1 SV=1	84.1	infected_2
Q9Y4L1	Hypoxia up-regulated protein 1 OS=Homo sapiens GN=HYOU1 PE=1 SV=1	35.65	infected_2
Q5T2N8	ATPase family AAA domain-containing protein 3C OS=Homo sapiens GN=ATAD3C PE=2 SV=2	8.47	infected_2
Q9UPP1	Histone lysine demethylase PHF8 OS=Homo sapiens GN=PHF8 PE=1 SV=3	94.02	infected_2
Q5SQN1	Synaptosomal-associated protein 47 OS=Homo sapiens GN=SNAP47 PE=1 SV=3	36.48	infected_2
Q8IWJ2	GRIP and coiled-coil domain-containing protein 2 OS=Homo sapiens GN=GCC2 PE=1 SV=4	115.11	infected_2
Q9P2E2	Kinesin-like protein KIF17 OS=Homo sapiens GN=KIF17 PE=2 SV=3	75.62	infected_2
Q92945	Far upstream element-binding protein 2 OS=Homo sapiens GN=KHSRP PE=1 SV=4	323.49	infected_2
O75044	SLIT-ROBO Rho GTPase-activating protein 2 OS=Homo sapiens GN=SRGAP2 PE=1 SV=2	9.05	infected_2
Q9NVR7	TBCC domain-containing protein 1 OS=Homo sapiens GN=TBCCD1 PE=2 SV=1	91.3	infected_2
Q8NEV8	Exophilin-5 OS=Homo sapiens GN=EXPH5 PE=1 SV=3	136.05	infected_2
Q96BY7	Autophagy-related protein 2 homolog B OS=Homo sapiens GN=ATG2B PE=1 SV=5	101.52	infected_2
Q9P2D3	HEAT repeat-containing protein 5B OS=Homo sapiens GN=HEATR5B PE=1 SV=2	50.11	infected_2
Q99665	Interleukin-12 receptor subunit beta-2 OS=Homo sapiens GN=IL12RB2 PE=1 SV=1	54.17	infected_2
P13497	Bone morphogenetic protein 1 OS=Homo sapiens GN=BMP1 PE=1 SV=2	54.79	infected_2
Q8N307	Mucin-20 OS=Homo sapiens GN=MUC20 PE=1 SV=3	324.31	infected_2
O95872	G patch domain and ankyrin repeat-containing protein 1 OS=Homo sapiens GN=GPANK1 PE=1 SV=1	27.31	infected_2
Q8N660	Neuroblastoma breakpoint family member 15 OS=Homo sapiens GN=NBPF15 PE=2 SV=2	10.03	infected_2
Q8NET4	Retrotransposon gag domain-containing protein 1 OS=Homo sapiens GN=RGAG1 PE=1 SV=1	41.29	infected_2
Q5VWM5	PRAME family member 9/15 OS=Homo sapiens GN=PRAMEF9 PE=2 SV=1	43.7	infected_2
O43526	Potassium voltage-gated channel subfamily KQT member 2 OS=Homo sapiens GN=KCNQ2 PE=1 SV=2	40.33	infected_2
Q8IWG1	WD repeat-containing protein 63 OS=Homo sapiens GN=WDR63 PE=2 SV=1	46.35	infected_2
Q6Q788	Apolipoprotein A-V OS=Homo sapiens GN=APOA5 PE=1 SV=1	58.25	infected_2
Q9HA90	EF-hand and coiled-coil domain-containing protein 1 OS=Homo sapiens GN=EFCC1 PE=2 SV=2	19.71	infected_2
P12036	Neurofilament heavy polypeptide OS=Homo sapiens GN=NEFH PE=1 SV=4	73.3	infected_2
P12035	Keratin, type II cytoskeletal 3 OS=Homo sapiens GN=KRT3 PE=1 SV=3	17.84	infected_2
Q9NYU2	UDP-glucose:glycoprotein glucosyltransferase 1 OS=Homo sapiens GN=UGGT1 PE=1 SV=3	160.27	infected_2
Q6TFL3	Coiled-coil domain-containing protein 171 OS=Homo sapiens GN=CCDC171 PE=2 SV=1	39.76	infected_2
Q9UMF0	Intercellular adhesion molecule 5 OS=Homo sapiens GN=ICAM5 PE=1 SV=3	87.91	infected_2
Q8IZL8	Proline-, glutamic acid- and leucine-rich protein 1 OS=Homo sapiens GN=PELP1 PE=1 SV=2	153.11	infected_2
P55036	26S proteasome non-ATPase regulatory subunit 4 OS=Homo sapiens GN=PSMD4 PE=1 SV=1	276.15	infected_2
Q5T5P2	Sickle tail protein homolog OS=Homo sapiens GN=KIAA1217 PE=1 SV=2	76.45	infected_2
O15131	Importin subunit alpha-6 OS=Homo sapiens GN=KPNA5 PE=1 SV=2	83.19	infected_2
O60741	Potassium/sodium hyperpolarization-activated cyclic nucleotide-gated channel 1 OS=Homo sapiens GN=HCN1 PE=1 SV=3	194.77	infected_2
Q96RU2	Ubiquitin carboxyl-terminal hydrolase 28 OS=Homo sapiens GN=USP28 PE=1 SV=1	134.59	infected_2
Q9NYT6	Zinc finger protein 226 OS=Homo sapiens GN=ZNF226 PE=2 SV=2	59.02	infected_2
Q7Z745	Maestro heat-like repeat-containing protein family member 2B OS=Homo sapiens GN=MROH2B PE=2 SV=3	50.79	infected_2
Q8WTR7	Zinc finger protein 473 OS=Homo sapiens GN=ZNF473 PE=1 SV=1	31.74	infected_2
Q8NHX9	Two pore calcium channel protein 2 OS=Homo sapiens GN=TPCN2 PE=1 SV=2	177.45	infected_2
Q8WX93	Palladin OS=Homo sapiens GN=PALLD PE=1 SV=3	48.39	infected_2
O94761	ATP-dependent DNA helicase Q4 OS=Homo sapiens GN=RECQL4 PE=1 SV=1	100.26	infected_2
P38159	RNA-binding motif protein, X chromosome OS=Homo sapiens GN=RBMX PE=1 SV=3	114.92	infected_2
Q9H7D0	Dedicator of cytokinesis protein 5 OS=Homo sapiens GN=DOCK5 PE=1 SV=3	125.24	infected_2
Q32M78	Zinc finger protein 699 OS=Homo sapiens GN=ZNF699 PE=1 SV=1	127.14	infected_2
Q96RT8	Gamma-tubulin complex component 5 OS=Homo sapiens GN=TUBGCP5 PE=1 SV=1	91.88	infected_2
Q96RT7	Gamma-tubulin complex component 6 OS=Homo sapiens GN=TUBGCP6 PE=1 SV=3	60.01	infected_2
Q3SYC2	2-acylglycerol O-acyltransferase 2 OS=Homo sapiens GN=MOGAT2 PE=1 SV=2	69.86	infected_2
P54296	Myomesin-2 OS=Homo sapiens GN=MYOM2 PE=1 SV=2	27.75	infected_2
Q9BX79	Stimulated by retinoic acid gene 6 protein homolog OS=Homo sapiens GN=STRA6 PE=1 SV=1	1.88	infected_2
Q13972	Ras-specific guanine nucleotide-releasing factor 1 OS=Homo sapiens GN=RASGRF1 PE=1 SV=2	113.22	infected_2
Q12888	Tumor suppressor p53-binding protein 1 OS=Homo sapiens GN=TP53BP1 PE=1 SV=2	162.56	infected_2
Q12887	Protoheme IX farnesyltransferase, mitochondrial OS=Homo sapiens GN=COX10 PE=1 SV=3	268.15	infected_2
Q12884	Prolyl endopeptidase FAP OS=Homo sapiens GN=FAP PE=1 SV=5	103.96	infected_2
Q8N988	Zinc finger protein 557 OS=Homo sapiens GN=ZNF557 PE=2 SV=2	163.71	infected_2
O75343	Guanylate cyclase soluble subunit beta-2 OS=Homo sapiens GN=GUCY1B2 PE=2 SV=2	118.8	infected_2
Q09MP3	RAD51-associated protein 2 OS=Homo sapiens GN=RAD51AP2 PE=1 SV=1	100.63	infected_2
Q9Y4E6	WD repeat-containing protein 7 OS=Homo sapiens GN=WDR7 PE=1 SV=2	40.78	infected_2
P48200	Iron-responsive element-binding protein 2 OS=Homo sapiens GN=IREB2 PE=1 SV=3	87.12	infected_2
Q9BX69	Caspase recruitment domain-containing protein 6 OS=Homo sapiens GN=CARD6 PE=1 SV=2	129.2	infected_2
P11274	Breakpoint cluster region protein OS=Homo sapiens GN=BCR PE=1 SV=2	21.54	infected_2
O75339	Cartilage intermediate layer protein 1 OS=Homo sapiens GN=CILP PE=1 SV=4	47.43	infected_2
Q9UG63	ATP-binding cassette sub-family F member 2 OS=Homo sapiens GN=ABCF2 PE=1 SV=2	68.27	infected_2
Q9BWT3	Poly(A) polymerase gamma OS=Homo sapiens GN=PAPOLG PE=1 SV=2	34.6	infected_2
Q8IZH2	5'-3' exoribonuclease 1 OS=Homo sapiens GN=XRN1 PE=1 SV=1	93.28	infected_2
Q12864	Cadherin-17 OS=Homo sapiens GN=CDH17 PE=2 SV=3	56.06	infected_2
O95819	Mitogen-activated protein kinase kinase kinase kinase 4 OS=Homo sapiens GN=MAP4K4 PE=1 SV=2	49.11	infected_2
Q8NEN9	PDZ domain-containing protein 8 OS=Homo sapiens GN=PDZD8 PE=1 SV=1	186.43	infected_2
Q6ZV29	Patatin-like phospholipase domain-containing protein 7 OS=Homo sapiens GN=PNPLA7 PE=1 SV=3	25.1	infected_2
Q13948	Protein CASP OS=Homo sapiens GN=CUX1 PE=1 SV=2	65.05	infected_2
Q6ZRK6	Coiled-coil domain-containing protein 73 OS=Homo sapiens GN=CCDC73 PE=2 SV=2	152.31	infected_2
Q86XA9	HEAT repeat-containing protein 5A OS=Homo sapiens GN=HEATR5A PE=1 SV=2	48.25	infected_2
P80108	Phosphatidylinositol-glycan-specific phospholipase D OS=Homo sapiens GN=GPLD1 PE=1 SV=3	99.09	infected_2
O43823	A-kinase anchor protein 8 OS=Homo sapiens GN=AKAP8 PE=1 SV=1	194.63	infected_2
P21675	Transcription initiation factor TFIID subunit 1 OS=Homo sapiens GN=TAF1 PE=1 SV=2	52.6	infected_2
Q9NVI7	ATPase family AAA domain-containing protein 3A OS=Homo sapiens GN=ATAD3A PE=1 SV=2	68.3	infected_2
Q9NSC2	Sal-like protein 1 OS=Homo sapiens GN=SALL1 PE=1 SV=2	274.27	infected_2
Q9Y4B6	Protein VPRBP OS=Homo sapiens GN=VPRBP PE=1 SV=3	61.23	infected_2
Q9BQF6	Sentrin-specific protease 7 OS=Homo sapiens GN=SENP7 PE=1 SV=4	76.38	infected_2
P33908	Mannosyl-oligosaccharide 1,2-alpha-mannosidase IA OS=Homo sapiens GN=MAN1A1 PE=1 SV=3	57.65	infected_2
Q9P1Z2	Calcium-binding and coiled-coil domain-containing protein 1 OS=Homo sapiens GN=CALCOCO1 PE=1 SV=2	56.56	infected_2
Q562F6	Shugoshin-like 2 OS=Homo sapiens GN=SGOL2 PE=1 SV=2	118.29	infected_2
Q9P1Z0	Zinc finger and BTB domain-containing protein 4 OS=Homo sapiens GN=ZBTB4 PE=1 SV=3	80.44	infected_2
Q96LC7	Sialic acid-binding Ig-like lectin 10 OS=Homo sapiens GN=SIGLEC10 PE=1 SV=3	6.88	infected_2
Q8N2G8	GH3 domain-containing protein OS=Homo sapiens GN=GHDC PE=1 SV=2	363.88	infected_2
P24928	DNA-directed RNA polymerase II subunit RPB1 OS=Homo sapiens GN=POLR2A PE=1 SV=2	211.33	infected_2
O75309	Cadherin-16 OS=Homo sapiens GN=CDH16 PE=2 SV=1	82.46	infected_2
Q3MJ40	Coiled-coil domain-containing protein 144B OS=Homo sapiens GN=CCDC144B PE=2 SV=1	17.48	infected_2
Q8TDW0	Volume-regulated anion channel subunit LRRC8C OS=Homo sapiens GN=LRRC8C PE=1 SV=2	130.59	infected_2
Q8NI35	InaD-like protein OS=Homo sapiens GN=INADL PE=1 SV=3	126.29	infected_2
Q5VZK9	Leucine-rich repeat-containing protein 16A OS=Homo sapiens GN=LRRC16A PE=1 SV=1	119.71	infected_2
Q9P1Y5	Calmodulin-regulated spectrin-associated protein 3 OS=Homo sapiens GN=CAMSAP3 PE=1 SV=2	30.74	infected_2
Q86TX2	Acyl-coenzyme A thioesterase 1 OS=Homo sapiens GN=ACOT1 PE=1 SV=1	6.11	infected_2
Q6ZRH7	Cation channel sperm-associated protein subunit gamma OS=Homo sapiens GN=CATSPERG PE=2 SV=3	53.24	infected_2
Q8NHQ9	ATP-dependent RNA helicase DDX55 OS=Homo sapiens GN=DDX55 PE=1 SV=3	24.64	infected_2
Q8NHQ8	Ras association domain-containing protein 8 OS=Homo sapiens GN=RASSF8 PE=1 SV=2	53.7	infected_2
Q149N8	E3 ubiquitin-protein ligase SHPRH OS=Homo sapiens GN=SHPRH PE=1 SV=2	67.52	infected_2
P11216	Glycogen phosphorylase, brain form OS=Homo sapiens GN=PYGB PE=1 SV=5	243.92	infected_2
Q01668	Voltage-dependent L-type calcium channel subunit alpha-1D OS=Homo sapiens GN=CACNA1D PE=1 SV=2	55.82	infected_2
A8MV65	Transcription cofactor vestigial-like protein 3 OS=Homo sapiens GN=VGLL3 PE=2 SV=1	64.56	infected_2
P39880	Homeobox protein cut-like 1 OS=Homo sapiens GN=CUX1 PE=1 SV=3	73.53	infected_2
Q9P1W3	Calcium permeable stress-gated cation channel 1 OS=Homo sapiens GN=TMEM63C PE=2 SV=1	27.57	infected_2
Q2TV78	Putative macrophage stimulating 1-like protein OS=Homo sapiens GN=MST1L PE=2 SV=2	90.15	infected_2
Q0IIM8	TBC1 domain family member 8B OS=Homo sapiens GN=TBC1D8B PE=1 SV=2	99.08	infected_2
Q8TE56	A disintegrin and metalloproteinase with thrombospondin motifs 17 OS=Homo sapiens GN=ADAMTS17 PE=2 SV=2	77.29	infected_2
Q8TE54	Anion exchange transporter OS=Homo sapiens GN=SLC26A7 PE=2 SV=2	74.54	infected_2
Q02742	Beta-1,3-galactosyl-O-glycosyl-glycoprotein beta-1,6-N-acetylglucosaminyltransferase OS=Homo sapiens GN=GCNT1 PE=1 SV=2	24.69	infected_2
Q9H3T2	Semaphorin-6C OS=Homo sapiens GN=SEMA6C PE=2 SV=4	55.77	infected_2
Q6NT04	Tigger transposable element-derived protein 7 OS=Homo sapiens GN=TIGD7 PE=1 SV=1	126.78	infected_2
O75628	GTP-binding protein REM 1 OS=Homo sapiens GN=REM1 PE=1 SV=2	19.16	infected_2
Q96RK0	Protein capicua homolog OS=Homo sapiens GN=CIC PE=1 SV=2	61.24	infected_2
Q8TAM1	Bardet-Biedl syndrome 10 protein OS=Homo sapiens GN=BBS10 PE=1 SV=2	112.14	infected_2
P01133	Pro-epidermal growth factor OS=Homo sapiens GN=EGF PE=1 SV=2	74.5	infected_2
Q6PHR2	Serine/threonine-protein kinase ULK3 OS=Homo sapiens GN=ULK3 PE=1 SV=2	127.08	infected_2
Q9NP73	Putative bifunctional UDP-N-acetylglucosamine transferase and deubiquitinase ALG13 OS=Homo sapiens GN=ALG13 PE=1 SV=2	31.39	infected_2
Q8TDR0	TRAF3-interacting protein 1 OS=Homo sapiens GN=TRAF3IP1 PE=1 SV=1	62.24	infected_2
O75970	Multiple PDZ domain protein OS=Homo sapiens GN=MPDZ PE=1 SV=2	167.86	infected_2
Q9H0L4	Cleavage stimulation factor subunit 2 tau variant OS=Homo sapiens GN=CSTF2T PE=1 SV=1	19.71	infected_2
P49917	DNA ligase 4 OS=Homo sapiens GN=LIG4 PE=1 SV=2	97.02	infected_2
Q96RI1	Bile acid receptor OS=Homo sapiens GN=NR1H4 PE=1 SV=2	62.47	infected_2
Q0VF96	Cingulin-like protein 1 OS=Homo sapiens GN=CGNL1 PE=1 SV=2	101.46	infected_2
P47736	Rap1 GTPase-activating protein 1 OS=Homo sapiens GN=RAP1GAP PE=1 SV=2	122.11	infected_2
Q3SY77	UDP-glucuronosyltransferase 3A2 OS=Homo sapiens GN=UGT3A2 PE=2 SV=1	60.16	infected_2
P35498	Sodium channel protein type 1 subunit alpha OS=Homo sapiens GN=SCN1A PE=1 SV=2	73.18	infected_2
O14639	Actin-binding LIM protein 1 OS=Homo sapiens GN=ABLIM1 PE=1 SV=3	43.73	infected_2
Q6P2D8	X-ray radiation resistance-associated protein 1 OS=Homo sapiens GN=XRRA1 PE=2 SV=2	91.39	infected_2
Q9ULW2	Frizzled-10 OS=Homo sapiens GN=FZD10 PE=1 SV=1	88.23	infected_2
Q3B8N5	Prospero homeobox protein 2 OS=Homo sapiens GN=PROX2 PE=2 SV=3	28.6	infected_2
P35125	Ubiquitin carboxyl-terminal hydrolase 6 OS=Homo sapiens GN=USP6 PE=1 SV=2	91.68	infected_2
Q7Z6E9	E3 ubiquitin-protein ligase RBBP6 OS=Homo sapiens GN=RBBP6 PE=1 SV=1	33.94	infected_2
Q9NRY4	Rho GTPase-activating protein 35 OS=Homo sapiens GN=ARHGAP35 PE=1 SV=3	69.68	infected_2
O14981	TATA-binding protein-associated factor 172 OS=Homo sapiens GN=BTAF1 PE=1 SV=2	23.87	infected_2
Q6ZUG5	Uncharacterized protein FLJ43738 OS=Homo sapiens PE=2 SV=1	35.23	infected_2
P02538	Keratin, type II cytoskeletal 6A OS=Homo sapiens GN=KRT6A PE=1 SV=3	17.27	infected_2
Q14055	Collagen alpha-2(IX) chain OS=Homo sapiens GN=COL9A2 PE=1 SV=2	118.98	infected_2
Q9NS98	Semaphorin-3G OS=Homo sapiens GN=SEMA3G PE=2 SV=1	62.94	infected_2
O14617	AP-3 complex subunit delta-1 OS=Homo sapiens GN=AP3D1 PE=1 SV=1	12.26	infected_2
Q8N8J6	Zinc finger protein 615 OS=Homo sapiens GN=ZNF615 PE=2 SV=2	76.23	infected_2
Q53EL9	Seizure protein 6 homolog OS=Homo sapiens GN=SEZ6 PE=1 SV=2	15.18	infected_2
O14975	Very long-chain acyl-CoA synthetase OS=Homo sapiens GN=SLC27A2 PE=1 SV=2	125.19	infected_2
O14974	Protein phosphatase 1 regulatory subunit 12A OS=Homo sapiens GN=PPP1R12A PE=1 SV=1	84.78	infected_2
A6NKB5	Pecanex-like protein 2 OS=Homo sapiens GN=PCNXL2 PE=2 SV=3	63.54	infected_2
Q16584	Mitogen-activated protein kinase kinase kinase 11 OS=Homo sapiens GN=MAP3K11 PE=1 SV=1	144.22	infected_2
Q8WWI5	Choline transporter-like protein 1 OS=Homo sapiens GN=SLC44A1 PE=1 SV=1	76.61	infected_2
Q17RN3	Protein FAM98C OS=Homo sapiens GN=FAM98C PE=2 SV=1	200.6	infected_2
P28300	Protein-lysine 6-oxidase OS=Homo sapiens GN=LOX PE=1 SV=2	64.45	infected_2
P16066	Atrial natriuretic peptide receptor 1 OS=Homo sapiens GN=NPR1 PE=1 SV=1	13.38	infected_2
Q7RTY8	Transmembrane protease serine 7 OS=Homo sapiens GN=TMPRSS7 PE=2 SV=3	117.94	infected_2
Q3MII6	TBC1 domain family member 25 OS=Homo sapiens GN=TBC1D25 PE=1 SV=2	1.7	infected_2
Q5JR98	Tctex1 domain-containing protein 4 OS=Homo sapiens GN=TCTEX1D4 PE=1 SV=1	41.93	infected_2
Q96RE9	Zinc finger protein 300 OS=Homo sapiens GN=ZNF300 PE=1 SV=1	153.99	infected_2
Q5TAX3	Terminal uridylyltransferase 4 OS=Homo sapiens GN=ZCCHC11 PE=1 SV=3	41.78	infected_2
P41180	Extracellular calcium-sensing receptor OS=Homo sapiens GN=CASR PE=1 SV=2	114.17	infected_2
Q96L93	Kinesin-like protein KIF16B OS=Homo sapiens GN=KIF16B PE=1 SV=2	137.77	infected_2
O00192	Armadillo repeat protein deleted in velo-cardio-facial syndrome OS=Homo sapiens GN=ARVCF PE=1 SV=1	39.47	infected_2
Q8NEB7	Acrosin-binding protein OS=Homo sapiens GN=ACRBP PE=2 SV=1	160.51	infected_2
P42263	Glutamate receptor 3 OS=Homo sapiens GN=GRIA3 PE=1 SV=2	27.71	infected_2
P42262	Glutamate receptor 2 OS=Homo sapiens GN=GRIA2 PE=1 SV=3	13.94	infected_2
O43196	MutS protein homolog 5 OS=Homo sapiens GN=MSH5 PE=1 SV=1	5.56	infected_2
P42261	Glutamate receptor 1 OS=Homo sapiens GN=GRIA1 PE=1 SV=2	100.76	infected_2
Q8IVT5	Kinase suppressor of Ras 1 OS=Homo sapiens GN=KSR1 PE=1 SV=3	26.83	infected_2
Q5TB80	Centrosomal protein of 162 kDa OS=Homo sapiens GN=CEP162 PE=1 SV=2	69.37	infected_2
Q9HCL3	Zinc finger protein 14 homolog OS=Homo sapiens GN=ZFP14 PE=2 SV=2	216.46	infected_2
Q14C87	Transmembrane protein 132D OS=Homo sapiens GN=TMEM132D PE=1 SV=1	46.83	infected_2
O43184	Disintegrin and metalloproteinase domain-containing protein 12 OS=Homo sapiens GN=ADAM12 PE=1 SV=3	95.02	infected_2
Q96BD5	PHD finger protein 21A OS=Homo sapiens GN=PHF21A PE=1 SV=1	63.27	infected_2
Q96KV7	WD repeat-containing protein 90 OS=Homo sapiens GN=WDR90 PE=1 SV=2	29.52	infected_2
P59047	NACHT, LRR and PYD domains-containing protein 5 OS=Homo sapiens GN=NLRP5 PE=2 SV=2	54.98	infected_2
Q9NRU3	Metal transporter CNNM1 OS=Homo sapiens GN=CNNM1 PE=2 SV=3	148.05	infected_2
Q9UP95	Solute carrier family 12 member 4 OS=Homo sapiens GN=SLC12A4 PE=1 SV=2	107.77	infected_2
Q9H0E9	Bromodomain-containing protein 8 OS=Homo sapiens GN=BRD8 PE=1 SV=2	29.54	infected_2
P36888	Receptor-type tyrosine-protein kinase FLT3 OS=Homo sapiens GN=FLT3 PE=1 SV=2	20.48	infected_2
Q15465	Sonic hedgehog protein OS=Homo sapiens GN=SHH PE=1 SV=1	70.09	infected_2
P61647	Alpha-2,8-sialyltransferase 8F OS=Homo sapiens GN=ST8SIA6 PE=2 SV=1	11.49	infected_2
A0FGR9	Extended synaptotagmin-3 OS=Homo sapiens GN=ESYT3 PE=1 SV=1	26.53	infected_2
O95155	Ubiquitin conjugation factor E4 B OS=Homo sapiens GN=UBE4B PE=1 SV=1	65.45	infected_2
O95153	Peripheral-type benzodiazepine receptor-associated protein 1 OS=Homo sapiens GN=BZRAP1 PE=1 SV=2	75.53	infected_2
Q06481	Amyloid-like protein 2 OS=Homo sapiens GN=APLP2 PE=1 SV=2	92.01	infected_2
Q7Z2Y5	Nik-related protein kinase OS=Homo sapiens GN=NRK PE=1 SV=2	128.85	infected_2
Q9NYA3	Golgin subfamily A member 6A OS=Homo sapiens GN=GOLGA6A PE=2 SV=3	31.87	infected_2
Q9ULQ1	Two pore calcium channel protein 1 OS=Homo sapiens GN=TPCN1 PE=1 SV=3	122.37	infected_2
Q8NB90	Spermatogenesis-associated protein 5 OS=Homo sapiens GN=SPATA5 PE=1 SV=3	105.94	infected_2
Q5VT25	Serine/threonine-protein kinase MRCK alpha OS=Homo sapiens GN=CDC42BPA PE=1 SV=1	135.26	infected_2
A4FU69	EF-hand calcium-binding domain-containing protein 5 OS=Homo sapiens GN=EFCAB5 PE=1 SV=3	169.33	infected_2
O43164	E3 ubiquitin-protein ligase Praja-2 OS=Homo sapiens GN=PJA2 PE=1 SV=4	42.23	infected_2
Q5JR59	Microtubule-associated tumor suppressor candidate 2 OS=Homo sapiens GN=MTUS2 PE=1 SV=3	57.16	infected_2
P52657	Transcription initiation factor IIA subunit 2 OS=Homo sapiens GN=GTF2A2 PE=1 SV=1	146.04	infected_2
Q14005	Pro-interleukin-16 OS=Homo sapiens GN=IL16 PE=1 SV=4	58.61	infected_2
P35789	Zinc finger protein 93 OS=Homo sapiens GN=ZNF93 PE=2 SV=4	110.84	infected_2
Q16537	Serine/threonine-protein phosphatase 2A 56 kDa regulatory subunit epsilon isoform OS=Homo sapiens GN=PPP2R5E PE=1 SV=1	4.8	infected_2
Q7Z2X4	PTB-containing, cubilin and LRP1-interacting protein OS=Homo sapiens GN=PID1 PE=1 SV=1	17.98	infected_2
Q9UP79	A disintegrin and metalloproteinase with thrombospondin motifs 8 OS=Homo sapiens GN=ADAMTS8 PE=2 SV=2	32.64	infected_2
A6NNC1	Putative POM121-like protein 1-like OS=Homo sapiens PE=5 SV=3	120.68	infected_2
Q9Y6X0	SET-binding protein OS=Homo sapiens GN=SETBP1 PE=1 SV=3	181.75	infected_2
Q5T8A7	Protein phosphatase 1 regulatory subunit 26 OS=Homo sapiens GN=PPP1R26 PE=1 SV=1	102.37	infected_2
O43150	Arf-GAP with SH3 domain, ANK repeat and PH domain-containing protein 2 OS=Homo sapiens GN=ASAP2 PE=1 SV=3	87.64	infected_2
Q92547	DNA topoisomerase 2-binding protein 1 OS=Homo sapiens GN=TOPBP1 PE=1 SV=3	121.95	infected_2
Q96L42	Potassium voltage-gated channel subfamily H member 8 OS=Homo sapiens GN=KCNH8 PE=2 SV=2	192.92	infected_2
O14917	Protocadherin-17 OS=Homo sapiens GN=PCDH17 PE=2 SV=2	29.23	infected_2
Q9NRR4	Ribonuclease 3 OS=Homo sapiens GN=DROSHA PE=1 SV=2	115.88	infected_2
Q9HCH0	Nck-associated protein 5-like OS=Homo sapiens GN=NCKAP5L PE=1 SV=2	61.71	infected_2
Q9Y3Q4	Potassium/sodium hyperpolarization-activated cyclic nucleotide-gated channel 4 OS=Homo sapiens GN=HCN4 PE=1 SV=1	24.04	infected_2
P78415	Iroquois-class homeodomain protein IRX-3 OS=Homo sapiens GN=IRX3 PE=2 SV=3	30.79	infected_2
O43147	Small G protein signaling modulator 2 OS=Homo sapiens GN=SGSM2 PE=1 SV=4	67.35	infected_2
P78412	Iroquois-class homeodomain protein IRX-6 OS=Homo sapiens GN=IRX6 PE=2 SV=3	128.54	infected_2
Q7LBC6	Lysine-specific demethylase 3B OS=Homo sapiens GN=KDM3B PE=1 SV=2	41.65	infected_2
P19623	Spermidine synthase OS=Homo sapiens GN=SRM PE=1 SV=1	7.16	infected_2
Q8IYU2	E3 ubiquitin-protein ligase HACE1 OS=Homo sapiens GN=HACE1 PE=1 SV=2	90.7	infected_2
O00139	Kinesin-like protein KIF2A OS=Homo sapiens GN=KIF2A PE=1 SV=3	21.71	infected_2
A6NDN3	Putative golgin subfamily A member 6B OS=Homo sapiens GN=GOLGA6B PE=5 SV=3	31.87	infected_2
Q9Y3P9	Rab GTPase-activating protein 1 OS=Homo sapiens GN=RABGAP1 PE=1 SV=3	121.37	infected_2
Q8N8C0	Zinc finger protein 781 OS=Homo sapiens GN=ZNF781 PE=2 SV=1	88.97	infected_2
Q4V348	Zinc finger protein 658B OS=Homo sapiens GN=ZNF658B PE=2 SV=1	62.36	infected_2
Q15424	Scaffold attachment factor B1 OS=Homo sapiens GN=SAFB PE=1 SV=4	108.05	infected_2
O76074	cGMP-specific 3',5'-cyclic phosphodiesterase OS=Homo sapiens GN=PDE5A PE=1 SV=2	29.11	infected_2
Q07890	Son of sevenless homolog 2 OS=Homo sapiens GN=SOS2 PE=1 SV=2	147.59	infected_2
O43493	Trans-Golgi network integral membrane protein 2 OS=Homo sapiens GN=TGOLN2 PE=1 SV=2	28.97	infected_2
Q92887	Canalicular multispecific organic anion transporter 1 OS=Homo sapiens GN=ABCC2 PE=1 SV=3	41.15	infected_2
Q5JU85	IQ motif and SEC7 domain-containing protein 2 OS=Homo sapiens GN=IQSEC2 PE=1 SV=1	132.11	infected_2
F5GYI3	Ubiquitin-associated protein 1-like OS=Homo sapiens GN=UBAP1L PE=2 SV=1	47.69	infected_2
Q14693	Phosphatidate phosphatase LPIN1 OS=Homo sapiens GN=LPIN1 PE=1 SV=2	42.15	infected_2
Q14692	Ribosome biogenesis protein BMS1 homolog OS=Homo sapiens GN=BMS1 PE=1 SV=1	143.75	infected_2
Q14690	Protein RRP5 homolog OS=Homo sapiens GN=PDCD11 PE=1 SV=3	115.4	infected_2
Q13242	Serine/arginine-rich splicing factor 9 OS=Homo sapiens GN=SRSF9 PE=1 SV=1	24.8	infected_2
Q99250	Sodium channel protein type 2 subunit alpha OS=Homo sapiens GN=SCN2A PE=1 SV=3	106.69	infected_2
P50443	Sulfate transporter OS=Homo sapiens GN=SLC26A2 PE=1 SV=2	201.63	infected_2
Q9UIF8	Bromodomain adjacent to zinc finger domain protein 2B OS=Homo sapiens GN=BAZ2B PE=1 SV=3	49.56	infected_2
Q6P1X5	Transcription initiation factor TFIID subunit 2 OS=Homo sapiens GN=TAF2 PE=1 SV=3	122.77	infected_2
Q9ULL0	Uncharacterized protein KIAA1210 OS=Homo sapiens GN=KIAA1210 PE=2 SV=3	60.35	infected_2
Q5VW36	Focadhesin OS=Homo sapiens GN=FOCAD PE=1 SV=1	59.13	infected_2
Q15768	Ephrin-B3 OS=Homo sapiens GN=EFNB3 PE=1 SV=1	228.76	infected_2
O60341	Lysine-specific histone demethylase 1A OS=Homo sapiens GN=KDM1A PE=1 SV=2	80.97	infected_2
P07358	Complement component C8 beta chain OS=Homo sapiens GN=C8B PE=1 SV=3	90.45	infected_2
A6NDK9	Putative golgin subfamily A member 6C OS=Homo sapiens GN=GOLGA6C PE=5 SV=1	31.87	infected_2
Q96NU0	Contactin-associated protein-like 3B OS=Homo sapiens GN=CNTNAP3B PE=2 SV=2	78.24	infected_2
Q9UBX5	Fibulin-5 OS=Homo sapiens GN=FBLN5 PE=1 SV=1	109.82	infected_2
P23497	Nuclear autoantigen Sp-100 OS=Homo sapiens GN=SP100 PE=1 SV=3	49.22	infected_2
Q8TDD1	ATP-dependent RNA helicase DDX54 OS=Homo sapiens GN=DDX54 PE=1 SV=2	133.39	infected_2
Q9ULK2	Ataxin-7-like protein 1 OS=Homo sapiens GN=ATXN7L1 PE=1 SV=3	84.67	infected_2
Q5VZ89	DENN domain-containing protein 4C OS=Homo sapiens GN=DENND4C PE=1 SV=2	74.44	infected_2
P0C7V5	Putative zinc finger protein 812 OS=Homo sapiens GN=ZNF812 PE=5 SV=1	155.89	infected_2
P42892	Endothelin-converting enzyme 1 OS=Homo sapiens GN=ECE1 PE=1 SV=2	45.6	infected_2
Q9BZD3	Putative GRINL1B complex locus protein 2 OS=Homo sapiens GN=GCOM2 PE=5 SV=2	36.26	infected_2
O76041	Nebulette OS=Homo sapiens GN=NEBL PE=1 SV=1	152.82	infected_2
Q8IZ21	Phosphatase and actin regulator 4 OS=Homo sapiens GN=PHACTR4 PE=1 SV=1	65.84	infected_2
Q92859	Neogenin OS=Homo sapiens GN=NEO1 PE=1 SV=2	36.11	infected_2
Q9HCC9	Lateral signaling target protein 2 homolog OS=Homo sapiens GN=ZFYVE28 PE=1 SV=3	68.16	infected_2
O00459	Phosphatidylinositol 3-kinase regulatory subunit beta OS=Homo sapiens GN=PIK3R2 PE=1 SV=2	29	infected_2
Q9UBW7	Zinc finger MYM-type protein 2 OS=Homo sapiens GN=ZMYM2 PE=1 SV=1	82.54	infected_2
Q8NDW8	Tetratricopeptide repeat protein 21A OS=Homo sapiens GN=TTC21A PE=2 SV=3	26.76	infected_2
P09874	Poly [ADP-ribose] polymerase 1 OS=Homo sapiens GN=PARP1 PE=1 SV=4	127.42	infected_2
Q9Y6R4	Mitogen-activated protein kinase kinase kinase 4 OS=Homo sapiens GN=MAP3K4 PE=1 SV=2	54.87	infected_2
Q9H3C7	Gametogenetin-binding protein 2 OS=Homo sapiens GN=GGNBP2 PE=1 SV=1	117.68	infected_2
O60684	Importin subunit alpha-7 OS=Homo sapiens GN=KPNA6 PE=1 SV=1	28.64	infected_2
A1KZ92	Peroxidasin-like protein OS=Homo sapiens GN=PXDNL PE=1 SV=3	111.88	infected_2
P0C7U0	Protein ELFN1 OS=Homo sapiens GN=ELFN1 PE=1 SV=2	124.09	infected_2
P52948	Nuclear pore complex protein Nup98-Nup96 OS=Homo sapiens GN=NUP98 PE=1 SV=4	36.73	infected_2
O95436	Sodium-dependent phosphate transport protein 2B OS=Homo sapiens GN=SLC34A2 PE=1 SV=3	61.96	infected_2
Q8N1Q8	Acyl-coenzyme A thioesterase THEM5 OS=Homo sapiens GN=THEM5 PE=1 SV=2	64.13	infected_2
Q96NS5	Ankyrin repeat and SOCS box protein 16 OS=Homo sapiens GN=ASB16 PE=1 SV=2	51.73	infected_2
Q16825	Tyrosine-protein phosphatase non-receptor type 21 OS=Homo sapiens GN=PTPN21 PE=1 SV=2	115.76	infected_2
Q2VWA4	SKI family transcriptional corepressor 2 OS=Homo sapiens GN=SKOR2 PE=1 SV=2	99.93	infected_2
Q9ULI3	Protein HEG homolog 1 OS=Homo sapiens GN=HEG1 PE=1 SV=3	101.92	infected_2
P23470	Receptor-type tyrosine-protein phosphatase gamma OS=Homo sapiens GN=PTPRG PE=1 SV=4	69.16	infected_2
Q9Y6Q3	Zinc finger protein 37 homolog OS=Homo sapiens GN=ZFP37 PE=2 SV=3	84.68	infected_2
Q8NDV3	Structural maintenance of chromosomes protein 1B OS=Homo sapiens GN=SMC1B PE=2 SV=2	97.83	infected_2
Q96AY3	Peptidyl-prolyl cis-trans isomerase FKBP10 OS=Homo sapiens GN=FKBP10 PE=1 SV=1	29.97	infected_2
Q92832	Protein kinase C-binding protein NELL1 OS=Homo sapiens GN=NELL1 PE=1 SV=4	94.54	infected_2
Q16816	Phosphorylase b kinase gamma catalytic chain, skeletal muscle/heart isoform OS=Homo sapiens GN=PHKG1 PE=2 SV=3	29.83	infected_2
Q6ZNL6	FYVE, RhoGEF and PH domain-containing protein 5 OS=Homo sapiens GN=FGD5 PE=1 SV=3	53.69	infected_2
Q99567	Nuclear pore complex protein Nup88 OS=Homo sapiens GN=NUP88 PE=1 SV=2	80.1	infected_2
Q02040	A-kinase anchor protein 17A OS=Homo sapiens GN=AKAP17A PE=1 SV=2	37.03	infected_2
O60306	Intron-binding protein aquarius OS=Homo sapiens GN=AQR PE=1 SV=4	61.95	infected_2
O43795	Unconventional myosin-Ib OS=Homo sapiens GN=MYO1B PE=1 SV=3	52.51	infected_2
Q5ST30	Valine--tRNA ligase, mitochondrial OS=Homo sapiens GN=VARS2 PE=1 SV=2	29.3	infected_2
Q14997	Proteasome activator complex subunit 4 OS=Homo sapiens GN=PSME4 PE=1 SV=2	65.21	infected_2
Q2M243	Coiled-coil domain-containing protein 27 OS=Homo sapiens GN=CCDC27 PE=2 SV=2	13.23	infected_2
Q9NUP7	tRNA:m(4)X modification enzyme TRM13 homolog OS=Homo sapiens GN=TRMT13 PE=1 SV=2	143.6	infected_2
Q92823	Neuronal cell adhesion molecule OS=Homo sapiens GN=NRCAM PE=1 SV=3	132.04	infected_2
Q76M96	Coiled-coil domain-containing protein 80 OS=Homo sapiens GN=CCDC80 PE=1 SV=1	28.81	infected_2
P09848	Lactase-phlorizin hydrolase OS=Homo sapiens GN=LCT PE=1 SV=3	14.71	infected_2
Q99550	M-phase phosphoprotein 9 OS=Homo sapiens GN=MPHOSPH9 PE=1 SV=4	43.56	infected_2
Q8NDT2	Putative RNA-binding protein 15B OS=Homo sapiens GN=RBM15B PE=1 SV=3	55.78	infected_2
Q5VZ46	Uncharacterized protein KIAA1614 OS=Homo sapiens GN=KIAA1614 PE=2 SV=3	88.93	infected_2
Q8IVG5	Sterile alpha motif domain-containing protein 9-like OS=Homo sapiens GN=SAMD9L PE=1 SV=2	83.05	infected_2
O43781	Dual specificity tyrosine-phosphorylation-regulated kinase 3 OS=Homo sapiens GN=DYRK3 PE=2 SV=3	62.47	infected_2
