# Supplementary material for: Dysregulated miRNAome and Proteome of PPRV Infected Goat PBMCs Reveal a Coordinated Immune Response
Source: Front Immunol. 2018 Nov 21;9:2631. doi: 10.3389/fimmu.2018.02631 (PMC6262310; doi:10.3389/fimmu.2018.02631)
Supplement: Table S7 — DEmiRNAs that regulates the expression of TGFBR2. [file Table_7.XLSX]

## Sheet: Sheet1
DemiRNAs that regulates the expression of TGFBR2
miR-3064
miR-2358
miR-664a
miR-142
miR-2311
miR-484
miR-769
miR-574
miR-2440
miR-21-5p
miR-1434
miR-6119
miR-339b
miR-2284x
miR-339a
miR-1291
miR-212
miR-149
miR-452
miR-378b
miR-200c
